# Supplementary material for: Genetic determinants of polygenic prediction accuracy within a population
Source: Research Square preprint supplement (doi:10.21203/rs.3.rs-1157621/v1), 2022-01-13
Supplement: Supplementary file 1 [file 10a29fb3b7f3485b00f6ff55.xlsx]

## Sheet: FDR_PRS_effects
Trait	Effect	Effect Allele	Other Allele	Coefficient	Model
BMI	polygenic risk score	NA	NA	0.958943	baseline model
BMI	polygenic risk score	NA	NA	0.954082	model with complex effects
BMI	rs1421085 dominance effect - Effect Allele	T	C	-0.0927248	model with complex effects
BMI	rs34891368 dominance effect - Effect Allele	C	T	-0.101224	model with complex effects
BMI	rs34891368 dominance effect - Other Allele	C	T	0.104588	model with complex effects
FFR	polygenic risk score	NA	NA	0.928989	baseline model
FFR	polygenic risk score	NA	NA	0.932451	model with complex effects
FFR	rs6833979 dominance effect - Other Allele	G	A	-0.000747878	model with complex effects
HbA1c	polygenic risk score	NA	NA	0.886366	baseline model
HbA1c	polygenic risk score	NA	NA	0.878001	model with complex effects
HbA1c	rs7923837 dominance effect - Effect Allele	G	A	0.0703211	model with complex effects
HbA1c	rs34872471 dominance effect - Other Allele	T	C	0.0120514	model with complex effects
HbA1c	rs78025551 dominance effect - Other Allele	C	G	-0.108913	model with complex effects
HbA1c	rs7904519 dominance effect - Effect Allele	A	G	0.0800906	model with complex effects
HbA1c	rs72826094 dominance effect - Other Allele	A	T	0.0768832	model with complex effects
HbA1c	rs112121515 dominance effect - Effect Allele	C	T	-0.100703	model with complex effects
HbA1c	rs112121515 dominance effect - Other Allele	C	T	0.0857368	model with complex effects
HbA1c	rs4499538 dominance effect - Effect Allele	C	A	-1.0093	model with complex effects
HbA1c	rs9859406 dominance effect - Other Allele	G	A	0.0318889	model with complex effects
HbA1c	rs1046316 dominance effect - Other Allele	G	A	-0.0734878	model with complex effects
HbA1c	rs147228463 dominance effect - Effect Allele	G	C	-1.30457	model with complex effects
HbA1c	rs147228463 dominance effect - Other Allele	G	C	0.0806257	model with complex effects
HbA1c	rs9368222 dominance effect - Effect Allele	C	A	-0.344939	model with complex effects
HbA1c	rs506770 dominance effect - Effect Allele	C	G	-0.195845	model with complex effects
HbA1c	rs9267654 dominance effect - Effect Allele	G	A	-0.0625958	model with complex effects
HbA1c	rs9267922 dominance effect - Effect Allele	G	A	-0.170378	model with complex effects
HbA1c	rs9267922 dominance effect - Other Allele	G	A	0.0991782	model with complex effects
HbA1c	rs9273367 dominance effect - Effect Allele	A	T	-0.397276	model with complex effects
HbA1c	rs9273367 dominance effect - Other Allele	A	T	-0.196741	model with complex effects
HbA1c	rs62397687 dominance effect - Effect Allele	C	T	-0.175418	model with complex effects
LDL	polygenic risk score	NA	NA	0.718253	baseline model
LDL	polygenic risk score	NA	NA	0.720906	model with complex effects
LDL	11:61614426_CT_C dominance effect - Effect Allele	CT	C	0.0100182	model with complex effects
LDL	11:61614426_CT_C dominance effect - Other Allele	CT	C	-0.0018906	model with complex effects
LDL	rs7350481 dominance effect - Other Allele	C	T	0.00713594	model with complex effects
LDL	rs964184 dominance effect - Other Allele	C	G	0.0132866	model with complex effects
LDL	rs6589566 dominance effect - Other Allele	A	G	0.0114165	model with complex effects
LDL	rs662799 dominance effect - Other Allele	A	G	-0.019337	model with complex effects
LDL	rs56228609 dominance effect - Effect Allele	C	T	0.0183838	model with complex effects
LDL	rs6511720 dominance effect - Other Allele	G	T	-0.0141599	model with complex effects
LDL	rs756350040 dominance effect - Effect Allele	TGACA	T	0.272244	model with complex effects
LDL	rs756350040 dominance effect - Other Allele	TGACA	T	-0.00502941	model with complex effects
LDL	rs10401176 dominance effect - Other Allele	C	T	0.0229803	model with complex effects
LDL	rs395908 dominance effect - Effect Allele	G	A	-0.00767047	model with complex effects
LDL	rs393584 dominance effect - Effect Allele	G	A	-0.00110371	model with complex effects
LDL	rs393584 dominance effect - Other Allele	G	A	-0.000720843	model with complex effects
LDL	rs6859 dominance effect - Effect Allele	G	A	-0.0013176	model with complex effects
LDL	rs6859 dominance effect - Other Allele	G	A	-0.00716834	model with complex effects
LDL	rs6857 dominance effect - Effect Allele	C	T	0.0319526	model with complex effects
LDL	rs6857 dominance effect - Other Allele	C	T	-0.047429	model with complex effects
LDL	rs157580 dominance effect - Effect Allele	A	G	0.0277949	model with complex effects
LDL	rs157580 dominance effect - Other Allele	A	G	-0.0128021	model with complex effects
LDL	rs59007384 dominance effect - Effect Allele	G	T	-0.0503973	model with complex effects
LDL	rs59007384 dominance effect - Other Allele	G	T	0.0139608	model with complex effects
LDL	rs11668327 dominance effect - Other Allele	G	C	0.00911982	model with complex effects
LDL	rs405509 dominance effect - Effect Allele	G	T	-0.0273923	model with complex effects
LDL	rs405509 dominance effect - Other Allele	G	T	0.0323892	model with complex effects
LDL	rs429358 dominance effect - Effect Allele	T	C	0.13719	model with complex effects
LDL	rs429358 dominance effect - Other Allele	T	C	-0.0674529	model with complex effects
LDL	rs1065853 dominance effect - Effect Allele	G	T	0.221797	model with complex effects
LDL	rs1065853 dominance effect - Other Allele	G	T	-0.0586439	model with complex effects
LDL	rs439401 dominance effect - Effect Allele	C	T	-0.00604555	model with complex effects
LDL	rs439401 dominance effect - Other Allele	C	T	-0.0125562	model with complex effects
LDL	rs12721046 dominance effect - Effect Allele	G	A	-0.0317135	model with complex effects
LDL	rs12721046 dominance effect - Other Allele	G	A	0.00833465	model with complex effects
LDL	rs157595 dominance effect - Effect Allele	G	A	-0.0117958	model with complex effects
LDL	rs157595 dominance effect - Other Allele	G	A	0.022307	model with complex effects
LDL	rs60049679 dominance effect - Effect Allele	G	C	0.0228406	model with complex effects
LDL	rs60049679 dominance effect - Other Allele	G	C	0.0014194	model with complex effects
LDL	rs114448690 dominance effect - Other Allele	G	A	0.00833272	model with complex effects
LDL	rs7246100 dominance effect - Effect Allele	T	C	0.0191614	model with complex effects
LDL	rs7246100 dominance effect - Other Allele	T	C	-0.0140303	model with complex effects
LDL	rs12979278 dominance effect - Other Allele	T	C	-0.0209223	model with complex effects
LDL	rs200159426 dominance effect - Effect Allele	A	G	0.0233885	model with complex effects
LDL	rs693668 dominance effect - Effect Allele	A	G	-0.0149199	model with complex effects
LDL	rs4344355 dominance effect - Other Allele	C	T	-0.0141216	model with complex effects
LDL	rs12740374 dominance effect - Effect Allele	G	T	0.0271523	model with complex effects
LDL	rs12740374 dominance effect - Other Allele	G	T	-0.0314442	model with complex effects
LDL	rs2618566 dominance effect - Other Allele	T	G	0.011854	model with complex effects
LDL	2:21266774_GGCAGCGCCA_G dominance effect - Effect Allele	GGCAGCGCCA	G	0.0247777	model with complex effects
LDL	rs563290 dominance effect - Effect Allele	A	G	0.0408838	model with complex effects
LDL	rs563290 dominance effect - Other Allele	A	G	-0.0246976	model with complex effects
LDL	rs4299376 dominance effect - Effect Allele	T	G	0.0250117	model with complex effects
LDL	rs10045497 dominance effect - Other Allele	C	A	0.0102503	model with complex effects
LDL	rs13167071 dominance effect - Effect Allele	C	G	0.0164811	model with complex effects
LDL	rs13167071 dominance effect - Other Allele	C	G	-0.00662449	model with complex effects
LDL	rs7746081 dominance effect - Effect Allele	G	A	0.00461032	model with complex effects
LDL	rs7746081 dominance effect - Other Allele	G	A	-0.0101592	model with complex effects
LDL	rs144861591 dominance effect - Effect Allele	C	T	0.182408	model with complex effects
LDL	rs686250 dominance effect - Effect Allele	G	A	0.0108018	model with complex effects
LDL	rs17725246 dominance effect - Other Allele	T	C	0.0125232	model with complex effects
LDL	rs13702 dominance effect - Effect Allele	T	C	0.0274179	model with complex effects
LDL	rs13702 dominance effect - Other Allele	T	C	-0.0108934	model with complex effects
LDL	rs2954021 dominance effect - Effect Allele	G	A	-0.0158894	model with complex effects
LDL	rs2954021 dominance effect - Other Allele	G	A	0.0134339	model with complex effects
LDL	9:136149709_AC_A dominance effect - Other Allele	AC	A	0.0204321	model with complex effects
TG	polygenic risk score	NA	NA	0.542069	baseline model
TG	polygenic risk score	NA	NA	0.651614	model with complex effects
TG	rs7896518 dominance effect - Effect Allele	A	G	0.0096907	model with complex effects
TG	rs7896518 dominance effect - Other Allele	A	G	-0.0298135	model with complex effects
TG	rs4418728 dominance effect - Effect Allele	G	T	0.00201887	model with complex effects
TG	rs4418728 dominance effect - Other Allele	G	T	-0.0194559	model with complex effects
TG	rs102275 dominance effect - Effect Allele	T	C	-0.0130587	model with complex effects
TG	rs102275 dominance effect - Other Allele	T	C	0.0186975	model with complex effects
TG	11:116526032_CCT_C dominance effect - Effect Allele	CCT	C	0.0554485	model with complex effects
TG	11:116526032_CCT_C dominance effect - Other Allele	CCT	C	-0.0208117	model with complex effects
TG	rs74849419 dominance effect - Effect Allele	G	A	0.0462156	model with complex effects
TG	rs74849419 dominance effect - Other Allele	G	A	-0.0502205	model with complex effects
TG	rs10466588 dominance effect - Effect Allele	A	G	-0.0736431	model with complex effects
TG	rs10466588 dominance effect - Other Allele	A	G	0.00148569	model with complex effects
TG	11:116639730_CA_C dominance effect - Effect Allele	CA	C	-0.0227854	model with complex effects
TG	11:116639730_CA_C dominance effect - Other Allele	CA	C	0.0157739	model with complex effects
TG	rs2266788 dominance effect - Effect Allele	A	G	-0.0354369	model with complex effects
TG	rs2266788 dominance effect - Other Allele	A	G	-0.0776906	model with complex effects
TG	rs2072560 dominance effect - Other Allele	C	T	-0.113218	model with complex effects
TG	rs12287066 dominance effect - Effect Allele	G	T	0.201585	model with complex effects
TG	rs12287066 dominance effect - Other Allele	G	T	-0.157229	model with complex effects
TG	rs6589568 dominance effect - Effect Allele	A	G	0.0171783	model with complex effects
TG	rs6589568 dominance effect - Other Allele	A	G	-0.0288518	model with complex effects
TG	rs11216180 dominance effect - Effect Allele	A	T	0.0887937	model with complex effects
TG	rs11216180 dominance effect - Other Allele	A	T	-0.0703939	model with complex effects
TG	rs173539 dominance effect - Effect Allele	C	T	0.0162859	model with complex effects
TG	rs173539 dominance effect - Other Allele	C	T	-0.00989159	model with complex effects
TG	rs12443634 dominance effect - Effect Allele	C	A	-0.0178535	model with complex effects
TG	rs12443634 dominance effect - Other Allele	C	A	0.0203888	model with complex effects
TG	rs377227476 dominance effect - Other Allele	TCAAAA	T	0.0177205	model with complex effects
TG	rs58542926 dominance effect - Effect Allele	C	T	0.210144	model with complex effects
TG	rs58542926 dominance effect - Other Allele	C	T	-0.0346596	model with complex effects
TG	rs438811 dominance effect - Effect Allele	C	T	-0.0064315	model with complex effects
TG	rs438811 dominance effect - Other Allele	C	T	-0.0109248	model with complex effects
TG	1:62929378_TA_T dominance effect - Effect Allele	TA	T	0.0475049	model with complex effects
TG	1:62929378_TA_T dominance effect - Other Allele	TA	T	-0.0169547	model with complex effects
TG	rs764992666 dominance effect - Effect Allele	T	TCTTAAAGTGTTCAGCACTCCC	-0.0192177	model with complex effects
TG	rs764992666 dominance effect - Other Allele	T	TCTTAAAGTGTTCAGCACTCCC	0.00984379	model with complex effects
TG	rs6073958 dominance effect - Other Allele	T	C	0.0278564	model with complex effects
TG	rs2267372 dominance effect - Effect Allele	G	A	0.0149586	model with complex effects
TG	rs2267372 dominance effect - Other Allele	G	A	0.00224682	model with complex effects
TG	rs2294915 dominance effect - Effect Allele	C	T	0.0457467	model with complex effects
TG	rs673548 dominance effect - Effect Allele	G	A	0.0303081	model with complex effects
TG	rs673548 dominance effect - Other Allele	G	A	-0.0279221	model with complex effects
TG	rs1260326 dominance effect - Effect Allele	C	T	-0.0280213	model with complex effects
TG	rs1260326 dominance effect - Other Allele	C	T	0.0332004	model with complex effects
TG	rs2673140 dominance effect - Effect Allele	A	G	0.00817497	model with complex effects
TG	rs2673140 dominance effect - Other Allele	A	G	-0.0184316	model with complex effects
TG	rs1471251 dominance effect - Effect Allele	A	T	-0.00645307	model with complex effects
TG	rs1471251 dominance effect - Other Allele	A	T	0.0172066	model with complex effects
TG	rs40270 dominance effect - Effect Allele	C	A	0.0198364	model with complex effects
TG	rs40270 dominance effect - Other Allele	C	A	-0.0202332	model with complex effects
TG	rs13179413 dominance effect - Effect Allele	C	T	-0.0142285	model with complex effects
TG	rs13179413 dominance effect - Other Allele	C	T	0.0147623	model with complex effects
TG	rs7720409 dominance effect - Other Allele	G	A	-0.0102653	model with complex effects
TG	rs13167071 dominance effect - Effect Allele	C	G	0.0173165	model with complex effects
TG	rs13167071 dominance effect - Other Allele	C	G	-0.0191223	model with complex effects
TG	rs9378248 dominance effect - Effect Allele	G	A	0.000514845	model with complex effects
TG	rs9378248 dominance effect - Other Allele	G	A	0.0114484	model with complex effects
TG	rs4711750 dominance effect - Effect Allele	T	A	-0.00696527	model with complex effects
TG	rs4711750 dominance effect - Other Allele	T	A	0.0087046	model with complex effects
TG	rs6458867 dominance effect - Effect Allele	G	A	-0.00661553	model with complex effects
TG	rs6458867 dominance effect - Other Allele	G	A	0.00830774	model with complex effects
TG	rs4052908 dominance effect - Effect Allele	AATT	A	-0.0105766	model with complex effects
TG	rs4052908 dominance effect - Other Allele	AATT	A	0.0149104	model with complex effects
TG	rs12212507 dominance effect - Other Allele	G	A	0.00179023	model with complex effects
TG	rs11751347 dominance effect - Other Allele	C	T	0.0157595	model with complex effects
TG	rs13234131 dominance effect - Effect Allele	A	G	0.0165505	model with complex effects
TG	rs13234131 dominance effect - Other Allele	A	G	-0.0177886	model with complex effects
TG	rs4717804 dominance effect - Other Allele	C	A	0.00061701	model with complex effects
TG	rs35363532 dominance effect - Effect Allele	C	CT	0.0039229	model with complex effects
TG	rs35363532 dominance effect - Other Allele	C	CT	-0.00842832	model with complex effects
TG	rs9657541 dominance effect - Effect Allele	C	T	-0.0151545	model with complex effects
TG	rs9657541 dominance effect - Other Allele	C	T	-0.00629667	model with complex effects
TG	rs4921913 dominance effect - Effect Allele	T	C	-0.0394802	model with complex effects
TG	rs4921913 dominance effect - Other Allele	T	C	0.0163345	model with complex effects
TG	rs117199990 dominance effect - Effect Allele	C	T	0.00872431	model with complex effects
TG	rs117199990 dominance effect - Other Allele	C	T	0.00774044	model with complex effects
TG	rs34150554 dominance effect - Effect Allele	T	TA	-0.00570019	model with complex effects
TG	rs34150554 dominance effect - Other Allele	T	TA	-0.00677159	model with complex effects
TG	rs6586886 dominance effect - Effect Allele	G	A	0.0216217	model with complex effects
TG	rs6586886 dominance effect - Other Allele	G	A	-0.00980162	model with complex effects
TG	rs28597716 dominance effect - Other Allele	A	G	0.000554988	model with complex effects
TG	rs10113750 dominance effect - Effect Allele	C	T	-0.0201038	model with complex effects
TG	rs10113750 dominance effect - Other Allele	C	T	0.0131059	model with complex effects
TG	rs28601761 dominance effect - Effect Allele	C	G	-0.0119175	model with complex effects
TG	rs28601761 dominance effect - Other Allele	C	G	-0.00468828	model with complex effects
TG	rs2954038 dominance effect - Effect Allele	A	C	0.00349453	model with complex effects
TG	rs2954038 dominance effect - Other Allele	A	C	-0.00767702	model with complex effects
calcium	polygenic risk score	NA	NA	0.89247	baseline model
calcium	polygenic risk score	NA	NA	0.892102	model with complex effects
calcium	rs7739995 dominance effect - Other Allele	G	A	-0.00119606	model with complex effects
glucose	polygenic risk score	NA	NA	0.869061	baseline model
glucose	polygenic risk score	NA	NA	0.824042	model with complex effects
glucose	rs11187019 dominance effect - Other Allele	G	A	0.0198359	model with complex effects
glucose	rs34872471 dominance effect - Effect Allele	T	C	-0.00755467	model with complex effects
glucose	rs34872471 dominance effect - Other Allele	T	C	-0.00611564	model with complex effects
glucose	rs78025551 dominance effect - Other Allele	C	G	-0.0214406	model with complex effects
glucose	rs56299331 dominance effect - Effect Allele	C	T	-0.04738	model with complex effects
glucose	rs56299331 dominance effect - Other Allele	C	T	0.0130098	model with complex effects
glucose	rs61894887 dominance effect - Effect Allele	T	C	-3.74692	model with complex effects
glucose	rs116782923 dominance effect - Effect Allele	A	T	-0.148513	model with complex effects
glucose	rs7766070 dominance effect - Effect Allele	C	A	-0.0400807	model with complex effects
glucose	rs9273363 dominance effect - Effect Allele	C	A	-0.0746804	model with complex effects
glucose	rs555058781 dominance effect - Effect Allele	A	G	-0.0512101	model with complex effects
glucose	rs555058781 dominance effect - Other Allele	A	G	0.0198199	model with complex effects
glucose	7:15052179_AAGGGGACAAAGCC_A dominance effect - Other Allele	AAGGGGACAAAGCC	A	0.0200341	model with complex effects
heelBMD	polygenic risk score	NA	NA	0.870305	baseline model
heelBMD	polygenic risk score	NA	NA	0.866082	model with complex effects
heelBMD	rs2536196 dominance effect - Effect Allele	C	T	0.00367483	model with complex effects
heelBMD	rs2536196 dominance effect - Other Allele	C	T	0.00411698	model with complex effects
platelet	polygenic risk score	NA	NA	0.818119	baseline model
platelet	polygenic risk score	NA	NA	0.825391	model with complex effects
platelet	rs11553699 dominance effect - Effect Allele	A	G	7.7227	model with complex effects
platelet	rs11553699 dominance effect - Other Allele	A	G	3.41288	model with complex effects
platelet	rs11082304 dominance effect - Effect Allele	T	G	-1.53447	model with complex effects
platelet	rs1354034 dominance effect - Effect Allele	C	T	3.41724	model with complex effects
platelet	rs5745587 dominance effect - Effect Allele	A	G	2.20001	model with complex effects
platelet	rs5745587 dominance effect - Other Allele	A	G	-1.20693	model with complex effects
platelet	rs9399136 dominance effect - Effect Allele	T	C	-2.36338	model with complex effects
platelet	rs692502 dominance effect - Effect Allele	A	G	-2.47661	model with complex effects
platelet	rs692502 dominance effect - Other Allele	A	G	0.96937	model with complex effects
vD	polygenic risk score	NA	NA	0.703625	baseline model
vD	polygenic risk score	NA	NA	0.659175	model with complex effects
vD	rs12283049 dominance effect - Other Allele	A	G	0.426639	model with complex effects
vD	rs2144530 dominance effect - Other Allele	T	C	0.362466	model with complex effects
vD	rs10468017 dominance effect - Other Allele	C	T	-0.24195	model with complex effects
vD	rs10425963 dominance effect - Effect Allele	A	G	-0.658723	model with complex effects
vD	rs10425963 dominance effect - Other Allele	A	G	0.299203	model with complex effects
vD	rs903911 dominance effect - Other Allele	A	G	-0.288388	model with complex effects
vD	rs7439366 dominance effect - Other Allele	T	C	-0.409834	model with complex effects
vD	rs11723621 dominance effect - Effect Allele	A	G	0.878058	model with complex effects
vD	rs11723621 dominance effect - Other Allele	A	G	-0.706915	model with complex effects
vD	rs1057868 dominance effect - Effect Allele	C	T	-0.33927	model with complex effects
vD	rs1057868 dominance effect - Other Allele	C	T	0.276897	model with complex effects
