# Supplementary material for: Genetic determinants of polygenic prediction accuracy within a population
Source: Research Square preprint supplement (doi:10.21203/rs.3.rs-1157621/v1), 2022-01-13
Supplement: Supplementary file 2 [file 312ae7e78caf52df445d629a.xlsx]

## Sheet: annotate_pvQTL
Chr	Position	SNP	Trait	Gene symbol	annotation	description	region	distance	subregion	inside distance	exon number	# exons	UTR	strand	gene length
chr12	50263148	rs7132908	BMI	FAIM2	NM_012306 NP_036438 XM_005268730 XP_005268787	inside exon	inside	34611	inside exon	0	12	12	3'UTR	-	37081
chr16	31011821	rs12716979	BMI	STX1B	NM_052874 NP_443106 XM_017022893 XP_016878382	inside intron	inside	10007	inside intron	426	4	9	inside transcription region	-	17426
chr16	53800954	rs1421085	BMI	FTO	NM_001080432 NM_001363891 NM_001363894 NM_001363896 NM_001363897 NM_001363898 NM_001363899 NM_001363900 NM_001363901 NM_001363903 NM_001363905 NM_001363988 NP_001073901 NP_001350820 NP_001350823 NP_001350825 NP_001350826 NP_001350827 NP_001350828 NP_001350829 NP_001350830 NP_001350832 NP_001350834 NP_001350917 NR_156761 XM_011523314 XM_011523315 XM_011523316 XM_017023654 XM_017023655 XM_017023656…	inside intron	inside	63079	inside intron	43096	2	8	5' UTR	+	410504
chr18	57784116	rs145951492	BMI	PMAIP1	NM_001382615 NM_001382616 NM_001382617 NM_001382618 NM_001382623 NM_021127 NP_001369544 NP_001369545 NP_001369546 NP_001369547 NP_001369552 NP_066950	downstream	downstream	216924	NA	NA	NA	3	NA	+	4346
chr19	46181392	rs1800437	BMI	GIPR	NM_000164 NM_001308418 NP_000155 NP_001295347 XM_011526709 XM_011526710 XM_011526711 XM_011526713 XM_011526714 XM_011526715 XM_011526716 XM_017026584 XM_017026585 XM_017026586 XM_017026587 XP_011525011 XP_011525012 XP_011525013 XP_011525015 XP_011525016 XP_011525017 XP_011525018 XP_016882073 XP_016882074 XP_016882075 XP_016882076 XR_001753655 XR_935791	inside exon	inside	9890	inside exon	0	10	12	inside transcription region	+	14215
chr1	177894287	rs506589	BMI	SEC16B	NM_001356499 NM_001356500 NM_001390833 NM_001390834 NM_001390835 NM_033127 NP_001343428 NP_001377762 NP_001377763 NP_001377764 NP_149118	downstream	downstream	112854	NA	NA	NA	27	NA	-	109653
chr1	219643649	rs2605098	BMI	SLC30A10	NM_001004433 NM_001376929 NM_018713 NP_001363858 NP_061183 NR_046437 NR_165031 XM_017001684 XP_016857173	downstream	downstream	488339	NA	NA	NA	9	NA	-	273220
chr2	650519	rs13401686	BMI	TMEM18	NM_001352680 NM_001352681 NM_152834 NP_001339609 NP_001339610 NP_690047	downstream	downstream	26919	NA	NA	NA	5	NA	-	9466
chr3	131646163	rs779470261	BMI	CPNE4	NM_001289112 NM_001388326 NM_001388327 NM_130808 NM_153429 NP_001276041 NP_001375255 NP_001375256 NP_570720 NP_702907 XM_011512408 XM_017005694 XM_017005695 XM_017005696 XM_024453338 XM_024453339 XM_024453340 XP_011510710 XP_016861183 XP_016861184 XP_016861185 XP_024309106 XP_024309107 XP_024309108	inside intron	inside	358090	inside intron	-21874	6	20	5' UTR	-	750677
chr6	26463574	rs13195401	BMI	BTN2A1	NM_001197233 NM_001197234 NM_007049 NM_078476 NP_001184162 NP_001184163 NP_008980 NP_510961	inside exon	inside	5421	inside exon	0	4	8	inside transcription region	+	18696
chr6	50858235	rs72891717	BMI	TFAP2B	NM_003221 NP_003212 XM_011514837 XM_017011233 XM_017011234 XM_017011235 XP_011513139 XP_016866722 XP_016866723 XP_016866724	downstream	downstream	71796	NA	NA	NA	7	NA	+	28887
chr8	10956707	rs34891368	BMI	XKR6	NM_173683 NP_775954 NR_138152 NR_138153 NR_138154 XM_011543821 XM_024447129 XP_011542123 XP_024302897 XR_001745511 XR_948899	inside intron	inside	102167	inside intron	101376	1	3	inside transcription region	-	305218
chr6	10869648	rs7739995	Calcium	SYCP2L	NM_001040274 NM_194299 NP_001035364	inside intron	inside	121653	inside intron	22096	4	6	inside transcription region	+	146442
chr15	78899003	rs56077333	FEV1 / FVC ratio	CHRNA3	NM_000743 NM_001166694 NP_000734 NP_001160166 NR_046313 XM_006720382 XP_006720445	inside intron	inside	14633	inside intron	-4396	5	6	inside transcription region	-	25990
chr4	145463521	rs6833979	FEV1 / FVC ratio	HHIP-AS1	NR_037595	downstream	downstream	103649	NA	NA	NA	2	NA	-	3103
chr10	94248310	rs11187019	Glucose	IDE	NM_001165946 NM_001322793 NM_001322794 NM_001322795 NM_001322796 NM_001322797 NM_004969 NP_001159418 NP_001309722 NP_001309723 NP_001309724 NP_001309725 NP_001309726 NP_004960 NR_136399 XM_017016187 XM_017016188 XM_017016189 XM_017016190 XP_016871676 XP_016871677 XP_016871678 XP_016871679 XR_001747103 XR_945727	inside intron	inside	85541	inside intron	-1234	13	25	inside transcription region	-	122411
chr10	114748029	rs11196180	Glucose	TCF7L2	NM_001146274 NM_001146283 NM_001146284 NM_001146285 NM_001146286 NM_001198525 NM_001198526 NM_001198527 NM_001198528 NM_001198529 NM_001198530 NM_001198531 NM_001349870 NM_001349871 NM_001363501 NM_001367943 NM_030756 NP_001139746 NP_001139755 NP_001139756 NP_001139757 NP_001139758 NP_001185454 NP_001185455 NP_001185456 NP_001185457 NP_001185458 NP_001185459 NP_001185460 NP_001336799 NP_001336800…	inside intron	inside	37147	inside intron	-36662	2	13	inside transcription region	+	216554
chr10	114754071	rs34872471	Glucose	TCF7L2	NM_001146274 NM_001146283 NM_001146284 NM_001146285 NM_001146286 NM_001198525 NM_001198526 NM_001198527 NM_001198528 NM_001198529 NM_001198530 NM_001198531 NM_001349870 NM_001349871 NM_001363501 NM_001367943 NM_030756 NP_001139746 NP_001139755 NP_001139756 NP_001139757 NP_001139758 NP_001185454 NP_001185455 NP_001185456 NP_001185457 NP_001185458 NP_001185459 NP_001185460 NP_001336799 NP_001336800…	inside intron	inside	43189	inside intron	-42704	2	13	inside transcription region	+	216554
chr10	114757956	rs78025551	Glucose	TCF7L2	NM_001146274 NM_001146283 NM_001146284 NM_001146285 NM_001146286 NM_001198525 NM_001198526 NM_001198527 NM_001198528 NM_001198529 NM_001198530 NM_001198531 NM_001349870 NM_001349871 NM_001363501 NM_001367943 NM_030756 NP_001139746 NP_001139755 NP_001139756 NP_001139757 NP_001139758 NP_001185454 NP_001185455 NP_001185456 NP_001185457 NP_001185458 NP_001185459 NP_001185460 NP_001336799 NP_001336800…	inside intron	inside	47074	inside intron	41826	3	13	inside transcription region	+	216554
chr10	114773927	rs7904519	Glucose	TCF7L2	NM_001146274 NM_001146283 NM_001146284 NM_001146285 NM_001146286 NM_001198525 NM_001198526 NM_001198527 NM_001198528 NM_001198529 NM_001198530 NM_001198531 NM_001349870 NM_001349871 NM_001363501 NM_001367943 NM_030756 NP_001139746 NP_001139755 NP_001139756 NP_001139757 NP_001139758 NP_001185454 NP_001185455 NP_001185456 NP_001185457 NP_001185458 NP_001185459 NP_001185460 NP_001336799 NP_001336800…	inside intron	inside	63045	inside intron	25855	3	13	inside transcription region	+	216554
chr10	114788436	rs56299331	Glucose	TCF7L2	NM_001146274 NM_001146283 NM_001146284 NM_001146285 NM_001146286 NM_001198525 NM_001198526 NM_001198527 NM_001198528 NM_001198529 NM_001198530 NM_001198531 NM_001349870 NM_001349871 NM_001363501 NM_001367943 NM_030756 NP_001139746 NP_001139755 NP_001139756 NP_001139757 NP_001139758 NP_001185454 NP_001185455 NP_001185456 NP_001185457 NP_001185458 NP_001185459 NP_001185460 NP_001336799 NP_001336800…	inside intron	inside	77554	inside intron	11346	3	13	inside transcription region	+	216554
chr11	55032582	rs61894887	Glucose	TRIM48	NM_024114 NP_077019	inside exon	inside	2924	inside exon	0	2	6	inside transcription region	+	8937
chr5	102331465	rs116782923	Glucose	PAM	NM_000919 NM_001177306 NM_001319943 NM_001364582 NM_001364583 NM_001364584 NM_001364585 NM_001364586 NM_001364587 NM_001364588 NM_001364589 NM_001364590 NM_001364591 NM_001364592 NM_001364593 NM_001364594 NM_138766 NM_138821 NM_138822 NP_000910 NP_001170777 NP_001306872 NP_001351511 NP_001351512 NP_001351513 NP_001351514 NP_001351515 NP_001351516 NP_001351517 NP_001351518 NP_001351519 NP_00135152…	inside intron	inside	35886	inside intron	-5359	4	5	inside transcription region	+	43274
chr6	20686573	rs7766070	Glucose	CDKAL1	NM_017774 NP_060244 XM_011514718 XM_011514719 XM_017010986 XM_017010987 XM_024446481 XP_011513020 XP_011513021 XP_016866475 XP_016866476 XP_024302249 XR_001743495 XR_001743496 XR_001743498 XR_001743499 XR_001743500 XR_001743501 XR_926265 XR_926266 XR_926267	inside intron	inside	140003	inside intron	-36964	3	14	inside transcription region	+	686064
chr6	32626272	rs9273363	Glucose	HLA-DQB1	NM_001243961 NM_001243962 NM_002123 NP_001230890 NP_001230891 NP_002114	downstream	downstream	8193	NA	NA	NA	6	NA	-	7225
chr6	32684659	rs555058781	Glucose	HLA-DQA2	NM_020056 NP_064440	upstream	upstream	24503	NA	NA	NA	5	NA	+	5501
chr7	15052179	7:15052179_AAGGGGACAAAGCC_A	Glucose	DGKB	NM_001350705 NM_001350706 NM_001350707 NM_001350708 NM_001350709 NM_001350711 NM_001350712 NM_001350714 NM_001350715 NM_001350716 NM_001350717 NM_001350718 NM_001350719 NM_001350720 NM_001350721 NM_001350722 NM_001350723 NM_001350724 NM_004080 NM_145695 NP_001337634 NP_001337635 NP_001337636 NP_001337637 NP_001337638 NP_001337640 NP_001337641 NP_001337643 NP_001337644 NP_001337645 NP_001337646 NP…	upstream	upstream	109629	NA	NA	NA	10	NA	-	217680
chr10	12255175	rs7896600	HbA1c	CDC123	NM_006023 NP_006014 XM_005252638 XP_005252695	inside intron	inside	17214	inside intron	2562	5	13	inside transcription region	+	54628
chr10	80951130	rs34204798	HbA1c	ZMIZ1	NM_020338 NP_065071 XM_005269987 XM_005269988 XM_006717923 XM_006717924 XM_006717925 XM_011539978 XM_011539979 XM_011539980 XM_017016440 XM_017016441 XM_017016442 XM_017016443 XP_005270044 XP_005270045 XP_006717986 XP_006717987 XP_006717988 XP_011538280 XP_011538281 XP_011538282 XP_016871929 XP_016871930 XP_016871931 XP_016871932	inside intron	inside	51691	inside intron	10209	3	5	5' UTR	+	77744
chr10	94481917	rs7923837	HbA1c	HHEX	NM_002729 NP_002720	downstream	downstream	32236	NA	NA	NA	4	NA	+	5727
chr10	114748029	rs11196180	HbA1c	TCF7L2	NM_001146274 NM_001146283 NM_001146284 NM_001146285 NM_001146286 NM_001198525 NM_001198526 NM_001198527 NM_001198528 NM_001198529 NM_001198530 NM_001198531 NM_001349870 NM_001349871 NM_001363501 NM_001367943 NM_030756 NP_001139746 NP_001139755 NP_001139756 NP_001139757 NP_001139758 NP_001185454 NP_001185455 NP_001185456 NP_001185457 NP_001185458 NP_001185459 NP_001185460 NP_001336799 NP_001336800…	inside intron	inside	37147	inside intron	-36662	2	13	inside transcription region	+	216554
chr10	114754071	rs34872471	HbA1c	TCF7L2	NM_001146274 NM_001146283 NM_001146284 NM_001146285 NM_001146286 NM_001198525 NM_001198526 NM_001198527 NM_001198528 NM_001198529 NM_001198530 NM_001198531 NM_001349870 NM_001349871 NM_001363501 NM_001367943 NM_030756 NP_001139746 NP_001139755 NP_001139756 NP_001139757 NP_001139758 NP_001185454 NP_001185455 NP_001185456 NP_001185457 NP_001185458 NP_001185459 NP_001185460 NP_001336799 NP_001336800…	inside intron	inside	43189	inside intron	-42704	2	13	inside transcription region	+	216554
chr10	114757956	rs78025551	HbA1c	TCF7L2	NM_001146274 NM_001146283 NM_001146284 NM_001146285 NM_001146286 NM_001198525 NM_001198526 NM_001198527 NM_001198528 NM_001198529 NM_001198530 NM_001198531 NM_001349870 NM_001349871 NM_001363501 NM_001367943 NM_030756 NP_001139746 NP_001139755 NP_001139756 NP_001139757 NP_001139758 NP_001185454 NP_001185455 NP_001185456 NP_001185457 NP_001185458 NP_001185459 NP_001185460 NP_001336799 NP_001336800…	inside intron	inside	47074	inside intron	41826	3	13	inside transcription region	+	216554
chr10	114773927	rs7904519	HbA1c	TCF7L2	NM_001146274 NM_001146283 NM_001146284 NM_001146285 NM_001146286 NM_001198525 NM_001198526 NM_001198527 NM_001198528 NM_001198529 NM_001198530 NM_001198531 NM_001349870 NM_001349871 NM_001363501 NM_001367943 NM_030756 NP_001139746 NP_001139755 NP_001139756 NP_001139757 NP_001139758 NP_001185454 NP_001185455 NP_001185456 NP_001185457 NP_001185458 NP_001185459 NP_001185460 NP_001336799 NP_001336800…	inside intron	inside	63045	inside intron	25855	3	13	inside transcription region	+	216554
chr10	114801488	rs72826094	HbA1c	TCF7L2	NM_001146274 NM_001146283 NM_001146284 NM_001146285 NM_001146286 NM_001198525 NM_001198526 NM_001198527 NM_001198528 NM_001198529 NM_001198530 NM_001198531 NM_001349870 NM_001349871 NM_001363501 NM_001367943 NM_030756 NP_001139746 NP_001139755 NP_001139756 NP_001139757 NP_001139758 NP_001185454 NP_001185455 NP_001185456 NP_001185457 NP_001185458 NP_001185459 NP_001185460 NP_001336799 NP_001336800…	inside intron	inside	1725	inside intron	-1602	1	11	inside transcription region	+	127673
chr16	53800954	rs1421085	HbA1c	FTO	NM_001080432 NM_001363891 NM_001363894 NM_001363896 NM_001363897 NM_001363898 NM_001363899 NM_001363900 NM_001363901 NM_001363903 NM_001363905 NM_001363988 NP_001073901 NP_001350820 NP_001350823 NP_001350825 NP_001350826 NP_001350827 NP_001350828 NP_001350829 NP_001350830 NP_001350832 NP_001350834 NP_001350917 NR_156761 XM_011523314 XM_011523315 XM_011523316 XM_017023654 XM_017023655 XM_017023656…	inside intron	inside	63079	inside intron	43096	2	8	5' UTR	+	410504
chr22	26687152	rs112121515	HbA1c	SEZ6L	NM_001184773 NM_001184774 NM_001184775 NM_001184776 NM_001184777 NM_021115 NP_001171702 NP_001171703 NP_001171704 NP_001171705 NP_001171706 NP_066938 XM_005261439 XM_005261440 XM_006724195 XM_011530037 XM_011530038 XM_011530039 XM_017028699 XM_017028700 XP_005261496 XP_005261497 XP_006724258 XP_011528339 XP_011528340 XP_011528341 XP_016884188 XP_016884189	inside intron	inside	121712	inside intron	1218	2	16	inside transcription region	+	214123
chr22	49379608	rs4499538	HbA1c	LINC01310	NR_038944	downstream	downstream	117026	NA	NA	NA	7	NA	+	31616
chr2	227022036	rs13405357	HbA1c	LOC646736	NR_046102	inside intron	inside	14526	inside intron	7066	3	7	inside transcription region	+	37268
chr3	185534482	rs9859406	HbA1c	IGF2BP2	NM_001007225 NM_001291869 NM_001291872 NM_001291873 NM_001291874 NM_001291875 NM_006548 NP_001007226 NP_001278798 NP_001278801 NP_001278802 NP_001278803 NP_001278804 NP_006539 NR_138486 XM_006713477 XM_006713478 XM_017005557 XM_017005558 XM_017005559 XM_017005560 XM_017005561 XM_017005562 XM_017005563 XM_017005564 XM_024453316 XP_006713540 XP_006713541 XP_016861046 XP_016861047 XP_016861048 XP_01…	inside intron	inside	8344	inside intron	6457	2	16	inside transcription region	-	181300
chr4	6304087	rs1046316	HbA1c	WFS1	NM_001145853 NM_006005 NP_001139325 NP_005996 XM_017008586 XP_016864075	inside exon	inside	13873	inside exon	0	5	5	inside transcription region	+	14778
chr5	102383967	rs140176198	HbA1c	PAM	NM_000919 NM_001177306 NM_001319943 NM_001364582 NM_001364583 NM_001364584 NM_001364585 NM_001364586 NM_001364587 NM_001364588 NM_001364589 NM_001364590 NM_001364591 NM_001364592 NM_001364593 NM_001364594 NM_138766 NM_138821 NM_138822 NP_000910 NP_001170777 NP_001306872 NP_001351511 NP_001351512 NP_001351513 NP_001351514 NP_001351515 NP_001351516 NP_001351517 NP_001351518 NP_001351519 NP_00135152…	downstream	downstream	40806	NA	NA	NA	6	NA	+	23647
chr6	14003956	rs147228463	HbA1c	RNF182	NM_001165032 NM_001165033 NM_001165034 NM_152737 NP_001158504 NP_001158505 NP_001158506 NP_689950 XM_017010450 XP_016865939	downstream	downstream	78532	NA	NA	NA	2	NA	+	54816
chr6	20686996	rs9368222	HbA1c	CDKAL1	NM_017774 NP_060244 XM_011514718 XM_011514719 XM_017010986 XM_017010987 XM_024446481 XP_011513020 XP_011513021 XP_016866475 XP_016866476 XP_024302249 XR_001743495 XR_001743496 XR_001743498 XR_001743499 XR_001743500 XR_001743501 XR_926265 XR_926266 XR_926267	inside intron	inside	140426	inside intron	-37387	3	14	inside transcription region	+	686064
chr6	31585000	rs2857597	HbA1c	AIF1	NM_001318970 NM_001623 NM_004847 NM_032955 NP_001305899 NP_001614 NP_116573 XM_005248870 XM_017010332 XP_005248927 XP_016865821	close to 3'	close to 3'	1211	NA	NA	NA	3	NA	+	1009
chr6	31785228	rs506770	HbA1c	HSPA1A	NM_005345 NP_005336	inside exon	inside	1937	inside exon	0	1	1	inside transcription region	+	2428
chr6	31841009	rs9267654	HbA1c	SLC44A4	NM_001178044 NM_001178045 NM_025257 NP_001171515 NP_001171516 NP_079533	inside intron	inside	5813	inside intron	1226	6	20	inside transcription region	-	15853
chr6	32206465	rs9267922	HbA1c	NOTCH4	NM_004557 NP_004548 NR_134949 NR_134950	upstream	upstream	14621	NA	NA	NA	11	NA	-	8196
chr6	32337630	rs2273017	HbA1c	TSBP1	NM_001286474 NM_001286475 NM_006781 NP_001273403 NP_001273404 NP_006772 XM_017010182 XM_017010183 XM_024446306 XM_024446307 XP_016865671 XP_016865672 XP_024302074 XP_024302075	inside intron	inside	2025	inside intron	42	2	24	inside transcription region	-	78898
chr6	32348421	rs143895893	HbA1c	TSBP1	NM_001286474 NM_001286475 NM_006781 NP_001273403 NP_001273404 NP_006772 XM_017010182 XM_017010183 XM_024446306 XM_024446307 XP_016865671 XP_016865672 XP_024302074 XP_024302075	upstream	upstream	8765	NA	NA	NA	24	NA	-	78898
chr6	32443961	rs6457594	HbA1c	HLA-DRA	NM_019111 NP_061984	downstream	downstream	36342	NA	NA	NA	5	NA	+	5207
chr6	32626438	rs9273367	HbA1c	HLA-DQB1	NM_001243961 NM_001243962 NM_002123 NP_001230890 NP_001230891 NP_002114	downstream	downstream	8027	NA	NA	NA	6	NA	-	7225
chr6	32802009	rs62397687	HbA1c	TAP2	NM_000544 NM_001290043 NM_018833 NP_000535 NP_001276972 NP_061313	inside intron	inside	4537	inside intron	920	5	13	inside transcription region	-	13360
chr6	32804570	rs3819720	HbA1c	TAP2	NM_000544 NM_001290043 NM_018833 NP_000535 NP_001276972 NP_061313	inside intron	inside	1976	inside intron	742	3	13	inside transcription region	-	13360
chr6	32805470	rs2071465	HbA1c	TAP2	NM_000544 NM_001290043 NM_018833 NP_000535 NP_001276972 NP_061313	inside intron	inside	1076	inside intron	-41	3	13	inside transcription region	-	13360
chr6	32853221	rs11459466	HbA1c	LOC100294145	NR_037177 NR_037178	upstream	upstream	8731	NA	NA	NA	2	NA	+	9582
chr6	32862682	rs3749981	HbA1c	LOC100294145	NR_037177 NR_037178	inside exon	inside	729	inside exon	0	1	2	inside transcription region	+	9582
chr6	32874047	rs374138058	HbA1c	LOC100294145	NR_037177 NR_037178	downstream	downstream	12094	NA	NA	NA	2	NA	+	9582
chr7	28189083	rs1029534	HbA1c	JAZF1	NM_175061 NP_778231 XM_006715656 XP_006715719	inside intron	inside	31353	inside intron	30997	1	5	inside transcription region	-	350244
chr9	22134068	rs10811660	HbA1c	CDKN2B-AS1	NR_003529 NR_047532 NR_047533 NR_047534 NR_047535 NR_047536 NR_047537 NR_047538 NR_047539 NR_047540 NR_047541 NR_047542 NR_047543 NR_120536	downstream	downstream	20403	NA	NA	NA	3	NA	+	7428
chr9	22137685	rs7018475	HbA1c	CDKN2B-AS1	NR_003529 NR_047532 NR_047533 NR_047534 NR_047535 NR_047536 NR_047537 NR_047538 NR_047539 NR_047540 NR_047541 NR_047542 NR_047543 NR_120536	downstream	downstream	24020	NA	NA	NA	3	NA	+	7428
chr7	120959154	rs2536196	Heel BMD	WNT16	NM_016087 NM_057168 NP_057171 NP_476509	upstream	upstream	6266	NA	NA	NA	4	NA	+	15737
chr11	61614426	11:61614426_CT_C	LDL	FADS2	NM_001281501 NM_001281502 NM_004265 NP_001268430 NP_001268431 NP_004256	inside intron	inside	18713	inside intron	1203	5	12	inside transcription region	+	39112
chr11	116586283	rs7350481	LDL	BUD13	NM_001159736 NM_032725 NP_001153208 NP_116114 XM_011543035 XP_011541337	downstream	downstream	57430	NA	NA	NA	10	NA	-	24828
chr11	116648917	rs964184	LDL	ZPR1	NM_001317086 NM_003904 NP_001304015 NP_003895 XR_001748023	downstream	downstream	9821	NA	NA	NA	14	NA	-	9463
chr11	116652423	rs6589566	LDL	ZPR1	NM_001317086 NM_003904 NP_001304015 NP_003895 XR_001748023	inside intron	inside	6315	inside intron	449	12	14	inside transcription region	-	9463
chr11	116663707	rs662799	LDL	APOA5	NM_001166598 NM_001371904 NM_052968 NP_001160070 NP_001358833 NP_443200	promoter	promoter	571	NA	NA	NA	2	NA	-	2416
chr16	56987765	rs56228609	LDL	CETP	NM_000078 NM_001286085 NP_000069 NP_001273014 XM_006721124 XP_006721187	upstream	upstream	8069	NA	NA	NA	15	NA	+	21921
chr16	72108093	rs2000999	LDL	TXNL4B	NM_001142317 NM_001142318 NM_001324354 NM_001324355 NM_017853 NP_001135789 NP_001135790 NP_001311283 NP_001311284 NP_060323 XM_017023377 XP_016878866	inside intron	inside	19445	inside intron	14791	3	6	inside transcription region	-	55538
chr19	11202306	rs6511720	LDL	LDLR	NM_000527 NM_001195798 NM_001195799 NM_001195800 NM_001195802 NM_001195803 NP_000518 NP_001182727 NP_001182728 NP_001182729 NP_001182732 XM_011528010 XP_011526312 XR_001753685 XR_001753686	inside intron	inside	1031	inside intron	-710	1	18	5' UTR	+	43230
chr19	11216617	rs10422256	LDL	LDLR	NM_000527 NM_001195798 NM_001195799 NM_001195800 NM_001195802 NM_001195803 NP_000518 NP_001182727 NP_001182728 NP_001182729 NP_001182732 XM_011528010 XP_011526312 XR_001753685 XR_001753686	inside intron	inside	15342	inside intron	-340	4	18	5' UTR	+	43230
chr19	19370340	rs756350040	LDL	HAPLN4	NM_023002 NP_075378	inside intron	inside	13733	inside intron	-675	11	12	inside transcription region	-	17622
chr19	45220896	rs11881756	LDL	CEACAM16	NM_001039213 NP_001034302 XM_017026795 XP_016882284	downstream	downstream	18475	NA	NA	NA	7	NA	+	11565
chr19	45233385	rs62117161	LDL	BCL3	NM_005178 NP_005169 XM_011527197 XM_011527198 XM_011527200 XM_017027109 XM_017027110 XP_011525499 XP_011525500 XP_011525502 XP_016882598 XP_016882599	upstream	upstream	18592	NA	NA	NA	9	NA	+	11323
chr19	45242740	rs2927439	LDL	BCL3	NM_005178 NP_005169 XM_011527197 XM_011527198 XM_011527200 XM_017027109 XM_017027110 XP_011525499 XP_011525500 XP_011525502 XP_016882598 XP_016882599	upstream	upstream	9237	NA	NA	NA	9	NA	+	11323
chr19	45247048	rs4803748	LDL	BCL3	NM_005178 NP_005169 XM_011527197 XM_011527198 XM_011527200 XM_017027109 XM_017027110 XP_011525499 XP_011525500 XP_011525502 XP_016882598 XP_016882599	upstream	upstream	4929	NA	NA	NA	9	NA	+	11323
chr19	45253491	rs10401176	LDL	BCL3	NM_005178 NP_005169 XM_011527197 XM_011527198 XM_011527200 XM_017027109 XM_017027110 XP_011525499 XP_011525500 XP_011525502 XP_016882598 XP_016882599	inside intron	inside	1513	inside intron	991	2	9	inside transcription region	+	11323
chr19	45373565	rs395908	LDL	NECTIN2	NM_001042724 NM_002856 NP_001036189 NP_002847	inside intron	inside	24172	inside intron	1543	3	9	inside transcription region	+	43092
chr19	45377334	rs393584	LDL	NECTIN2	NM_001042724 NM_002856 NP_001036189 NP_002847	inside intron	inside	27941	inside intron	-43	4	9	inside transcription region	+	43092
chr19	45382034	rs6859	LDL	NECTIN2	NM_001042724 NM_002856 NP_001036189 NP_002847	inside intron	inside	32641	inside intron	3432	6	9	inside transcription region	+	43092
chr19	45392254	rs6857	LDL	NECTIN2	NM_001042724 NM_002856 NP_001036189 NP_002847	inside exon	inside	42861	inside exon	0	9	9	3'UTR	+	43092
chr19	45395266	rs157580	LDL	TOMM40	NM_001128916 NM_001128917 NM_006114 NP_001122388 NP_001122389 NP_006105 XM_005258411 XP_005258468	inside intron	inside	789	inside intron	-319	1	9	inside transcription region	+	12469
chr19	45396665	rs59007384	LDL	TOMM40	NM_001128916 NM_001128917 NM_006114 NP_001122388 NP_001122389 NP_006105 XM_005258411 XP_005258468	inside intron	inside	2188	inside intron	370	4	9	inside transcription region	+	12469
chr19	45398633	rs11668327	LDL	TOMM40	NM_001128916 NM_001128917 NM_006114 NP_001122388 NP_001122389 NP_006105 XM_005258411 XP_005258468	inside intron	inside	4156	inside intron	-1309	5	9	inside transcription region	+	12469
chr19	45408836	rs405509	LDL	APOE	NM_000041 NM_001302688 NM_001302689 NM_001302690 NM_001302691 NP_000032 NP_001289617 NP_001289618 NP_001289619 NP_001289620	promoter	promoter	202	NA	NA	NA	4	NA	+	3611
chr19	45411941	rs429358	LDL	APOE	NM_000041 NM_001302688 NM_001302689 NM_001302690 NM_001302691 NP_000032 NP_001289617 NP_001289618 NP_001289619 NP_001289620	inside exon	inside	2902	inside exon	0	4	4	inside transcription region	+	3611
chr19	45413233	rs1065853	LDL	APOE	NM_000041 NM_001302688 NM_001302689 NM_001302690 NM_001302691 NP_000032 NP_001289617 NP_001289618 NP_001289619 NP_001289620	downstream	downstream	4194	NA	NA	NA	4	NA	+	3611
chr19	45414451	rs439401	LDL	APOE	NM_000041 NM_001302688 NM_001302689 NM_001302690 NM_001302691 NP_000032 NP_001289617 NP_001289618 NP_001289619 NP_001289620	downstream	downstream	5412	NA	NA	NA	4	NA	+	3611
chr19	45421254	rs12721046	LDL	APOC1	NM_001321065 NM_001321066 NM_001379687 NM_001645 NP_001307994 NP_001307995 NP_001366616 NP_001636	inside intron	inside	1820	inside intron	1174	2	2	inside transcription region	+	3172
chr19	45425460	rs157595	LDL	APOC1	NM_001321065 NM_001321066 NM_001379687 NM_001645 NP_001307994 NP_001307995 NP_001366616 NP_001636	downstream	downstream	6026	NA	NA	NA	2	NA	+	3172
chr19	45429708	rs60049679	LDL	APOC1P1	NR_028412 NR_028413 NR_028414	promoter	promoter	351	NA	NA	NA	3	NA	+	4583
chr19	45431453	rs114448690	LDL	APOC1P1	NR_028412 NR_028413 NR_028414	inside intron	inside	1393	inside intron	-265	2	3	inside transcription region	+	4583
chr19	45436247	rs7246100	LDL	APOC1P1	NR_028412 NR_028413 NR_028414	downstream	downstream	6187	NA	NA	NA	3	NA	+	4583
chr19	49218602	rs12979278	LDL	MAMSTR	NM_001130915 NM_001297753 NM_182574 NP_001124387 NP_001284682 NP_872380 XM_011526807 XM_011526808 XM_011526809 XM_017026640 XM_017026641 XM_017026643 XM_017026644 XM_024451461 XM_024451462 XM_024451463 XP_011525109 XP_011525110 XP_011525111 XP_016882129 XP_016882130 XP_016882132 XP_016882133 XP_024307229 XP_024307230 XP_024307231	inside exon	inside	4373	inside exon	0	5	10	inside transcription region	-	6721
chr1	55491780	rs200159426	LDL	PCSK9	NM_174936 NP_777596 NR_110451	upstream	upstream	13368	NA	NA	NA	12	NA	+	25377
chr1	55521109	rs693668	LDL	PCSK9	NM_174936 NP_777596 NR_110451	inside intron	inside	15214	inside intron	555	4	10	inside transcription region	+	24631
chr1	63153953	rs4344355	LDL	DOCK7	NM_001271999 NM_001272000 NM_001272001 NM_001272002 NM_001330614 NM_001367561 NM_033407 NP_001258928 NP_001258929 NP_001258930 NP_001258931 NP_001317543 NP_001354490 NP_212132 XM_011542327 XM_011542328 XM_011542330 XM_017002639 XM_017002640 XP_011540629 XP_011540630 XP_011540632 XP_016858128 XP_016858129	inside exon	inside	85	inside exon	0	1	16	5' UTR	-	104263
chr1	109817590	rs12740374	LDL	CELSR2	NM_001408 NP_001399	inside exon	inside	24949	inside exon	0	34	34	3'UTR	+	25737
chr20	17844684	rs2618566	LDL	SNX5	NM_001282454 NM_014426 NM_152227 NP_001269383 NP_055241 NP_689413	downstream	downstream	104805	NA	NA	NA	13	NA	-	27246
chr2	21266774	2:21266774_GGCAGCGCCA_G	LDL	APOB	NM_000384 NP_000375	inside exon	inside	170	inside exon	0	1	29	inside transcription region	-	42644
chr2	21288226	rs563290	LDL	APOB	NM_000384 NP_000375	upstream	upstream	21281	NA	NA	NA	29	NA	-	42644
chr2	27598097	rs4665972	LDL	SNX17	NM_001267059 NM_001267060 NM_001267061 NM_014748 NP_001253988 NP_001253989 NP_001253990 NP_055563 NR_049782 NR_049783 NR_049784 NR_049785 NR_049786 NR_049787 NR_049788 XM_011533203 XM_017005405 XP_011531505 XP_016860894	inside intron	inside	3977	inside intron	-76	9	15	inside transcription region	+	6280
chr2	44015928	rs3792023	LDL	DYNC2LI1	NM_001012665 NM_001193464 NM_001348912 NM_001348913 NM_015522 NM_016008 NP_001180393 NP_001335841 NP_001335842 NP_056337 NP_057092	inside intron	inside	12007	inside intron	842	4	11	5' UTR	+	28773
chr2	44069772	rs75331444	LDL	ABCG8	NM_001357321 NM_022437 NP_001344250 NP_071882 XM_011533029 XM_011533030 XP_011531331 XP_011531332 XR_001738891 XR_939707	inside intron	inside	3669	inside intron	1872	2	13	inside transcription region	+	39502
chr2	44072576	rs4299376	LDL	ABCG8	NM_001357321 NM_022437 NP_001344250 NP_071882 XM_011533029 XM_011533030 XP_011531331 XP_011531332 XR_001738891 XR_939707	inside intron	inside	6473	inside intron	716	3	13	inside transcription region	+	39502
chr5	74636484	rs10045497	LDL	HMGCR	NM_000859 NM_001130996 NM_001364187 NP_000850 NP_001124468 NP_001351116 XM_011543357 XM_011543358 XM_011543359 XP_011541659 XP_011541660 XP_011541661	inside intron	inside	3491	inside intron	1922	2	19	5' UTR	+	24933
chr5	156373637	rs13167071	LDL	TIMD4	NM_001146726 NM_138379 NP_001140198 NP_612388 XM_011534694 XM_017010021 XP_011532996 XP_016865510	inside intron	inside	16628	inside intron	3023	4	8	inside transcription region	-	43973
chr6	16126934	rs7746081	LDL	MYLIP	NM_013262 NP_037394 XM_005249032 XM_005249033 XM_017010789 XP_005249089 XP_005249090 XP_016866278	promoter	promoter	2382	NA	NA	NA	6	NA	+	19161
chr6	26072992	rs144861591	LDL	HFE	NM_000410 NM_001300749 NM_001384164 NM_139002 NM_139003 NM_139004 NM_139005 NM_139006 NM_139007 NM_139008 NM_139009 NM_139010 NM_139011 NP_000401 NP_001287678 NP_001371093 NP_620572 NP_620573 NP_620575 NP_620576 NP_620577 NP_620578 NP_620579 NP_620580 XR_241893	upstream	upstream	14516	NA	NA	NA	7	NA	+	7960
chr6	32585055	rs686250	LDL	HLA-DQA1	NM_002122 NP_002113 XM_006715079 XP_006715142	upstream	upstream	20127	NA	NA	NA	3	NA	+	9656
chr7	44581986	rs17725246	LDL	NPC1L1	NM_001101648 NM_001300967 NM_013389 NP_001095118 NP_001287896 NP_037521 XM_011515326 XM_011515328 XP_011513628 XP_011513630 XR_002956423	promoter	promoter	1072	NA	NA	NA	7	NA	-	8088
chr8	19824492	rs13702	LDL	LPL	NM_000237 NP_000228	inside exon	inside	27910	inside exon	0	10	10	3'UTR	+	28188
chr8	126482077	rs2954021	LDL	TRIB1	NM_001282985 NM_025195 NP_001269914 NP_079471 XR_428373	downstream	downstream	36134	NA	NA	NA	2	NA	+	4701
chr9	136149709	9:136149709_AC_A	LDL	ABO	NM_020469 NP_065202	inside intron	inside	920	inside intron	867	1	6	5' UTR	-	20067
chr12	111884608	rs3184504	Platelet	SH2B3	NM_001291424 NM_005475 NP_001278353 NP_005466 XM_005253818 XM_005253819 XM_006719180 XM_011537719 XM_011537720 XM_011537721 XM_024448790 XP_005253875 XP_005253876 XP_006719243 XP_011536021 XP_011536022 XP_011536023 XP_024304558 XR_001748535 XR_001748536 XR_002957278	inside exon	inside	11942	inside exon	0	2	7	inside transcription region	+	16761
chr12	122216910	rs11553699	Platelet	RHOF	NM_019034 NP_061907	inside exon	inside	14683	inside exon	0	5	5	3'UTR	-	15934
chr18	20720973	rs11082304	Platelet	CABLES1	NM_001100619 NM_001256438 NM_138375 NP_001094089 NP_001243367 NP_612384 NR_023359	inside intron	inside	5246	inside intron	-4401	1	10	inside transcription region	+	124707
chr3	56849749	rs1354034	Platelet	ARHGEF3	NM_001128615 NM_001128616 NM_001289698 NM_001377407 NM_001377408 NM_001377409 NM_001377410 NM_001377411 NM_001377412 NM_001377413 NM_001377414 NM_001377415 NM_019555 NP_001122087 NP_001122088 NP_001276627 NP_001364336 NP_001364337 NP_001364338 NP_001364339 NP_001364340 NP_001364341 NP_001364342 NP_001364343 NP_001364344 NP_062455 XM_005265186 XM_011533764 XM_011533767 XM_017006503 XM_017006504 XP…	inside intron	inside	263586	inside intron	-41904	5	13	inside transcription region	-	351890
chr5	1285974	rs7705526	Platelet	TERT	NM_001193376 NM_198253 NM_198254 NM_198255 NP_001180305 NP_937983 NR_149162 NR_149163	inside intron	inside	9187	inside intron	-3234	2	5	5' UTR	-	16406
chr5	88180196	rs114694170	Platelet	MEF2C	NM_001131005 NM_001193347 NM_001193348 NM_001193349 NM_001193350 NM_001308002 NM_001363581 NM_001364329 NM_001364330 NM_001364331 NM_001364332 NM_001364333 NM_001364334 NM_001364335 NM_001364336 NM_001364337 NM_001364338 NM_001364339 NM_001364340 NM_001364341 NM_001364342 NM_001364343 NM_001364344 NM_001364345 NM_001364346 NM_001364347 NM_001364348 NM_001364349 NM_001364350 NM_001364352 NM_001364…	inside intron	inside	19725	inside intron	3121	2	11	5' UTR	-	185864
chr6	33545125	rs5745587	Platelet	BAK1	NM_001188 NP_001179 XM_011514779 XM_011514780 XP_011513081 XP_011513082	inside intron	inside	2944	inside intron	185	3	7	inside transcription region	-	7747
chr6	135402339	rs9399136	Platelet	HBS1L	NM_001145158 NM_001145207 NM_001363686 NM_006620 NP_001138630 NP_001138679 NP_001350615 NP_006611 XM_017010192 XP_016865681 XR_002956256 XR_002956257 XR_245499	upstream	upstream	26303	NA	NA	NA	5	NA	-	19041
chr9	4745645	rs692502	Platelet	AK3	NM_001199852 NM_001199853 NM_001199854 NM_001199855 NM_001199856 NM_016282 NP_001186781 NP_001186782 NP_001186784 NP_001186785 NP_057366	upstream	upstream	3602	NA	NA	NA	5	NA	-	32486
chr1	228154265	rs112895549	SBP	WNT9A	NM_003395 NP_003386 XM_011544271 XP_011542573	upstream	upstream	18589	NA	NA	NA	4	NA	-	26511
chr10	65104500	rs7896518	Triglycerides	JMJD1C	NM_001282948 NM_001318153 NM_001318154 NM_001322252 NM_001322254 NM_001322258 NM_004241 NM_032776 NP_001269877 NP_001305082 NP_001305083 NP_001309181 NP_001309183 NP_001309187 NP_116165 NR_134512 XM_011539503 XM_011539508 XM_017015897 XM_017015898 XM_017015899 XM_017015900 XM_017015901 XM_017015902 XM_017015903 XM_024447882 XM_024447883 XP_011537805 XP_011537810 XP_016871386 XP_016871387 XP_01687…	inside intron	inside	121221	inside intron	35576	2	26	inside transcription region	-	298734
chr10	94839724	rs4418728	Triglycerides	CYP26A1	NM_000783 NM_057157 NP_000774 NP_476498	downstream	downstream	6077	NA	NA	NA	7	NA	+	3994
chr11	61557803	rs102275	Triglycerides	TMEM258	NM_014206 NP_055021	inside intron	inside	2281	inside intron	160	2	4	inside transcription region	-	3483
chr11	116379978	rs1508103	Triglycerides	BUD13	NM_001159736 NM_032725 NP_001153208 NP_116114 XM_011543035 XP_011541337	downstream	downstream	263735	NA	NA	NA	10	NA	-	24828
chr11	116526032	11:116526032_CCT_C	Triglycerides	BUD13	NM_001159736 NM_032725 NP_001153208 NP_116114 XM_011543035 XP_011541337	downstream	downstream	117681	NA	NA	NA	10	NA	-	24828
chr11	116583685	rs74849419	Triglycerides	BUD13	NM_001159736 NM_032725 NP_001153208 NP_116114 XM_011543035 XP_011541337	downstream	downstream	60028	NA	NA	NA	10	NA	-	24828
chr11	116610249	rs10466588	Triglycerides	BUD13	NM_001159736 NM_032725 NP_001153208 NP_116114 XM_011543035 XP_011541337	downstream	downstream	33464	NA	NA	NA	10	NA	-	24828
chr11	116611827	rs180349	Triglycerides	BUD13	NM_001159736 NM_032725 NP_001153208 NP_116114 XM_011543035 XP_011541337	downstream	downstream	31886	NA	NA	NA	10	NA	-	24828
chr11	116639730	11:116639730_CA_C	Triglycerides	BUD13	NM_001159736 NM_032725 NP_001153208 NP_116114 XM_011543035 XP_011541337	inside intron	inside	3983	inside intron	1113	2	5	inside transcription region	-	12547
chr11	116660686	rs2266788	Triglycerides	APOA5	NM_001166598 NM_001371904 NM_052968 NP_001160070 NP_001358833 NP_443200	inside exon	inside	2449	inside exon	0	4	4	3'UTR	-	3050
chr11	116661826	rs2072560	Triglycerides	APOA5	NM_001166598 NM_001371904 NM_052968 NP_001160070 NP_001358833 NP_443200	inside exon	inside	1309	inside exon	0	2	2	inside transcription region	-	2416
chr11	116662331	rs12287066	Triglycerides	APOA5	NM_001166598 NM_001371904 NM_052968 NP_001160070 NP_001358833 NP_443200	inside exon	inside	804	inside exon	0	2	2	5' UTR	-	2416
chr11	116670738	rs6589568	Triglycerides	APOA5	NM_001166598 NM_001371904 NM_052968 NP_001160070 NP_001358833 NP_443200	upstream	upstream	7602	NA	NA	NA	2	NA	-	2416
chr11	116773378	rs11216180	Triglycerides	SIK3	NM_001281748 NM_001281749 NM_001366686 NM_001366687 NM_025164 NP_001268677 NP_001268678 NP_001353615 NP_001353616 NP_079440 XM_005271482 XM_005271484 XM_005271485 XM_011542722 XM_011542723 XM_011542724 XM_011542725 XM_011542726 XM_017017424 XM_017017425 XM_017017426 XM_017017427 XP_005271539 XP_005271541 XP_005271542 XP_011541024 XP_011541025 XP_011541026 XP_011541027 XP_011541028 XP_016872913 XP…	inside intron	inside	195614	inside intron	-5344	5	24	inside transcription region	-	254875
chr16	56988044	rs173539	Triglycerides	CETP	NM_000078 NM_001286085 NP_000069 NP_001273014 XM_006721124 XP_006721187	upstream	upstream	7790	NA	NA	NA	15	NA	+	21921
chr16	81524274	rs12443634	Triglycerides	CMIP	NM_030629 NM_198390 NP_085132 NP_938204 XM_005256179 XM_005256181 XM_005256182 XM_011523352 XM_011523353 XM_017023733 XP_005256236 XP_005256238 XP_005256239 XP_011521654 XP_011521655 XP_016879222	inside intron	inside	45499	inside intron	-45127	1	21	inside transcription region	+	266592
chr17	41912853	rs377227476	Triglycerides	MPP3	NM_001330233 NM_001353080 NM_001932 NP_001317162 NP_001340009 NP_001923 NR_003562 NR_148342 NR_148343 NR_148344 NR_148345 XM_006721915 XM_006721916 XM_017024655 XM_017024656 XM_017024657 XM_017024658 XM_017024659 XM_017024660 XP_006721978 XP_006721979 XP_016880144 XP_016880145 XP_016880146 XP_016880147 XP_016880148 XP_016880149 XR_001752512 XR_001752515 XR_001752516 XR_001752517 XR_002958011 XR_9…	promoter	promoter	2306	NA	NA	NA	6	NA	-	3464
chr19	19379549	rs58542926	Triglycerides	TM6SF2	NM_001001524 NM_203510 NP_001001524	inside exon	inside	4524	inside exon	0	6	10	inside transcription region	-	8900
chr19	45416741	rs438811	Triglycerides	APOC1	NM_001321065 NM_001321066 NM_001379687 NM_001645 NP_001307994 NP_001307995 NP_001366616 NP_001636	promoter	promoter	835	NA	NA	NA	4	NA	+	5029
chr19	45430280	rs5112	Triglycerides	APOC1P1	NR_028412 NR_028413 NR_028414	inside exon	inside	220	inside exon	0	1	3	inside transcription region	+	4583
chr1	62929378	1:62929378_TA_T	Triglycerides	DOCK7	NM_001271999 NM_001272000 NM_001272001 NM_001272002 NM_001330614 NM_001367561 NM_033407 NP_001258928 NP_001258929 NP_001258930 NP_001258931 NP_001317543 NP_001354490 NP_212132 XM_011542327 XM_011542328 XM_011542330 XM_017002639 XM_017002640 XP_011540629 XP_011540630 XP_011540632 XP_016858128 XP_016858129	inside intron	inside	71924	inside intron	-6001	20	20	inside transcription region	-	78094
chr1	230295076	rs764992666	Triglycerides	GALNT2	NM_001291866 NM_004481 NP_001278795 NP_004472 NR_120373 XM_017000963 XM_017000964 XM_017000965 XM_017000966 XP_016856452 XP_016856453 XP_016856454 XP_016856455	inside intron	inside	92120	inside intron	18886	2	16	inside transcription region	+	214919
chr20	44551855	rs6073958	Triglycerides	PLTP	NM_001242920 NM_001242921 NM_006227 NM_182676 NP_001229849 NP_001229850 NP_006218 NP_872617	upstream	upstream	10852	NA	NA	NA	14	NA	-	13744
chr22	38598234	rs2267372	Triglycerides	MAFF	NM_001161572 NM_001161573 NM_001161574 NM_012323 NM_152878 NP_001155044 NP_001155045 NP_001155046 NP_036455	inside intron	inside	295	inside intron	-14	1	2	5' UTR	+	14578
chr22	44340904	rs2294915	Triglycerides	PNPLA3	NM_025225 NP_079501	inside intron	inside	21285	inside intron	-228	8	10	inside transcription region	+	40814
chr2	21237544	rs673548	Triglycerides	APOB	NM_000384 NP_000375	inside intron	inside	29400	inside intron	-78	24	29	inside transcription region	-	42644
chr2	27730940	rs1260326	Triglycerides	GCKR	NM_001486 NP_001477 XM_011532763 XM_017003796 XM_017003797 XP_011531065 XP_016859285 XP_016859286 XR_001738699	inside exon	inside	11234	inside exon	0	14	18	inside transcription region	+	26844
chr2	227159867	rs2673140	Triglycerides	LOC646736	NR_046102	downstream	downstream	152357	NA	NA	NA	7	NA	+	37268
chr4	87976359	rs1471251	Triglycerides	AFF1	NM_001166693 NM_001313959 NM_001313960 NM_005935 NP_001160165 NP_001300888 NP_001300889 NP_005926 XM_005263007 XM_005263009 XM_005263011 XM_005263013 XM_011531973 XM_017008215 XM_017008216 XP_005263064 XP_005263066 XP_005263068 XP_005263070 XP_011530275 XP_016863704 XP_016863705	inside intron	inside	48206	inside intron	28911	2	18	5' UTR	+	134053
chr5	55804552	rs40270	Triglycerides	ANKRD55	NM_001039935 NM_024669 NP_078945 XM_011543646 XM_017009852 XM_017009853 XM_017009854 XP_011541948 XP_016865341 XP_016865342 XP_016865343	upstream	upstream	275366	NA	NA	NA	12	NA	-	133679
chr5	55868097	rs13179413	Triglycerides	MAP3K1	NM_005921 NP_005912 XM_017009484 XM_017009485 XP_016864973 XP_016864974 XR_001742068	upstream	upstream	242802	NA	NA	NA	20	NA	+	81078
chr5	118728256	rs7720409	Triglycerides	TNFAIP8	NM_001077654 NM_001286813 NM_001286814 NM_001286815 NM_001286817 NM_014350 NP_001071122 NP_001273742 NP_001273743 NP_001273744 NP_001273746 NP_055165 XM_017009327 XM_017009328 XP_016864816 XP_016864817	inside intron	inside	36660	inside intron	253	2	2	inside transcription region	+	38698
chr5	156373637	rs13167071	Triglycerides	TIMD4	NM_001146726 NM_138379 NP_001140198 NP_612388 XM_011534694 XM_017010021 XP_011532996 XP_016865510	inside intron	inside	16628	inside intron	3023	4	8	inside transcription region	-	43973
chr6	31326289	rs9378248	Triglycerides	HLA-B	NM_005514 NP_005505	promoter	promoter	1300	NA	NA	NA	8	NA	-	3340
chr6	43757082	rs4711750	Triglycerides	VEGFA	NM_001025366 NM_001025367 NM_001025368 NM_001025369 NM_001025370 NM_001033756 NM_001171622 NM_001171623 NM_001171624 NM_001171625 NM_001171626 NM_001171627 NM_001171628 NM_001171629 NM_001171630 NM_001204384 NM_001204385 NM_001287044 NM_001317010 NM_003376 NP_001020537 NP_001020538 NP_001020539 NP_001020540 NP_001020541 NP_001028928 NP_001165093 NP_001165094 NP_001165095 NP_001165096 NP_001165097…	downstream	downstream	11622	NA	NA	NA	3	NA	+	8763
chr6	52629980	rs6458867	Triglycerides	GSTA2	NM_000846 NP_000837 XM_011514532 XP_011512834	promoter	promoter	1619	NA	NA	NA	7	NA	-	13476
chr6	139842576	rs4052908	Triglycerides	LINC01625	NR_033919	upstream	upstream	46843	NA	NA	NA	4	NA	-	5601
chr6	161071982	rs12212507	Triglycerides	LPA	NM_005577 NP_005568	inside intron	inside	15424	inside intron	-452	3	40	inside transcription region	-	134892
chr6	161092438	rs11751347	Triglycerides	LPA	NM_005577 NP_005568	upstream	upstream	5031	NA	NA	NA	40	NA	-	134892
chr7	73025975	rs13234131	Triglycerides	MLXIPL	NM_032951 NM_032952 NM_032953 NM_032954 NM_032994 NP_116569 NP_116570 NP_116571 NP_116572 NR_134541 XM_011516277 XM_011516278 XM_011516279 XM_011516281 XM_017012263 XM_024446784 XP_011514579 XP_011514580 XP_011514581 XP_011514583 XP_016867752 XP_024302552 XR_001744799	inside intron	inside	12894	inside intron	-3972	3	15	inside transcription region	-	31338
chr7	73111504	rs4717804	Triglycerides	BUD23	NM_001202560 NM_017528 NP_001189489 NP_059998 NR_037776 NR_045512 XM_006715847 XM_011515778 XM_011515779 XP_006715910 XP_011514080 XP_011514081 XR_002956407	inside intron	inside	13606	inside intron	429	9	10	inside transcription region	+	21593
chr7	130445428	rs35363532	Triglycerides	KLF14	NM_138693 NP_619638	upstream	upstream	26540	NA	NA	NA	1	NA	-	1492
chr8	10643164	rs9657541	Triglycerides	SOX7	NM_031439 NP_113627	inside intron	inside	54134	inside intron	40496	5	6	inside transcription region	-	116021
chr8	18272377	rs4921913	Triglycerides	NAT2	NM_000015 NP_000006 XM_017012938 XP_016868427	downstream	downstream	23622	NA	NA	NA	2	NA	+	9968
chr8	19820916	rs117199990	Triglycerides	LPL	NM_000237 NP_000228	inside intron	inside	24334	inside intron	-1185	9	10	inside transcription region	+	28188
chr8	19834840	rs34150554	Triglycerides	LPL	NM_000237 NP_000228	downstream	downstream	38258	NA	NA	NA	10	NA	+	28188
chr8	19875408	rs6586886	Triglycerides	LPL	NM_000237 NP_000228	downstream	downstream	78826	NA	NA	NA	10	NA	+	28188
chr8	19936687	rs28597716	Triglycerides	SLC18A1	NM_001135691 NM_001142324 NM_001142325 NM_003053 NP_001129163 NP_001135796 NP_001135797 NP_003044 XM_011544625 XM_011544626 XP_011542927 XP_011542928	downstream	downstream	104029	NA	NA	NA	16	NA	-	38351
chr8	59464692	rs10113750	Triglycerides	SDCBP	NM_001007067 NM_001007068 NM_001007069 NM_001007070 NM_001330537 NM_001348339 NM_001348340 NM_001348341 NM_005625 NP_001007068 NP_001007069 NP_001007070 NP_001007071 NP_001317466 NP_001335268 NP_001335269 NP_001335270 NP_005616 XM_024447229 XM_024447230 XM_024447231 XP_024302997 XP_024302998 XP_024302999	promoter	promoter	1035	NA	NA	NA	8	NA	+	29691
chr8	126500031	rs28601761	Triglycerides	TRIB1	NM_001282985 NM_025195 NP_001269914 NP_079471 XR_428373	downstream	downstream	54088	NA	NA	NA	2	NA	+	4701
chr8	126507389	rs2954038	Triglycerides	TRIB1	NM_001282985 NM_025195 NP_001269914 NP_079471 XR_428373	downstream	downstream	61446	NA	NA	NA	2	NA	+	4701
chr11	14690192	rs12283049	Vitamin D	PDE3B	NM_000922 NM_001363569 NM_001363570 NP_000913 NP_001350498 NP_001350499 XM_006718249 XM_017017911 XM_017017912 XP_006718312 XP_016873400 XP_016873401 XR_001747903	inside intron	inside	24923	inside intron	-23592	1	16	inside transcription region	+	228335
chr14	39552484	rs2144530	Vitamin D	SEC23A	NM_006364 NP_006355 XM_005267262 XM_011536355 XM_017020928 XP_005267319 XP_011534657 XP_016876417	inside intron	inside	8432	inside intron	2480	3	10	inside transcription region	-	36514
chr15	58678512	rs10468017	Vitamin D	LIPC	NM_000236 NP_000227 XM_005254372 XM_005254374 XM_006720502 XM_017022176 XM_024449916 XM_024449917 XP_005254429 XP_005254431 XP_006720565 XP_016877665 XP_024305684 XP_024305685	upstream	upstream	24262	NA	NA	NA	11	NA	+	158298
chr19	48384626	rs10425963	Vitamin D	SULT2A1	NM_003167 NP_003158	inside intron	inside	5027	inside intron	713	3	6	inside transcription region	-	15931
chr1	2326812	rs903911	Vitamin D	RER1	NM_007033 NP_008964	inside intron	inside	3598	inside intron	409	2	7	5' UTR	+	13671
chr22	43285378	rs137896944	Vitamin D	PACSIN2	NM_001184970 NM_001184971 NM_001349968 NM_001349969 NM_001349970 NM_001349971 NM_001349972 NM_001349973 NM_001349974 NM_007229 NP_001171899 NP_001171900 NP_001336897 NP_001336898 NP_001336899 NP_001336900 NP_001336901 NP_001336902 NP_001336903 NP_009160	inside intron	inside	125805	inside intron	-573	5	11	inside transcription region	-	145412
chr4	69964338	rs7439366	Vitamin D	UGT2B7	NM_001074 NM_001330719 NM_001349568 NP_001065 NP_001317648 NP_001336497	inside exon	inside	2145	inside exon	0	2	5	inside transcription region	+	16512
chr4	72615362	rs11723621	Vitamin D	GC	NM_000583 NM_001204306 NM_001204307 NP_000574 NP_001191235 NP_001191236 XM_006714177 XP_006714240	inside intron	inside	55874	inside intron	2871	12	14	inside transcription region	-	63826
chr7	75615006	rs1057868	Vitamin D	POR	NM_000941 NM_001367562 NM_001382655 NM_001382657 NM_001382658 NM_001382659 NM_001382662 NM_001395413 NP_000932 NP_001354491 NP_001369584 NP_001369586 NP_001369587 NP_001369588 NP_001369591 NP_001382342	inside exon	inside	3777	inside exon	0	7	10	inside transcription region	+	4944
chr8	59393273	rs4738684	Vitamin D	CYP7A1	NM_000780 NP_000771	downstream	downstream	19446	NA	NA	NA	6	NA	-	9983
