# Supplementary material for: Genetic determinants of polygenic prediction accuracy within a population
Source: Research Square preprint supplement (doi:10.21203/rs.3.rs-1157621/v1), 2022-01-13
Supplement: Supplementary file 3 [file 494842370f7ab42b2ead5e48.xlsx]

## Sheet: Bonferroni_PRS_effects
Trait	Effect	Effect Allele	Other Allele	Coefficient	Model
BMI	polygenic risk score	NA	NA	0.958943	baseline model
BMI	polygenic risk score	NA	NA	0.958808	model with complex effects
BMI	rs34891368 dominance effect - Effect Allele	C	T	-0.101076	model with complex effects
BMI	rs34891368 dominance effect - Other Allele	C	T	0.104731	model with complex effects
HbA1c	polygenic risk score	NA	NA	0.888359	baseline model
HbA1c	polygenic risk score	NA	NA	0.882598	model with complex effects
HbA1c	rs78025551 dominance effect - Other Allele	C	G	-0.145289	model with complex effects
HbA1c	rs4499538 dominance effect - Effect Allele	C	A	-1.03104	model with complex effects
HbA1c	rs147228463 dominance effect - Effect Allele	G	C	-1.43734	model with complex effects
HbA1c	rs9368222 dominance effect - Effect Allele	C	A	-0.321728	model with complex effects
HbA1c	rs9267922 dominance effect - Effect Allele	G	A	-0.198881	model with complex effects
HbA1c	rs9273367 dominance effect - Effect Allele	A	T	-0.394564	model with complex effects
HbA1c	rs9273367 dominance effect - Other Allele	A	T	-0.176936	model with complex effects
HbA1c	rs62397687 dominance effect - Effect Allele	C	T	-0.188821	model with complex effects
LDL	polygenic risk score	NA	NA	0.720531	baseline model
LDL	polygenic risk score	NA	NA	0.724565	model with complex effects
LDL	rs964184 dominance effect - Other Allele	C	G	0.0173884	model with complex effects
LDL	rs56228609 dominance effect - Effect Allele	C	T	0.0217972	model with complex effects
LDL	rs6511720 dominance effect - Other Allele	G	T	-0.0155316	model with complex effects
LDL	rs756350040 dominance effect - Effect Allele	TGACA	T	0.290459	model with complex effects
LDL	rs393584 dominance effect - Other Allele	G	A	0.0017544	model with complex effects
LDL	rs6859 dominance effect - Other Allele	G	A	-0.00732545	model with complex effects
LDL	rs6857 dominance effect - Effect Allele	C	T	0.0303743	model with complex effects
LDL	rs6857 dominance effect - Other Allele	C	T	-0.0418806	model with complex effects
LDL	rs157580 dominance effect - Effect Allele	A	G	0.0215594	model with complex effects
LDL	rs157580 dominance effect - Other Allele	A	G	-0.00478165	model with complex effects
LDL	rs59007384 dominance effect - Effect Allele	G	T	-0.0385096	model with complex effects
LDL	rs59007384 dominance effect - Other Allele	G	T	0.00807483	model with complex effects
LDL	rs11668327 dominance effect - Other Allele	G	C	0.00850926	model with complex effects
LDL	rs405509 dominance effect - Effect Allele	G	T	-0.0144126	model with complex effects
LDL	rs405509 dominance effect - Other Allele	G	T	0.0201997	model with complex effects
LDL	rs429358 dominance effect - Effect Allele	T	C	0.107352	model with complex effects
LDL	rs429358 dominance effect - Other Allele	T	C	-0.0651265	model with complex effects
LDL	rs1065853 dominance effect - Effect Allele	G	T	0.207963	model with complex effects
LDL	rs1065853 dominance effect - Other Allele	G	T	-0.0440233	model with complex effects
LDL	rs439401 dominance effect - Effect Allele	C	T	-0.0132668	model with complex effects
LDL	rs439401 dominance effect - Other Allele	C	T	-0.00489391	model with complex effects
LDL	rs12721046 dominance effect - Effect Allele	G	A	-0.0261829	model with complex effects
LDL	rs12721046 dominance effect - Other Allele	G	A	0.0166829	model with complex effects
LDL	rs157595 dominance effect - Effect Allele	G	A	-0.00786886	model with complex effects
LDL	rs157595 dominance effect - Other Allele	G	A	0.0203902	model with complex effects
LDL	rs60049679 dominance effect - Other Allele	G	C	0.000701684	model with complex effects
LDL	rs7246100 dominance effect - Effect Allele	T	C	0.0160947	model with complex effects
LDL	rs7246100 dominance effect - Other Allele	T	C	-0.0154645	model with complex effects
LDL	rs12979278 dominance effect - Other Allele	T	C	-0.0236608	model with complex effects
LDL	rs200159426 dominance effect - Effect Allele	A	G	0.0245028	model with complex effects
LDL	rs12740374 dominance effect - Effect Allele	G	T	0.0260219	model with complex effects
LDL	rs12740374 dominance effect - Other Allele	G	T	-0.0318518	model with complex effects
LDL	rs563290 dominance effect - Effect Allele	A	G	0.0399427	model with complex effects
LDL	rs563290 dominance effect - Other Allele	A	G	-0.0205577	model with complex effects
LDL	rs144861591 dominance effect - Effect Allele	C	T	0.190194	model with complex effects
LDL	rs13702 dominance effect - Effect Allele	T	C	0.0256313	model with complex effects
LDL	rs13702 dominance effect - Other Allele	T	C	-0.0124295	model with complex effects
LDL	rs2954021 dominance effect - Effect Allele	G	A	-0.0165289	model with complex effects
LDL	rs2954021 dominance effect - Other Allele	G	A	0.0158797	model with complex effects
LDL	9:136149709_AC_A dominance effect - Other Allele	AC	A	0.0199466	model with complex effects
TG	polygenic risk score	NA	NA	0.544286	baseline model
TG	polygenic risk score	NA	NA	0.652018	model with complex effects
TG	rs7896518 dominance effect - Effect Allele	A	G	0.0130642	model with complex effects
TG	rs7896518 dominance effect - Other Allele	A	G	-0.0261699	model with complex effects
TG	rs4418728 dominance effect - Other Allele	G	T	-0.0199918	model with complex effects
TG	rs102275 dominance effect - Effect Allele	T	C	-0.0213663	model with complex effects
TG	rs102275 dominance effect - Other Allele	T	C	0.0123416	model with complex effects
TG	11:116526032_CCT_C dominance effect - Effect Allele	CCT	C	0.0836365	model with complex effects
TG	11:116526032_CCT_C dominance effect - Other Allele	CCT	C	-0.0203307	model with complex effects
TG	rs74849419 dominance effect - Effect Allele	G	A	0.0791829	model with complex effects
TG	rs74849419 dominance effect - Other Allele	G	A	-0.0602995	model with complex effects
TG	rs10466588 dominance effect - Effect Allele	A	G	-0.0971601	model with complex effects
TG	rs10466588 dominance effect - Other Allele	A	G	0.022126	model with complex effects
TG	11:116639730_CA_C dominance effect - Effect Allele	CA	C	-0.0193987	model with complex effects
TG	11:116639730_CA_C dominance effect - Other Allele	CA	C	0.0166036	model with complex effects
TG	rs2266788 dominance effect - Other Allele	A	G	-0.065147	model with complex effects
TG	rs2072560 dominance effect - Other Allele	C	T	-0.121577	model with complex effects
TG	rs12287066 dominance effect - Effect Allele	G	T	0.185312	model with complex effects
TG	rs12287066 dominance effect - Other Allele	G	T	-0.162551	model with complex effects
TG	rs6589568 dominance effect - Effect Allele	A	G	0.0241026	model with complex effects
TG	rs6589568 dominance effect - Other Allele	A	G	-0.0251534	model with complex effects
TG	rs11216180 dominance effect - Effect Allele	A	T	0.0775765	model with complex effects
TG	rs11216180 dominance effect - Other Allele	A	T	-0.0803194	model with complex effects
TG	rs173539 dominance effect - Effect Allele	C	T	0.0164597	model with complex effects
TG	rs173539 dominance effect - Other Allele	C	T	-0.00998034	model with complex effects
TG	rs12443634 dominance effect - Other Allele	C	A	0.0197726	model with complex effects
TG	rs58542926 dominance effect - Effect Allele	C	T	0.183614	model with complex effects
TG	rs58542926 dominance effect - Other Allele	C	T	-0.0281695	model with complex effects
TG	1:62929378_TA_T dominance effect - Effect Allele	TA	T	0.044925	model with complex effects
TG	1:62929378_TA_T dominance effect - Other Allele	TA	T	-0.0221788	model with complex effects
TG	rs764992666 dominance effect - Effect Allele	T	TCTTAAAGTGTTCAGCACTCCC	-0.0184271	model with complex effects
TG	rs764992666 dominance effect - Other Allele	T	TCTTAAAGTGTTCAGCACTCCC	0.0101555	model with complex effects
TG	rs6073958 dominance effect - Other Allele	T	C	0.0253497	model with complex effects
TG	rs2294915 dominance effect - Effect Allele	C	T	0.0442774	model with complex effects
TG	rs673548 dominance effect - Effect Allele	G	A	0.0352219	model with complex effects
TG	rs673548 dominance effect - Other Allele	G	A	-0.0256205	model with complex effects
TG	rs1260326 dominance effect - Effect Allele	C	T	-0.0287181	model with complex effects
TG	rs1260326 dominance effect - Other Allele	C	T	0.0292574	model with complex effects
TG	rs2673140 dominance effect - Other Allele	A	G	-0.0179445	model with complex effects
TG	rs1471251 dominance effect - Effect Allele	A	T	-0.00820769	model with complex effects
TG	rs1471251 dominance effect - Other Allele	A	T	0.0145583	model with complex effects
TG	rs40270 dominance effect - Effect Allele	C	A	0.0221805	model with complex effects
TG	rs40270 dominance effect - Other Allele	C	A	-0.0227007	model with complex effects
TG	rs13179413 dominance effect - Effect Allele	C	T	-0.0134412	model with complex effects
TG	rs13179413 dominance effect - Other Allele	C	T	0.0162761	model with complex effects
TG	rs13167071 dominance effect - Effect Allele	C	G	0.022667	model with complex effects
TG	rs13167071 dominance effect - Other Allele	C	G	-0.0135984	model with complex effects
TG	rs9378248 dominance effect - Other Allele	G	A	0.0123003	model with complex effects
TG	rs4711750 dominance effect - Effect Allele	T	A	-0.0110538	model with complex effects
TG	rs4711750 dominance effect - Other Allele	T	A	0.00472218	model with complex effects
TG	rs4052908 dominance effect - Effect Allele	AATT	A	-0.015446	model with complex effects
TG	rs11751347 dominance effect - Other Allele	C	T	0.0143337	model with complex effects
TG	rs13234131 dominance effect - Other Allele	A	G	-0.0193254	model with complex effects
TG	rs35363532 dominance effect - Effect Allele	C	CT	0.0102828	model with complex effects
TG	rs4921913 dominance effect - Effect Allele	T	C	-0.0361847	model with complex effects
TG	rs4921913 dominance effect - Other Allele	T	C	0.0139516	model with complex effects
TG	rs117199990 dominance effect - Other Allele	C	T	0.0018678	model with complex effects
TG	rs34150554 dominance effect - Other Allele	T	TA	-0.00412441	model with complex effects
TG	rs6586886 dominance effect - Effect Allele	G	A	0.0168677	model with complex effects
TG	rs6586886 dominance effect - Other Allele	G	A	-0.0106745	model with complex effects
TG	rs28597716 dominance effect - Other Allele	A	G	0.00108692	model with complex effects
TG	rs10113750 dominance effect - Effect Allele	C	T	-0.0179149	model with complex effects
TG	rs10113750 dominance effect - Other Allele	C	T	0.00948282	model with complex effects
TG	rs28601761 dominance effect - Other Allele	C	G	-0.00533605	model with complex effects
TG	rs2954038 dominance effect - Effect Allele	A	C	0.00834806	model with complex effects
glucose	polygenic risk score	NA	NA	0.862432	baseline model
glucose	polygenic risk score	NA	NA	0.845371	model with complex effects
glucose	rs78025551 dominance effect - Other Allele	C	G	-0.0241015	model with complex effects
glucose	rs61894887 dominance effect - Effect Allele	T	C	-3.75451	model with complex effects
glucose	rs9273363 dominance effect - Effect Allele	C	A	-0.066706	model with complex effects
glucose	rs555058781 dominance effect - Other Allele	A	G	0.0219152	model with complex effects
heelBMD	polygenic risk score	NA	NA	0.870305	baseline model
heelBMD	polygenic risk score	NA	NA	0.862319	model with complex effects
heelBMD	rs2536196 dominance effect - Other Allele	C	T	0.0033448	model with complex effects
platelet	polygenic risk score	NA	NA	0.818119	baseline model
platelet	polygenic risk score	NA	NA	0.825391	model with complex effects
platelet	rs11553699 dominance effect - Effect Allele	A	G	7.7227	model with complex effects
platelet	rs11553699 dominance effect - Other Allele	A	G	3.41288	model with complex effects
platelet	rs11082304 dominance effect - Effect Allele	T	G	-1.53447	model with complex effects
platelet	rs1354034 dominance effect - Effect Allele	C	T	3.41724	model with complex effects
platelet	rs5745587 dominance effect - Effect Allele	A	G	2.20001	model with complex effects
platelet	rs5745587 dominance effect - Other Allele	A	G	-1.20693	model with complex effects
platelet	rs9399136 dominance effect - Effect Allele	T	C	-2.36338	model with complex effects
platelet	rs692502 dominance effect - Effect Allele	A	G	-2.47661	model with complex effects
platelet	rs692502 dominance effect - Other Allele	A	G	0.96937	model with complex effects
vD	polygenic risk score	NA	NA	0.70468	baseline model
vD	polygenic risk score	NA	NA	0.67335	model with complex effects
vD	rs12283049 dominance effect - Other Allele	A	G	0.477609	model with complex effects
vD	rs7439366 dominance effect - Other Allele	T	C	-0.402557	model with complex effects
vD	rs11723621 dominance effect - Effect Allele	A	G	0.811068	model with complex effects
vD	rs11723621 dominance effect - Other Allele	A	G	-0.63945	model with complex effects
vD	rs1057868 dominance effect - Other Allele	C	T	0.335146	model with complex effects
