# Supplementary material for: Genetic determinants of polygenic prediction accuracy within a population
Source: Research Square preprint supplement (doi:10.21203/rs.3.rs-1157621/v1), 2022-01-13
Supplement: Supplementary file 4 [file 782603c2ec96a9f43c80d151.xlsx]

## Sheet: QTL_coloc_interac_dom.beta.res
Trait-SNP	EffectAllele	OtherAllele	CLPP (posterior probability of colocalization between QTL and pvQTL)	beta: dominance effect - Effect Allele	beta: dominance effect - Other Allele	beta: age	beta: sex	beta: smoking	beta: alcohol use	beta: T2D	beta: T1D	beta: cholesterol-lowering drug use	beta: anti-hypertensive drug use	beta: sedentary behavior	se: dominance effect - Effect Allele	se: dominance effect - Other Allele	se: age	se: sex	se: smoking	se: alcohol use	se: T2D	se: T1D	se: cholesterol-lowering drug use	se: anti-hypertensive drug use	se: sedentary behavior	p-value: dominance effect - Effect Allele	p-value: dominance effect - Other Allele	p-value: age	p-value: sex	p-value: smoking	p-value: alcohol use	p-value: T2D	p-value: T1D	p-value: cholesterol-lowering drug use	p-value: anti-hypertensive drug use	p-value: sedentary behavior
BMI-10:104648482_CTT_C	CTT	C	0.00423741	-0.132806	0.135463	0.000657085	-0.11218	0.0161723	-0.0124775	0.120552	-0.196585	-0.0364338	-0.112102	-0.00198918	0.116379	0.0254623	0.00301381	0.0480631	0.0480787	0.0160025	0.109036	0.302637	0.0722158	0.0708844	0.0129611	0.253806	1.03767e-07	0.82741	0.0195961	0.736591	0.435556	0.268894	0.515969	0.613902	0.113771	0.878025
BMI-11:102973472_AAT_A	AAT	A	0.00968939	-0.00369518	0.0165213	0.000523911	-0.0509221	-0.0205315	-0.0169079	-0.0172194	-0.212818	-0.0940484	0.0109613	0.0102614	0.0386866	0.0217462	0.00212911	0.0338868	0.0339408	0.0112987	0.0789128	0.212936	0.0504253	0.0490819	0.00918616	0.923905	0.447416	0.805628	0.132915	0.545233	0.13454	0.827267	0.317581	0.0621692	0.823282	0.263976
BMI-1:112313430_GT_G	GT	G	0.0102625	-0.000186016	-0.0121711	2.78081e-06	0.0468352	0.0121847	-0.00349985	-0.0596944	-0.166918	-0.00291212	-0.0386674	0.00196713	0.0265172	0.0190511	0.00169935	0.0271323	0.0271644	0.00905284	0.0622575	0.163412	0.0403381	0.0392262	0.0073327	0.994403	0.522912	0.998694	0.0843164	0.653754	0.699051	0.337645	0.30704	0.942449	0.324256	0.788493
BMI-1:11254006_AC_A	A	AC	0.000818045	0.0833417	0.0167794	0.00139838	0.0696537	-0.0264383	0.0238638	-0.11981	-0.380862	-0.0120593	-0.0304364	-0.0134793	0.0451776	0.0191394	0.00202576	0.0322663	0.0323096	0.0107716	0.0746813	0.200519	0.0481087	0.0468276	0.00860834	0.065074	0.380652	0.490008	0.0308733	0.413197	0.0267306	0.108654	0.0575161	0.802072	0.515714	0.117387
BMI-11:43539044_CCATT_C	CCATT	C	0.0107862	-0.00124096	-0.000869681	-0.00164293	-0.000674784	0.00510868	0.00953285	0.0378838	0.128516	-0.0367003	-0.0124246	0.0019148	0.0213857	0.0208002	0.00161909	0.0258635	0.0258908	0.00863178	0.0599455	0.160977	0.0385254	0.03741	0.0069889	0.953727	0.966649	0.310237	0.979185	0.84358	0.269425	0.527407	0.42467	0.340781	0.739798	0.784103
BMI-12:110836225_GA_G	GA	G	0.00770407	-0.0114938	0.00524497	0.00245211	0.0613655	0.0608323	0.0296041	-0.174955	-0.39306	0.0164805	-0.0162302	0.00304829	0.0302318	0.0194807	0.00181573	0.0289244	0.0289569	0.00965005	0.0658011	0.176715	0.042789	0.0415698	0.00781526	0.703804	0.787746	0.176864	0.0338743	0.0356607	0.00215692	0.0078413	0.0261319	0.700122	0.696216	0.696506
BMI-13:99134005_CA_C	CA	C	0.0106157	-0.0447659	-0.0156495	0.00159668	0.0466745	0.0138467	0.0215017	-0.0519556	0.00568345	0.0774587	0.0110133	0.0029837	0.0309598	0.0184468	0.00176191	0.0281218	0.0281541	0.00939187	0.0647719	0.171838	0.0416698	0.0405535	0.00762639	0.148196	0.396239	0.364821	0.0969707	0.622848	0.022057	0.422478	0.973615	0.0630477	0.78595	0.695626
BMI-14:25931404_GTC_G	G	GTC	0.0107489	0.000158633	-0.02201	0.000228295	0.0350885	0.0119182	-0.0268448	0.105075	-0.151281	0.115028	0.111236	0.00667659	0.0300845	0.018294	0.00173587	0.0276832	0.0277297	0.00924541	0.0638986	0.16837	0.0412661	0.0401115	0.00755574	0.995793	0.228929	0.895367	0.204978	0.667342	0.00368951	0.100093	0.368919	0.0053128	0.00555184	0.37689
BMI-14:79940130_TAGGAGTTTTTCCAGATCATTAGCCACTTATACGGAG_T	TAGGAGTTTTTCCAGATCATTAGCCACTTATACGGAG	T	0.0797695	-0.0613051	-0.0158243	-0.00103338	0.0220051	-0.0359114	0.0296052	-0.00554427	0.301912	-0.0459286	-0.014287	-0.0123854	0.0562404	0.0204355	0.00223475	0.0356434	0.0356947	0.0119247	0.0810419	0.207877	0.0529582	0.0511958	0.00970886	0.27569	0.438725	0.643785	0.536993	0.314382	0.0130406	0.945457	0.146404	0.3858	0.780194	0.202072
BMI-14:91499131_GA_G	G	GA	0.0346108	0.0173291	-0.0118576	-0.00185398	-0.0570647	0.0297255	-0.0141654	0.114254	0.259968	0.0720849	0.0649118	0.0165512	0.0263392	0.0195496	0.00172319	0.0274694	0.0275083	0.00918706	0.063365	0.171008	0.0407395	0.0397261	0.00738764	0.510589	0.544159	0.281972	0.0377668	0.279877	0.123103	0.0713727	0.128459	0.0768277	0.102264	0.0250673
BMI-16:28704506_ATTT_A	ATTT	A	0.0407206	-0.0240962	-0.000814903	0.000646848	0.016677	-0.0338707	0.01523	-0.0376096	-0.283877	-0.0565274	-0.0665962	-0.00261414	0.025525	0.0193826	0.00168586	0.02693	0.0269721	0.00896121	0.0619344	0.162157	0.0400878	0.0389711	0.0072134	0.345159	0.966465	0.701208	0.535738	0.209201	0.0892164	0.543686	0.0800117	0.158515	0.0874787	0.717054
BMI-16:56389827_CA_C	CA	C	0.191636	0.00820864	-0.00235902	0.00030816	-0.0074568	-0.0806523	0.0115282	-0.157244	-0.481616	-0.0774775	-0.0864814	-0.00403061	0.0565378	0.0200277	0.00220314	0.0351396	0.035176	0.0117573	0.0798633	0.209005	0.0519779	0.0506815	0.00945445	0.884562	0.906236	0.888761	0.831947	0.0218591	0.326834	0.0489648	0.0212053	0.136072	0.0879409	0.669876
BMI-17:16128869_AT_A	A	AT	0.0188421	-0.0148804	-0.0173668	0.00127216	-0.0378466	-0.00509926	-0.0118734	0.00971716	-0.214949	0.0107621	-0.0265415	0.00664212	0.0245856	0.0214294	0.00175956	0.0280974	0.0281414	0.0093823	0.0644196	0.17435	0.0418148	0.040645	0.00760249	0.545013	0.4177	0.469683	0.177989	0.856209	0.20569	0.880101	0.21763	0.79689	0.513752	0.382296
BMI-18:58048164_GAA_G	GAA	G	0.0727599	-0.132011	0.0739962	-0.00689022	-0.122318	-0.0537517	-0.0487215	0.46067	0.587499	0.0527894	0.128077	-0.00737908	0.183533	0.0305933	0.00368903	0.0587427	0.0589239	0.0196586	0.139836	0.361887	0.0890501	0.0861985	0.0157486	0.471971	0.0155765	0.0617968	0.0373187	0.361653	0.0131989	0.000986604	0.104498	0.553312	0.137325	0.639389
BMI-19:2230029_CTT_C	CTT	C	0.190709	0.273701	-0.000745053	-0.00144055	-0.060383	-0.0752704	0.0160177	-0.18632	0.0661555	-0.135133	-0.14875	0.000516857	0.162695	0.0291261	0.00352049	0.0559703	0.0560412	0.0187215	0.130942	0.351946	0.0832414	0.0811632	0.0150333	0.0925131	0.979592	0.6824	0.280659	0.179232	0.392234	0.154759	0.8509	0.104508	0.0668458	0.972574
BMI-20:9860199_AAAG_A	AAAG	A	0.00157595	0.00151298	-0.00272929	0.000622519	-0.0274869	-0.000748595	-0.016365	0.051662	-0.092479	-0.00426292	-0.0470994	0.0103575	0.0252239	0.01889	0.00165673	0.0264439	0.0264702	0.00879977	0.0609743	0.162316	0.0392108	0.038155	0.00710538	0.95217	0.885119	0.707102	0.298601	0.977438	0.0629285	0.396843	0.568849	0.913426	0.217048	0.144925
BMI-2:100916615_ATCTG_A	A	ATCTG	0.0440869	-0.0146811	-0.00885304	0.00191723	-0.0296774	0.0169451	0.0161363	-0.105846	0.136495	-0.0193714	-0.0672848	-0.000655344	0.0281012	0.0185608	0.00170575	0.027287	0.0273229	0.00909609	0.0622942	0.162868	0.0405325	0.0394639	0.00734403	0.601368	0.633381	0.261024	0.276773	0.535141	0.0760682	0.0892947	0.401991	0.632706	0.088202	0.928895
BMI-2:155084383_AT_A	AT	A	0.00240011	-0.0649765	0.00184982	-0.00133452	0.017314	0.0284962	0.0117595	-0.0128241	-0.365907	-0.0783162	0.0487284	-0.0039648	0.065526	0.0206996	0.00232641	0.0370889	0.0371404	0.0123521	0.0835682	0.22091	0.0549687	0.0535579	0.00996382	0.321387	0.928792	0.566212	0.640626	0.442931	0.341087	0.878038	0.097649	0.154234	0.362915	0.69069
BMI-2:230754796_CT_C	C	CT	0.176819	0.0312168	0.030357	-0.00169616	-0.0661698	-0.0121962	-0.024191	0.03509	0.0851286	-0.0288996	0.00348599	-0.0100324	0.0407172	0.0191217	0.00196726	0.0313985	0.031436	0.0104777	0.0729709	0.193705	0.0468273	0.0455572	0.00855692	0.443277	0.112384	0.388582	0.0350821	0.698038	0.0209547	0.630604	0.660317	0.537134	0.939006	0.241026
BMI-2:236754246_AC_A	AC	A	0.00313042	0.036372	0.0114633	0.00224559	0.031707	0.0685977	-0.0101487	0.0927504	0.0984593	0.0755832	0.0704475	0.00553297	0.0457383	0.0191347	0.00203001	0.0323492	0.0323955	0.0107706	0.074331	0.196272	0.0480952	0.046869	0.00870586	0.426486	0.549118	0.268644	0.327015	0.0342175	0.346059	0.212105	0.615915	0.11606	0.132822	0.525074
BMI-2:236938085_AT_A	A	AT	0.00595391	-0.00139414	0.0158553	0.00196616	0.0480272	0.0768052	0.00644454	-0.0123752	-0.0538008	0.0206432	-0.0825981	-0.00645376	0.024455	0.0198671	0.0016862	0.0268795	0.0269229	0.00895194	0.0618517	0.168173	0.0400458	0.0389254	0.0072591	0.954539	0.424831	0.243602	0.0739777	0.00433417	0.471585	0.841419	0.749035	0.606212	0.033843	0.373973
BMI-3:141202978_AAAAG_A	AAAAG	A	0.00948731	-0.185978	0.0212893	0.00256637	0.0583983	0.0520998	0.0206726	-0.188848	-1.01364	-0.00652448	-0.174726	-0.00823131	0.150068	0.0283855	0.00337553	0.054225	0.054274	0.0181012	0.121024	0.333192	0.0796956	0.0778691	0.0144527	0.215239	0.453252	0.447085	0.281498	0.337086	0.253432	0.118661	0.00234881	0.934752	0.0248442	0.568993
BMI-3:49959570_CA_C	C	CA	1	0.00208164	0.0024761	-0.00290435	-0.0246496	-0.0746043	-0.0109823	-0.0742769	-0.0800753	-0.00305821	-0.000862378	-0.0109309	0.0223053	0.0207156	0.00165063	0.0263371	0.0263707	0.00878536	0.0606596	0.163286	0.0392424	0.0380925	0.0070861	0.925646	0.904857	0.0784866	0.34931	0.00466888	0.211276	0.22077	0.623853	0.937883	0.981938	0.122933
BMI-4:130760252_GA_G	G	GA	0.0073305	-0.0137587	0.0141521	0.000290594	0.00835755	-0.0393372	0.0120752	-0.0443173	0.424455	-0.0252007	-0.0406349	-0.00171077	0.034734	0.0185129	0.00183238	0.0292783	0.0293192	0.00976687	0.0667152	0.176189	0.0433838	0.0422516	0.00787901	0.69202	0.444603	0.873993	0.775298	0.179699	0.216331	0.506514	0.015993	0.561324	0.336183	0.828107
BMI-4:28526950_AAAAC_A	AAAAC	A	0.00595677	-0.0212587	-0.00259318	0.000925053	-0.0742606	-0.00265339	-0.0407314	-0.00645808	0.154426	0.00842465	0.0232956	0.00867192	0.0566165	0.0200019	0.00219525	0.0350848	0.0351534	0.011681	0.0816068	0.220113	0.0523304	0.0510104	0.00952488	0.7073	0.896846	0.673472	0.0342944	0.939833	0.000488602	0.936924	0.482943	0.872102	0.647899	0.362587
BMI-5:122754293_GTT_G	GTT	G	0.00124519	-0.0108511	0.0115469	-0.00137347	-0.00602235	-0.00994148	0.0048801	0.0231858	-0.0136562	-0.00485468	-0.0418338	0.0117298	0.0237193	0.0196381	0.00164931	0.026333	0.0263622	0.00880246	0.0603574	0.160955	0.0390808	0.0380592	0.00709639	0.647327	0.556544	0.404986	0.819103	0.706091	0.579305	0.700874	0.932385	0.90114	0.271693	0.0983488
BMI-7:113560043_GT_G	G	GT	0.000743799	0.019308	0.00459059	-0.00107611	0.0232516	0.01935	-0.00435846	0.106788	0.149761	0.011134	0.00380361	0.0086966	0.0261716	0.0188735	0.00167676	0.0268173	0.0268629	0.00893637	0.0616223	0.161823	0.0398743	0.0388157	0.00724071	0.46067	0.807828	0.521018	0.385921	0.471327	0.625747	0.0831061	0.354728	0.780072	0.921939	0.229726
BMI-7:39403859_CT_C	CT	C	0.545511	0.0487335	-0.000417427	0.00137457	-0.0090952	-0.0300856	0.00111148	0.165726	0.345801	0.00507334	0.0486228	0.00134161	0.0445256	0.0199894	0.00207929	0.03319	0.0332267	0.0110868	0.0777388	0.205616	0.0496066	0.0482303	0.00900333	0.273734	0.983339	0.508565	0.784058	0.36522	0.920144	0.0330219	0.0926133	0.918541	0.31339	0.881544
BMI-9:103093381_CA_C	CA	C	0.000863669	0.0149627	0.00320194	-0.00019347	0.00955066	-0.0241998	0.0129571	-0.144971	-0.091551	-0.0602702	-0.018171	0.00245675	0.021832	0.0203928	0.00161957	0.0258779	0.0259111	0.00863566	0.0592313	0.157282	0.0384475	0.0373791	0.00696885	0.493119	0.875234	0.904913	0.712079	0.350327	0.133508	0.0143843	0.560513	0.116977	0.626878	0.724439
BMI-rs1005551	C	T	0.00199685	-0.0173075	0.0157337	-0.000492827	0.0167813	0.063744	0.0106596	-0.0540245	0.0486483	0.0117294	0.0507852	-0.00395692	0.0243309	0.0190552	0.00163486	0.0261646	0.0261965	0.00872387	0.059915	0.157353	0.0388143	0.0378484	0.00706152	0.476875	0.40898	0.763073	0.521281	0.0149626	0.221749	0.367224	0.757195	0.762506	0.179662	0.575242
BMI-rs10139547	G	A	0.0137629	-0.0255455	-0.00827821	0.00355091	0.0213942	-0.0203678	0.00501297	-0.0948817	-0.117162	-0.00583765	0.0323495	0.000501456	0.0356643	0.0182421	0.00182841	0.0292065	0.0292535	0.00973618	0.0675616	0.178974	0.0434904	0.0421543	0.00792076	0.473821	0.649976	0.0521296	0.463856	0.486271	0.606637	0.160209	0.512707	0.893222	0.442841	0.94952
BMI-rs10169594	T	C	0.0600591	-0.0668231	0.00721483	-0.00151321	-0.00328497	-0.0122937	0.00704359	0.0623807	0.135648	0.0396608	0.0168497	-0.0103131	0.0269897	0.0186303	0.00168561	0.0269297	0.0269661	0.00896741	0.0611142	0.166694	0.0399921	0.0388927	0.00722446	0.0132916	0.698562	0.369332	0.902912	0.648465	0.432181	0.307386	0.415785	0.321338	0.664844	0.15343
BMI-rs10184537	C	T	0.00123682	-0.0225577	-0.00186575	-3.89268e-05	-0.0556663	-0.00795089	-0.0186896	0.0241641	0.232109	-0.100427	-0.0808955	-0.0162656	0.0287988	0.0183891	0.00171345	0.0273769	0.0274168	0.00911234	0.0630333	0.1662	0.0406213	0.0395745	0.00737425	0.433461	0.919186	0.981875	0.0420197	0.771816	0.0402663	0.701457	0.162546	0.0134268	0.0409421	0.0274044
BMI-rs10195674	G	A	0.00253383	-0.0374599	-0.0125296	0.00306198	-0.00625027	0.0140962	0.00977428	-0.017509	0.135843	0.0093762	0.0591059	-0.00935398	0.0290642	0.0184753	0.00172375	0.0275483	0.0275967	0.00918854	0.0635032	0.169976	0.0409846	0.0398255	0.0074559	0.197445	0.49766	0.075677	0.820514	0.609496	0.287444	0.782765	0.42418	0.819045	0.137778	0.209636
BMI-rs10269783	G	A	0.0114891	0.0299282	-0.00279221	-0.00176509	-0.0608363	-0.0278008	0.00610784	-0.0757171	-0.0945874	-0.0436459	0.0108738	-0.0187855	0.0255898	0.0188031	0.0016633	0.0265259	0.0265675	0.0088613	0.0610478	0.162974	0.0394018	0.0383221	0.00713563	0.24219	0.88195	0.288602	0.0218221	0.295367	0.490653	0.214869	0.561656	0.267988	0.776604	0.00847347
BMI-rs1030015	T	G	0.00648371	-0.0107206	0.00346755	0.00262387	-0.0202685	-0.0168866	-0.0131253	0.0940586	0.144734	0.0521408	0.0138282	0.00259266	0.0215039	0.0205435	0.00161522	0.025793	0.0258251	0.00860445	0.0594079	0.157944	0.038359	0.0373236	0.0069549	0.618101	0.865962	0.104277	0.431977	0.513187	0.12716	0.113361	0.359478	0.174059	0.711015	0.709311
BMI-rs10404726	C	T	1	-0.0143897	-0.01891	0.001741	-0.0583051	-0.030324	-0.018846	-0.0981181	-0.00127809	-0.0482489	0.0407642	0.00479137	0.0221308	0.0202144	0.00162142	0.0258898	0.0259284	0.00864058	0.0594513	0.160937	0.0385106	0.0375252	0.00700506	0.515556	0.349546	0.282935	0.0243198	0.242191	0.0291765	0.0988636	0.993664	0.210253	0.277341	0.493984
BMI-rs1048932	C	A	0.00771696	0.00381879	-0.0225929	-0.00328732	-0.023885	-0.0221246	0.00410054	-0.0552894	-0.0431956	0.00754046	0.0111038	0.00171488	0.0241422	0.0191342	0.00163796	0.0261638	0.0261982	0.00872737	0.0601404	0.159288	0.0389142	0.037781	0.00704602	0.874316	0.2377	0.044755	0.361294	0.398388	0.638463	0.35792	0.786253	0.846355	0.768834	0.807709
BMI-rs1049205	T	C	0.011636	-0.00682719	0.0234393	-0.000492539	0.0176778	-0.0241845	0.017615	-0.0321846	-0.142503	-0.0108156	-0.0583957	-0.0147382	0.0230258	0.0195809	0.00162815	0.0259532	0.0259813	0.00865411	0.0593834	0.160724	0.0386111	0.037566	0.00701532	0.766847	0.23129	0.76226	0.495783	0.351937	0.0418065	0.587833	0.375278	0.779388	0.120071	0.0356555
BMI-rs10513801	T	G	0.0203308	0.0680632	-0.00228954	-0.000471958	0.0205701	0.0477216	-0.0224786	0.0160525	-0.294226	0.109171	0.00315982	-0.000331282	0.0676384	0.0209923	0.00235547	0.0376871	0.0377265	0.0125955	0.0870574	0.232231	0.0563503	0.0547651	0.0102367	0.314281	0.913151	0.841194	0.585195	0.205896	0.0743202	0.853708	0.205173	0.0527026	0.95399	0.974183
BMI-rs1064213	G	A	0.0179364	0.000404705	-0.0160051	-0.00187038	0.0201727	-0.0439625	0.0157638	-0.128995	-0.355867	-0.0297296	-0.0124225	0.00970134	0.0216962	0.0204078	0.00161832	0.0258159	0.0258474	0.00859596	0.0594378	0.15832	0.038513	0.037331	0.0070045	0.985118	0.432887	0.247782	0.434564	0.0889722	0.0666762	0.029989	0.0245918	0.440153	0.739311	0.16605
BMI-rs10694251	GTAAA	G	0.173189	0.0448257	0.0111409	-0.000237568	0.00400141	-0.0310842	-0.024418	0.0132531	-0.193002	0.00825943	0.0355801	-0.00395255	0.0245385	0.0192341	0.00165414	0.0263858	0.0264239	0.00881125	0.0615812	0.165127	0.039352	0.0382478	0.00711067	0.0677389	0.562437	0.885801	0.879463	0.239449	0.00558493	0.829601	0.242483	0.833757	0.352243	0.578306
BMI-rs10764256	C	T	0.00791759	0.144137	-0.0963462	-0.0013689	-0.0342893	0.0279993	-0.000591486	0.134792	0.398091	0.00432252	-0.0153931	0.00694045	0.0411933	0.0185873	0.001935	0.0308608	0.0308917	0.0103024	0.0711093	0.186244	0.0459701	0.0446514	0.00840701	0.000466998	2.17995e-07	0.479294	0.266528	0.364742	0.954217	0.0580193	0.0325605	0.925086	0.730291	0.409058
BMI-rs10766451	C	T	0.00785709	-0.00969268	-0.0160686	0.00119868	-0.028512	-0.0210884	0.00107729	-0.152559	-0.112306	-0.0399018	-0.104849	-0.00665487	0.0302998	0.0184832	0.00175062	0.0279586	0.027999	0.00933961	0.0644797	0.170559	0.0415327	0.040355	0.00752884	0.74905	0.384649	0.493521	0.307828	0.45134	0.908171	0.0179821	0.510245	0.336689	0.00937339	0.376743
BMI-rs10774018	G	C	0.00687841	-0.00264152	0.00662494	-0.00367005	-0.00088333	-0.0446938	0.0132105	-0.175055	-0.197068	-0.0905817	-0.0431956	-0.0130591	0.0431384	0.0187367	0.00196797	0.0313968	0.0314374	0.0104743	0.071265	0.195428	0.0467525	0.0453822	0.00842236	0.951173	0.723653	0.062198	0.977555	0.155122	0.207226	0.0140345	0.313268	0.0526893	0.341191	0.121017
BMI-rs10824211	C	T	0.0347726	-0.166731	0.103112	0.000483377	0.0314219	0.0707918	0.00805236	-0.113987	-0.261151	0.0379342	0.0211217	0.00644148	0.0667565	0.0209518	0.00235105	0.0376263	0.0376409	0.0125348	0.0863472	0.245953	0.0557946	0.05423	0.0101687	0.0125041	8.59763e-07	0.837103	0.403659	0.0600119	0.520613	0.186801	0.288331	0.496575	0.696919	0.526435
BMI-rs10838193	G	A	0.229467	-0.0106395	-0.00481379	0.000700249	0.00510287	-0.0224476	-0.000180813	0.157361	-0.0672645	0.0395783	0.0584819	0.0120362	0.0304059	0.0185451	0.00176044	0.0280724	0.0281156	0.00939351	0.0650657	0.17228	0.0417839	0.0406568	0.00760374	0.726401	0.795195	0.6908	0.855759	0.424638	0.984643	0.0155858	0.696214	0.343531	0.150315	0.113438
BMI-rs10842240	G	C	0.229212	0.0554937	0.0213626	0.00272849	-0.0318827	-0.0396625	0.0070542	0.0861311	-0.235101	0.0745518	-0.0188074	-0.0132776	0.0806902	0.0221641	0.00254951	0.0406455	0.0406656	0.0135465	0.0922659	0.252668	0.0600409	0.0586349	0.0109911	0.491619	0.335128	0.284528	0.432802	0.329396	0.602549	0.350558	0.352128	0.214355	0.748396	0.227039
BMI-rs10878947	T	A	0.00211023	0.0247887	0.00636666	-0.00294005	0.0360721	0.00124976	0.0169401	-0.151568	-0.278237	-0.0475624	-0.0418299	-0.0137652	0.0346786	0.0182767	0.00181749	0.0289782	0.0290123	0.00964955	0.0654509	0.175516	0.0429929	0.041749	0.00784456	0.474725	0.727579	0.105741	0.213206	0.96564	0.07917	0.0205727	0.11291	0.268605	0.316375	0.0793048
BMI-rs10898330	T	C	0.556808	0.0113824	-0.0227356	0.000967501	-0.0493892	0.0212803	-0.00182977	0.0297403	-0.393529	-0.0554894	-0.0259172	0.00699956	0.0220135	0.0205535	0.00163003	0.0260877	0.0261219	0.00869925	0.0600308	0.158084	0.0387039	0.0376895	0.00704687	0.605114	0.268655	0.552815	0.0583327	0.415271	0.833405	0.620306	0.0127979	0.151663	0.491674	0.320572
BMI-rs1092403	T	C	0.115582	-0.0105413	0.0158753	-6.40756e-05	-0.0124497	0.00989108	-0.00536383	0.0167769	-0.097982	-0.0179271	-0.011924	-0.00720189	0.0225047	0.0202205	0.00163692	0.0261454	0.0261779	0.00873611	0.0601853	0.161671	0.0389493	0.0378705	0.00711314	0.639496	0.43239	0.968776	0.633951	0.705549	0.539227	0.780434	0.544477	0.645325	0.752866	0.311312
BMI-rs10930502	A	G	0.00616198	-0.00935393	-0.00722657	0.00217279	-0.0155995	0.015296	-0.00971526	-0.0874945	-0.0140006	-0.00165821	0.00187504	-0.00261718	0.031926	0.0182294	0.00177036	0.0282211	0.028278	0.00941715	0.0655579	0.175792	0.0420672	0.04087	0.00768675	0.769532	0.691792	0.219706	0.580429	0.588567	0.302234	0.182004	0.936521	0.968557	0.963407	0.733496
BMI-rs10954772	C	T	0.0182203	-0.135111	0.0936759	-0.00113757	0.0135545	0.00768835	0.0131975	-0.147536	-0.0668549	-0.0497221	-0.0973024	-0.00507534	0.0310376	0.0184412	0.0017647	0.0281558	0.028196	0.00936355	0.0637196	0.170186	0.0417713	0.0405851	0.00758546	1.34255e-05	3.78291e-07	0.519172	0.630225	0.785103	0.158702	0.0205926	0.694442	0.233914	0.0165091	0.50344
BMI-rs10962549	C	T	0.00229648	-0.063485	-0.0086526	-0.000729316	0.00970539	0.0407387	0.00854946	0.0292898	0.196208	0.0217318	-0.0154983	0.00141981	0.0559456	0.0197763	0.00217224	0.0346924	0.0347281	0.0115472	0.0787147	0.211443	0.0515384	0.0499563	0.00931282	0.256475	0.661732	0.737064	0.779665	0.240766	0.459062	0.709818	0.353436	0.673273	0.756381	0.878827
BMI-rs1101141	T	G	0.00110487	0.0122938	0.00280232	-0.000484062	0.010444	0.0336927	0.0179738	-0.0524089	-0.0890283	0.0514154	0.032384	0.00306746	0.0386955	0.0185484	0.00189622	0.0302538	0.0302719	0.0100904	0.0693453	0.183774	0.0448267	0.0437284	0.00813578	0.750708	0.879911	0.798509	0.729935	0.265708	0.0748694	0.44979	0.628072	0.251391	0.458955	0.706149
BMI-rs11012732	A	G	0.00915859	-0.14251	0.127999	-0.000374118	0.0356066	-0.0205784	0.000624419	-0.0673983	0.138861	0.0145297	0.0210282	0.00751934	0.0292327	0.0183016	0.00172298	0.0274537	0.027486	0.0091505	0.0633986	0.167353	0.0407957	0.0397243	0.00735192	1.08867e-06	2.68109e-12	0.828104	0.194643	0.454046	0.945596	0.287743	0.406681	0.721723	0.596561	0.306417
BMI-rs11030112	G	A	0.141942	0.0566485	-0.0529806	0.00311739	0.0061181	0.0146557	0.0110422	0.0522507	-0.103858	-0.0243037	0.0178485	0.0136726	0.0298961	0.0183245	0.00172666	0.0275634	0.0275852	0.00919326	0.0632491	0.169607	0.0409949	0.0398754	0.00738852	0.0581143	0.00383749	0.0710062	0.824341	0.59522	0.229705	0.408743	0.540311	0.553285	0.654438	0.0642414
BMI-rs11074452	G	C	1	0.0336071	0.00929349	0.00355146	0.0488899	0.0170807	0.0245886	0.0242502	0.0844268	-0.0382439	-0.0586314	-0.0063184	0.0213083	0.0207885	0.00161463	0.0258213	0.0258536	0.00860564	0.0595828	0.159767	0.0383833	0.0373173	0.00699162	0.114754	0.654839	0.0278395	0.0583065	0.508825	0.00427351	0.684008	0.597196	0.319073	0.116148	0.366151
BMI-rs11079710	C	T	0.00271573	-0.0212163	-0.0032165	-0.000978482	0.0245227	0.0710111	0.0166412	-0.18392	-0.27571	0.00194857	0.00213537	0.0118952	0.0357757	0.0182614	0.00183214	0.0292569	0.0292977	0.00974453	0.0672139	0.178911	0.0435028	0.0424416	0.00794871	0.553158	0.860187	0.593297	0.401927	0.0153609	0.0876851	0.00621327	0.123307	0.964273	0.959873	0.134526
BMI-rs11109097	T	C	0.00458672	-0.0181741	-0.00154909	0.0012149	0.0484189	-0.00354019	0.0186012	-0.0667782	0.136665	-0.0153776	-0.00549082	-0.000744174	0.0318541	0.0183647	0.00177371	0.028327	0.0283578	0.00943116	0.0645385	0.170776	0.0422248	0.0409076	0.00764672	0.568311	0.932777	0.493378	0.0874001	0.90065	0.0485747	0.300809	0.423562	0.715721	0.893225	0.922473
BMI-rs11129655	C	A	0.00168441	-0.0250628	0.0102641	-0.00191533	0.0685406	0.0150287	0.00855853	0.00278857	0.142634	0.0262179	0.0218076	0.0180593	0.0306291	0.01834	0.00175172	0.0279268	0.0279562	0.00929417	0.0640239	0.169825	0.041314	0.0402194	0.00750901	0.413206	0.575716	0.274221	0.0141167	0.590868	0.35713	0.965259	0.400971	0.52569	0.587671	0.0161729
BMI-rs11160601	C	T	0.002933	-0.0492284	0.00934328	0.00108263	0.0938567	-0.0155647	0.0224356	-0.136542	-0.396893	-0.00237087	-0.0339614	0.00417856	0.101854	0.0242516	0.00283896	0.0452983	0.0453264	0.0150581	0.101376	0.264118	0.0665834	0.0654496	0.0119299	0.628866	0.700042	0.702946	0.0382695	0.731304	0.136242	0.178017	0.132914	0.971595	0.603835	0.726146
BMI-rs11201985	G	A	0.754617	-0.0818476	0.0869769	0.00208844	0.000651424	-0.0469972	0.0166828	0.0518913	-0.0626225	-0.00530051	-0.051167	-0.00313359	0.0227845	0.0201094	0.00163942	0.0262074	0.0262427	0.00873431	0.0604488	0.160437	0.038956	0.0379634	0.00706118	0.000327892	1.5247e-05	0.202704	0.980169	0.0733154	0.0561311	0.390654	0.696297	0.891771	0.177726	0.657204
BMI-rs11218510	G	A	0.0282746	0.00210175	-0.0170698	-0.000338952	-0.0563325	-0.0584914	-0.00901018	0.0470832	-0.294358	0.00980361	0.0268464	0.0129084	0.0247976	0.0189704	0.0016483	0.0263318	0.0263764	0.00878635	0.0608095	0.165024	0.039229	0.0381762	0.00709644	0.932455	0.368223	0.837075	0.0324097	0.0265855	0.305141	0.438769	0.0744699	0.802659	0.481918	0.0689148
BMI-rs11223970	A	G	0.011255	-0.0422034	-0.0114198	0.000319901	0.04784	0.0496906	0.0156158	0.103345	-0.330171	0.102992	0.0404469	-0.0144096	0.0558989	0.0198388	0.00217611	0.0347713	0.0348239	0.0116228	0.0794166	0.212549	0.0514559	0.0502896	0.00942015	0.450253	0.564865	0.883127	0.16887	0.153606	0.179096	0.193155	0.120332	0.0453331	0.421236	0.126103
BMI-rs112506159	AATGTACC	A	0.017688	0.00396868	-0.00295285	-0.00169415	-0.0298882	-0.00125652	-0.0232356	0.0630445	0.130599	0.00128382	-0.0735388	-0.00740957	0.0355158	0.0182951	0.00183429	0.0292479	0.0292884	0.00974595	0.0680619	0.179878	0.0434632	0.0424803	0.00794571	0.911026	0.871778	0.355695	0.306832	0.96578	0.0171203	0.3543	0.467815	0.976435	0.0834309	0.351067
BMI-rs112566467	C	T	0.00504919	-0.0142654	-0.00357626	-0.000602651	0.0472897	-0.0392838	0.00491355	0.0591736	-0.0626355	0.0331526	0.0430089	-0.0062756	0.044655	0.0188943	0.00200102	0.031877	0.031907	0.0106344	0.0722258	0.188689	0.0472615	0.0458615	0.00860647	0.74938	0.849875	0.763284	0.137941	0.218251	0.64405	0.412624	0.739926	0.483009	0.348349	0.465898
BMI-rs112807358	A	C	0.00754376	-0.0796186	0.00353347	0.000578238	-0.0332184	-0.00284465	-0.0152568	0.0258405	-0.0839516	-0.0182964	0.0105237	-0.0115362	0.0634343	0.0205915	0.00230533	0.036734	0.0367853	0.0121964	0.0843796	0.221622	0.0545674	0.0529821	0.0097948	0.20943	0.863753	0.801948	0.365839	0.93836	0.210964	0.759422	0.704833	0.737401	0.842554	0.238883
BMI-rs113230003	G	A	0.0405294	0.0387541	0.0192873	0.000442344	-0.0219424	0.0198045	-0.010865	0.149496	0.250091	-0.023855	0.0543953	0.00267093	0.0369818	0.0185185	0.0018694	0.0298263	0.0298878	0.0099952	0.0687894	0.184246	0.0444066	0.0433242	0.00805789	0.294674	0.297639	0.812948	0.461929	0.507569	0.277027	0.0297633	0.174664	0.591134	0.209284	0.740291
BMI-rs113658831	C	G	0.0026454	0.00107337	0.00328312	0.00100988	0.013462	-0.0391477	0.0054459	-0.0766312	-0.467781	-0.0547451	0.036708	0.00742922	0.056617	0.0198712	0.00218218	0.0349219	0.0349702	0.0116267	0.0792488	0.210778	0.0518725	0.0503565	0.00936689	0.984874	0.868771	0.64352	0.699876	0.262947	0.639502	0.33356	0.0264668	0.291254	0.466025	0.4277
BMI-rs113856511	C	CT	0.0046849	0.089993	-0.0171996	0.00105616	0.0545049	0.0395194	0.00745705	-0.184073	-0.0195744	0.0394473	-0.0454251	-0.00530771	0.0842423	0.0225593	0.00259627	0.0414928	0.0415421	0.0138535	0.0938036	0.247643	0.0615941	0.0599539	0.0112544	0.285403	0.445811	0.684155	0.188982	0.341448	0.590384	0.0497263	0.936999	0.521888	0.448651	0.637205
BMI-rs113866544	T	C	0.851832	-0.0469248	-0.0364476	0.00359797	0.0521862	-0.021352	-0.0211041	0.0013449	0.220735	0.0648882	0.0575108	0.0149414	0.135079	0.0269922	0.00322582	0.0513148	0.0513706	0.0169784	0.120394	0.317072	0.0767173	0.0745622	0.0136829	0.728301	0.17692	0.264696	0.309164	0.67767	0.213871	0.991087	0.486325	0.397661	0.440522	0.274843
BMI-rs11433332	A	AG	0.000694454	-0.0302495	0.00485723	0.000974358	0.0469141	0.0218865	0.0137811	-0.00225356	-0.209383	-0.0355329	-0.0628815	-0.0109164	0.0220134	0.0208758	0.00164356	0.02628	0.0263172	0.00877538	0.0599668	0.157443	0.0390993	0.0379666	0.00709815	0.169399	0.816016	0.553294	0.0742363	0.405612	0.116317	0.970022	0.183553	0.363464	0.0976771	0.12407
BMI-rs11496125	C	T	0.0549105	0.0219328	0.0114422	0.00231396	0.0380002	-0.0689349	0.0208841	-0.113127	-0.308219	-0.0732019	-0.0198241	0.00727506	0.0239271	0.0194916	0.00164633	0.026331	0.0263639	0.00878043	0.060342	0.167088	0.039119	0.0380475	0.00706375	0.359325	0.557182	0.159866	0.148973	0.00893	0.0173848	0.0608254	0.0650899	0.0613108	0.602342	0.303052
BMI-rs11546878	C	T	0.0158855	0.0430841	-0.00144154	0.00180516	0.000803587	0.0790166	-0.0279165	0.0305425	-0.221301	-0.0321105	-0.0115456	0.00919564	0.0530942	0.019467	0.00212215	0.0339254	0.0339991	0.0113325	0.0776186	0.208801	0.0504625	0.0492719	0.00915858	0.417099	0.940971	0.394977	0.981102	0.0201222	0.0137629	0.693955	0.289207	0.524566	0.814733	0.315358
BMI-rs11633022	A	C	0.00817128	-0.00205366	0.00185153	-0.000563742	-0.0135586	0.00802387	-0.00864876	0.0038567	0.038611	-0.0550733	-0.0194584	0.00728937	0.0267944	0.0195465	0.00173057	0.0276452	0.0276741	0.00919327	0.0637356	0.170203	0.0411232	0.0400697	0.00744499	0.938906	0.924534	0.74461	0.623815	0.771861	0.346823	0.951749	0.820538	0.180499	0.627242	0.327534
BMI-rs116394958	C	T	0.182242	-0.028872	-0.00326008	0.000465532	0.0168426	-0.0260501	0.0170093	-0.0917135	-0.224835	0.0019676	0.0241668	-0.011	0.0344152	0.0182868	0.00181275	0.0289429	0.02899	0.00965231	0.0667831	0.181014	0.0429323	0.0417899	0.00784039	0.40151	0.858507	0.797325	0.560619	0.368874	0.0780369	0.169659	0.214206	0.963446	0.563067	0.160623
BMI-rs11655587	C	T	1	-0.0314877	0.00803045	-0.000152508	0.00440648	0.0538844	-0.00740894	0.0977859	0.183428	0.0339801	0.0274334	0.00630919	0.027193	0.0185731	0.00168511	0.0269207	0.0269629	0.00898786	0.0625663	0.166478	0.0401588	0.0390386	0.00723018	0.246891	0.665474	0.927887	0.869981	0.0456676	0.409754	0.118073	0.270545	0.397475	0.482227	0.382873
BMI-rs11656076	G	A	0.000877991	-0.0495275	0.0292704	-1.03352e-05	0.000686347	-0.0109868	-0.00638842	-0.0667869	-0.434501	-0.0201186	0.0614489	-0.0048993	0.0416664	0.0185896	0.00193752	0.0309193	0.0309701	0.0103078	0.0709618	0.190158	0.0459001	0.0445955	0.00837633	0.234571	0.115361	0.995744	0.98229	0.722773	0.535411	0.34662	0.0223166	0.661161	0.168231	0.558617
BMI-rs1167309	T	C	0.00239157	-0.0416895	-0.000687343	-0.00122341	0.0204019	-0.0217212	0.0219483	-0.0633959	0.103488	0.00843949	-0.017005	-0.00944285	0.0301171	0.0183214	0.00173691	0.0277307	0.0277452	0.00925998	0.0637393	0.170404	0.0411777	0.039892	0.00749289	0.166284	0.970074	0.481209	0.461904	0.433698	0.0177778	0.319926	0.543645	0.837609	0.669908	0.207585
BMI-rs11690035	C	T	0.00132258	0.0401678	0.0166348	-0.00110986	0.0668259	-0.00319872	0.0140819	-0.141466	0.304786	0.0170008	-0.122451	-0.00947528	0.129594	0.0267432	0.00317707	0.0506777	0.0508067	0.0169224	0.114263	0.303565	0.0752157	0.0733025	0.0134843	0.756598	0.533929	0.726839	0.187289	0.949799	0.40533	0.215691	0.315369	0.82118	0.0948236	0.482251
BMI-rs11777492	A	G	0.00389917	0.0845341	-0.0851037	0.0014989	-0.00927701	0.01442	-0.000327698	0.0559793	-0.0949086	-0.00668818	0.0387253	0.0110887	0.0392497	0.0186446	0.00191413	0.0305335	0.0305674	0.0101894	0.070229	0.187584	0.0454146	0.0441555	0.00816942	0.0312608	5.00856e-06	0.433587	0.761258	0.637109	0.974344	0.425395	0.612891	0.88292	0.380476	0.174676
BMI-rs11782074	G	T	0.0091077	-0.095922	0.0679953	-0.00100568	0.0153871	0.049653	0.00210873	0.0734127	0.0873864	0.056761	-0.0232258	-0.00296369	0.0264943	0.0192055	0.00170822	0.0272695	0.0273173	0.00910324	0.0622777	0.165525	0.0404788	0.0393969	0.0073535	0.000294127	0.000399592	0.556042	0.572578	0.0691199	0.816814	0.23848	0.597545	0.160846	0.555505	0.686926
BMI-rs117934006	C	T	0.476375	-0.103026	-0.0185903	-0.0033982	-0.0296029	-0.0696439	-0.036636	-0.140171	-0.0937336	0.00736625	0.00665139	0.0171268	0.114012	0.0253113	0.00297578	0.0476508	0.0477197	0.0158391	0.111607	0.293457	0.0711219	0.0690746	0.0130051	0.366187	0.462664	0.253475	0.534438	0.144446	0.0207228	0.20914	0.749414	0.917509	0.923288	0.187866
BMI-rs1179906	T	C	0.00259214	-0.066394	-0.0225801	-0.00201802	-0.0495906	0.00885687	0.0291969	-0.124041	0.0230599	-0.106154	-0.00659613	0.00454943	0.0498122	0.0192616	0.00208296	0.0331526	0.0331953	0.0110364	0.0756964	0.199784	0.0494116	0.0478648	0.00897162	0.18257	0.241083	0.332636	0.134699	0.789615	0.00815724	0.101283	0.908109	0.0316872	0.890393	0.612092
BMI-rs11826177	C	T	0.0199758	0.0117551	0.0141488	0.00161071	-0.0439753	-0.0165364	-0.00290233	0.107947	0.303844	-0.0228584	-0.029282	-0.00121254	0.027568	0.0190418	0.00172583	0.0275064	0.027539	0.00917403	0.0630853	0.163418	0.0409637	0.039891	0.00743582	0.669814	0.45746	0.350669	0.109882	0.548193	0.751726	0.0870587	0.0629856	0.576835	0.462919	0.870465
BMI-rs1182639	G	A	0.000644345	0.0863151	-0.0155243	-0.00247063	0.0905565	0.112065	0.00471087	0.102865	-0.29958	0.0866367	-0.0651913	0.00532478	0.0996145	0.0241366	0.00282372	0.0449879	0.0450269	0.0149529	0.102306	0.271835	0.0666353	0.0643324	0.01205	0.386222	0.520103	0.381599	0.0441252	0.0128166	0.752726	0.314676	0.270434	0.193547	0.310894	0.658569
BMI-rs11855853	C	T	0.00296576	-0.0358029	-0.0204362	0.000212087	-0.0367744	0.0193811	-0.00892164	0.0158087	-0.421167	0.0193642	0.0210409	-0.0013903	0.035355	0.0184086	0.00183318	0.0293232	0.0293669	0.00978325	0.0675265	0.182833	0.043668	0.0424399	0.00798398	0.311219	0.266938	0.907895	0.209804	0.509277	0.361807	0.814899	0.0212481	0.657447	0.620051	0.861759
BMI-rs11896061	G	A	0.00229237	0.000851419	0.0160828	-0.00063301	0.0109622	-0.0134253	-0.0119835	0.0158607	-0.0348893	-0.0600949	0.00446797	-0.00468116	0.0254012	0.0188556	0.00165961	0.0264788	0.0265297	0.00884621	0.0607061	0.162133	0.0394702	0.0383002	0.00712147	0.973261	0.39369	0.702891	0.678876	0.612824	0.175529	0.793885	0.82962	0.127876	0.907132	0.51097
BMI-rs11915747	C	G	0.00399213	0.0132715	-0.0119263	0.00170381	-0.014413	0.0184488	-0.00797913	0.1183	0.0239801	0.0417807	0.0760526	0.00529491	0.0275155	0.0184843	0.00169307	0.0269832	0.0270218	0.00899758	0.0621001	0.165226	0.0401846	0.0390675	0.00734724	0.629573	0.518791	0.314251	0.59324	0.494772	0.375183	0.0567833	0.884604	0.298472	0.0515727	0.471116
BMI-rs11971098	A	G	0.00362083	-0.094947	0.0036488	0.00452242	0.161956	-0.0383167	0.0307145	-0.074195	0.41	0.0141077	-0.0746201	-0.00331139	0.107079	0.0246367	0.00289662	0.0461666	0.046229	0.0154438	0.104547	0.271249	0.0683964	0.0667725	0.0126808	0.375242	0.882261	0.11846	0.000451428	0.407193	0.0467259	0.477901	0.130656	0.836585	0.263771	0.79399
BMI-rs12027371	G	T	0.00638998	0.0230902	-0.00694725	0.00030938	-0.0342612	-0.0387182	-0.00438353	0.13873	0.097587	-0.00784849	-0.0245237	0.00515178	0.0225892	0.0198149	0.00162093	0.025865	0.0259072	0.00862905	0.0594875	0.155757	0.0385173	0.0374281	0.00698923	0.306696	0.725883	0.848631	0.1853	0.135047	0.611456	0.0196971	0.530966	0.838537	0.512327	0.461061
BMI-rs12031634	G	A	0.00433416	0.00201272	-0.00138008	0.00226293	0.0210987	0.0060845	-0.00366863	0.0841487	-0.255782	0.0882538	0.046877	-0.00632919	0.0322584	0.0183141	0.00177819	0.0283946	0.0284315	0.00950313	0.0659717	0.172559	0.042307	0.0411376	0.00769922	0.950249	0.939932	0.203161	0.45745	0.830543	0.699464	0.202124	0.138265	0.0369774	0.254489	0.411046
BMI-rs12084253	G	T	0.00327612	-0.00146077	-0.0154733	0.0010401	0.0714168	0.0312642	-0.0011601	-0.0660963	-0.00940439	0.0362914	0.0066931	0.0188475	0.0331769	0.0182205	0.00178818	0.0285527	0.0286032	0.0095263	0.0659909	0.175879	0.0424673	0.0412479	0.00766671	0.964881	0.395759	0.5608	0.012377	0.274382	0.903075	0.316539	0.957357	0.39279	0.871097	0.013959
BMI-rs12122664	A	C	0.0043827	0.0164039	0.0127197	0.00155565	0.0595832	0.0551962	0.00735181	0.0975748	-0.110496	0.0514306	0.00723464	0.00674562	0.0305652	0.01832	0.00174928	0.0278768	0.027907	0.00929766	0.0636115	0.171153	0.0413643	0.040293	0.0074763	0.591485	0.487493	0.373837	0.0325682	0.0479452	0.42911	0.125051	0.518539	0.213737	0.857506	0.366916
BMI-rs12140153	G	T	0.0164051	0.151049	0.0108515	-0.00232991	-0.00912922	-0.141751	-0.0326692	-0.0145763	-0.532042	-0.0915215	-0.0271947	0.0170378	0.10442	0.0246039	0.0028806	0.0459232	0.0460413	0.0153141	0.108532	0.285331	0.0690549	0.0669432	0.0124196	0.148026	0.659178	0.418615	0.842425	0.00207876	0.0329035	0.893162	0.0622321	0.185059	0.68457	0.170113
BMI-rs1216551	C	G	0.000878831	0.0763638	-0.0825388	-0.00593648	-0.0707942	0.0128663	-0.0131685	0.0117685	0.145609	-0.0697992	-0.0473779	0.0128823	0.021771	0.0204238	0.00162282	0.025856	0.0258883	0.00862833	0.0596553	0.158168	0.0385338	0.0373989	0.00700263	0.000452251	5.31687e-05	0.000254113	0.00618153	0.619194	0.126964	0.843613	0.35726	0.0700845	0.205219	0.0658243
BMI-rs1225060	G	A	0.00869078	-0.0550752	0.00477726	-0.000199632	-0.000183083	-0.0481852	0.0226377	-0.0578432	-0.281541	-0.000226213	0.015856	-0.00452364	0.0341895	0.0183008	0.00180946	0.0288832	0.0289211	0.00959906	0.0661261	0.179217	0.0427834	0.0417588	0.00780307	0.107207	0.794061	0.91215	0.994942	0.0956962	0.0183582	0.381716	0.116197	0.995781	0.704166	0.562101
BMI-rs1227244	A	G	0.00111481	-0.150064	0.0719893	-0.00145518	0.037306	-0.0182944	0.00511235	-0.011017	0.297514	-0.0555839	0.00734267	-0.00929711	0.0298389	0.0184267	0.00174198	0.0277808	0.0278097	0.00924806	0.0638835	0.167205	0.0413234	0.0401645	0.00747118	4.9303e-07	9.35527e-05	0.403516	0.179316	0.510641	0.580399	0.86308	0.0751861	0.178596	0.854943	0.213356
BMI-rs12330631	C	T	0.0235046	0.0269489	-0.00514476	0.00107656	-0.0137956	-0.0225604	-0.0201137	0.202593	0.251851	0.0215061	0.022317	0.00441518	0.0267339	0.0186232	0.00168269	0.0268387	0.0268747	0.00894934	0.0611059	0.161593	0.0399165	0.0388855	0.00727047	0.313436	0.782352	0.522313	0.60724	0.401208	0.0246088	0.000915104	0.119105	0.590042	0.566025	0.543669
BMI-rs12369179	C	T	0.0372038	0.0632088	-0.0065921	-0.00174147	-0.00959002	0.0064771	-0.0359272	-0.0846938	0.259234	-0.0303969	0.060001	0.0237945	0.0999203	0.0240841	0.00280552	0.0448886	0.0449499	0.0150034	0.102634	0.266713	0.0666314	0.0648103	0.0120725	0.527001	0.784306	0.53478	0.830828	0.885425	0.0166394	0.409258	0.331072	0.64825	0.354555	0.0487288
BMI-rs12432754	G	A	0.00264382	0.0448698	0.0284642	-0.00152433	-0.00163532	-0.0288475	-0.0158609	0.145126	-0.0058752	-0.00293106	0.0273754	0.00972103	0.0269314	0.0187038	0.00168972	0.0269649	0.0270054	0.00900757	0.0619721	0.164352	0.0402365	0.0391767	0.00733922	0.0956998	0.12805	0.366993	0.951641	0.285425	0.0782666	0.019192	0.971484	0.941929	0.484698	0.185328
BMI-rs12454712	T	C	0.280623	0.0466609	-0.0018938	0.00010421	-0.0225421	-0.0537224	0.00369709	-0.145074	-0.13178	-0.0295966	-0.036435	-0.0153757	0.0260506	0.018641	0.00166402	0.0265823	0.0266151	0.00886193	0.0612124	0.158801	0.0395887	0.0385347	0.0071557	0.0732687	0.91908	0.950065	0.396433	0.0435415	0.676541	0.0177884	0.406628	0.454702	0.344398	0.0316573
BMI-rs12476833	C	T	0.0138459	-0.00708676	0.0147018	-0.001093	-0.00363191	0.0381968	0.00690347	0.154484	0.574386	-0.0168664	0.0324397	-0.00155358	0.0253264	0.0189889	0.00166875	0.0265844	0.0266259	0.00887783	0.0609192	0.161227	0.0394613	0.0383887	0.00716582	0.779618	0.438794	0.512482	0.891333	0.15141	0.436801	0.0112169	0.000367291	0.669077	0.398093	0.828361
BMI-rs12507026	A	T	1	-0.0395772	-0.0206482	0.00381533	0.0306738	-0.00492893	0.00823175	0.0358709	-0.0719983	0.0460104	-0.0172804	-0.00588938	0.0232945	0.0195348	0.00162866	0.026015	0.0260466	0.00868619	0.0592929	0.156283	0.0386708	0.0376411	0.00700072	0.0893222	0.290515	0.0191501	0.238368	0.849909	0.343292	0.545195	0.64502	0.234128	0.646175	0.400207
BMI-rs12598679	G	A	1	0.0181398	-0.00040153	0.00144364	0.0101228	0.031389	0.00330543	0.0141889	-0.0211329	0.0220144	0.0472104	0.0138589	0.0213015	0.0206811	0.00161273	0.0257524	0.0257855	0.00859861	0.0593712	0.158157	0.0383521	0.0372606	0.00692339	0.394451	0.98451	0.370706	0.694258	0.223486	0.700671	0.811117	0.893704	0.565964	0.205146	0.0453143
BMI-rs12879453	G	A	0.114083	0.0176095	-0.0103648	0.000348288	-0.016802	0.00804687	-0.00811294	-0.0257763	-0.176808	0.00424214	0.0077417	0.00785276	0.0213705	0.0208195	0.00162015	0.0258669	0.0259007	0.00861976	0.059138	0.158097	0.038477	0.0374598	0.00699365	0.409935	0.618597	0.829789	0.515979	0.756043	0.346602	0.662934	0.26342	0.91221	0.83627	0.261507
BMI-rs12880641	G	T	0.00218634	-0.0572797	0.0166872	0.00115357	0.0193613	-0.0326314	0.0139424	-0.116797	0.0334678	-0.00733814	-0.031469	-0.00354333	0.0285802	0.0183418	0.0017062	0.0272339	0.0272624	0.00907351	0.0625273	0.170607	0.0405533	0.0394521	0.00735199	0.0450525	0.362933	0.498976	0.47713	0.231332	0.124391	0.0617711	0.844478	0.856407	0.425074	0.629838
BMI-rs12956553	G	A	0.0232521	0.0662012	0.0104702	0.00239512	-0.00659653	0.0795475	0.00661002	0.110172	0.476535	0.0456808	0.0278624	0.00724592	0.076188	0.0216316	0.00247414	0.0394853	0.0394951	0.0131695	0.08973	0.239767	0.0585093	0.0569418	0.0106323	0.384892	0.628369	0.333015	0.867321	0.0439991	0.615725	0.219518	0.0468691	0.434954	0.62462	0.495555
BMI-rs13107325	C	T	0.99441	-0.126661	-0.00432886	0.00514003	0.0591747	-0.00208281	0.0246504	0.104619	-0.00624321	0.0140442	-0.0544926	0.0068613	0.123961	0.0259937	0.00308011	0.0490606	0.0491925	0.0163564	0.108162	0.301053	0.0736478	0.0719202	0.0131285	0.306884	0.867736	0.0951625	0.227759	0.966228	0.131792	0.333422	0.983455	0.848765	0.448643	0.601236
BMI-rs13143549	G	A	0.0315765	0.0054894	0.0403905	0.00210469	0.0711879	-0.00709765	0.0233426	0.0326625	0.0371966	0.0432911	0.0330234	-0.00294883	0.0217882	0.0205702	0.00162739	0.0259688	0.0260051	0.00864253	0.0593955	0.160002	0.0386551	0.0375978	0.00706303	0.801084	0.0495838	0.195913	0.00612027	0.784905	0.00691575	0.582377	0.816169	0.262744	0.379764	0.676312
BMI-rs13163306	G	A	0.130501	-0.00981047	0.00466557	-0.00273369	-0.0182084	-0.0122136	-0.0255164	0.0479687	0.0783262	0.0106849	0.000843852	0.000108444	0.0220331	0.0201527	0.00161779	0.0258331	0.0258669	0.00861015	0.0593211	0.158745	0.038362	0.0373062	0.00698863	0.656132	0.816918	0.0910726	0.480907	0.636806	0.00304161	0.41873	0.621724	0.780607	0.981954	0.98762
BMI-rs13176429	C	T	0.0185912	-0.0195537	-0.0291435	-3.60052e-05	-0.0123291	-0.0166325	-0.0117411	-0.105642	0.328044	-0.0552993	-0.00133899	0.0127395	0.0305685	0.018222	0.00174333	0.027789	0.0278425	0.00926599	0.0642174	0.165169	0.0414411	0.0403009	0.0075275	0.52239	0.109743	0.983522	0.657282	0.550256	0.205115	0.0999579	0.0470213	0.182072	0.973495	0.0905721
BMI-rs13208757	C	T	1	-0.010098	-0.0170729	0.00150518	-0.0315439	0.00335057	0.000433766	-0.0994371	-0.0907898	0.0315597	-0.0448203	-0.00366011	0.0215684	0.0207969	0.00162992	0.0260071	0.026043	0.00867545	0.0597572	0.159265	0.0387492	0.0376618	0.0070353	0.639652	0.411686	0.355764	0.225171	0.897631	0.960123	0.0961097	0.568641	0.415383	0.23402	0.602891
BMI-rs1321432	C	A	0.00262414	0.023508	-0.0202753	-0.00209928	-0.0350343	-0.00393891	-0.0326816	-0.0491962	0.34296	-0.0222641	-0.0368377	-0.000462892	0.0266046	0.0187197	0.00167975	0.0268684	0.026908	0.00895357	0.062059	0.166708	0.0399233	0.0387648	0.00721551	0.376908	0.278765	0.211388	0.192261	0.883618	0.000262177	0.427935	0.0396635	0.57707	0.341967	0.948849
BMI-rs13265241	A	C	0.0326216	0.137757	-0.090354	0.00109991	0.0110931	-0.0250743	0.00389513	-0.0121082	-0.124142	0.0478301	0.033109	-0.00350076	0.0309442	0.0184126	0.0017611	0.0281073	0.0281495	0.00936522	0.0646046	0.172558	0.0417851	0.0406426	0.00758917	8.51919e-06	9.24525e-07	0.53226	0.693088	0.373063	0.677473	0.851331	0.471883	0.252349	0.41528	0.644596
BMI-rs13287531	A	G	0.0317758	0.00744371	-0.0167684	0.00105935	-0.00831329	-0.0191946	0.000964915	-0.027024	-0.109231	0.0612804	0.0645879	-0.00385598	0.0279453	0.0184088	0.0016964	0.0270909	0.0271141	0.00900416	0.0618204	0.165832	0.0402858	0.0391214	0.0073082	0.789956	0.362354	0.532321	0.758945	0.478995	0.91466	0.662012	0.510097	0.128226	0.0987486	0.597761
BMI-rs13294945	T	G	0.0150825	-0.00544562	-0.00793987	-0.000655184	-0.0314668	-0.0075924	-0.0190584	-0.0667898	0.215873	-0.0561272	-0.0224337	0.00885708	0.0274202	0.0188175	0.0017104	0.0272651	0.027301	0.00909977	0.06337	0.171891	0.0406156	0.0395322	0.00740204	0.842577	0.673069	0.701677	0.248457	0.780936	0.0362271	0.2919	0.209165	0.167001	0.57039	0.231475
BMI-rs13296413	C	T	0.00341108	0.0328561	0.0190231	-0.000862943	-0.0405314	0.00215904	-0.0124006	0.0876263	0.0697316	0.0190017	0.00644739	0.0126826	0.025746	0.0187575	0.0016602	0.0265269	0.0265661	0.00885521	0.0613051	0.164121	0.0395099	0.0384132	0.00716951	0.201899	0.310507	0.603214	0.126529	0.935227	0.161404	0.152905	0.670925	0.630563	0.866707	0.0769018
BMI-rs1336486	T	G	0.0129636	0.00119902	-0.00773361	0.000330769	-0.0313073	-0.0139929	0.0136777	0.0487182	0.14803	-0.0886019	-0.0572442	-0.00701089	0.029421	0.0183485	0.00172327	0.0275409	0.0275721	0.00921366	0.0628624	0.166147	0.0410148	0.0398391	0.00750644	0.967492	0.673402	0.847788	0.255642	0.611802	0.137676	0.438342	0.372952	0.0307553	0.150753	0.350314
BMI-rs13414109	A	C	0.00836785	-0.0405939	0.0425551	-0.00312517	-0.00866314	0.0185969	-0.0317329	-0.0532118	0.0734258	-0.0259668	0.0460995	-0.0157137	0.125236	0.0262903	0.00311644	0.0496562	0.0498276	0.0165405	0.116421	0.308368	0.0739441	0.0721393	0.0134709	0.745833	0.105522	0.315958	0.861502	0.708981	0.0550492	0.647625	0.811795	0.725463	0.522802	0.243419
BMI-rs13427822	A	G	0.00169222	0.0479188	0.00534273	7.06618e-05	0.0129687	0.0294059	-0.0181219	0.0167821	0.000710416	0.0538728	0.056211	-0.00881996	0.0359559	0.0186034	0.00185999	0.0296967	0.0297327	0.009899	0.068175	0.185958	0.0442036	0.0430078	0.0080017	0.182628	0.773967	0.969695	0.662327	0.322659	0.0671489	0.805557	0.996952	0.222944	0.191216	0.27035
BMI-rs1409159	A	C	0.00546009	-0.00351475	0.00353531	-0.000531214	0.00014029	0.0235272	0.0151917	-0.0771397	0.11705	-0.108262	0.00290396	-0.0121326	0.0400903	0.0185536	0.00191419	0.0305688	0.03059	0.0102059	0.0705812	0.183751	0.0454765	0.044184	0.00826782	0.930138	0.848881	0.781386	0.996338	0.441826	0.136616	0.274429	0.524124	0.0172855	0.947597	0.142256
BMI-rs141071629	A	AAT	0.00432259	0.068239	-0.00418735	-0.00103651	0.0342533	-0.0361934	-0.000357257	0.00364279	-0.402878	0.023977	0.00642317	0.0171023	0.0584342	0.0201971	0.00222989	0.0355589	0.0356429	0.0118826	0.082981	0.221584	0.0528932	0.0516296	0.00963043	0.242891	0.835757	0.642058	0.335406	0.309896	0.976015	0.964985	0.0690387	0.650326	0.900992	0.0757575
BMI-rs1421085	T	C	0.134748	-0.0923378	-0.0385947	0.00406023	-0.00125587	-0.10552	0.0565626	-0.23411	-0.197116	-0.0474891	-0.134756	-0.023624	0.0249902	0.0193016	0.00164573	0.0262964	0.026327	0.00874714	0.05985	0.156996	0.0389639	0.0379355	0.00704291	0.000219966	0.0455485	0.0136204	0.961909	6.1238e-05	1.00543e-10	9.17062e-05	0.20928	0.222923	0.000382059	0.0007959
BMI-rs1441264	A	G	0.68565	-0.0352627	-0.0158223	-0.00122987	-0.0374543	-0.0313606	-0.0148396	-0.0110892	-0.0607157	-0.0430267	0.0514119	0.00174967	0.0256157	0.01983	0.00171501	0.0273613	0.0273956	0.00913633	0.0633247	0.168406	0.040726	0.0395648	0.00738379	0.168636	0.424931	0.473302	0.171038	0.252321	0.104325	0.860988	0.71845	0.290746	0.193796	0.812687
BMI-rs144819652	C	T	0.0231322	0.03874	-0.0114683	0.00169008	-0.0440231	-0.0153161	0.00215943	-0.135709	-0.426417	-0.00729215	-0.0151354	-0.0161849	0.0595758	0.0203088	0.00224235	0.0358909	0.0359589	0.0119768	0.0828736	0.218382	0.0534811	0.0523011	0.0097473	0.515523	0.572283	0.451023	0.219981	0.670156	0.856916	0.10152	0.050866	0.891545	0.772284	0.0968268
BMI-rs1454687	G	C	0.00708706	0.0186245	0.0155416	0.000904738	0.0310371	-0.00550424	0.00914966	-0.119855	-0.282257	0.0379452	0.0231146	0.0156217	0.0214478	0.0205757	0.00161676	0.0257527	0.0257855	0.00859663	0.0593704	0.159016	0.0383864	0.037319	0.0069631	0.385195	0.450048	0.575754	0.228127	0.830966	0.287179	0.0435125	0.0758941	0.322906	0.535668	0.0248659
BMI-rs146400366	G	GGGTGACTT	0.00226157	-0.00437854	0.013272	-0.00172216	0.0192666	-0.0617465	0.00553152	-0.21885	-0.188298	-0.020495	-0.0123231	0.00872669	0.0313196	0.0182861	0.0017605	0.0280905	0.0281287	0.0093607	0.0644086	0.16997	0.0417666	0.040654	0.00752521	0.888817	0.467962	0.327966	0.492793	0.0281544	0.554568	0.000679329	0.267934	0.623637	0.761798	0.246189
BMI-rs1465900	A	C	0.00284987	0.0478991	-0.0107138	0.000244225	-0.0784402	-0.00847473	-0.0298781	0.0697734	0.303799	-0.00952433	0.0915856	0.00327959	0.0454999	0.0191254	0.00202124	0.0322988	0.0323614	0.0107426	0.0750683	0.199631	0.0483298	0.0468594	0.00862564	0.292466	0.575354	0.903826	0.0151588	0.793416	0.00541507	0.352649	0.128061	0.843773	0.0506468	0.703787
BMI-rs146712725	GACCAATAGGAACAAAA	G	1	0.0476828	0.0243854	-0.000217973	0.0539677	-0.0294814	0.0361655	-0.0780492	-0.0501774	-0.0544017	-0.11428	-0.00853718	0.0297713	0.0192088	0.00178971	0.028475	0.0285179	0.00953171	0.0651382	0.176356	0.0423291	0.0412061	0.00766197	0.109237	0.204267	0.903064	0.058058	0.301238	0.000148143	0.230837	0.776009	0.198722	0.00554862	0.265184
BMI-rs1477290	T	C	0.00515384	-0.0930137	-0.00882366	0.00316238	-0.0267372	-0.0291341	-0.00507203	-0.110407	0.0120822	-0.0644359	-0.0823029	-0.000229675	0.0695605	0.0212123	0.00239179	0.0382218	0.0382502	0.0128076	0.0858382	0.224634	0.0564574	0.0548273	0.0103705	0.181171	0.677433	0.186109	0.484224	0.446256	0.692092	0.198365	0.957105	0.253739	0.133324	0.982331
BMI-rs148104233	G	A	0.00469896	0.0530068	-0.00504469	-0.000442241	-0.0768652	-0.0563984	-0.0228224	-0.0836289	0.164581	-0.0447601	0.00361422	0.00151432	0.039532	0.0187772	0.00192693	0.0307106	0.0307583	0.01025	0.0722281	0.192145	0.0459292	0.0445666	0.00826147	0.179968	0.788191	0.818476	0.012319	0.0667142	0.0259768	0.246929	0.391697	0.329787	0.935365	0.854563
BMI-rs148220617	T	TATAAC	0.0023021	-0.0209955	0.00159338	-0.00292924	-0.0696604	0.0409179	-0.0069354	0.0466056	0.183598	-0.0219415	-0.0510599	-0.00391125	0.0224964	0.0202425	0.00163386	0.0261506	0.026178	0.00871839	0.0599415	0.158895	0.0388409	0.0378599	0.00705668	0.350674	0.93726	0.0730002	0.00772639	0.118038	0.426329	0.436854	0.247902	0.572138	0.17745	0.579401
BMI-rs149884069	GAAAC	G	0.995399	-0.0155318	-0.00472168	0.00522409	-0.0122335	-0.0370053	0.0122438	0.0123458	0.412933	0.0691874	-0.0573634	0.00903738	0.0405291	0.0186079	0.00192458	0.0307182	0.0307713	0.0102293	0.0696022	0.18188	0.0454595	0.044332	0.00815887	0.701552	0.799692	0.00664004	0.690447	0.229137	0.231334	0.859212	0.0231866	0.128021	0.195684	0.268004
BMI-rs1521624	C	A	0.00345867	-0.00534017	-0.0184678	1.19993e-05	-0.000482054	0.0203364	0.0040836	-0.0180726	-0.0927724	0.039718	0.00650789	-0.00141724	0.0221166	0.0204811	0.00163566	0.026107	0.0261382	0.00870837	0.0598852	0.162239	0.0387248	0.0376586	0.00706669	0.809202	0.367216	0.994147	0.985268	0.43655	0.639122	0.762814	0.56744	0.30506	0.862799	0.84105
BMI-rs1559900	C	T	0.00313321	-0.14295	0.0736703	-0.00176887	0.0512473	-5.95304e-05	0.0133579	0.013692	-0.191637	-0.0445312	-0.010713	-0.000840924	0.0331484	0.0181668	0.00178604	0.0285068	0.028542	0.00952003	0.0651834	0.176809	0.0423494	0.0411685	0.00768625	1.61537e-05	5.01054e-05	0.321984	0.0722223	0.998336	0.160577	0.833626	0.278426	0.293022	0.794692	0.91288
BMI-rs1609303	A	T	0.00376177	-0.00651168	0.0062421	-0.000199694	-0.0478127	-0.00771588	-0.0370001	0.0072217	0.327674	-0.0435462	-0.076014	-0.0111441	0.026772	0.0187075	0.00168953	0.0269285	0.0269646	0.00898238	0.0619854	0.16425	0.0400997	0.0389737	0.00727432	0.807829	0.73863	0.905913	0.0758093	0.774764	3.8033e-05	0.907251	0.0460472	0.277504	0.0511314	0.125529
BMI-rs1609783	A	G	0.00981818	0.00688	-0.0124122	-0.00439736	0.0347198	0.0319784	-0.014482	0.0147619	-0.130023	0.0632856	0.0268897	0.00580177	0.0220683	0.0205373	0.00163858	0.0261162	0.0261494	0.00870314	0.0597029	0.159175	0.0387507	0.0377781	0.00706078	0.755223	0.545598	0.00728296	0.183705	0.221363	0.0961142	0.804711	0.414011	0.10244	0.476602	0.411255
BMI-rs163321	A	G	0.314396	-0.0024109	0.00229449	-0.000827634	-0.0596863	-0.0140037	-0.0139685	0.30729	0.388064	-0.00226582	0.0529008	0.00441239	0.0265414	0.0197915	0.00173779	0.0277853	0.0278254	0.0092625	0.0642808	0.170965	0.0412924	0.0402253	0.0075342	0.927623	0.907705	0.633892	0.0317048	0.614774	0.131537	1.7502e-06	0.023218	0.95624	0.188474	0.558113
BMI-rs1652376	G	T	0.0180996	-0.0220988	-0.023183	0.000258682	0.00925284	0.00490748	-0.0198253	0.0887528	-0.00196051	0.0776898	0.034602	0.00353913	0.0221127	0.0201118	0.00161797	0.025824	0.0258497	0.00860721	0.0595979	0.157716	0.0383523	0.0372499	0.00698884	0.317616	0.249032	0.872975	0.720116	0.84943	0.0212605	0.136437	0.990082	0.0427985	0.352934	0.612579
BMI-rs16846100	C	A	0.00365464	-0.0541454	-0.00456232	0.000500015	0.0170526	-0.0296498	0.0115781	-0.0237316	0.203308	0.0417899	-0.01799	0.0104221	0.0359464	0.0183604	0.00184067	0.0294431	0.0294808	0.00983129	0.0668999	0.179017	0.0435617	0.0424555	0.00795473	0.131997	0.803758	0.785892	0.562473	0.314545	0.238926	0.72279	0.256087	0.337395	0.671758	0.19014
BMI-rs16940823	C	A	0.162962	-0.0162335	0.00927403	-0.00205806	-0.0782429	-0.0235031	-0.0275393	0.153745	-0.294725	0.0561338	0.0459977	-0.00740797	0.0509604	0.0194278	0.00210644	0.0335795	0.0335926	0.0111974	0.0767182	0.204675	0.0498783	0.0486685	0.00905239	0.750067	0.633108	0.328555	0.0198027	0.484147	0.0139161	0.0450686	0.149878	0.260414	0.344598	0.413162
BMI-rs17025214	C	T	0.206012	-0.0169589	-0.017642	0.000460624	0.0350086	0.00609329	0.00425789	0.132387	0.158001	-0.00581433	0.0256932	0.00543604	0.0307184	0.018245	0.00174705	0.0278584	0.0278977	0.00928586	0.064643	0.169376	0.0414988	0.0403501	0.00754759	0.580895	0.33357	0.792044	0.208877	0.827106	0.646569	0.0405635	0.350902	0.888575	0.524284	0.471382
BMI-rs17132130	G	C	0.00754114	0.0106459	-0.0229183	-0.00350055	-0.0599035	-0.0663089	-0.0126469	-0.0553909	-0.174589	-0.0652939	0.0112757	-0.00450475	0.0427707	0.0187173	0.00195929	0.0312822	0.0313321	0.0104518	0.0725764	0.189998	0.0467064	0.0453226	0.00846232	0.803433	0.220784	0.0739967	0.0555012	0.0343184	0.226273	0.44534	0.358151	0.162126	0.803525	0.594498
BMI-rs1724557	A	C	0.11811	-0.00935227	0.00439753	0.000296734	-0.00854925	-0.0411298	0.00737804	-0.0693926	0.0670334	-0.0103979	0.0112636	-0.00427015	0.0243451	0.0192007	0.00164774	0.0262999	0.026335	0.00877038	0.0606874	0.161104	0.0390984	0.0380161	0.007116	0.700864	0.818846	0.857086	0.74513	0.118339	0.400211	0.252856	0.677346	0.790285	0.767013	0.548456
BMI-rs17399739	A	G	0.994184	-0.0242676	0.122209	0.0021064	0.082026	-0.0077373	0.0304387	-0.0956729	-0.0407148	-0.0490369	0.0220211	-0.0161388	0.131104	0.0268233	0.00318675	0.0509057	0.0509602	0.0171091	0.118016	0.308686	0.0760768	0.0736763	0.0138086	0.853149	5.21432e-06	0.50862	0.107109	0.879321	0.0752249	0.41755	0.895066	0.519206	0.765025	0.242505
BMI-rs17716502	C	T	0.0275267	0.208095	-0.112827	-0.000532801	-0.0395973	0.0193327	-0.0161542	0.0717147	0.119387	-0.019113	0.0307524	0.00806252	0.0459903	0.0190374	0.00202599	0.0322853	0.032321	0.0107888	0.074754	0.193402	0.0483697	0.0468831	0.00870063	6.04889e-06	3.09656e-09	0.792564	0.220019	0.549743	0.134313	0.337387	0.537039	0.692738	0.511865	0.354105
BMI-rs17770336	C	T	0.00559381	-0.0318828	0.000531499	0.000971287	0.0114327	0.0213844	0.00709991	0.134789	0.164061	0.0522524	0.0385104	-0.000967616	0.0295282	0.0182757	0.0017211	0.027456	0.027495	0.00914266	0.0626217	0.166991	0.0408013	0.0396613	0.00741888	0.280259	0.976799	0.572522	0.677118	0.436714	0.437413	0.0313641	0.325877	0.200316	0.331559	0.896229
BMI-rs17776719	A	G	0.0456153	0.0393497	0.0111106	-0.00133353	0.0351407	-0.0105345	0.0269636	-0.146371	0.241867	-0.0373733	-0.0773612	-0.0122722	0.0668314	0.0208659	0.00234955	0.0374738	0.0375221	0.0124967	0.0850622	0.232771	0.0559875	0.0545257	0.0102492	0.556002	0.594398	0.57033	0.348378	0.778898	0.030956	0.0852976	0.298769	0.504436	0.155959	0.231159
BMI-rs17806379	C	T	0.00174291	-0.0224764	-0.0034787	-0.0017927	-0.0199695	0.0162772	-0.0204195	-0.0295225	0.276058	-0.0174601	-0.0227848	0.00285613	0.0505455	0.0193976	0.00208825	0.0334155	0.0334647	0.0111788	0.0773896	0.20773	0.0499385	0.0486753	0.00897771	0.656554	0.857674	0.390632	0.550099	0.626685	0.0677577	0.702848	0.183873	0.726616	0.639715	0.750383
BMI-rs1799507	G	A	0.0357501	-0.0151044	-0.011004	-0.00189394	0.0436086	0.011387	0.0102469	0.0278459	0.157646	0.0357122	0.00348288	-0.0167256	0.0639966	0.0206422	0.00230728	0.0368444	0.036924	0.0122849	0.0841149	0.222582	0.0547176	0.0533175	0.00986433	0.813418	0.593977	0.41173	0.236577	0.757786	0.404223	0.740611	0.478783	0.513974	0.947917	0.0899711
BMI-rs1800437	G	C	0.0774372	0.0371405	-0.00142268	-0.000940612	0.00164874	-0.0560781	-0.0316562	0.201792	-0.0790654	-0.00560699	0.118189	0.0160808	0.0479485	0.019124	0.00204747	0.032625	0.0326772	0.0108507	0.0742327	0.202991	0.0486809	0.0472349	0.00881874	0.438582	0.940698	0.645946	0.959695	0.0861405	0.00352958	0.00656079	0.696905	0.908304	0.0123449	0.0682338
BMI-rs1840660	G	A	0.0933679	-0.00958603	0.00672945	-0.00159266	0.0655318	-0.0064309	0.0175315	-0.085409	-0.0407906	0.00482519	0.00609807	0.000591603	0.0255719	0.0190014	0.00167082	0.0266874	0.0267136	0.00891631	0.060945	0.16028	0.0395651	0.0384728	0.00719066	0.707761	0.723223	0.34048	0.0140683	0.809761	0.0492735	0.161092	0.799113	0.902934	0.87406	0.934429
BMI-rs1880802	A	G	0.0264674	0.0107294	0.0111981	-0.00229306	0.012819	-0.0191612	-0.00156363	-0.0484207	-0.195089	-0.0485508	-0.0464228	-0.00361306	0.0264674	0.0187086	0.0016788	0.0267949	0.0268296	0.00891787	0.0620171	0.162893	0.0399332	0.0387289	0.00721966	0.685198	0.549472	0.171973	0.632357	0.475116	0.860815	0.434943	0.231055	0.224062	0.230661	0.61676
BMI-rs188955288	C	T	0.0453083	-0.0289849	-0.0110803	-0.00267208	0.00348533	0.00646176	-0.0271219	0.0902818	0.108319	0.0861191	0.100218	-0.00884542	0.0505046	0.0194577	0.00209921	0.0334804	0.0335533	0.0112028	0.077493	0.205049	0.0500612	0.0486155	0.00903944	0.566032	0.569047	0.203054	0.917089	0.847287	0.0154791	0.244007	0.597321	0.0853842	0.0392621	0.327811
BMI-rs189383553	T	A	0.0191551	0.0796012	-0.010096	-0.00281638	0.00640565	0.116259	-0.0123776	-0.21	-0.605978	0.00857512	-0.0747746	-0.0198342	0.168684	0.0301548	0.00363242	0.0579787	0.058013	0.0192417	0.132119	0.356397	0.0858314	0.0835104	0.0155292	0.637002	0.737773	0.438136	0.912026	0.0450695	0.520049	0.111953	0.0890778	0.920419	0.370579	0.201526
BMI-rs1915110	C	A	0.00516438	0.0277626	0.00648108	-0.000724721	-0.010148	0.0380882	-0.0227358	0.219349	0.0737888	0.0758246	0.0883851	0.00588486	0.0372535	0.01837	0.00186551	0.0297185	0.0297645	0.00989425	0.0689499	0.184308	0.0441186	0.0430401	0.00800431	0.456131	0.724233	0.697658	0.732749	0.200668	0.0215695	0.00146642	0.688895	0.0856794	0.0400208	0.462212
BMI-rs199569565	T	TAG	0.0445332	0.0180826	-0.00502328	-0.00290845	-0.0358692	-0.00659857	-0.0110482	0.113904	0.227461	-0.0455412	-0.0169709	0.00271279	0.0221396	0.0202543	0.0016271	0.0259602	0.0259932	0.00865696	0.0598512	0.162388	0.0386183	0.037542	0.00701646	0.414069	0.804126	0.0738565	0.167065	0.799606	0.201877	0.0570256	0.161296	0.238295	0.651232	0.699029
BMI-rs2020942	C	T	0.00243821	0.0347736	-0.0154605	-0.00184837	0.0165199	-0.0305049	0.00644767	-0.0869764	-0.223418	-0.0444597	-0.0419401	0.00348456	0.0250659	0.0189333	0.00165603	0.0264225	0.0264436	0.00879493	0.0609433	0.161609	0.0392605	0.0380809	0.00715449	0.165357	0.414171	0.26436	0.531827	0.248672	0.463491	0.153532	0.166833	0.257456	0.27075	0.626227
BMI-rs2066295	A	G	0.0910079	0.0405317	-0.00458447	0.001602	-0.00885349	-0.0171092	0.00946171	-0.0687406	-0.0811471	-0.0248423	-0.0432614	-0.00230608	0.0406917	0.0185375	0.00192114	0.0306593	0.0306907	0.0102244	0.0710782	0.187434	0.0457685	0.0445868	0.00826182	0.319219	0.80467	0.404349	0.772758	0.577206	0.354758	0.333489	0.665061	0.587281	0.331912	0.780149
BMI-rs2072413	C	T	0.00462025	0.048545	0.0036021	0.000409089	-0.0183212	-0.0193846	-0.0235233	0.187085	-0.0523016	0.0676736	-0.00729795	0.00387826	0.0351577	0.0183449	0.00182342	0.0292011	0.0292588	0.0097539	0.0682328	0.183116	0.0434861	0.0423391	0.00789247	0.167348	0.844333	0.822484	0.530389	0.507636	0.0158801	0.0061097	0.775169	0.11966	0.863148	0.623154
BMI-rs2076603	A	G	0.328165	-0.0297764	-0.00487493	-0.0033682	0.0232955	0.0180086	0.0132908	-0.0666927	-0.245123	-0.0537367	-0.0481422	-0.00802599	0.0274046	0.0184413	0.00168923	0.0269235	0.0269611	0.00896674	0.0616867	0.161063	0.0399576	0.0388683	0.00729299	0.277238	0.791512	0.0461609	0.386903	0.504168	0.138278	0.27963	0.128033	0.178678	0.215496	0.271113
BMI-rs215632	G	A	0.00310514	0.0154855	0.000582341	0.00221246	-0.0518318	0.0117527	0.0101399	-0.0683667	-0.509429	-0.0371402	-0.0348824	0.00615488	0.0265622	0.0186895	0.00168002	0.0268226	0.0268578	0.00894919	0.0614255	0.162827	0.0399172	0.0388121	0.00721786	0.5599	0.975143	0.187865	0.0533123	0.661684	0.257192	0.265709	0.00175629	0.352148	0.368787	0.393811
BMI-rs2172131	C	T	1	-0.107419	0.0941598	-0.000618417	0.029053	0.0257877	0.00910092	-0.0455459	-0.263105	-0.0375269	-0.0238409	-0.00882139	0.023888	0.0192222	0.0016381	0.0261295	0.0261693	0.00871001	0.0600329	0.160995	0.0388482	0.037779	0.00704257	6.90291e-06	9.66286e-07	0.705787	0.266189	0.324421	0.296079	0.448044	0.102209	0.33405	0.528001	0.21036
BMI-rs217671	A	G	0.00352059	-0.020175	-0.0155509	-0.00127823	-0.0373638	-0.0247111	-0.0048388	-0.148504	0.268594	-0.0467116	-0.0688358	-0.000400809	0.0346455	0.018228	0.00181188	0.0289478	0.0289818	0.00964992	0.0663523	0.176026	0.0429099	0.0416589	0.00784238	0.560346	0.393588	0.480518	0.196799	0.393858	0.616066	0.0252145	0.127042	0.276334	0.0984613	0.959239
BMI-rs2187449	A	G	0.0842037	0.0139576	-0.011258	-0.00391002	0.000142673	0.0258099	-0.0118591	-0.112067	-0.371067	-0.0764377	-0.0505178	0.00439978	0.0409456	0.0187086	0.00194209	0.0309253	0.0309528	0.0103368	0.071708	0.190169	0.0460017	0.04468	0.00832915	0.733194	0.547337	0.0440844	0.996319	0.404367	0.251272	0.118097	0.0510293	0.0965894	0.258201	0.597335
BMI-rs2198234	T	G	0.000897328	0.000125237	-0.01024	-0.000560003	-0.0528266	-0.0590237	-0.0157141	0.00253482	0.27838	-0.0248789	0.0220524	0.00598447	0.0218747	0.0203438	0.00162278	0.0258531	0.0258903	0.0086046	0.0591048	0.154055	0.0383926	0.0373748	0.00698975	0.995432	0.61472	0.730028	0.0410202	0.0226229	0.0678147	0.965792	0.0707603	0.516977	0.555169	0.391901
BMI-rs2234458	T	C	0.0290316	0.000521537	-0.0147727	0.00272585	0.0338746	-0.0613089	-0.00811526	0.0487264	-0.121757	0.0680526	-0.0741954	0.00898303	0.0269528	0.0185077	0.00167855	0.0267773	0.0268128	0.0089241	0.0618223	0.166022	0.0398138	0.0387447	0.00719121	0.984562	0.42476	0.104392	0.205854	0.0222228	0.363159	0.430599	0.46333	0.0874025	0.0554967	0.211606
BMI-rs2241420	G	A	0.0467391	-0.037673	0.00448401	-0.00248329	-0.0588711	-0.0150464	-0.0321622	0.212055	0.216241	0.0526258	0.0428381	-0.0044881	0.0413628	0.0186351	0.00193029	0.0308364	0.0308949	0.0102785	0.0708975	0.186679	0.0460329	0.0446945	0.0083262	0.362404	0.809849	0.198276	0.0562451	0.626246	0.00175371	0.00278082	0.24672	0.252948	0.33783	0.589864
BMI-rs2253310	G	C	0.00326135	0.0268297	-0.0259524	-0.00296177	-0.0266588	0.0253899	-0.0171019	-0.0467792	-0.446115	-0.0434284	0.0216895	0.00200785	0.026412	0.0186384	0.00167263	0.0267188	0.0267557	0.00889546	0.0621892	0.167026	0.0398383	0.0386408	0.00721174	0.309719	0.163797	0.0766063	0.318398	0.342644	0.0545385	0.451927	0.00756467	0.275664	0.574586	0.780694
BMI-rs2281997	C	T	0.176122	-0.0137533	0.017763	0.0014659	0.0296263	0.00950273	0.0111252	-0.109002	-0.501343	-0.0862094	-0.0805653	-0.00381953	0.0297931	0.0184041	0.00173352	0.0277151	0.0277455	0.00924018	0.0633116	0.166309	0.0410598	0.039926	0.00746618	0.64435	0.334465	0.397764	0.28509	0.731978	0.228589	0.0851302	0.00257405	0.0357649	0.043607	0.608948
BMI-rs2289379	C	T	0.0714073	0.00333099	0.00431675	-0.00277015	-0.00382858	-0.0120376	-0.0156807	0.00991487	0.0179741	-0.0205265	0.0371571	0.0147122	0.0252226	0.0190531	0.00166209	0.0265624	0.0265947	0.00884923	0.0610123	0.160302	0.0394774	0.038434	0.00719022	0.894934	0.820763	0.095581	0.885394	0.650815	0.0763976	0.870907	0.910723	0.603096	0.333657	0.0407446
BMI-rs2307111	T	C	0.2048	-0.0281748	-0.0109457	-0.000490134	-0.0514971	-0.0115928	-0.0236664	0.0287314	-0.155799	0.0106319	0.0250041	0.00536339	0.0252194	0.0188856	0.00165563	0.0264099	0.0264361	0.0088167	0.0603762	0.155588	0.0392039	0.038286	0.00714717	0.263915	0.562199	0.767199	0.0511871	0.66101	0.00726939	0.634165	0.316654	0.786241	0.5137	0.453002
BMI-rs2331933	T	G	0.087103	0.075878	-0.11402	0.00244164	0.017185	-0.0455938	0.0267441	-0.0755118	-0.0388971	-0.020446	-0.0155177	-0.00331435	0.0285802	0.0187982	0.00172601	0.027531	0.0275676	0.00917238	0.0629423	0.165845	0.0407731	0.0397333	0.0074185	0.00793345	1.3176e-09	0.157182	0.532494	0.0981511	0.00354903	0.230257	0.814567	0.61605	0.696133	0.655043
BMI-rs2371743	G	A	0.00946644	0.00228389	-0.00861609	-0.000491459	0.0173287	0.010737	0.00610143	-0.183556	-0.264439	-0.0698225	-0.0949142	0.00154541	0.0230357	0.0196168	0.00162879	0.0259729	0.0260066	0.00868556	0.0598316	0.159587	0.0385552	0.0375871	0.00705006	0.921023	0.660502	0.762857	0.504654	0.679713	0.482381	0.0021561	0.0975177	0.0701466	0.0115649	0.826491
BMI-rs2396625	T	A	0.0131482	0.00120056	-0.0165996	-0.000710108	-0.0350255	-0.0261541	-0.00460362	-0.12398	-0.262766	-0.044447	0.0223143	-0.0146801	0.0241195	0.0195333	0.00165637	0.026434	0.0264686	0.00881223	0.060944	0.161744	0.0392818	0.0382295	0.00717557	0.960301	0.395431	0.668132	0.185167	0.323096	0.601384	0.0419195	0.104254	0.25785	0.559427	0.0407738
BMI-rs2399213	T	C	0.00729791	-0.042396	0.000762152	0.000825623	-0.0278484	-0.0142245	0.0130656	-0.0351799	0.116654	-0.0638641	-0.0872645	0.00362092	0.0513805	0.0194957	0.0021119	0.0336808	0.0337293	0.0112345	0.0767032	0.206076	0.0499394	0.0487605	0.00914298	0.409295	0.968816	0.695843	0.408334	0.673226	0.244835	0.646486	0.571345	0.200958	0.0735111	0.692082
BMI-rs2450445	G	A	0.106604	0.0991019	-0.0774328	0.000147336	-0.0454309	0.00284924	-0.0128127	0.0853617	0.112332	0.0166943	-0.0264278	0.00982774	0.0296524	0.0182687	0.0017243	0.027547	0.0275839	0.00918844	0.0634182	0.164932	0.0409038	0.0398103	0.00743302	0.000831537	2.2504e-05	0.931906	0.0991048	0.91773	0.163188	0.1783	0.495822	0.683174	0.506792	0.186113
BMI-rs245769	T	C	0.00322243	-0.0238196	-0.00686724	-0.00298901	-0.0318806	0.0157319	-0.0301271	0.129468	-0.100289	0.0357744	-0.0232814	0.00665768	0.0347893	0.018244	0.00181291	0.0289913	0.0290516	0.00967132	0.0670864	0.177284	0.0431491	0.0421076	0.00788925	0.493545	0.706612	0.0992039	0.27148	0.588153	0.00183904	0.0536251	0.5716	0.407057	0.580332	0.398731
BMI-rs2482398	A	C	0.00387992	-0.0191013	0.0202141	2.93827e-05	-0.00103901	0.00521124	0.00869577	0.0774764	0.528768	-0.0334411	-0.0333969	0.00356594	0.0220031	0.0207001	0.00163748	0.0261299	0.0261641	0.00870896	0.0601854	0.163159	0.0388638	0.0377937	0.00701527	0.385329	0.328805	0.985684	0.968282	0.842126	0.318045	0.197992	0.00119201	0.389532	0.376879	0.611236
BMI-rs2516739	G	A	0.0150059	0.013412	-0.0230614	-0.00106716	-0.0229758	-0.0501089	-0.0142488	0.229211	0.205397	0.0430799	0.0618406	-0.00296286	0.0425497	0.0186407	0.00195098	0.0311612	0.0312074	0.0103863	0.0714185	0.195908	0.0462228	0.0450159	0.00843935	0.752604	0.216032	0.584387	0.460929	0.108347	0.170102	0.00133027	0.294438	0.351335	0.169522	0.725532
BMI-rs2605593	C	G	0.0165027	0.00778879	0.00488764	-0.0010556	-0.0484137	0.00381939	-0.00198526	-0.0201543	0.0994064	-0.011272	0.0172385	0.000612594	0.0216125	0.0205016	0.00161793	0.0258283	0.0258642	0.00861185	0.0594732	0.155815	0.0384029	0.0372765	0.00702142	0.718561	0.811568	0.514122	0.0608704	0.882603	0.817683	0.7347	0.523488	0.769126	0.64376	0.930476
BMI-rs2611742	T	C	0.0074218	0.0118002	0.0100368	0.00143658	-0.0389095	-0.0227924	-0.00239474	-0.0615038	0.054478	-0.0416864	-0.0539969	-0.00360776	0.0252042	0.0188467	0.00165603	0.0263964	0.0264308	0.00878365	0.0601287	0.162133	0.0392751	0.0381491	0.00708514	0.639653	0.594346	0.385678	0.14047	0.3885	0.785133	0.30637	0.736865	0.288511	0.156948	0.610613
BMI-rs2635727	C	T	0.0777315	-0.095258	0.0227463	-0.0024019	-0.00111506	0.0284923	-0.0364619	0.0632946	-0.242155	0.0732829	0.0424652	-0.0074123	0.0384405	0.0184814	0.00188525	0.0300285	0.0300956	0.0100273	0.0702877	0.184524	0.0448892	0.043616	0.00813744	0.0132103	0.21841	0.202649	0.970379	0.343778	0.000276668	0.367851	0.189413	0.10257	0.33025	0.362356
BMI-rs2644112	T	C	0.0038023	0.00796301	0.0240781	0.00161371	0.00132759	0.0653539	0.021673	-0.00832389	0.313836	-0.00340254	-0.0235368	-0.00128843	0.0284337	0.0184022	0.00170343	0.0272183	0.027244	0.00908359	0.0625902	0.16648	0.0404533	0.0392875	0.00733705	0.779435	0.190727	0.343472	0.961098	0.016448	0.0170358	0.894201	0.0594134	0.932969	0.549113	0.860604
BMI-rs2676421	G	T	0.00108156	0.117759	-0.0733318	9.60615e-06	-0.0342954	0.000427083	-0.00742023	0.034698	-0.00471941	-0.0497901	0.0182749	-0.00705741	0.0258065	0.0187361	0.00166423	0.0265719	0.0266143	0.0088808	0.0611417	0.160906	0.0395206	0.0384387	0.00722663	5.0413e-06	9.08258e-05	0.995395	0.196821	0.987197	0.403417	0.570374	0.976601	0.207725	0.634482	0.328777
BMI-rs2682909	G	C	0.00226255	0.00290276	-0.00256393	-0.00110607	-0.0434414	-0.0154658	-0.0187966	0.0374878	0.074347	-0.0576983	-0.0636233	0.0147537	0.0269504	0.018552	0.00168108	0.0268548	0.0268844	0.00896581	0.0613714	0.162331	0.0399376	0.0388945	0.00727977	0.914228	0.890081	0.510569	0.105742	0.56511	0.0360408	0.54131	0.646955	0.14854	0.101886	0.0426975
BMI-rs270689	T	A	0.000447295	-0.0184111	0.00733028	3.24481e-05	-0.0188205	0.0362897	0.0043447	-0.0311105	0.0715601	0.0373677	-0.0311316	0.00974569	0.0465531	0.0189717	0.0020258	0.0322773	0.0323253	0.0108089	0.0750077	0.203888	0.0481201	0.0466843	0.00874909	0.692484	0.699216	0.987221	0.559833	0.26159	0.687716	0.678315	0.725605	0.437425	0.504866	0.26532
BMI-rs2712667	C	G	0.000932944	0.00494335	0.012514	-0.000723753	0.0353076	0.0384917	0.00212341	-0.0193277	-0.26513	0.0160684	-0.0142142	0.00244154	0.0276069	0.0185498	0.00170102	0.0271055	0.027147	0.00904333	0.062752	0.167119	0.040254	0.0391575	0.0073196	0.857889	0.499922	0.670486	0.192714	0.156221	0.814361	0.758081	0.112634	0.689765	0.716605	0.73871
BMI-rs2815757	T	C	0.00258457	0.0999396	0.0104146	-0.00195767	0.0459932	0.0190145	-0.020524	0.131387	0.250928	0.054087	0.0802585	0.0100212	0.0477685	0.0191206	0.00204129	0.032601	0.0326448	0.0108264	0.0754422	0.204473	0.0487022	0.0472443	0.00877189	0.0364246	0.585975	0.337542	0.158307	0.560252	0.0579959	0.0815881	0.219752	0.266758	0.0893593	0.253282
BMI-rs28360478	G	A	0.00666434	0.0211779	0.0095238	0.00105887	0.0260971	0.0236192	0.0249075	-0.214525	0.0516628	-0.0317208	-0.0626139	0.00999422	0.0630573	0.0205444	0.00229976	0.0366244	0.036652	0.0121891	0.083698	0.219198	0.0542704	0.0528781	0.00993362	0.736983	0.642956	0.645209	0.476118	0.519304	0.0410117	0.0103752	0.813673	0.558888	0.236368	0.314369
BMI-rs28366156	T	C	0.146072	0.0212856	0.0438896	-0.00800105	-0.0556234	0.0551973	-0.00979694	-0.124219	-0.563878	-0.0367569	0.0390325	-0.00334988	0.0696084	0.0211939	0.00238447	0.0381452	0.0382573	0.0127	0.0894509	0.264049	0.056898	0.055067	0.0102605	0.759764	0.038373	0.000792372	0.144786	0.14908	0.440463	0.16493	0.0327205	0.518272	0.478438	0.74406
BMI-rs28545614	C	T	0.00874611	0.00386961	0.0101395	-0.00539335	0.0487994	0.0565982	0.0167538	-0.17441	-0.329722	-0.0336387	0.0390471	0.00890512	0.0590668	0.0201395	0.00222609	0.0355894	0.0356165	0.0118784	0.0807054	0.21931	0.0526978	0.0513324	0.00959128	0.947766	0.614638	0.0154026	0.17032	0.112038	0.158409	0.0306909	0.132725	0.523258	0.446854	0.353171
BMI-rs28605564	C	G	0.00324478	0.061212	0.00814451	0.000153063	-0.0380398	0.000542682	0.00547291	0.158699	-0.0515846	0.00276188	0.0100002	-0.00278467	0.0382825	0.0184533	0.00188822	0.0300699	0.0301273	0.0100122	0.0691206	0.181855	0.0447069	0.0434596	0.00817181	0.109831	0.658955	0.935393	0.205856	0.985629	0.584635	0.021678	0.776673	0.95074	0.818013	0.733281
BMI-rs2861691	G	C	0.0799093	0.0311388	0.0126906	0.00298426	-0.000428704	-0.00529919	-0.00656017	-0.000718009	-0.111118	-0.0227811	-0.00693457	0.01236	0.0253458	0.0188268	0.00165416	0.0264062	0.0264483	0.00881588	0.0609342	0.161251	0.0392179	0.0382225	0.00713898	0.219239	0.500268	0.0712178	0.987047	0.841199	0.456798	0.990598	0.490759	0.561318	0.856033	0.0833935
BMI-rs28726372	T	C	0.00460206	-0.0121081	-0.00160826	-0.00153282	0.0304899	-0.0289362	-0.00904163	0.0418959	0.030044	0.00953971	-0.0017855	0.00598725	0.0310366	0.0181882	0.00174732	0.0279047	0.027946	0.00929859	0.0636699	0.167917	0.0414935	0.040323	0.00749626	0.696446	0.92954	0.380356	0.274551	0.300467	0.33087	0.510527	0.857999	0.818163	0.964681	0.424467
BMI-rs2954021	G	A	0.0254241	0.0968618	-0.102677	-0.000361	0.00255084	0.00679023	-0.0012118	-0.0272517	-0.0622023	0.045301	0.0277819	0.0117026	0.0211491	0.0208143	0.00161459	0.0257669	0.0257957	0.00860624	0.059171	0.156189	0.0382264	0.0372065	0.00694242	4.65327e-06	8.10387e-07	0.823079	0.921141	0.792373	0.888024	0.645116	0.690447	0.23599	0.455248	0.0918621
BMI-rs2964023	C	T	0.999721	0.0106739	-0.00878837	-0.000961859	0.05864	0.0137239	0.0189589	0.0895479	0.179509	0.0860455	0.106152	-0.00117318	0.0310899	0.0182579	0.00175287	0.0279891	0.0280266	0.00933478	0.0645076	0.169032	0.0416352	0.0404456	0.00754377	0.731355	0.630271	0.583189	0.0361631	0.624366	0.0422567	0.165085	0.288245	0.0387685	0.00867699	0.876414
BMI-rs29944	G	A	0.0078269	-0.0148962	-0.0196757	-0.000558902	-0.0205618	0.0650156	-0.0134907	0.236947	0.187912	0.0846131	0.0650582	-0.00346048	0.0295896	0.0182819	0.00172882	0.0275517	0.027591	0.00918199	0.0639376	0.171333	0.0409217	0.0399928	0.00752632	0.614664	0.281822	0.74648	0.455489	0.0184533	0.141765	0.000210672	0.272744	0.0386713	0.103793	0.645672
BMI-rs3006942	C	G	0.0085613	0.158832	0.0106335	-0.004678	-0.0131469	-0.0195962	0.0171633	-0.119311	-0.443753	-0.0789125	-0.0715664	-0.0157115	0.0717032	0.0212572	0.00241894	0.0385065	0.0385815	0.0128356	0.0886264	0.234419	0.0573499	0.055603	0.0104535	0.0267522	0.616915	0.0531257	0.732787	0.611512	0.181169	0.178231	0.0583597	0.168829	0.198062	0.132843
BMI-rs3021500	C	G	0.0197975	-0.14637	0.139871	0.00341064	-0.0047188	-0.0142137	0.0169265	-0.0928861	0.163456	0.0119874	-0.0271366	-0.0122225	0.0216931	0.0206474	0.00162646	0.0259768	0.0260094	0.00865156	0.0599372	0.160379	0.0385759	0.0374816	0.00700127	1.50967e-11	1.25314e-11	0.0359974	0.855854	0.584734	0.0504114	0.121209	0.308115	0.755993	0.469069	0.0808552
BMI-rs3130048	T	C	0.958737	0.092053	-0.0216148	0.00416022	0.0939143	0.0260786	0.0320687	0.117064	0.211813	0.0156068	-0.0358361	-0.00404277	0.0337486	0.0182155	0.00179887	0.0286747	0.0286932	0.00955747	0.064501	0.164247	0.0426379	0.0414809	0.00768975	0.00637989	0.235378	0.0207407	0.00105617	0.363417	0.000792746	0.0695383	0.197192	0.714342	0.387634	0.599073
BMI-rs3174040	A	G	0.0482913	0.116206	-0.104334	0.000136544	0.0224394	0.00342535	-0.0251024	0.069558	0.241667	0.140646	0.120592	0.0138822	0.0461987	0.0190113	0.00202399	0.0322896	0.0323445	0.0107371	0.0742021	0.191742	0.0477817	0.0467365	0.00873332	0.0118922	4.06839e-08	0.946213	0.487093	0.91566	0.0193928	0.348547	0.207536	0.00324561	0.00987346	0.111934
BMI-rs3209570	G	A	0.0160517	0.0228583	0.00481933	0.0031458	-0.00983191	0.0487625	-0.0147842	0.0467077	0.294775	0.0858564	0.0859411	0.00227472	0.0253811	0.01932	0.00168568	0.0268397	0.0268803	0.00896856	0.061723	0.161238	0.040039	0.0389229	0.00729492	0.3678	0.803014	0.0620168	0.714127	0.0696701	0.0992618	0.449212	0.06752	0.0320086	0.027247	0.755176
BMI-rs329124	A	G	0.00958025	-0.00254973	-0.00275458	0.000807695	0.0100879	0.00865175	-0.00270124	0.176422	0.16463	0.0467224	0.00792277	0.00475913	0.0238894	0.0192658	0.00164067	0.0261356	0.0261699	0.00870839	0.0603019	0.160253	0.0388924	0.0377816	0.00705096	0.915003	0.886308	0.62251	0.69951	0.740948	0.756418	0.00343782	0.304275	0.229627	0.833903	0.499701
BMI-rs33485	T	C	0.00825165	0.0153247	-0.00461191	0.00238195	0.00646524	0.0257053	0.00820233	-0.0937455	-0.220789	-0.0349831	-0.02676	-0.00673474	0.0358028	0.018259	0.001831	0.0292584	0.0292872	0.00973048	0.0670795	0.172897	0.0435063	0.0422546	0.00793459	0.66863	0.80059	0.193294	0.825116	0.380108	0.399256	0.162256	0.201605	0.421344	0.526536	0.396004
BMI-rs34023581	GA	G	0.042301	0.0205462	0.00782093	0.00392601	0.00617564	-0.00702615	0.00694052	-0.0963768	-0.145156	-0.0564518	-0.0223311	0.00177872	0.0229756	0.0211403	0.00169397	0.0270481	0.0270868	0.00902091	0.0620855	0.165702	0.0401942	0.0390497	0.00728083	0.371183	0.711418	0.0204702	0.819398	0.795332	0.441668	0.120586	0.381028	0.160179	0.567416	0.806998
BMI-rs34141029	C	G	0.00552757	-0.345721	0.106099	0.00128074	0.0583477	0.0964044	0.0329282	-0.0751608	0.222136	-0.0281706	-0.0426655	0.00739382	0.117356	0.0256059	0.00302373	0.0483187	0.0483734	0.0160832	0.108993	0.27591	0.0713145	0.0694539	0.01302	0.00322032	3.42112e-05	0.671885	0.227218	0.0462712	0.0406226	0.490449	0.420761	0.692829	0.539019	0.570118
BMI-rs34147849	T	C	0.0178202	-0.123475	-0.0274227	-0.00118774	-0.052557	-0.0552078	-0.00849683	-0.0296206	-0.466597	-0.0832789	-0.0410286	-0.00506933	0.081918	0.0224117	0.00257166	0.0410594	0.0411498	0.0137576	0.0939073	0.254399	0.0609389	0.0594579	0.0110845	0.131735	0.221109	0.644182	0.200539	0.179717	0.536832	0.75244	0.0666379	0.171754	0.490167	0.64743
BMI-rs34260254	G	GT	0.00271456	-0.0359168	0.0157533	0.00296309	0.00405926	0.0170544	0.0171876	-0.0952995	-0.12962	-0.00464108	-0.0142699	-0.00810903	0.0250329	0.0192314	0.00166803	0.0266333	0.0266736	0.00886905	0.0607747	0.163389	0.0396071	0.0385687	0.00718529	0.15135	0.412704	0.0756694	0.878862	0.522579	0.052633	0.116864	0.427591	0.906719	0.711392	0.259085
BMI-rs34417222	C	T	0.0105798	-0.0352012	-0.0225749	-0.0022668	-0.00455361	0.00823244	-0.0182873	-0.0165599	-0.0488853	-0.0706297	-0.0455204	-0.00271919	0.0309793	0.0182314	0.0017519	0.0279323	0.0279787	0.00933041	0.0644369	0.166624	0.0415051	0.040425	0.00752431	0.255841	0.215627	0.195699	0.870501	0.768575	0.0500004	0.797184	0.769227	0.0888118	0.260147	0.717811
BMI-rs34517439	C	A	0.16178	-0.0661487	-0.00561539	8.81964e-05	-0.00748305	0.0712881	0.0225289	0.0370902	0.209895	-0.0355857	-0.0933632	0.0132534	0.077109	0.022053	0.00251354	0.0401135	0.040135	0.0133816	0.0920168	0.236467	0.0595477	0.0579767	0.0108376	0.39097	0.799008	0.972009	0.852016	0.0756996	0.0922655	0.686889	0.374741	0.550107	0.107322	0.221365
BMI-rs34772064	G	T	0.0033655	0.0155617	-0.00974615	0.00160832	0.0138168	-0.00396496	0.00380501	-0.119516	-0.0795955	-0.0316313	0.00179733	-0.00293243	0.0230016	0.0196768	0.00162762	0.0259868	0.0260225	0.00864722	0.0599609	0.156884	0.0386756	0.0375167	0.00700785	0.498694	0.620381	0.323086	0.594944	0.878898	0.659918	0.0462364	0.611909	0.413437	0.96179	0.675619
BMI-rs34811474	G	A	0.162554	0.0770762	-0.0028652	-0.00168051	-0.0578773	-0.0558866	-0.0345106	0.129296	0.453168	0.0168937	0.0104045	0.00427417	0.0402354	0.0184906	0.00191416	0.0304948	0.0305356	0.0101761	0.0701058	0.183988	0.0454895	0.04431	0.00828334	0.0554133	0.876858	0.379981	0.0577048	0.067219	0.000695625	0.065142	0.0137777	0.710357	0.814355	0.605858
BMI-rs34898535	C	T	0.0397091	0.00727471	0.00488446	-0.00238649	-0.0796564	-0.0358547	-0.0303072	0.0453229	-0.131974	0.00236767	0.00533288	0.00481777	0.0260543	0.0187044	0.0016649	0.02659	0.0266191	0.00888413	0.0613453	0.163073	0.0396778	0.0384818	0.00721624	0.780081	0.793985	0.151741	0.00273817	0.177997	0.00064644	0.460019	0.418347	0.952416	0.889781	0.504372
BMI-rs35076988	T	TATAG	0.0226376	0.0377552	0.0268437	0.00210017	0.0264069	0.040653	0.0269101	-0.309113	-0.276865	-0.141285	-0.127016	0.00651818	0.157978	0.0284576	0.00342514	0.0546321	0.0546699	0.0182311	0.126299	0.341978	0.0816054	0.0791227	0.014794	0.811113	0.345535	0.539769	0.628841	0.457114	0.13993	0.0143868	0.418171	0.0833968	0.10843	0.659506
BMI-rs35364449	C	T	0.0252738	-0.0870094	0.00151383	0.00059501	0.0776139	0.0476925	0.00772178	-0.0597066	-0.436973	-0.0839272	-0.114337	-0.00322217	0.0824066	0.0224588	0.00258393	0.0411811	0.0412323	0.0136983	0.0942122	0.25473	0.0612258	0.0595489	0.011266	0.291036	0.946259	0.81788	0.0594722	0.247405	0.572957	0.526247	0.0862668	0.170445	0.0548532	0.774873
BMI-rs35418151	C	A	0.00710912	0.0397554	0.00565077	0.000253954	-0.0171456	-0.00173043	-0.0132536	-0.013651	0.149349	-0.0559379	-0.00327813	0.00259074	0.0361868	0.0182821	0.0018383	0.0293791	0.0294298	0.00979692	0.0676919	0.174597	0.044002	0.0427095	0.00796485	0.271937	0.757255	0.890125	0.559491	0.953113	0.176111	0.84018	0.392334	0.203638	0.938819	0.744976
BMI-rs35449999	A	G	0.00153148	0.00677732	0.0212668	-0.00267805	0.0560451	0.0110374	0.00120674	0.1008	0.398652	0.00539334	0.0291181	0.0227831	0.0679113	0.0209533	0.00236578	0.0377162	0.037757	0.012575	0.0864071	0.227903	0.0562048	0.0546303	0.010166	0.920506	0.310125	0.257638	0.137288	0.770036	0.92355	0.243386	0.0802551	0.923554	0.594033	0.0250206
BMI-rs35487667	AT	A	0.347936	0.122289	-0.0952731	0.000381005	-0.00395607	-0.0108672	-0.0168849	0.129583	-0.12316	0.0725652	0.11471	0.012634	0.0274073	0.0187784	0.00170765	0.0272285	0.0272739	0.00908189	0.062449	0.168946	0.0404518	0.0395015	0.00733369	8.12665e-06	3.90736e-07	0.823445	0.884481	0.690302	0.0630025	0.0379864	0.466011	0.0728361	0.00368562	0.0849386
BMI-rs35535865	T	TTG	0.0429739	-0.0166602	-0.0182003	-0.000413216	0.0331459	-0.0277068	0.00804066	0.00581889	0.0397623	0.0409768	-0.0251084	0.00283329	0.0390077	0.0186955	0.00191499	0.030497	0.0305513	0.0101812	0.0697216	0.185094	0.0452205	0.043938	0.00821028	0.669306	0.3303	0.829159	0.277101	0.364463	0.429671	0.933487	0.829906	0.364854	0.567695	0.730027
BMI-rs35722922	A	G	0.00496539	-0.0150394	-0.0315357	0.00142085	-0.00916539	0.0186729	-0.0281868	-0.0390933	0.216608	-0.0113959	0.0265868	-0.010927	0.0258821	0.0188978	0.00166927	0.026728	0.0267629	0.0089163	0.0609456	0.160303	0.0397353	0.0386454	0.00720129	0.56119	0.0951677	0.394669	0.731664	0.485355	0.00157104	0.521233	0.17662	0.77427	0.491475	0.129178
BMI-rs35940744	A	AG	0.00100808	0.124538	-0.0862212	-0.000115515	-0.0326028	-0.0106086	-0.0171454	-0.178215	-0.0919239	-0.0402444	-0.0465785	-0.00341593	0.0267074	0.0185277	0.00167509	0.0267457	0.0267895	0.00893135	0.0621529	0.164946	0.0398575	0.0387479	0.00724087	3.11712e-06	3.26297e-06	0.945021	0.222848	0.692106	0.0548977	0.00413932	0.577325	0.312638	0.22933	0.637101
BMI-rs35957544	T	G	0.0186011	-0.141448	0.138594	0.00186796	0.0812377	0.0803868	0.0233072	-0.0421974	-0.0893342	0.0494942	0.0355058	0.00559703	0.0237383	0.0193395	0.0016378	0.0261586	0.0261941	0.00871347	0.0600881	0.161196	0.0389309	0.0377968	0.0070611	2.54689e-09	7.72308e-13	0.254065	0.00189923	0.00214876	0.00747693	0.482519	0.579445	0.203612	0.347533	0.427979
BMI-rs360791	G	A	0.209053	0.0172821	0.00660706	-0.00191084	-0.0626885	0.0108035	-0.0188739	0.0195689	0.0626872	-0.0201238	-0.0374909	0.00389999	0.0214821	0.0207595	0.00162133	0.0259134	0.0259471	0.00863326	0.0595294	0.158566	0.0384698	0.0375636	0.00698419	0.421114	0.750283	0.238572	0.0155572	0.677142	0.0288032	0.742362	0.692593	0.6009	0.318249	0.576571
BMI-rs36090025	A	C	0.00865238	0.127237	-0.104022	-0.001016	0.0103585	0.0495025	-0.00826019	0.267418	-0.357756	0.0610014	0.0340049	0.0100428	0.0319168	0.0182208	0.00177336	0.0282115	0.0282607	0.00943279	0.062429	0.16891	0.0416112	0.040763	0.00762432	6.70674e-05	1.13808e-08	0.566695	0.71349	0.0798371	0.3812	1.83993e-05	0.0341737	0.142655	0.404164	0.18777
BMI-rs362307	C	T	0.169123	0.0490116	-0.0149588	0.00336124	-0.00839775	0.0768327	-0.00900198	-0.16754	-0.0824592	-0.0977099	-0.0713842	0.016442	0.124665	0.026353	0.0031273	0.0498284	0.0499268	0.0163984	0.112907	0.296818	0.073869	0.0719307	0.0130895	0.694211	0.570286	0.282462	0.866164	0.123828	0.583037	0.137841	0.781158	0.185922	0.321003	0.209073
BMI-rs368727879	T	TA	0.00582729	0.11777	-0.00950311	-5.86867e-05	0.0112201	-0.0340458	0.011443	-0.226433	0.0666388	-0.203609	-0.0903005	-0.00746591	0.0712977	0.0213741	0.00242949	0.038656	0.0386669	0.012899	0.0863479	0.237056	0.0569722	0.0555015	0.0105085	0.0985764	0.656604	0.980728	0.771621	0.378595	0.375015	0.00873363	0.778627	0.00035191	0.103741	0.477417
BMI-rs369378388	CA	C	0.00124443	0.0226623	0.0186623	-0.00150324	0.0206848	0.0221751	0.00584949	0.0476101	0.311988	-0.0181071	0.00531071	-0.0164224	0.0289471	0.020242	0.00182843	0.0291455	0.0291837	0.00970671	0.0670487	0.176994	0.043183	0.0420673	0.00787132	0.433696	0.35655	0.410995	0.477887	0.447346	0.54676	0.477654	0.0779512	0.67499	0.89954	0.0369479
BMI-rs3737992	G	A	0.00125483	0.00128279	-0.0167858	-0.00161621	0.00647421	-0.0113632	-0.0077552	-0.0623615	0.475307	0.00980756	0.0710814	-0.000251279	0.0549879	0.0197035	0.00216297	0.0344756	0.0345362	0.0114871	0.0797702	0.214539	0.0512995	0.050058	0.0093269	0.981388	0.394257	0.454933	0.85104	0.742138	0.499597	0.434354	0.0267277	0.848383	0.155615	0.978507
BMI-rs3738476	A	C	0.0078589	-0.177191	-0.0100647	-0.00101598	0.00592206	0.0384449	0.0216804	0.0658002	-0.0768799	-0.0220814	-0.0266874	0.00570438	0.0755115	0.0218232	0.00248125	0.0396718	0.0396959	0.0132733	0.0904122	0.242699	0.0587505	0.0572263	0.0106771	0.0189492	0.644659	0.682202	0.881336	0.332803	0.102389	0.466749	0.751418	0.707029	0.640967	0.593161
BMI-rs3810291	A	G	0.0119997	-0.0112011	-0.00542482	-0.00420668	-0.00737665	-0.011174	-0.0208977	0.140979	0.269117	0.0164516	0.0640769	0.00412459	0.0297995	0.0182716	0.00172814	0.0275543	0.0276062	0.00923425	0.0640678	0.171719	0.0411084	0.0400867	0.00742507	0.707004	0.766543	0.0149241	0.78892	0.685652	0.0236328	0.0277742	0.117069	0.689009	0.109943	0.578557
BMI-rs3840590	G	GA	0.0076458	0.0164717	0.0233791	-0.00224796	-0.006607	0.0286639	0.00318863	-0.0961253	-0.18287	0.00972823	-0.0107633	0.00174263	0.0282795	0.0188099	0.00172929	0.0275782	0.0276066	0.00921121	0.063722	0.168483	0.0411051	0.0398863	0.00742599	0.560256	0.213899	0.193625	0.810661	0.299133	0.729217	0.131425	0.277749	0.812915	0.787276	0.814468
BMI-rs40067	G	A	0.00197428	0.0330527	-0.00486542	-0.00206075	-0.0556496	-0.0130574	-0.0107527	0.0207742	0.292245	0.00808515	0.00552887	0.0161222	0.0548971	0.0197751	0.00216333	0.0345558	0.0346351	0.0115708	0.079859	0.212904	0.0518338	0.0501248	0.0094311	0.547118	0.805654	0.340802	0.107306	0.706175	0.352738	0.79476	0.169859	0.876047	0.91217	0.0873663
BMI-rs4027773	T	G	0.011235	0.0730823	-0.0960424	-0.000168903	0.0249776	0.0210414	-0.00978076	0.0844627	0.223088	0.0258062	0.0888849	0.00560928	0.0272005	0.0186002	0.00169672	0.0270176	0.0270574	0.0090109	0.0621618	0.1631	0.0402368	0.0390762	0.00735149	0.00721447	2.42559e-07	0.920705	0.35523	0.436771	0.277729	0.174225	0.171375	0.52129	0.0229278	0.445457
BMI-rs4072917	G	A	0.0252865	-0.108879	0.0993192	0.0011848	-0.00831072	-0.00963773	0.00639696	-0.0448863	0.0549253	-0.0103579	-0.0314021	0.0030081	0.0219233	0.0204795	0.00163152	0.0260111	0.0260405	0.00866141	0.0598854	0.160229	0.0387285	0.0376192	0.00697727	6.82597e-07	1.2373e-06	0.467721	0.749342	0.711305	0.460176	0.453534	0.731755	0.789124	0.403868	0.666376
BMI-rs4082793	C	T	0.0180734	-0.011061	0.00595449	0.000118542	-0.000446014	0.0283497	-0.0117801	0.0680314	0.151643	0.0174298	0.0441642	-0.0105933	0.0236838	0.0194612	0.00163918	0.0261819	0.0262184	0.00873605	0.0605785	0.161458	0.039026	0.037951	0.00710358	0.640482	0.75963	0.942349	0.986409	0.279569	0.177515	0.261426	0.347627	0.65515	0.244541	0.135897
BMI-rs41310284	C	A	0.0700508	0.236875	-0.128079	-0.00340735	0.00808398	-0.0582219	-0.0186193	0.200403	0.304694	0.0793596	0.137768	0.0238025	0.0901606	0.023261	0.0026976	0.0430374	0.0431006	0.0143131	0.10027	0.26078	0.063705	0.0619134	0.0116588	0.00860815	3.6711e-08	0.206553	0.851005	0.176749	0.193306	0.0456494	0.242649	0.212863	0.0260706	0.0411939
BMI-rs4148155	A	G	0.00109648	-0.0207988	0.00712729	-0.00149742	-0.0195454	0.0158063	-0.00693727	0.0383135	-0.208814	0.105656	-0.0724209	-0.00661073	0.0786901	0.0221751	0.00253141	0.0404286	0.0404981	0.0135221	0.0938469	0.247449	0.0598453	0.0586538	0.010943	0.791539	0.7479	0.554162	0.628773	0.696317	0.60793	0.683086	0.398745	0.0774842	0.216937	0.545775
BMI-rs4238585	T	C	0.000696917	0.0749443	-0.00633269	0.0010544	0.0800122	-0.0264895	0.00409093	-0.120882	-0.414081	0.0192952	-0.0183085	0.00523235	0.0736739	0.0216254	0.0024495	0.0392396	0.0392928	0.0130553	0.0924103	0.250719	0.0584426	0.0569562	0.0106417	0.309038	0.769648	0.666863	0.0414442	0.500212	0.754013	0.190842	0.0986222	0.741283	0.74787	0.622945
BMI-rs424539	C	G	0.0403641	-0.00786703	0.00135754	0.00112145	-0.00917179	-0.0111291	-0.00303289	-0.1126	-0.437632	-0.0408506	-0.0812692	-0.0193488	0.0259553	0.0187205	0.00166491	0.0266013	0.0266346	0.00886215	0.0606963	0.160301	0.0396682	0.0385685	0.00718144	0.761815	0.942191	0.500576	0.730255	0.676063	0.732178	0.0635784	0.00633256	0.303103	0.0351072	0.00705508
BMI-rs4467770	A	G	0.0166829	0.0720187	0.0211456	-0.00181422	-0.0294799	0.0414536	-0.0200664	0.12561	0.0761107	0.0236539	0.0794011	-0.0109852	0.03538	0.0183651	0.00183396	0.0292854	0.0293235	0.00977305	0.0683792	0.18233	0.0436068	0.0425057	0.00791758	0.0417938	0.249568	0.322549	0.314107	0.157461	0.0400505	0.0662174	0.676361	0.587519	0.0617627	0.165307
BMI-rs4477562	C	T	0.0648836	-0.0347013	0.00490881	0.00237124	0.027699	-0.0281096	0.0142357	-0.089124	-0.720948	-0.102812	-0.131271	-0.0113583	0.0739789	0.0216372	0.00245367	0.039244	0.0392983	0.0130449	0.0899199	0.234138	0.0579632	0.0566057	0.0105787	0.63902	0.820526	0.333843	0.480303	0.474431	0.27515	0.321614	0.00207609	0.0761063	0.0203945	0.28296
BMI-rs4482463	A	C	0.0519511	-0.097241	0.0196678	0.000380635	0.00237541	0.0124485	-0.00830353	-0.143525	0.121897	-0.0404068	-0.0671246	-0.0113925	0.12061	0.0259611	0.00307568	0.0489983	0.0490933	0.0163424	0.111589	0.28927	0.0728059	0.0707335	0.0131394	0.420105	0.448698	0.901508	0.961334	0.799829	0.611387	0.198377	0.673467	0.578899	0.342633	0.385916
BMI-rs45474996	G	A	0.00370971	-0.084555	0.0110914	-0.00267838	-0.0348353	0.0311425	-0.0282847	0.157498	0.0593776	0.0110945	0.143288	-0.00789749	0.0810149	0.0222373	0.0025504	0.04075	0.0408112	0.0136072	0.0948193	0.253505	0.0609671	0.0591921	0.0111073	0.296627	0.617939	0.293635	0.392633	0.445413	0.0376497	0.0967085	0.81481	0.855602	0.0154908	0.477074
BMI-rs45556631	CT	C	0.0178228	-0.036694	-0.016132	0.0015203	0.0693924	-0.00843106	0.00717042	-0.0637836	0.227962	0.0899332	0.0703826	-0.00579608	0.0232943	0.0195466	0.001633	0.0260604	0.0260886	0.00869115	0.0602245	0.161729	0.0387954	0.0376537	0.00703297	0.115203	0.409194	0.351863	0.00775089	0.746566	0.409358	0.289556	0.158681	0.020443	0.0615955	0.409867
BMI-rs4648450	C	A	0.00384722	-0.00160504	-0.00125196	0.00159126	-0.0216107	-0.0440523	-0.0106273	0.0424807	0.0626942	0.0256699	0.00317003	0.000574696	0.0224189	0.020444	0.00164345	0.0262401	0.0262555	0.00874965	0.0599297	0.159011	0.0388773	0.0378681	0.00711533	0.942926	0.951169	0.332925	0.410182	0.0933814	0.22452	0.478423	0.693378	0.509074	0.933285	0.935626
BMI-rs4648727	C	A	0.00380587	0.00506702	-0.00697899	0.000404574	-0.0344358	0.04629	-0.0171541	0.0481672	-0.160803	-0.000120298	0.0228365	0.0103381	0.0229583	0.0196889	0.00162836	0.0259997	0.0260439	0.00868113	0.0595261	0.157358	0.0386104	0.0376229	0.00695797	0.825322	0.722992	0.803783	0.18535	0.0755063	0.0481537	0.418413	0.306833	0.997514	0.543862	0.137338
BMI-rs4657793	T	A	0.0027491	0.0592126	-0.00340862	0.000202329	-0.0164659	0.0165841	-0.00922601	-0.0628693	0.0684096	0.0260201	0.0419775	-0.00454879	0.0262735	0.0186029	0.00166815	0.0266454	0.0266694	0.00889468	0.0614228	0.162937	0.0397279	0.0385372	0.00719899	0.0242156	0.854617	0.903462	0.536599	0.534046	0.299621	0.306049	0.674593	0.512496	0.276036	0.527476
BMI-rs4674373	C	G	0.0135106	-0.00579455	-0.00483854	0.000232926	-0.036715	-0.00136408	-0.0179123	0.169582	0.569707	0.01115	-0.0188763	0.00807206	0.0547324	0.0197283	0.00215546	0.0344754	0.0345074	0.0115128	0.0799763	0.210335	0.0512696	0.0499899	0.00927175	0.915685	0.806256	0.913945	0.286894	0.968468	0.119741	0.0339725	0.00675791	0.827836	0.705727	0.38397
BMI-rs4722398	C	T	0.0130983	-0.0138183	-0.0141645	0.00245507	0.0402064	-0.0034757	0.00536133	0.0530201	0.0331378	0.0721243	0.0947044	-0.0205892	0.0667136	0.0209323	0.00235622	0.037537	0.0375859	0.0125425	0.0848863	0.22112	0.0555827	0.0542423	0.0102004	0.835909	0.498607	0.297433	0.284119	0.926322	0.66905	0.532234	0.880872	0.194426	0.0808215	0.0435438
BMI-rs4729085	G	C	0.441315	-0.0477129	0.011727	0.00374822	-0.0178524	-0.0627621	0.0445774	-0.151555	-0.689571	-0.105433	-0.187838	-0.0241439	0.0718991	0.0214579	0.0024272	0.0388263	0.0388582	0.0129107	0.0885793	0.239435	0.057822	0.0560612	0.0105154	0.506941	0.584713	0.122526	0.645658	0.106278	0.000554991	0.0870911	0.00397712	0.0682442	0.000806595	0.0216746
BMI-rs4759228	G	C	0.0135008	0.0378372	0.00226638	0.00144585	-0.032053	0.00418074	0.00543344	0.0263986	0.13161	0.0153575	0.0238302	-0.0180236	0.0323053	0.0183078	0.00177917	0.028389	0.0284463	0.00947119	0.065325	0.169396	0.0422317	0.0411826	0.00770538	0.241504	0.901479	0.416417	0.258872	0.883156	0.566184	0.686132	0.437197	0.716121	0.562828	0.0193322
BMI-rs4790841	C	T	0.0370679	0.019533	-0.00191889	-0.00223244	-0.0480441	-0.0786648	-0.0261965	-0.00892798	-0.149636	-0.129072	-0.0171826	-0.00664931	0.0603888	0.0202534	0.0022523	0.0359103	0.0359476	0.0119661	0.0830964	0.216517	0.053506	0.051887	0.00974207	0.746352	0.924518	0.321599	0.180933	0.0286475	0.028581	0.914439	0.4895	0.0158541	0.740528	0.494901
BMI-rs4802570	G	C	0.0146802	-0.0296665	-0.00887023	0.00113131	0.0173072	0.00519019	0.0105078	0.0738461	0.167361	0.0427582	-0.0164522	-0.00792926	0.0248882	0.0189949	0.00165825	0.0263975	0.0264306	0.00880217	0.0606814	0.16085	0.0392243	0.0380719	0.00712251	0.233267	0.640514	0.495094	0.512057	0.844321	0.232567	0.223625	0.298118	0.275674	0.665644	0.265595
BMI-rs4806814	G	A	0.995828	0.0015722	-0.0161199	0.00168639	-0.0476166	-0.0422282	-0.0370193	-0.148167	-0.0879579	0.0680402	0.0311238	-0.00689635	0.0609875	0.0204398	0.00227795	0.0362408	0.03629	0.012072	0.0847492	0.217296	0.0541746	0.052701	0.00976585	0.979434	0.430316	0.459114	0.188883	0.244574	0.00216574	0.0804131	0.685636	0.209139	0.554807	0.480084
BMI-rs4856720	C	G	0.0113951	0.0018754	-0.0243262	-0.00224701	-0.0379646	-0.0403511	-0.00644897	0.0626478	0.149503	-0.0677042	0.0173665	-0.00934341	0.0222106	0.0201483	0.00162062	0.0258981	0.0259299	0.00865288	0.0596577	0.159036	0.0384594	0.0374387	0.0069992	0.932709	0.227296	0.16559	0.142671	0.119672	0.456092	0.293663	0.347188	0.0783404	0.642744	0.181903
BMI-rs488029	A	G	0.0525016	0.0158276	0.0154228	-0.00190004	-0.0093647	-0.00697816	-0.0158952	0.0584061	-0.199263	0.0209815	0.0551989	-0.00927715	0.0218036	0.0204184	0.00161946	0.025886	0.0259144	0.00862013	0.0594419	0.157454	0.0385074	0.037492	0.00701625	0.467891	0.450047	0.240694	0.717527	0.787717	0.0651889	0.325818	0.205683	0.585844	0.140946	0.186091
BMI-rs4889867	C	T	0.0155167	0.00886925	0.00140987	-0.00065035	-0.0167313	-0.010934	-0.0131846	-0.0789282	-0.0687049	0.0271872	0.0578054	-0.0148964	0.0228939	0.0197498	0.00162606	0.025982	0.0260117	0.00867554	0.0598438	0.159374	0.0386896	0.0376017	0.00702119	0.698455	0.94309	0.689191	0.519604	0.67423	0.128576	0.187202	0.666402	0.482244	0.124219	0.0338703
BMI-rs4911382	T	C	0.000512545	0.043684	0.00588954	0.0010644	-0.0546701	-0.0635055	0.00145147	-0.0423165	0.123078	-0.0384001	0.00028437	-0.00183242	0.0241367	0.0192372	0.00164443	0.0262492	0.0262787	0.00876201	0.0603108	0.16129	0.0389972	0.0379422	0.00708723	0.0703192	0.759487	0.517454	0.0372762	0.0156663	0.868429	0.482904	0.445412	0.324779	0.99402	0.79598
BMI-rs4929923	C	T	0.00282273	-0.0204999	-0.0145222	-0.00173487	-0.0437842	-0.0209588	-0.0255443	0.0191682	0.196276	-0.0444778	-0.0276944	-0.00717782	0.0274586	0.0184249	0.00168618	0.0269273	0.0269583	0.0089874	0.0621014	0.163228	0.0400181	0.0390232	0.00721964	0.455321	0.430589	0.303538	0.103947	0.436893	0.00448027	0.757581	0.229184	0.26638	0.477897	0.320124
BMI-rs4936175	T	C	0.00185961	0.0306861	0.00285115	-0.000908051	0.0366479	0.0126822	0.0174579	-0.0601243	-0.231846	-0.00435666	-0.0404861	0.00483865	0.0228726	0.0196474	0.00162397	0.0259308	0.0259691	0.00865447	0.0594114	0.155741	0.0385753	0.0374815	0.00699164	0.179724	0.88462	0.576056	0.15757	0.625299	0.0436751	0.31154	0.136578	0.910079	0.280072	0.488899
BMI-rs497418	C	A	0.0034898	0.00850205	-0.0111859	-0.0015724	0.0258784	0.0209109	0.0258421	-0.0109237	-0.242819	-0.0532222	-0.0156196	0.0121329	0.025929	0.0188791	0.00167381	0.0267399	0.0267762	0.00892616	0.0611152	0.162044	0.0397638	0.0386062	0.00723547	0.74299	0.553517	0.347519	0.333154	0.434832	0.00379078	0.858143	0.134009	0.18075	0.685782	0.0935719
BMI-rs4981693	A	G	0.0329572	-0.0403507	0.024746	-0.00250839	0.0079506	0.00588733	0.00712524	0.00420138	-0.166766	0.00442706	-0.00309551	0.0001784	0.0413165	0.0186265	0.00193706	0.0308755	0.0309367	0.01029	0.0711281	0.189402	0.045941	0.0447493	0.00830632	0.328755	0.184001	0.19534	0.796789	0.849072	0.488661	0.952898	0.378596	0.923232	0.944851	0.982865
BMI-rs500764	G	T	0.0435064	0.000590443	0.00739419	0.0011533	0.0498173	0.0409422	0.0192647	-0.0311347	0.0399347	0.00655389	-0.00160013	0.00520807	0.0230807	0.0195541	0.0016237	0.0259622	0.0259894	0.0086859	0.0594923	0.157148	0.0386231	0.0375475	0.00699661	0.979591	0.705326	0.477526	0.055006	0.115179	0.0265608	0.600738	0.799402	0.865256	0.966008	0.456654
BMI-rs522110	G	A	0.00602921	0.0981929	-0.112431	-0.00164642	-0.0581626	0.0440832	-0.0185852	-0.0787897	-0.152085	-0.0464808	-0.0500518	0.0131454	0.022935	0.0197066	0.00163019	0.0260089	0.0260444	0.0086674	0.0596389	0.158621	0.0387722	0.0376799	0.00703512	1.85831e-05	1.163e-08	0.312517	0.0253357	0.0905304	0.0320124	0.186465	0.337663	0.230601	0.184067	0.0616893
BMI-rs523288	A	T	0.0218442	0.042718	-0.0666597	0.00687798	0.0961364	-0.0172279	0.0466834	-0.0885833	0.273609	0.0371833	-0.0226359	0.00213054	0.0400184	0.0186629	0.00190374	0.0304131	0.0304444	0.0101444	0.06876	0.184091	0.0449228	0.0437694	0.00816732	0.285767	0.000354624	0.000302874	0.00157236	0.571474	4.18883e-06	0.197644	0.137208	0.407833	0.605044	0.7942
BMI-rs530265334	TA	T	0.0453443	0.0251919	0.0198357	0.0023717	-0.0205359	0.034784	0.00609501	-0.0525561	0.235009	-0.0487945	-0.0279554	0.00328637	0.0322726	0.0185885	0.00179731	0.0287014	0.0287285	0.00956114	0.0653265	0.174839	0.0425817	0.0413409	0.00779574	0.435039	0.285932	0.186975	0.474301	0.225979	0.523815	0.421101	0.178904	0.251836	0.498905	0.673347
BMI-rs530971857	CT	C	0.0446607	0.00979446	0.00514301	-9.57423e-06	-0.0599719	-0.0340566	-0.0067107	0.0206225	-0.0397677	-0.0303197	-0.10998	0.000222581	0.0281898	0.0194563	0.00176424	0.0281487	0.0281898	0.00939016	0.06466	0.173782	0.0417991	0.040674	0.00766234	0.728256	0.791521	0.99567	0.0331284	0.227004	0.474824	0.749775	0.818996	0.468227	0.00685315	0.976826
BMI-rs539515	A	C	0.0457593	-0.0515618	0.00675525	0.00698288	0.112541	-0.00886304	0.0557594	-0.218536	-0.370109	-0.0381533	-0.061999	-0.0120428	0.0450518	0.0189267	0.00199283	0.0318085	0.0318338	0.0105957	0.0716392	0.19173	0.0471435	0.0457949	0.00858205	0.252417	0.721155	0.000458397	0.000403125	0.780694	1.42249e-07	0.00228476	0.0535621	0.418343	0.175789	0.160544
BMI-rs543124501	A	AT	0.00289472	-0.015986	0.0111351	0.00243067	-0.00300668	0.0542767	-0.0181694	0.239591	0.339749	0.103005	0.00187884	0.000728933	0.0307489	0.0186328	0.00176958	0.0282535	0.02829	0.00940725	0.0647766	0.171545	0.0419694	0.0410047	0.00757628	0.603143	0.550103	0.169571	0.915251	0.0550387	0.0534319	0.000216735	0.0476466	0.0141172	0.963454	0.923352
BMI-rs55654354	T	C	0.00256116	0.0201474	0.00737357	0.000703304	-0.127984	-0.0196361	-0.0187076	-0.0443891	-0.213062	-0.0288379	-0.0334471	-0.000420063	0.0553036	0.0197672	0.00216828	0.0346041	0.034668	0.0115245	0.0794054	0.211877	0.0513551	0.0501256	0.00923491	0.715631	0.709134	0.745665	0.000216899	0.571119	0.104527	0.57615	0.314614	0.57443	0.504603	0.96372
BMI-rs55689442	C	T	0.0105515	0.00872308	0.00268461	3.85609e-05	0.0212201	0.0380931	-0.0168756	0.0654319	-0.0594152	0.0140689	0.0657263	-0.0126361	0.0212841	0.0208992	0.0016214	0.0258911	0.0259381	0.0086394	0.0596745	0.159266	0.0385679	0.0375006	0.00698138	0.681924	0.897789	0.981026	0.412449	0.141938	0.0507817	0.27287	0.709107	0.715275	0.0796604	0.0703021
BMI-rs55714539	A	C	0.00505605	0.0300376	0.0108652	-0.000767239	-0.00407525	-0.019299	-0.00299735	-0.000534028	0.219695	-0.0502733	-0.104116	0.0102591	0.0287731	0.0186199	0.00172896	0.0275707	0.0276119	0.00922879	0.0629237	0.172605	0.0409642	0.0399002	0.00740652	0.29651	0.559541	0.657218	0.882492	0.484591	0.745346	0.993229	0.203085	0.219731	0.00907056	0.166011
BMI-rs55814654	A	G	0.0020591	0.0245727	-0.00643248	-0.000461645	0.050911	0.0419288	0.0237961	-0.0577938	0.0806848	-0.0229837	-0.0419465	0.00202131	0.0266124	0.0185761	0.00167641	0.0267302	0.0267659	0.00892526	0.0610753	0.160642	0.0396535	0.0386673	0.00716414	0.355824	0.729135	0.783027	0.05683	0.117233	0.00767299	0.344011	0.615481	0.562177	0.278009	0.777835
BMI-rs55911231	C	T	0.00572881	-0.00767999	-0.00341028	0.00264538	-0.0074394	0.0371884	0.0249209	-0.0448167	0.379152	0.0317056	-0.0622698	-0.0110359	0.0243162	0.0191172	0.00164101	0.0262235	0.0262594	0.00873636	0.0599154	0.159928	0.0389434	0.037876	0.00703889	0.752126	0.858418	0.106954	0.776646	0.156721	0.00433742	0.454461	0.0177523	0.415562	0.100169	0.11692
BMI-rs564832	T	C	0.00465431	0.0115938	0.0151413	6.78915e-05	-0.00310202	-0.01972	-0.00958946	0.06317	0.333438	0.0907729	0.0612597	-0.00434492	0.0306111	0.018292	0.00175015	0.0278845	0.0279192	0.00928923	0.0638084	0.168257	0.0414912	0.040267	0.00751496	0.704877	0.407811	0.969056	0.911422	0.479987	0.301923	0.322178	0.0475118	0.0286882	0.128177	0.563151
BMI-rs57307148	C	A	0.00834218	-0.0813774	-0.00331289	0.00111511	-0.00863282	-0.0217891	0.00704571	-0.0206834	-0.669256	-0.00598824	-0.029123	-0.0120994	0.0436667	0.0188104	0.00197364	0.0315458	0.0315807	0.0105274	0.0715871	0.192585	0.0467155	0.0454973	0.00857044	0.0623787	0.8602	0.572073	0.784346	0.490226	0.50332	0.772638	0.000510705	0.898002	0.522106	0.158024
BMI-rs575818189	G	GT	0.00271957	0.0182195	-0.013163	0.000445733	-0.0310289	0.0296592	-0.0115511	-0.0227428	-0.364552	0.0018552	0.0306893	0.0224118	0.0264752	0.0187137	0.00168278	0.0268234	0.0268571	0.00893584	0.0617763	0.160921	0.0398535	0.0388263	0.00723678	0.491344	0.481815	0.791103	0.247362	0.26945	0.196125	0.712764	0.0234885	0.962872	0.429281	0.00195578
BMI-rs575840515	A	G	0.00129851	0.0198232	0.00842376	0.00126277	0.0267993	0.0323278	0.0101394	0.0438976	-0.222113	0.021367	0.0162846	0.0100125	0.0340667	0.0185697	0.00182675	0.0291583	0.0291883	0.0097031	0.0668073	0.178332	0.0434026	0.0420676	0.0078705	0.560639	0.650096	0.489399	0.358046	0.268053	0.296039	0.511132	0.212948	0.62251	0.698679	0.20332
BMI-rs5788199	TA	T	0.00463794	-0.137384	0.0829438	0.00235009	0.0620188	0.0469166	0.0164166	-0.0680636	0.0685121	0.00245897	0.0306475	0.00979216	0.0385899	0.0185167	0.00189469	0.0302303	0.0302552	0.0100842	0.069299	0.182032	0.0450767	0.0437357	0.00801855	0.000370774	7.48836e-06	0.214844	0.0402151	0.120976	0.103537	0.326015	0.706639	0.956496	0.483464	0.222017
BMI-rs58243949	C	T	0.013258	0.00040874	0.00434194	0.00112458	-0.0117717	0.0213506	0.0145663	-0.0385615	0.110249	-0.0641714	-0.0443646	-0.00542085	0.0401415	0.0185103	0.00191195	0.0305227	0.0305758	0.0102002	0.0697999	0.191457	0.0455095	0.0442378	0.00820729	0.991876	0.814544	0.556406	0.699742	0.484999	0.153282	0.580635	0.564721	0.158522	0.315927	0.508939
BMI-rs5850333	AC	A	0.012561	-0.0108746	0.00532365	0.00203544	0.0121233	-0.038634	-0.00548901	-0.0417003	0.0398523	0.0397475	0.0102521	0.00527425	0.0325237	0.0181737	0.00177619	0.0283342	0.0283649	0.00943461	0.0645895	0.171152	0.0420981	0.0409389	0.00765874	0.738109	0.769575	0.251815	0.668748	0.173188	0.560705	0.518526	0.81588	0.345088	0.80226	0.49104
BMI-rs59893724	A	G	0.00176683	-0.0126415	-0.00547189	-0.000688237	-0.0476485	0.00900894	-0.0086877	0.00904719	0.263369	-0.0210523	-0.00586639	0.00178913	0.0384195	0.0183984	0.00188087	0.0300297	0.030065	0.0100154	0.069553	0.181584	0.0447894	0.0434739	0.00807271	0.742127	0.766152	0.714429	0.112579	0.764445	0.385706	0.896506	0.14695	0.638336	0.892659	0.824605
BMI-rs6030803	T	C	0.0010032	-0.00209877	0.0215317	-0.0010148	-0.0180284	0.087667	-0.0228874	0.0116796	-0.0487661	-0.0800254	-0.0446996	0.00873322	0.0735915	0.0216378	0.00246333	0.0392627	0.0393144	0.0131043	0.0902946	0.229409	0.0583863	0.0567846	0.0106853	0.977248	0.31969	0.680368	0.64611	0.0257553	0.080716	0.897081	0.83166	0.170496	0.431178	0.413751
BMI-rs60474271	C	CT	0.0355791	-0.01095	-0.00159725	0.00111649	0.0572274	0.0118172	0.0121761	-0.0673702	-0.0243671	0.0331205	0.00337479	-0.00512083	0.0229724	0.0200576	0.0016453	0.026255	0.0262899	0.00875838	0.0603376	0.160253	0.0390441	0.0379593	0.00710066	0.633607	0.936529	0.497399	0.0292824	0.653073	0.164462	0.264186	0.879144	0.396281	0.929157	0.470802
BMI-rs60619538	GA	G	0.00215222	0.00856053	0.00279844	-0.00567477	-0.0420763	-0.0102434	-0.00524377	0.0434675	0.0313715	-0.0665865	-0.106054	-0.00132496	0.0570034	0.0199425	0.00219932	0.0350768	0.0351291	0.0116532	0.0803218	0.217673	0.0523758	0.0507394	0.00949085	0.880626	0.888403	0.00987364	0.230316	0.770597	0.652721	0.588393	0.885404	0.203616	0.0366049	0.888973
BMI-rs6069422	G	A	0.00283869	0.0170526	-0.00231093	-0.00138979	-0.0165828	0.00357439	-0.00341866	-0.00746402	0.0521122	0.00152118	0.0201295	-0.0115763	0.0232568	0.0196487	0.00163681	0.0261401	0.0261771	0.00870959	0.0601133	0.159203	0.0388685	0.037783	0.00703794	0.46342	0.906375	0.395835	0.525832	0.891389	0.694676	0.901184	0.743418	0.968782	0.594196	0.100005
BMI-rs60764613	G	T	0.00429038	0.0262059	0.012919	0.00202693	0.0367168	-0.0641324	0.00986206	-0.228931	-0.221207	-0.0213119	-0.0635535	0.0121596	0.0642959	0.0207305	0.00232184	0.0370096	0.0370413	0.0123775	0.0841117	0.23182	0.0547746	0.0532659	0.01002	0.68358	0.533163	0.382672	0.321155	0.0833865	0.425582	0.00649429	0.339975	0.697215	0.232818	0.224929
BMI-rs61813324	C	T	0.0363098	-0.00721934	-0.00918693	-0.00140161	0.0265442	0.0624317	0.0335847	0.00168666	0.256118	0.0495381	-0.0557197	0.0116197	0.0711716	0.0214581	0.00242323	0.0387305	0.038791	0.0129815	0.088596	0.239613	0.0576868	0.0560651	0.0102866	0.919205	0.668554	0.562991	0.49312	0.107522	0.00967856	0.984811	0.285125	0.390484	0.320302	0.258648
BMI-rs618777	T	C	1	0.0124145	-0.000468362	0.00151457	0.0308861	0.0232304	0.0144015	-0.0708441	-0.0328008	0.00343984	-0.0349065	-0.00214876	0.0230645	0.019864	0.00163906	0.0261892	0.0262268	0.00873027	0.059967	0.161937	0.0389203	0.0379414	0.00706007	0.590404	0.981189	0.355462	0.238261	0.375753	0.0990245	0.237451	0.839485	0.929573	0.357568	0.760859
BMI-rs61986334	G	C	0.235244	0.0199478	0.0274694	-0.000705607	0.030178	0.0165384	0.00704329	0.027421	0.208325	0.0142006	0.0359825	0.00532989	0.0212937	0.0209557	0.0016232	0.0258978	0.025945	0.00863427	0.0595351	0.158591	0.0385938	0.0375271	0.00700625	0.348865	0.189917	0.663779	0.24391	0.523838	0.414652	0.645096	0.188984	0.712912	0.337641	0.446818
BMI-rs62053191	G	A	0.00188226	0.0512368	-0.00975572	-0.00258232	-0.0809629	-0.00844723	-0.00550292	-0.219731	-0.978404	-0.0899377	-0.13301	-0.0255475	0.110022	0.0248302	0.00292307	0.0466542	0.0467033	0.015562	0.107876	0.282994	0.0689857	0.067697	0.012523	0.641435	0.694396	0.377005	0.0826744	0.85647	0.72363	0.0416633	0.000545653	0.192333	0.049441	0.0413478
BMI-rs62104476	G	A	0.00523211	-0.0334216	0.0115886	0.00243879	0.0252539	0.00610767	0.0177987	-0.0747626	-0.306699	-0.0244489	-0.0596368	-0.0195602	0.0290901	0.018299	0.00171739	0.0273726	0.0274037	0.00912068	0.0629304	0.166779	0.0407105	0.0395683	0.00734502	0.250599	0.526544	0.155594	0.356219	0.823631	0.0510033	0.234826	0.0659227	0.548137	0.131765	0.00774442
BMI-rs62147189	G	T	0.625051	-0.037334	-0.00833007	-0.00177368	-0.00519741	-0.0043885	0.000600605	0.0175378	0.0288432	-0.0342648	-0.0356242	-0.0105287	0.0268108	0.0190788	0.00170957	0.0272673	0.0273048	0.00908135	0.0620864	0.16735	0.0403898	0.0392654	0.00731478	0.163773	0.662392	0.299502	0.848831	0.872312	0.94727	0.77758	0.86316	0.396243	0.364267	0.150049
BMI-rs62242072	G	A	0.0613472	-0.0173195	-0.00940644	-0.00311881	-0.0499698	-0.0294231	-0.0169142	-0.0463387	-0.161888	0.0306677	-0.00997263	-0.00352897	0.0246664	0.0192285	0.00165975	0.0264722	0.0265147	0.00882664	0.0612486	0.161457	0.0393475	0.0382457	0.00714814	0.482588	0.624707	0.0602347	0.0590764	0.267135	0.0553325	0.44931	0.316023	0.435741	0.794284	0.621525
BMI-rs62243489	T	G	0.00956709	0.0399997	-0.0159443	0.00135279	-0.0682969	-0.0189276	-0.00447153	0.0786364	0.130574	-0.0268909	-0.0393814	-0.00893675	0.0368889	0.0183849	0.00185681	0.0296777	0.0297272	0.00988214	0.0678469	0.181049	0.0440632	0.042918	0.00799945	0.27822	0.385805	0.466275	0.021376	0.524313	0.650919	0.246447	0.470782	0.541677	0.358832	0.263923
BMI-rs62477685	A	T	0.00470342	0.00220741	-0.0030467	0.00100712	-0.0525926	-0.00384408	-0.0222293	0.172421	0.310423	-0.0279876	0.071798	0.00229054	0.0238811	0.0192398	0.00163455	0.0261016	0.026146	0.00870187	0.0601008	0.157386	0.0389077	0.0377764	0.00702497	0.926354	0.874178	0.537799	0.0439145	0.883114	0.0106333	0.00411979	0.0485691	0.471937	0.0573554	0.744381
BMI-rs6265	C	T	0.155755	-0.140563	0.0484726	-0.000542622	0.0580437	-0.0211562	-0.0297377	0.0825814	0.349601	0.0871684	0.0321229	-0.00481086	0.0489181	0.0192798	0.0020619	0.0328643	0.0329651	0.0110009	0.0763258	0.202559	0.0490648	0.0476248	0.0089483	0.00406083	0.0119323	0.792423	0.07737	0.521019	0.00686778	0.279272	0.0843633	0.0756364	0.499995	0.590835
BMI-rs6445198	G	T	0.297052	0.00796928	0.00808662	-0.000624935	-0.00389607	0.00648874	-0.0267323	0.0421884	0.0805469	0.0556397	0.0753644	0.00608339	0.0241645	0.0192793	0.00164573	0.0262594	0.026299	0.008761	0.0603567	0.162234	0.0391136	0.0381187	0.0071382	0.741556	0.674891	0.704146	0.882052	0.805118	0.00227894	0.484562	0.619553	0.154878	0.0480323	0.394088
BMI-rs6449676	G	A	0.00104353	-0.0160157	0.0024985	0.00272325	0.0503215	0.0426554	0.0204095	0.0864031	0.170406	0.0603263	0.00110089	0.0106429	0.0216846	0.0203971	0.0016155	0.025791	0.0258186	0.00860006	0.0590199	0.157782	0.0382274	0.0372439	0.00695937	0.460166	0.902509	0.0918537	0.0510433	0.0985113	0.0176361	0.143205	0.280142	0.114547	0.976419	0.126196
BMI-rs653264	A	G	0.00314107	-0.0155638	0.0115653	0.00106494	0.00175992	-0.0254828	0.00540619	-0.0835365	-0.0861759	-0.0140186	-0.0172555	-0.0123907	0.0225752	0.0198042	0.0016203	0.0258785	0.0259208	0.00863715	0.0594246	0.161536	0.0384276	0.0375128	0.00700437	0.490561	0.559233	0.511023	0.94578	0.325557	0.531366	0.159798	0.593704	0.715258	0.645524	0.0768961
BMI-rs6536575	C	T	0.00213998	-0.0080967	-0.00885952	-0.00279836	-0.00278611	0.0499998	0.000910243	0.117344	0.16528	0.0255073	0.0050416	0.00422449	0.0216492	0.0205522	0.00161962	0.0258654	0.0258921	0.00863153	0.0591456	0.159421	0.0383985	0.0373603	0.00697677	0.708408	0.666415	0.0840261	0.914221	0.0534741	0.916014	0.0472589	0.299852	0.506513	0.892655	0.544842
BMI-rs653958	A	G	0.0168329	0.0237793	0.0279277	0.00109912	0.0246171	0.0207352	0.0166308	-0.00940171	-0.121935	-0.0115933	-0.0538626	-0.0069878	0.0264547	0.0186234	0.00167329	0.026717	0.0267509	0.00892067	0.0614149	0.16382	0.039792	0.0386624	0.00725439	0.368723	0.133718	0.511269	0.35684	0.438268	0.0622805	0.878331	0.456682	0.770786	0.163576	0.335423
BMI-rs6545559	C	T	0.0147996	0.0138761	0.00739333	-0.000267761	0.00400332	-0.0490764	0.00910758	-0.20441	-0.154802	-0.0621473	-0.0478871	0.00166953	0.0303888	0.0182692	0.00174295	0.0277919	0.0278277	0.0092321	0.0634064	0.168215	0.0412678	0.0401161	0.00748666	0.647944	0.685707	0.877905	0.885464	0.0778034	0.323883	0.00126513	0.357435	0.132082	0.232592	0.823535
BMI-rs6597975	G	C	0.999997	0.0125568	0.00855516	-0.00014103	0.0187078	0.00807128	-0.0273617	-0.00301109	-0.20337	0.00422607	-0.0155883	0.00658648	0.02276	0.0200991	0.00163786	0.0261704	0.0262128	0.00872712	0.060196	0.162897	0.0390889	0.0378983	0.00706602	0.581151	0.670364	0.931382	0.474705	0.758148	0.00171728	0.960105	0.211865	0.913905	0.68084	0.351269
BMI-rs66679256	C	T	0.00109464	0.000457221	-0.00121879	-0.000618842	0.00219834	0.02296	0.00405806	-0.017225	-0.0828957	-0.0066619	-0.0269167	0.00313427	0.0228568	0.0197363	0.00162716	0.0259738	0.0260071	0.00866799	0.0596019	0.157756	0.0386513	0.0375044	0.0070202	0.98404	0.950759	0.703708	0.93255	0.377326	0.639666	0.772582	0.599258	0.863155	0.472947	0.655263
BMI-rs6669341	G	A	1	-0.00873605	0.0130395	0.00426634	0.033589	0.0298759	0.00633007	-0.105205	-0.235553	-0.0121447	-0.0215057	-0.00389091	0.0238805	0.0192393	0.00163573	0.0261028	0.0261365	0.00870898	0.0598604	0.160747	0.0388035	0.0377305	0.00701725	0.714497	0.497927	0.00910221	0.198167	0.25301	0.467322	0.0788328	0.142822	0.754298	0.568691	0.579252
BMI-rs6722268	T	C	0.00251807	0.00579679	-0.00802436	-0.00192879	-0.0738649	-0.0141624	-0.0127623	-0.152682	-0.282088	-0.0740973	-0.0784715	0.010139	0.036191	0.0184002	0.00184651	0.0295343	0.0295838	0.00986072	0.0681207	0.182686	0.0439393	0.0427612	0.00797563	0.872746	0.662763	0.296228	0.0123854	0.632136	0.195578	0.0250045	0.122563	0.0917291	0.0664911	0.203642
BMI-rs6725549	A	C	0.00128088	-0.0259626	0.00523133	-0.0101072	-0.0589314	-0.0257089	-0.0196485	-0.193903	0.0635966	-0.0327371	0.0160382	-0.0186864	0.0538122	0.0197394	0.00214337	0.0341901	0.0342571	0.01143	0.080555	0.21531	0.0509754	0.0496788	0.00931082	0.629474	0.790994	2.41168e-06	0.0847741	0.452973	0.0856082	0.016081	0.76771	0.520736	0.746819	0.0447559
BMI-rs6739755	G	A	0.00740403	-0.0362393	-0.00458966	0.000746264	0.0111209	-0.0115738	-0.0166365	0.0636919	-0.287833	-0.0233023	-0.0132454	0.00564874	0.02507	0.0189906	0.00166064	0.0264493	0.0264738	0.00881944	0.0606629	0.163801	0.0392195	0.0381519	0.00717038	0.148312	0.809028	0.653156	0.674149	0.661982	0.0592502	0.293751	0.0788837	0.552412	0.72846	0.430821
BMI-rs6741951	G	A	0.0167712	0.0029722	0.0131116	0.0025103	0.0318271	0.0260881	0.000600866	-0.112031	-0.156833	0.000117076	0.00179143	-0.0113339	0.0334608	0.0183683	0.00180082	0.0287669	0.0288064	0.00958996	0.0658625	0.176073	0.0426084	0.0414496	0.00775086	0.92922	0.475342	0.163325	0.268563	0.365128	0.950041	0.0889485	0.373076	0.997808	0.965527	0.143666
BMI-rs67481408	T	TA	0.0302442	-0.0199512	0.00305048	0.00266295	0.034381	0.019845	0.00472718	0.0232559	-0.583689	0.00554029	0.083837	0.00569138	0.0352974	0.0185103	0.00183747	0.0294093	0.0294364	0.00980458	0.0683065	0.177146	0.0436832	0.0423668	0.00791739	0.571918	0.869102	0.147269	0.242385	0.500207	0.629707	0.733508	0.000984491	0.899076	0.0478363	0.472237
BMI-rs6752378	C	A	0.00978574	-0.0119439	-0.0120491	0.00302432	0.0664581	0.0294239	0.0180768	0.0463409	0.0160822	0.0606594	-0.0408821	-0.00236575	0.0214966	0.020751	0.00162186	0.0258379	0.0258681	0.00863259	0.0593857	0.157793	0.038356	0.0374019	0.00697756	0.578472	0.561477	0.0622208	0.0101084	0.255346	0.0362596	0.435193	0.918821	0.113769	0.274374	0.734572
BMI-rs6760379	T	C	0.00454627	-0.0242964	0.00335881	-0.000889424	-0.062473	0.0132596	0.00584218	-0.0960748	0.316862	-0.0536483	-0.00247925	-0.00288267	0.0314316	0.0183853	0.00176806	0.0282002	0.0282311	0.00940115	0.0652076	0.172593	0.0419328	0.040967	0.0075897	0.439527	0.855042	0.614928	0.0267376	0.638584	0.534315	0.140653	0.0663744	0.200762	0.951743	0.704084
BMI-rs67609008	T	C	0.623283	-0.0867216	0.0954481	-0.000981938	0.0718062	0.0250288	0.00954298	0.0133569	0.0743255	0.0282636	-0.00598195	-0.0113994	0.0337087	0.0182602	0.00179978	0.0287586	0.0287988	0.00960216	0.0663185	0.178416	0.0428085	0.0415896	0.00774431	0.0100921	1.7231e-07	0.585349	0.0125304	0.384797	0.320303	0.840382	0.676982	0.509105	0.885632	0.14103
BMI-rs6795366	C	T	0.00585779	0.000691027	-0.016595	-0.00179104	-0.0139551	-0.0328244	-0.0193437	0.0437749	0.167315	0.0141564	0.0285264	0.00135198	0.0357106	0.0182873	0.00183163	0.0292655	0.0293072	0.00977508	0.0680367	0.183825	0.0436227	0.0423244	0.00792003	0.984561	0.364162	0.328156	0.633473	0.262709	0.0478313	0.519964	0.362726	0.745546	0.500316	0.864457
BMI-rs6798941	C	T	0.0097201	0.00608594	-0.0261172	-0.000157459	0.0397418	0.00407411	0.0232641	-0.0120554	-0.0862972	-0.0550326	-0.0852177	-0.0175353	0.0326192	0.0182858	0.00177937	0.0284509	0.0284804	0.00950689	0.0652845	0.175633	0.042265	0.0411189	0.00768198	0.851994	0.153214	0.929486	0.162457	0.886251	0.0144026	0.853496	0.62318	0.192889	0.0382231	0.0224521
BMI-rs6857	C	T	0.00243828	0.0102266	0.0271755	0.00673586	-0.00485963	0.0558741	-0.010572	0.00494665	-0.246475	0.194608	0.0787597	0.000960761	0.0539137	0.0196281	0.00214543	0.0342042	0.0342526	0.0114174	0.0799684	0.204498	0.0495356	0.0494228	0.00927476	0.849557	0.166199	0.00169182	0.887019	0.102842	0.354468	0.950676	0.228102	8.5461e-05	0.11103	0.917496
BMI-rs6898357	G	A	0.07884	-0.00131147	0.0210666	-0.00091523	-0.0117088	0.030235	0.0113983	0.0172089	-0.0590972	-0.0180636	-0.0981796	-0.00762123	0.0300319	0.0182219	0.00173641	0.0276184	0.0276528	0.00921796	0.0629333	0.169025	0.0410596	0.0399536	0.00748281	0.965168	0.247635	0.598136	0.671603	0.274228	0.216262	0.78451	0.726612	0.659985	0.0139981	0.308443
BMI-rs6938973	C	T	0.00673144	-0.00870054	0.010225	1.96161e-05	0.0185986	-0.0116708	-0.0173659	-0.0478167	0.00147194	-0.0189447	0.0211974	0.00542619	0.0248652	0.018969	0.00164908	0.0263539	0.0263847	0.00877341	0.0607196	0.159464	0.0392305	0.0382413	0.00707753	0.726407	0.589862	0.990509	0.480359	0.658248	0.047775	0.43099	0.992635	0.629163	0.579371	0.443274
BMI-rs6979717	T	G	0.00277767	0.0535167	0.0208924	0.0015563	-0.0848572	-0.0288554	-0.0200995	0.0931106	0.00296639	-0.00734975	-0.000684595	-0.00779112	0.0675593	0.0208228	0.00235252	0.0375013	0.0375759	0.012522	0.0873643	0.233976	0.0559811	0.0543177	0.0101015	0.428278	0.315697	0.508263	0.0236499	0.442533	0.108465	0.286526	0.989885	0.895546	0.989944	0.440539
BMI-rs7009996	C	A	0.0315763	-0.109714	0.0893036	0.00547596	-0.00804198	0.0234438	0.0127256	-0.126431	-0.33854	-0.0464532	-0.0990301	-0.00485626	0.0273148	0.0184375	0.00168523	0.0269202	0.0269353	0.00897435	0.0619378	0.1624	0.040017	0.0389427	0.00730011	5.90498e-05	1.27589e-06	0.00115674	0.765143	0.384096	0.156193	0.0412269	0.0371059	0.24571	0.0109924	0.505904
BMI-rs7030732	A	C	0.0068336	0.00341828	0.0181977	0.00315804	0.0474647	0.0569994	0.00873339	0.00302254	-0.128705	0.0295927	-0.00826146	-0.0018887	0.0252207	0.0188455	0.00165149	0.0263978	0.0264362	0.00881458	0.0604166	0.165382	0.0392986	0.0381169	0.00714387	0.892189	0.334232	0.0558471	0.0721693	0.0310755	0.321789	0.9601	0.436435	0.451438	0.828411	0.791487
BMI-rs710995	G	A	0.00451356	0.0100362	0.0175345	-0.00212764	0.0483859	-0.0175548	0.0174326	-0.163062	0.178715	-0.0200818	-0.0517628	-0.00292254	0.0224601	0.0200118	0.0016249	0.0259684	0.025995	0.00868603	0.0597006	0.157936	0.0386028	0.0374802	0.00703079	0.654987	0.380917	0.190401	0.0624271	0.499476	0.044754	0.00630845	0.257817	0.602913	0.16726	0.677647
BMI-rs7124681	C	A	0.00503361	0.000744665	0.0262324	-0.00361641	0.00541395	-0.0604139	0.0206028	-0.100256	-0.378548	-0.0701732	-0.0716921	-0.00295012	0.0243541	0.019068	0.00163717	0.0261715	0.0262196	0.00873938	0.0598599	0.160345	0.0389111	0.0379662	0.00712507	0.975607	0.168908	0.0271797	0.836116	0.0212152	0.0184007	0.0939645	0.0182349	0.0713234	0.0589858	0.67884
BMI-rs7132908	G	A	0.987293	-0.0149663	-0.0280314	0.00235563	-0.00397692	-0.0632992	0.0192943	0.0139421	-0.0336616	-0.0379707	-0.0891897	-0.0160486	0.0257029	0.0187829	0.00166143	0.0265145	0.0265524	0.00885042	0.0607617	0.159628	0.0394703	0.0383042	0.00716224	0.560376	0.135598	0.156242	0.880772	0.0171293	0.0292554	0.818516	0.832985	0.336047	0.0198892	0.0250457
BMI-rs71364388	G	GT	0.0033011	-0.00232387	-0.0264039	-0.00505555	0.0409657	-0.061696	0.0171068	0.0752204	0.384954	0.00793869	0.0249687	0.00479728	0.026375	0.0223297	0.00186017	0.029697	0.0297308	0.00990283	0.0674065	0.182678	0.0440975	0.0428736	0.00796265	0.92979	0.237025	0.00657238	0.167755	0.0379737	0.0840853	0.264457	0.0350943	0.857132	0.560311	0.546861
BMI-rs71401664	C	A	0.00913289	0.029356	-0.00402784	0.00203098	0.0434759	0.0369369	0.00968699	-0.0624094	-0.224378	-0.00713586	0.0836685	0.00484312	0.0610945	0.0203548	0.00226006	0.0361109	0.0361812	0.0120611	0.0832853	0.219134	0.0536908	0.0522281	0.00968309	0.630872	0.843138	0.368846	0.228608	0.30731	0.421882	0.45365	0.305868	0.894268	0.109161	0.616961
BMI-rs71483681	C	T	0.000326071	0.00608874	-0.0147402	-0.003466	-0.0253888	-0.071614	-0.0322553	-0.0432374	-0.161527	-0.0500315	-0.083978	-0.00957922	0.0218875	0.0212455	0.00166014	0.0264922	0.0265154	0.00881712	0.0609369	0.163971	0.0392549	0.0382062	0.00716344	0.780871	0.487805	0.0368184	0.337886	0.00691673	0.000253993	0.477988	0.324578	0.202478	0.027949	0.181147
BMI-rs71579590	G	C	0.0786679	0.0755816	0.0444125	0.00309572	0.0743908	0.0360475	0.0269101	-0.129716	-0.00723062	-0.0115269	-0.0192265	-0.0126511	0.0638473	0.0208031	0.00232432	0.037067	0.0371205	0.0123022	0.0853105	0.232222	0.0551963	0.0535509	0.0100378	0.236499	0.0327703	0.1829	0.0447588	0.331502	0.0287131	0.128382	0.975161	0.834578	0.719572	0.207547
BMI-rs7161194	G	A	0.0174073	0.0149387	-0.00798827	0.000898617	-0.0125375	-0.0177011	0.0243676	-0.069915	-0.220303	-0.0190923	-0.0482767	-0.00373918	0.0327228	0.0198656	0.00189095	0.0301331	0.0301717	0.0100509	0.0691457	0.18162	0.0446596	0.0435144	0.00816321	0.648014	0.687599	0.634631	0.677359	0.557421	0.0153338	0.311957	0.225137	0.66901	0.267242	0.646915
BMI-rs7162533	T	C	0.00201074	-0.0398595	-0.00397866	0.0020237	0.037496	-0.0163244	0.0188709	-0.0822628	0.0734448	-0.014897	-0.0397625	-0.000438942	0.0233316	0.0195092	0.00162962	0.0260451	0.0260787	0.00869592	0.0600722	0.159822	0.0387471	0.0376117	0.00698671	0.0875653	0.838403	0.214302	0.149966	0.531338	0.030001	0.170875	0.645845	0.700632	0.290428	0.949906
BMI-rs7181498	C	T	0.0011054	0.00763737	-0.0192002	-0.00262679	0.0136486	0.0347784	0.0120874	-0.0122592	-0.184574	-0.072443	-0.0649912	-0.00480801	0.0274332	0.0184748	0.00169018	0.0269772	0.0270093	0.00901344	0.0620485	0.166828	0.040165	0.0390309	0.00725919	0.780706	0.298681	0.12015	0.612906	0.197871	0.179908	0.843378	0.268565	0.0712906	0.0958904	0.507758
BMI-rs7203707	A	C	0.145475	0.0231666	0.0168859	-0.000449422	-0.0120369	0.0221584	-0.0102193	-0.0230518	0.0632276	-0.0140476	-0.0433262	-0.0090608	0.0216284	0.020729	0.00162902	0.0259814	0.0260257	0.00868625	0.0599841	0.15993	0.0386735	0.0376069	0.00702279	0.284117	0.415301	0.782636	0.643157	0.394545	0.2394	0.700758	0.692588	0.71643	0.24929	0.196983
BMI-rs7230034	C	T	0.0522284	0.0238306	-0.00497781	-0.00255583	0.0118705	0.00581235	0.00185437	0.0150422	-0.122745	-0.0343146	0.0795996	-0.00495845	0.0803616	0.0221829	0.00255012	0.0405954	0.0406788	0.013562	0.0939233	0.249534	0.0608042	0.0589237	0.0111075	0.766816	0.822447	0.316229	0.769973	0.886382	0.891242	0.87276	0.622792	0.57252	0.176731	0.655305
BMI-rs7264802	G	A	0.00504989	0.0191962	-0.0044563	0.00155984	-0.00416483	0.053217	0.00800163	-0.0383207	-0.31336	0.0723529	0.0119837	-0.0104715	0.0376467	0.0184583	0.0018744	0.0299308	0.029963	0.0099935	0.0685476	0.182815	0.0443666	0.0432798	0.00816181	0.61012	0.809225	0.405305	0.889333	0.0757185	0.423316	0.576136	0.0865142	0.102935	0.781865	0.199499
BMI-rs72892910	G	T	0.07892	0.019265	-0.0103971	0.00368586	-0.00519978	-0.074043	0.0398166	-0.230555	-0.0543358	-0.0154081	-0.0782392	-0.0145946	0.0540882	0.0197355	0.00214467	0.0342818	0.0343038	0.0114151	0.0770631	0.20695	0.050784	0.0492482	0.00923807	0.721709	0.598317	0.085686	0.879441	0.030894	0.000486636	0.00277397	0.792893	0.761582	0.112136	0.114147
BMI-rs72953779	A	C	0.00349317	0.0556307	0.00687214	0.00152743	0.0468017	-0.0416156	0.000663653	0.162831	0.0519959	0.0514904	0.0552972	0.0123975	0.0454399	0.0189419	0.00200746	0.0320177	0.0320642	0.010693	0.0729959	0.196243	0.0474975	0.0462894	0.00864834	0.220851	0.716754	0.446733	0.143813	0.194328	0.950512	0.025703	0.791043	0.278338	0.232246	0.151713
BMI-rs7358274	C	T	0.00886145	0.114828	-0.0682351	0.000566608	-0.0580274	-0.0339464	-0.0111957	0.053605	-0.146415	-0.0363272	-0.0269337	-0.0135109	0.0350607	0.0186784	0.00185542	0.0296064	0.0296392	0.00989061	0.0682541	0.178863	0.0440729	0.0429176	0.00802357	0.0010563	0.000259094	0.760077	0.0500014	0.252078	0.257655	0.432235	0.413024	0.409797	0.530288	0.0922038
BMI-rs7372674	C	A	0.965713	-0.021715	0.00891415	0.00108329	-0.0206445	-0.017766	0.0122094	0.0203907	0.194002	0.00659045	-0.0473519	0.0153534	0.0271827	0.0184721	0.00168204	0.0268596	0.0268831	0.00894854	0.061167	0.161944	0.0398887	0.0388187	0.00725881	0.424375	0.629398	0.519553	0.442127	0.508702	0.172443	0.738862	0.230935	0.86877	0.222534	0.0344201
BMI-rs7377083	C	A	0.189208	0.00815669	-0.0145794	0.00438376	0.00140093	0.0470574	0.0178367	-0.0232374	-0.0556805	0.0403911	0.0239527	-0.00755348	0.0237287	0.0197027	0.00165042	0.026355	0.0263926	0.00879003	0.0603934	0.161301	0.0391826	0.0380716	0.00709033	0.731036	0.459318	0.00790447	0.957608	0.0745912	0.0424399	0.700411	0.729947	0.302616	0.529253	0.286732
BMI-rs7444298	A	G	0.0217134	0.0108166	0.000642017	-0.00713104	-0.0216516	0.016521	-0.0179451	0.0522176	0.538819	0.0244492	0.0962936	0.00205764	0.0402222	0.0184912	0.00191627	0.0305154	0.0305546	0.0101877	0.0712338	0.191238	0.0454026	0.0441663	0.00836777	0.787991	0.972303	0.000198239	0.477996	0.588713	0.0781631	0.463531	0.00483987	0.590235	0.0292405	0.805759
BMI-rs7459710	C	T	0.00303649	0.155264	-0.102692	-0.00164534	-0.00180992	0.0064949	-0.0200901	0.0895402	-0.154492	-0.0148146	0.00133931	0.007175	0.0232716	0.0195735	0.00163307	0.0261002	0.0261326	0.00870588	0.0600904	0.162936	0.0389017	0.0378204	0.00703772	2.53222e-11	1.55154e-07	0.31369	0.944715	0.80372	0.0210193	0.136201	0.34304	0.703337	0.971751	0.307964
BMI-rs7498044	G	A	0.00559278	-0.0212131	-0.0190133	-0.00229131	0.00125048	-0.062955	-0.0101638	0.118542	0.213589	0.0158699	0.101866	0.0196046	0.0436558	0.0189331	0.00198722	0.0317445	0.0317701	0.0105588	0.0728854	0.192337	0.0474136	0.045903	0.00858894	0.627026	0.315266	0.248903	0.968578	0.047527	0.335752	0.103862	0.266787	0.737842	0.0264772	0.022459
BMI-rs7519259	A	G	0.0140502	-0.00390924	-0.0265359	-0.00222621	-0.00257496	-0.00759317	-0.0289801	-0.00449675	0.0762228	-0.0145036	-0.0190943	0.0118961	0.022153	0.020427	0.00163843	0.0261009	0.0261377	0.00870934	0.0597823	0.156936	0.0387405	0.0377495	0.00705319	0.859928	0.193924	0.17423	0.921413	0.771429	0.000876513	0.940041	0.627185	0.708122	0.612987	0.0916774
BMI-rs752843328	GAA	G	0.0501158	0.0185849	0.0121998	0.0021549	0.0694063	-0.0265169	0.0160992	-0.0209271	0.0596206	0.00734001	0.0522759	-0.00148083	0.0446348	0.0189914	0.00200105	0.0319971	0.03205	0.0106482	0.073533	0.19245	0.0475396	0.0462227	0.00876345	0.677134	0.520625	0.281532	0.0300731	0.408035	0.130556	0.775955	0.756715	0.877296	0.258075	0.865814
BMI-rs7539903	A	T	0.00479551	-0.0098453	-0.0174485	-0.00249687	0.0140068	0.0196143	-0.00167829	0.169433	0.296549	0.0651895	0.0561235	-0.00263139	0.0255945	0.0188014	0.0016641	0.026499	0.0265446	0.00884872	0.0609118	0.163958	0.0393687	0.0382648	0.00715162	0.700486	0.353387	0.133503	0.597097	0.459957	0.849572	0.00540933	0.0705001	0.0977501	0.142456	0.712916
BMI-rs7542	G	C	0.443218	-0.0462066	0.0112152	0.000495607	0.0223715	-0.0192837	-0.00746233	-0.0644041	0.0757991	-0.034767	0.0982492	0.0152793	0.0230618	0.0196243	0.00162816	0.0259572	0.0259962	0.00865952	0.0596959	0.156216	0.0384589	0.0374806	0.00700091	0.0451139	0.567664	0.760826	0.388763	0.458216	0.388826	0.280647	0.62752	0.365994	0.00875944	0.029076
BMI-rs7549358	C	G	0.0237052	0.0357822	0.000439517	-0.00199033	-0.00671475	0.00992017	0.0173351	-0.0769956	-0.14145	-0.0375273	-0.048816	0.00682538	0.0273335	0.0184452	0.00168696	0.0269018	0.0269395	0.00896689	0.0620454	0.163704	0.0400683	0.0390364	0.00724486	0.190502	0.98099	0.238069	0.802895	0.712695	0.0532087	0.214623	0.387556	0.348975	0.21111	0.346143
BMI-rs7561278	T	C	0.00216826	-0.0815402	0.0231949	-0.00204068	-2.77031e-05	0.034085	-0.00421402	0.138343	0.477755	-0.0413397	0.102121	0.00663425	0.0434696	0.0189544	0.00198115	0.0317108	0.0317561	0.0106005	0.072903	0.188047	0.0472703	0.045854	0.00858564	0.0606841	0.221057	0.302989	0.999303	0.283121	0.690977	0.0577463	0.0110665	0.381826	0.0259424	0.439693
BMI-rs76001670	T	C	0.0058396	-0.0057836	0.0200087	-0.00358419	-0.102242	0.0963197	-0.041456	0.124404	0.307776	-0.0370224	0.0777624	-0.0161458	0.130944	0.0265895	0.00315899	0.0504875	0.0506346	0.0169523	0.119653	0.29646	0.0750008	0.0732883	0.0137355	0.96477	0.451749	0.256545	0.042858	0.0571393	0.0144675	0.298478	0.299192	0.621571	0.28867	0.239804
BMI-rs76040172	G	A	0.151133	-0.0388098	-0.0097582	0.00246733	-0.0398875	0.0244906	-0.00543381	-0.00302806	-0.182616	0.0488668	-0.0509269	0.0195752	0.170063	0.0297321	0.00359422	0.0571737	0.0572121	0.0191057	0.134985	0.366389	0.0849649	0.0827446	0.0155794	0.819485	0.742758	0.492417	0.485394	0.668603	0.776099	0.982103	0.618187	0.565197	0.538245	0.208945
BMI-rs76267866	A	T	0.00160506	-0.0216096	0.00650624	-0.000319574	-0.0312265	0.0631041	0.00673315	-0.179413	-0.230248	-0.0778158	-0.0652103	0.0169834	0.0447177	0.0188265	0.00198689	0.0317878	0.0318275	0.0105676	0.0720357	0.196796	0.0471732	0.0458316	0.00851456	0.628923	0.729652	0.872219	0.325932	0.0474033	0.524027	0.0127531	0.24201	0.0990318	0.154789	0.0460853
BMI-rs76387394	A	G	0.00390112	-0.614193	0.124078	-0.00249176	0.0692985	0.0295847	0.0456848	-0.282033	0.318534	-0.0258434	0.0283232	-0.000898792	0.173142	0.0296	0.00356376	0.0570491	0.0571559	0.0190674	0.129873	0.358571	0.0846002	0.0822926	0.0153815	0.000389217	2.76822e-05	0.484431	0.224475	0.604728	0.0165777	0.0298859	0.374356	0.760003	0.730714	0.953403
BMI-rs7669124	G	A	0.00133573	0.0143943	0.0189361	0.000346543	0.00353489	-0.027444	-0.0084927	0.0890685	-0.0629218	0.00274953	-0.0294273	-0.00994974	0.0269	0.0186464	0.0016878	0.0269168	0.026933	0.00896227	0.0615315	0.165111	0.0399261	0.0389322	0.00724975	0.592577	0.309854	0.83732	0.895517	0.308217	0.343331	0.147751	0.703139	0.945097	0.449734	0.169934
BMI-rs767680669	TA	T	0.00365193	-0.0652533	0.00317342	0.000334021	0.00653603	-0.0400773	0.00750708	-0.10944	-0.277279	-0.0208235	-0.0285666	0.0090121	0.0488137	0.0193618	0.00207726	0.0331446	0.0331911	0.0110672	0.0754009	0.200504	0.049208	0.0480578	0.00886196	0.181295	0.869809	0.872252	0.843673	0.227252	0.497572	0.14666	0.166693	0.67217	0.552231	0.309183
BMI-rs769675	T	C	0.00056446	0.0123343	-0.00533212	-0.00151914	-0.0431196	0.0340007	-0.00281253	0.0170412	0.0769595	-0.0266024	-0.0339191	0.00793782	0.0294126	0.0184016	0.00172929	0.0275929	0.027653	0.00920911	0.063667	0.16592	0.0411853	0.0400771	0.00744912	0.674957	0.771997	0.379685	0.118123	0.218868	0.760056	0.78896	0.642766	0.518332	0.397361	0.286604
BMI-rs7715256	T	G	0.00777702	0.0320318	0.0066963	0.00163675	0.0460712	-0.00348831	0.0169172	0.0246853	0.119971	-0.0152242	-0.0311281	-0.00466901	0.0235616	0.0193368	0.00162987	0.026026	0.0260739	0.00868296	0.0596227	0.158359	0.0387273	0.037707	0.00702894	0.173993	0.729119	0.315273	0.0766946	0.893572	0.0513774	0.678856	0.448697	0.694236	0.409075	0.506528
BMI-rs776543236	ATGGAG	A	0.122515	0.046762	0.00118277	0.000699279	0.085009	-0.035492	0.00255101	-0.00868926	-0.33312	0.0400828	-0.0211012	-0.00237149	0.0400826	0.0191102	0.00196283	0.0312413	0.031286	0.0104202	0.0717232	0.191587	0.0465392	0.0452868	0.00852425	0.243356	0.950649	0.721645	0.00650803	0.256613	0.806601	0.903572	0.0820824	0.389091	0.641256	0.780855
BMI-rs777253131	A	AC	1	-0.0062603	0.0135416	0.0032126	-0.0100014	0.0142865	0.0141115	-0.0743191	0.165903	-0.0113862	-0.010162	-0.00135889	0.0217438	0.0216542	0.00167036	0.026623	0.026653	0.00886357	0.0614322	0.164188	0.039645	0.0385089	0.00718274	0.773414	0.531739	0.0544442	0.707165	0.591946	0.111368	0.226367	0.312283	0.773956	0.791868	0.849946
BMI-rs7774	C	A	0.04405	-0.0392842	-0.00368594	-0.000186323	0.0413216	0.00192446	0.0133954	-0.159752	-0.00537454	-0.0535241	-0.0221235	-0.0185321	0.031422	0.0184163	0.0017715	0.0282308	0.0282618	0.00942166	0.0649364	0.176647	0.0418998	0.0408656	0.00764949	0.211223	0.841367	0.916234	0.143276	0.945711	0.155097	0.0138893	0.975728	0.201452	0.588252	0.0154089
BMI-rs77762353	AT	A	0.00315088	0.0120107	0.00548501	-4.66819e-05	0.023369	0.0134852	0.020283	0.106007	0.147583	0.0529704	-0.00751273	-0.00845034	0.0311053	0.0183082	0.00175216	0.0280119	0.0280582	0.00933315	0.0640714	0.169456	0.0415124	0.0404827	0.00756793	0.699401	0.764487	0.978745	0.40414	0.630789	0.0297643	0.0980254	0.383799	0.201952	0.852775	0.264168
BMI-rs779765342	CT	C	0.000492519	0.00666557	-0.00666193	-0.00118971	-0.00116308	0.00517247	0.0175358	-0.072852	-0.406873	-0.0981008	-0.0100884	-0.0107466	0.0559934	0.0198916	0.00218102	0.0348573	0.0349172	0.0116829	0.081002	0.216867	0.0518727	0.0503423	0.00943466	0.905242	0.737691	0.585421	0.973382	0.882236	0.13336	0.368448	0.060637	0.0586016	0.841172	0.25468
BMI-rs784257	C	T	0.069684	0.000831145	-0.0126144	-0.00140653	-0.113908	-0.0701433	-0.026385	-0.0298112	-0.0114164	-0.0710841	-0.00198044	0.00429373	0.0503389	0.0193612	0.00208639	0.0333704	0.0334113	0.0111398	0.0768667	0.205736	0.049613	0.048288	0.00909841	0.986827	0.514705	0.500219	0.000641563	0.0357837	0.0178595	0.698142	0.955748	0.151925	0.967286	0.636984
BMI-rs78520390	C	T	0.00408749	-0.106884	0.0170449	0.00153881	0.0332569	-0.00943371	0.0190196	-0.19843	0.0652889	-0.0445265	-0.0858818	-0.00157731	0.109402	0.0249185	0.00292511	0.0467754	0.0467978	0.0155759	0.106899	0.293599	0.0694299	0.0673532	0.0125887	0.328577	0.493958	0.59884	0.477091	0.840242	0.222051	0.0634219	0.824022	0.521318	0.202277	0.900289
BMI-rs7919	C	A	1	-0.0137913	0.00846482	0.00156566	-0.011729	-0.0272424	-0.0156452	0.00455507	-0.0687996	0.0108168	0.0475547	-0.0133234	0.0227057	0.0199657	0.00162681	0.0260413	0.0260872	0.00869127	0.0595523	0.159475	0.0386545	0.0376809	0.00701765	0.543591	0.67159	0.335844	0.652422	0.296357	0.0718456	0.93903	0.666168	0.779606	0.206938	0.0576257
BMI-rs7924036	T	G	0.0027597	-0.0904103	0.0759267	-0.00189821	0.0139714	0.0455665	0.00154557	-0.0768806	-0.0497482	-0.0496717	-0.0351397	-0.00572703	0.0210704	0.020894	0.00161102	0.0257637	0.0257976	0.00858638	0.0593306	0.15643	0.0383554	0.037253	0.00698016	1.78041e-05	0.000279218	0.238692	0.587619	0.0773452	0.85715	0.195045	0.750468	0.195309	0.345544	0.411948
BMI-rs79344865	G	T	0.00268561	-0.0211336	0.0108708	0.0024149	0.0369854	-0.0217324	0.013053	-0.0395991	-0.0754483	0.0159232	-0.0254168	0.0018161	0.022229	0.0201103	0.00162609	0.0258986	0.0259155	0.00862599	0.0593688	0.16019	0.0384633	0.0373864	0.00701182	0.341746	0.588812	0.137518	0.153269	0.401703	0.130225	0.504772	0.637646	0.678886	0.496606	0.795631
BMI-rs7998206	T	C	0.00595593	-0.037362	-0.00824691	-0.00162938	-0.0934871	-0.0501	-0.0210251	0.0715458	-0.119952	-0.0850307	-0.00316711	0.00670262	0.0410085	0.0185546	0.00192406	0.0307399	0.0307701	0.0102723	0.0717326	0.190349	0.0457242	0.0444905	0.00834863	0.362255	0.656705	0.397082	0.00235639	0.103483	0.0406816	0.318573	0.528586	0.062938	0.94325	0.422068
BMI-rs8011566	T	A	0.0238569	0.000104361	-0.00351622	0.00374803	0.0400049	0.00468483	-0.00511871	0.0600456	0.172404	-0.0134747	0.0196134	0.00208057	0.0237903	0.0194339	0.00163921	0.026206	0.0262358	0.00874537	0.0605439	0.164498	0.0390316	0.0378187	0.00706802	0.9965	0.856421	0.0222266	0.126874	0.858278	0.558343	0.321311	0.29461	0.729925	0.60403	0.76848
BMI-rs80181264	G	A	0.00522692	-0.0715144	-0.00242839	-0.00252199	-0.0487969	0.0302088	0.00441349	-0.087491	-0.274217	-0.122297	-0.0753959	-0.00720073	0.0766958	0.0218967	0.00249689	0.0399116	0.0399375	0.0133006	0.0899219	0.235975	0.059097	0.0573194	0.0107233	0.351109	0.911694	0.31247	0.221473	0.449409	0.740021	0.330571	0.245213	0.0385075	0.18839	0.501901
BMI-rs8055543	T	C	0.00520099	0.00670376	-0.00397054	-0.00351098	-0.0134117	-0.00835196	-0.0193714	-0.0351488	0.158887	0.0123741	0.116638	0.00464539	0.06457	0.0206923	0.00231604	0.0369571	0.0369824	0.0122757	0.0851766	0.237448	0.0549377	0.0534285	0.00989765	0.917311	0.847832	0.129535	0.71668	0.821329	0.114561	0.679858	0.503405	0.821794	0.0290324	0.638826
BMI-rs8078135	C	T	0.00991203	0.0194487	-0.00954308	0.00164256	0.0123068	0.00883308	-0.00850889	-0.157879	-0.13379	-0.0131404	0.0268818	0.00818653	0.021473	0.0208499	0.00162388	0.0259553	0.0259946	0.00866505	0.0598292	0.15907	0.0387098	0.0376719	0.00705868	0.365082	0.647165	0.311778	0.635391	0.734004	0.326112	0.00831999	0.400304	0.734265	0.47549	0.24614
BMI-rs8132491	G	A	0.0215574	-0.040129	0.00871538	-0.000358994	-0.00176322	0.045318	-0.0100726	0.0501605	0.121201	-0.0240028	0.00797148	0.00763691	0.0329383	0.0190323	0.00183573	0.0293364	0.0293756	0.00979544	0.0671732	0.182423	0.0435615	0.0425332	0.00788609	0.223108	0.647006	0.844955	0.952073	0.122903	0.303812	0.455224	0.506438	0.581629	0.851333	0.332846
BMI-rs827803	T	G	0.000574427	0.0413895	-0.00109239	0.000948373	-0.00454923	0.00373421	-0.00043374	-0.0132945	0.0629851	-0.0630179	-0.0197602	-0.00212617	0.0232276	0.0195386	0.00162616	0.026005	0.0260527	0.00867852	0.0597737	0.161232	0.0386117	0.0375766	0.00702594	0.0747646	0.955414	0.55976	0.861129	0.886027	0.96014	0.823992	0.696058	0.102662	0.598982	0.762182
BMI-rs845084	G	A	0.0131799	-0.132383	0.0818303	-0.000338538	0.0060871	-0.019503	0.0162039	-0.103865	-0.305558	-0.044001	-0.0326372	0.00299835	0.0370343	0.0183915	0.00186494	0.0297395	0.0297841	0.0098924	0.0673205	0.177724	0.0442036	0.0428427	0.00809175	0.000350811	8.61665e-06	0.855954	0.837822	0.512591	0.101419	0.122871	0.0855635	0.319535	0.446185	0.710978
BMI-rs879620	T	C	0.000709343	0.0189212	-0.0052093	-0.00283798	-0.0829436	-0.0296101	-0.00297885	0.153419	-0.0249461	-0.0193187	-0.00441365	0.00972996	0.025851	0.0188507	0.00167489	0.0266693	0.0267165	0.00890535	0.0612713	0.164904	0.0396177	0.0385539	0.00721696	0.46421	0.782284	0.0901853	0.00187056	0.26773	0.738001	0.0122832	0.879758	0.625815	0.908858	0.177594
BMI-rs892261	C	T	0.00895101	0.0116367	-0.0254541	-0.000606405	-0.0138856	-0.00849681	-0.0242622	-0.0604021	0.124778	-0.0359159	-0.026954	-0.00682675	0.0228968	0.0196847	0.00162549	0.0259638	0.0260035	0.0086584	0.0591177	0.157071	0.0386238	0.037546	0.00701342	0.611297	0.195982	0.709104	0.592785	0.743852	0.00507648	0.306912	0.426961	0.352428	0.472824	0.330364
BMI-rs917154	A	G	0.00898354	-0.0411887	-0.0109767	-0.00187659	-0.0185733	-0.00516652	-0.028516	-0.109475	-0.0658779	-0.0365833	0.0377474	0.0163932	0.0595768	0.0201996	0.00224696	0.0357287	0.0358189	0.0119289	0.0825621	0.216175	0.0533544	0.0520004	0.00970299	0.489343	0.586847	0.403624	0.603174	0.885311	0.0168268	0.184848	0.760562	0.492925	0.467897	0.0911262
BMI-rs9277990	A	G	0.00690841	-0.039238	-0.0274871	-0.00390131	-0.0130565	-0.0158528	0.000943189	0.0989885	-0.0326819	-0.0411229	0.0152641	0.00284323	0.0496786	0.0192897	0.00207658	0.0331528	0.0331823	0.0110833	0.0752422	0.202547	0.049037	0.0477705	0.0088563	0.429624	0.15417	0.0602843	0.693708	0.632829	0.932182	0.18831	0.871814	0.40169	0.749324	0.74818
BMI-rs931452	T	C	0.00547129	0.00730834	0.0201799	-0.00180571	0.0405623	0.0365919	0.0154748	-0.062107	-0.0285779	0.00410076	-0.0159263	0.00639271	0.0221783	0.0202259	0.0016253	0.0259543	0.0259929	0.00865544	0.0593024	0.158406	0.0385529	0.0374173	0.00701944	0.741758	0.318413	0.266568	0.118092	0.159201	0.0737991	0.294966	0.856831	0.915291	0.670371	0.362447
BMI-rs9368828	T	A	0.00548862	0.0101271	0.00616189	0.00139954	0.0969354	0.0257587	0.0288723	-0.00453035	0.195408	0.0471011	0.0456358	-0.00572226	0.0291796	0.0187965	0.00174685	0.0278368	0.0278611	0.00925964	0.0640994	0.173558	0.0413293	0.0402491	0.00749023	0.728545	0.743047	0.423027	0.000497255	0.355206	0.00182052	0.943655	0.260211	0.254432	0.256866	0.444891
BMI-rs9372414	C	T	0.00462847	0.0125967	-0.0191901	0.000449302	0.0192241	-0.0126729	-0.00561443	-0.0450398	0.171666	0.0302013	0.000958466	-0.00361338	0.0280974	0.0184821	0.00170017	0.0272083	0.0272496	0.0090734	0.06248	0.16542	0.0404782	0.0393949	0.0073704	0.65392	0.299128	0.791573	0.479844	0.641883	0.536062	0.470992	0.299382	0.455601	0.98059	0.623954
BMI-rs9397127	A	G	0.000173666	0.0109831	-0.00313859	-0.000724147	0.0418081	0.0207822	0.00236671	0.0091357	-0.106107	-0.00236041	-0.0345116	0.00983971	0.0334103	0.018182	0.00179216	0.0285741	0.0286141	0.0095461	0.065592	0.175979	0.042601	0.0414046	0.00775773	0.742358	0.86295	0.686166	0.143429	0.46766	0.804193	0.889228	0.546541	0.955814	0.404552	0.204666
BMI-rs9423657	C	T	0.056766	-0.0774002	0.097132	-0.000542752	0.0179217	-0.0161599	0.0143323	0.0250983	-0.20882	0.057122	-0.0327046	-0.00268859	0.0309531	0.0183404	0.00175409	0.0280577	0.0280888	0.0093652	0.0647435	0.173703	0.0417216	0.0405741	0.00755253	0.0124003	1.18416e-07	0.757002	0.52299	0.565078	0.125924	0.69827	0.2293	0.170962	0.420217	0.721852
BMI-rs9435341	C	T	0.000705277	-0.0356229	0.00426884	1.65302e-05	-0.00158183	0.011801	-0.0122125	-0.100807	0.302425	0.00617188	0.0736925	-4.91709e-05	0.028505	0.0185081	0.00171833	0.027414	0.0274479	0.00913315	0.0628459	0.166198	0.0407459	0.0395798	0.00733754	0.211408	0.817589	0.992325	0.953986	0.667239	0.181172	0.108709	0.0688102	0.879603	0.0626228	0.994653
BMI-rs945211	C	G	0.00511775	0.00780213	-0.0037197	-0.00215481	0.00616645	0.0274933	-0.0102551	-0.0574823	-0.236419	-0.0227099	0.0197737	0.0147618	0.0256782	0.0187329	0.00166203	0.0265184	0.0265633	0.00886757	0.06087	0.161143	0.0394476	0.0383087	0.00714032	0.761248	0.842603	0.194806	0.816123	0.300665	0.247489	0.344994	0.142339	0.564821	0.605738	0.0386991
BMI-rs9466957	G	T	0.489113	0.00989361	0.00450103	0.000397014	0.0313727	-0.0212034	0.0299241	-0.243584	-0.361518	-0.0573223	-0.0339811	-0.0153736	0.0299693	0.0195989	0.00181592	0.0289392	0.0289861	0.00967213	0.0660594	0.178735	0.0430169	0.0417994	0.00776281	0.741306	0.818358	0.826939	0.278327	0.464474	0.00197602	0.000226657	0.0431105	0.182681	0.416245	0.047659
BMI-rs9471333	T	C	0.0490343	-0.0261808	-0.0415266	-0.00126735	0.000295508	0.00133378	0.0255017	-0.10799	-0.369054	-0.0654412	-0.0644702	-0.017777	0.0226792	0.0198021	0.00162205	0.0259041	0.025941	0.00864789	0.0588913	0.158205	0.0385262	0.0374597	0.00696897	0.248339	0.0359875	0.434614	0.990898	0.958994	0.00318942	0.0666975	0.0196613	0.089394	0.0852427	0.0107464
BMI-rs9478496	T	C	0.0198173	-0.131864	0.00366635	0.00524499	0.0412476	0.072964	0.0273159	-0.0581372	-0.359227	0.0379134	0.0335474	-0.0057841	0.0567059	0.0199086	0.00219843	0.0349881	0.0350249	0.0116298	0.080637	0.216634	0.0519863	0.0507443	0.00950367	0.0200513	0.853888	0.0170435	0.238437	0.0372338	0.0188361	0.470926	0.0972735	0.465822	0.508545	0.542779
BMI-rs9507895	G	C	0.00919148	0.0321626	-0.00221618	-0.00282384	-0.0039772	0.0295423	-0.00711365	0.0916121	0.459801	0.049123	0.0579171	0.00697433	0.0347401	0.0183759	0.00182113	0.0291271	0.0291655	0.00972254	0.0670261	0.176104	0.0431816	0.0420847	0.00788102	0.354548	0.904006	0.121	0.891389	0.3111	0.464373	0.171686	0.00902922	0.255294	0.168761	0.376184
BMI-rs9513018	T	G	0.000664111	0.0254719	-0.00585587	0.000546893	0.0176036	-0.00636538	0.000136582	0.0549109	-0.00818977	0.0144907	-0.0440759	-0.00864013	0.0258376	0.018799	0.00166685	0.0265937	0.0266265	0.00886012	0.0607292	0.163594	0.0394381	0.0384161	0.00718678	0.32421	0.755421	0.742837	0.508007	0.811058	0.987701	0.365895	0.960073	0.7133	0.251248	0.229278
BMI-rs9515446	A	G	0.00393177	-0.00659884	-0.0113262	0.00440748	0.01198	0.0109415	0.0175354	-0.0199184	-0.0608716	-0.0201897	0.0295552	-0.00512911	0.0226862	0.0197621	0.00162231	0.0259084	0.0259446	0.0086392	0.059082	0.159672	0.0384645	0.037481	0.00696567	0.771148	0.566558	0.0065922	0.643796	0.673226	0.0423833	0.736018	0.703033	0.59966	0.430384	0.461524
BMI-rs9522183	T	G	0.00301247	-0.0145475	-0.00485058	-0.00165218	0.0198681	0.0105944	0.021134	0.015238	0.0795368	0.0231443	-0.00176744	0.011232	0.0234414	0.0198665	0.00165181	0.0263738	0.0264122	0.00880132	0.060484	0.158912	0.0392261	0.0381434	0.00710174	0.53487	0.807108	0.317202	0.451255	0.688334	0.0163406	0.801093	0.616718	0.555177	0.963042	0.113746
BMI-rs9540493	G	A	0.0821755	-0.0211793	0.00412597	0.000646116	0.0274916	-0.0389796	0.0211558	-0.0384726	-0.177378	0.0212854	-0.0285506	-0.0115642	0.0226051	0.0200428	0.00163677	0.0260803	0.026109	0.00870205	0.0602368	0.160146	0.0387814	0.0376737	0.00704251	0.348797	0.836902	0.693027	0.291833	0.135449	0.0150527	0.523026	0.268032	0.583105	0.448549	0.10058
BMI-rs9556294	C	A	0.00907734	0.0153586	0.00859975	-0.000342332	-0.0205802	-0.0203841	0.00386054	-0.00795098	-0.0338713	-0.0362773	-0.0188847	0.00480782	0.0296462	0.0182726	0.00172271	0.0275429	0.0275684	0.0092038	0.0635108	0.168049	0.0409431	0.0398709	0.00741944	0.604415	0.6379	0.842484	0.454942	0.459664	0.674887	0.900373	0.840264	0.375596	0.635753	0.516984
BMI-rs9579775	A	C	0.202784	-0.185036	0.008071	0.00185616	0.0547629	0.0459389	0.0155703	-0.0754988	-0.403371	-0.0176167	0.00239609	-0.00159188	0.0794468	0.0225139	0.00257827	0.0410718	0.0411191	0.0137263	0.092669	0.256646	0.0607792	0.05918	0.0110668	0.019857	0.719977	0.471573	0.18242	0.263904	0.256654	0.415237	0.11602	0.771933	0.967704	0.885625
BMI-rs9591143	C	T	0.0010467	-0.00480926	-0.0021517	0.00234017	-0.0185309	0.00738637	-0.0148701	0.153484	0.125198	0.0681323	0.0841837	0.00557611	0.0264671	0.0186031	0.001673	0.0267117	0.0267554	0.00890299	0.0617979	0.164475	0.0397459	0.0387044	0.00717037	0.855813	0.907919	0.161877	0.487846	0.782495	0.0948728	0.0130055	0.446538	0.0864944	0.0296285	0.436771
BMI-rs9615723	T	C	0.00605683	0.0195324	0.00334153	0.00160434	0.0406583	0.0496717	0.00539556	0.0599736	-0.144219	0.0532968	0.033028	0.0055259	0.0238153	0.0199802	0.00167168	0.0266679	0.0266964	0.0088926	0.0612422	0.164046	0.0397573	0.0385712	0.00723529	0.412125	0.86718	0.337199	0.127356	0.0628002	0.544019	0.32744	0.379326	0.180068	0.391841	0.445022
calcium-10:9317697_CTTA_C	CTTA	C	0.0178173	0.00499878	-0.000338556	-0.000111424	0.000107135	0.000735604	-0.000113031	0.00116324	0.00757656	0.00117793	-0.000969731	0.000235082	0.0020826	0.000508912	5.89958e-05	0.000942352	0.000944326	0.000316085	0.00223527	0.00590896	0.00136264	0.00132836	0.000256514	0.0163842	0.505888	0.0589376	0.909484	0.435997	0.720646	0.602783	0.199769	0.387347	0.46538	0.359432
calcium-10:9329035_AT_A	AT	A	0.019327	-0.00179692	0.00117488	8.90139e-05	-8.17359e-05	0.000819604	-8.71831e-05	-0.000557138	0.00348311	-0.000409262	-0.00053588	-5.07118e-05	0.000668651	0.000406504	3.81389e-05	0.000608738	0.000610511	0.000204739	0.0014166	0.00361285	0.000880626	0.000862366	0.00016287	0.0072022	0.00385022	0.0195998	0.893188	0.179439	0.670236	0.694103	0.335003	0.642118	0.534333	0.755525
calcium-10:96026184_CA_C	CA	C	0.00502736	0.000566397	6.40384e-05	4.20782e-05	0.000899642	-1.86046e-05	2.65032e-05	0.00109589	0.00108188	0.00142046	0.00268864	-7.66132e-05	0.000495143	0.000411457	3.45723e-05	0.000551098	0.000552585	0.000184932	0.0012949	0.00344029	0.000799791	0.000780067	0.000147641	0.252664	0.876318	0.223564	0.102586	0.973142	0.886043	0.397382	0.753161	0.075729	0.000567701	0.60382
calcium-1:207234410_TTA_T	TTA	T	0.00085584	-5.90585e-05	6.49526e-05	-3.0662e-05	-0.000598498	-3.80964e-05	-3.32126e-06	0.00115613	0.000117928	0.000768592	-0.000171165	0.000180472	0.000554237	0.00039848	3.54601e-05	0.000566918	0.000568559	0.000190448	0.00131688	0.00355629	0.000820111	0.000803492	0.000152511	0.91514	0.870518	0.387209	0.291104	0.946578	0.986086	0.379984	0.973547	0.348667	0.831307	0.236679
calcium-1:23747996_GA_G	G	GA	0.00285809	0.000251224	-0.000234073	-1.62825e-05	0.000320518	0.000391659	-2.028e-05	-0.00195728	-0.0069789	0.00175066	-0.000350563	2.72542e-05	0.000762496	0.000392629	3.93524e-05	0.00062715	0.000628933	0.000210977	0.00147262	0.00390747	0.000908557	0.00088384	0.000166195	0.741797	0.551063	0.67905	0.609302	0.533459	0.923422	0.183812	0.0740941	0.0539998	0.691636	0.86974
calcium-14:60602825_TA_T	TA	T	0.000645976	0.000833651	-0.00028762	-2.15541e-05	0.000688651	-0.000817676	-0.000430096	-0.00142428	0.000953805	0.00180023	0.000243077	0.000141002	0.0015747	0.000462152	5.2492e-05	0.000837829	0.00084036	0.00028154	0.00196145	0.00494017	0.00121169	0.00117778	0.000224712	0.596527	0.533712	0.681354	0.411108	0.330551	0.126599	0.467756	0.846903	0.137357	0.83649	0.530347
calcium-19:19756073_AGCC_A	AGCC	A	0.00188492	-0.00218652	-8.57519e-05	-7.17127e-05	-0.00346469	-0.00105379	-0.00045508	0.000867213	-0.001187	-0.00016293	-0.00121717	-0.000494669	0.00283391	0.000576057	6.8421e-05	0.00109324	0.00109594	0.000366479	0.00244641	0.00649859	0.00161602	0.0015283	0.000296027	0.440379	0.881664	0.294589	0.00152887	0.33628	0.214326	0.722977	0.855069	0.919692	0.425788	0.0947189
calcium-19:35552963_TA_T	T	TA	0.00465169	0.0027345	2.56959e-05	-3.33223e-05	-0.00191975	0.000808379	-0.000221805	0.0035882	0.000550557	0.00052293	0.000632616	0.000102521	0.00285574	0.000578422	6.82847e-05	0.00109215	0.00109529	0.000368767	0.00256829	0.00718149	0.00160061	0.0015523	0.000291056	0.338293	0.964566	0.625557	0.078787	0.460486	0.547522	0.16238	0.938891	0.74389	0.683616	0.724661
calcium-19:50028306_CCTGCTG_C	CCTGCTG	C	0.174421	-9.44159e-05	0.000141178	-1.72068e-05	0.000361271	-0.000581068	-0.000201232	-2.22516e-05	-0.0040315	0.00170887	0.000853973	0.000101322	0.000789522	0.000388889	3.94303e-05	0.000627038	0.000628851	0.000210192	0.00144963	0.00373765	0.000901888	0.000884638	0.000167164	0.904811	0.716584	0.662558	0.564511	0.355479	0.338381	0.987753	0.280759	0.0581256	0.334378	0.544435
calcium-3:121967229_CA_C	CA	C	0.0157412	0.00118294	-0.000241084	-1.24248e-05	-0.000100464	0.000493272	0.000295955	0.00184177	-0.000934431	8.20776e-05	-0.00103377	-2.52271e-05	0.00124049	0.00042677	4.6853e-05	0.00074695	0.000749019	0.000251467	0.00172451	0.00443617	0.00108046	0.0010534	0.00019795	0.340283	0.57214	0.790866	0.893008	0.51018	0.239233	0.285522	0.833169	0.939447	0.326415	0.898591
calcium-7:92258733_AAG_A	AAG	A	0.00205402	-9.30192e-05	-0.000603782	7.35569e-05	-0.000686518	-0.000152054	-5.10544e-05	-0.00117108	-0.00391922	-0.000260027	0.000271579	-0.000430725	0.000752121	0.000385502	3.86318e-05	0.000616657	0.000618476	0.000206617	0.00144681	0.00393851	0.000896627	0.000872565	0.000162348	0.901572	0.117298	0.0569051	0.265585	0.805797	0.804834	0.418274	0.319687	0.771812	0.755617	0.00797673
calcium-9:136149709_AC_A	AC	A	0.00512171	-0.00068197	-0.000397473	5.72972e-05	-0.000532864	-0.00074173	-0.000327005	0.000466127	-0.0071525	0.000813616	0.000661876	-0.000420016	0.00111524	0.00041473	4.50814e-05	0.000717898	0.000720142	0.000241453	0.00166081	0.00456433	0.00102582	0.00101772	0.000192183	0.540867	0.337867	0.203739	0.457934	0.303022	0.175635	0.77897	0.117106	0.4277	0.515467	0.0288541
calcium-9:140358556_C_T	C	T	0.00603442	-0.000232257	0.000363438	-9.47231e-05	-0.00155917	-0.00119202	0.000490091	-0.00170603	0.0029653	-0.00291859	-0.00186572	0.000343734	0.00255782	0.000549138	6.4997e-05	0.00103646	0.00103978	0.000348147	0.00242235	0.00627245	0.00150578	0.00147376	0.00027415	0.92765	0.508079	0.145022	0.1325	0.251625	0.159217	0.481256	0.636392	0.0525941	0.205529	0.20991
calcium-rs10004084	T	C	0.00425596	-0.00109805	8.41877e-05	5.49008e-05	0.000888167	0.000831973	-0.000294736	-0.000618212	-0.0044938	-0.000203186	0.00204269	3.43119e-06	0.00118385	0.000420319	4.62547e-05	0.000735917	0.000738568	0.000248752	0.00171494	0.00451783	0.00106672	0.00104083	0.000194015	0.353654	0.84125	0.235258	0.227478	0.259968	0.236074	0.718484	0.319892	0.848936	0.0496989	0.98589
calcium-rs10100534	G	A	0.00120243	-0.000925927	2.41195e-05	6.89479e-05	0.000167135	-0.000448297	0.000226821	-0.00029035	-0.00465464	0.00126782	0.00148202	-0.000125535	0.000691416	0.000384541	3.75985e-05	0.000599659	0.000601452	0.000201422	0.00140533	0.00367866	0.000864862	0.000848249	0.000159869	0.180515	0.949987	0.0666855	0.780462	0.456057	0.260127	0.836318	0.205763	0.142671	0.0806141	0.432317
calcium-rs10129874	C	T	0.00105626	0.0042998	-3.09096e-05	-2.80427e-05	5.20381e-05	-0.000613919	3.63721e-05	-0.0043731	0.00236096	-0.00158984	-0.00191063	-0.000231748	0.00116505	0.000416239	4.57313e-05	0.000728337	0.000730484	0.000244719	0.00171312	0.00471172	0.00105437	0.00103005	0.000195146	0.000223728	0.940804	0.539741	0.943041	0.400669	0.881847	0.0106897	0.616314	0.131594	0.0636151	0.235009
calcium-rs10153240	C	G	0.00189539	0.000710568	0.000445713	2.61117e-05	-0.000167856	0.000259518	-0.00029794	-0.000132819	-0.0075143	0.00103625	0.000739727	-1.73103e-05	0.000449191	0.000440412	3.42341e-05	0.000545664	0.000547366	0.000183279	0.00128165	0.00338486	0.00078933	0.000769769	0.000145512	0.113677	0.311521	0.445619	0.758373	0.635414	0.104035	0.917462	0.0264219	0.189243	0.336568	0.905307
calcium-rs10184715	A	T	0.00305876	-1.83683e-05	-6.3098e-05	6.72992e-05	0.000365207	-0.000243586	-0.000126645	-0.000780291	0.00567915	0.000192501	0.000353511	-0.000136434	0.000477335	0.000456328	3.581e-05	0.000571777	0.000573247	0.000191845	0.00132696	0.00351115	0.000828044	0.000809458	0.000152562	0.969304	0.890024	0.0601996	0.523004	0.670893	0.509165	0.556514	0.10578	0.816168	0.662311	0.371171
calcium-rs1042636	A	G	0.0107531	-0.00154075	0.00132953	0.000107509	-7.61761e-05	0.00137126	-0.000188483	0.00245747	-0.00425268	0.000531759	0.000389666	-0.00021582	0.00255875	0.000549129	6.42185e-05	0.00102461	0.00102851	0.000344868	0.00244941	0.00664089	0.00149339	0.00145387	0.000275549	0.547074	0.0154717	0.0941092	0.940735	0.18245	0.584698	0.315721	0.521928	0.721785	0.788685	0.433489
calcium-rs10444863	T	C	0.00225947	0.00215903	-0.00208663	3.22504e-05	0.000483684	0.00135811	0.000343878	-0.000609307	-0.00294829	0.000907339	0.000704663	0.00016276	0.000948269	0.000396781	4.19949e-05	0.000670665	0.000672901	0.000225692	0.0015514	0.00411592	0.000967699	0.0009471	0.000179909	0.0227983	1.45052e-07	0.442512	0.470788	0.0435615	0.127596	0.694507	0.473799	0.348438	0.456864	0.365639
calcium-rs10664325	AGTTTT	A	0.00308287	0.000606617	-0.000297299	-8.19076e-06	0.000438219	-0.000600196	-6.00154e-05	6.03369e-05	0.00125747	0.00103856	-9.7535e-05	-0.000214153	0.000637423	0.000389326	3.68565e-05	0.000588548	0.000590359	0.000197269	0.00136767	0.00356746	0.000852145	0.000829303	0.000157318	0.341265	0.445092	0.824132	0.456529	0.309316	0.760952	0.964811	0.724477	0.222935	0.906376	0.173428
calcium-rs10746732	A	G	0.00359082	0.00062176	0.000397854	3.95732e-05	0.00110146	0.00040698	0.000110269	0.00121291	-0.00160028	0.000494937	0.000323821	0.000185281	0.000914831	0.000398372	4.18569e-05	0.000666504	0.000668588	0.000224248	0.00157026	0.00413225	0.000969293	0.00094404	0.000177822	0.49673	0.317941	0.344436	0.0984145	0.542713	0.622912	0.439861	0.698559	0.609621	0.731586	0.297439
calcium-rs10754439	G	T	0.000441158	0.000442215	0.000601803	-6.52709e-05	-0.000287159	0.000377078	7.83848e-05	-0.000208024	-0.00304128	-0.00049902	-0.000368492	4.46628e-05	0.000508076	0.000405536	3.45997e-05	0.000552369	0.000554125	0.000185844	0.00129078	0.00345608	0.000799748	0.000781442	0.000147657	0.384097	0.137818	0.0592347	0.603156	0.496193	0.673188	0.871966	0.378872	0.532647	0.637246	0.76229
calcium-rs10807697	G	A	0.00113438	-0.000459492	0.000674202	-5.50862e-05	0.000519627	0.000400954	0.000117824	-0.000775538	0.0027682	-9.52838e-05	-7.42139e-05	-7.88097e-05	0.000474309	0.000418433	3.4038e-05	0.000543982	0.000545452	0.000182921	0.00126085	0.00332922	0.000784699	0.000767536	0.000145279	0.332666	0.107126	0.105583	0.339463	0.462287	0.519494	0.538495	0.4057	0.903353	0.922972	0.587495
calcium-rs10819178	G	T	0.00282683	-0.00220851	0.00148403	-3.33517e-05	-0.0010959	-0.000286191	7.22486e-05	0.000126192	0.00464136	-0.00121797	-0.000531462	3.01635e-05	0.00057769	0.000396946	3.58167e-05	0.000571721	0.000573353	0.000192178	0.00133494	0.00358052	0.000824282	0.000807482	0.000151589	0.000131874	0.000185073	0.351764	0.0552591	0.617673	0.706957	0.924688	0.194881	0.139514	0.510429	0.842277
calcium-rs10852764	C	G	0.00198704	0.000204306	-0.000258123	0.000121305	0.000187531	0.00128156	-0.000660961	0.00178238	0.012749	-0.00136708	-0.000582794	-0.000181886	0.00202635	0.000496748	5.76519e-05	0.000923602	0.000926235	0.000311242	0.00212049	0.00572571	0.00133508	0.00130512	0.000248443	0.91969	0.603326	0.0353712	0.839101	0.166477	0.033703	0.4006	0.0259734	0.305854	0.655204	0.464107
calcium-rs10886424	A	G	0.0025608	0.000177662	0.000467146	-1.38867e-06	-0.000233579	-0.000170327	5.56514e-05	-0.000896056	-0.00178807	-0.000916979	-0.000463427	1.75553e-05	0.000446685	0.000437702	3.38857e-05	0.000542382	0.000543982	0.000182149	0.00127226	0.003376	0.000784372	0.000767227	0.000144446	0.690825	0.285851	0.967311	0.666721	0.754196	0.759965	0.481244	0.59636	0.242381	0.545826	0.903267
calcium-rs10898820	A	G	0.00486707	-0.000368812	0.000271605	-4.25809e-05	2.86242e-05	0.00063777	-9.47557e-05	-0.00288391	-0.00515269	-0.000248472	-0.000310807	-5.48893e-05	0.000448645	0.00043825	3.40827e-05	0.000544012	0.000545351	0.00018294	0.00126123	0.00332396	0.000786904	0.000769338	0.000145099	0.411045	0.535423	0.211543	0.958037	0.242217	0.604486	0.0222216	0.121104	0.752186	0.686218	0.705217
calcium-rs10942734	A	C	0.00183315	-6.27536e-05	0.000387026	2.75983e-05	0.00183935	-0.000506524	-0.000126051	-0.000418031	0.00154278	-0.000394079	-3.9851e-07	6.25156e-05	0.000499163	0.00040923	3.45154e-05	0.00055064	0.000552212	0.000185097	0.00127875	0.00332367	0.000793309	0.000777255	0.000146989	0.899956	0.344281	0.423946	0.000836767	0.359006	0.495874	0.74374	0.642519	0.619363	0.999591	0.670614
calcium-rs10958700	T	G	0.00172884	-2.22511e-05	0.000160516	-4.06747e-05	0.000818357	-0.00119639	0.000440972	-0.00235761	0.00510112	-0.00214983	-0.000483889	-2.35545e-05	0.000828788	0.000393528	4.03157e-05	0.000643526	0.000645849	0.000216561	0.00149619	0.00417383	0.000926766	0.000904848	0.000172682	0.978581	0.683355	0.313021	0.203489	0.0639657	0.0417263	0.115086	0.221645	0.0203579	0.592807	0.891502
calcium-rs11078597	T	C	0.00894241	-0.000505258	0.000530075	-3.44951e-06	-0.00069228	0.000132356	3.98204e-05	-0.000113109	0.00470361	-0.000923353	-0.00138396	7.49312e-05	0.00103889	0.00040644	4.34346e-05	0.000694794	0.000696889	0.000233553	0.00163457	0.00447463	0.00100611	0.000984321	0.000183909	0.626722	0.19217	0.9367	0.319066	0.849369	0.864619	0.944832	0.29318	0.358753	0.159726	0.683689
calcium-rs11144001	C	T	0.00205128	0.000102557	-3.61599e-05	-5.89863e-06	2.81611e-05	0.00038794	0.00015446	0.00195963	8.6617e-05	0.000513757	0.000550782	9.06244e-05	0.000465339	0.000429477	3.43989e-05	0.000547536	0.000549296	0.000184303	0.00126432	0.00331924	0.000791749	0.000772715	0.00014668	0.825566	0.932901	0.863849	0.958981	0.480034	0.40199	0.121157	0.979181	0.516412	0.475978	0.536684
calcium-rs11172256	A	G	0.012953	1.61037e-06	-0.000389886	-3.40045e-05	0.000942661	9.94222e-05	-3.98252e-05	0.00056635	-0.000586764	0.000119787	0.00025107	-2.37831e-05	0.00077868	0.000386498	3.90819e-05	0.000624335	0.000625624	0.000209864	0.00146367	0.00382253	0.000907204	0.000882537	0.000165492	0.99835	0.313088	0.384256	0.131079	0.873735	0.849492	0.698803	0.878003	0.894953	0.776037	0.885729
calcium-rs111761261	C	T	0.00208271	-0.000433639	0.000604757	-3.79711e-05	0.000494647	0.000337086	0.000101818	0.000299638	-0.00378642	0.00141837	0.000370852	0.000179023	0.000572228	0.000425388	3.74185e-05	0.000596859	0.000598702	0.000200533	0.00139429	0.00371684	0.000865312	0.000841226	0.000160307	0.448567	0.155127	0.310218	0.407247	0.573416	0.611637	0.829843	0.308338	0.101185	0.659325	0.264103
calcium-rs112446754	G	A	0.00154403	0.00249917	0.00090773	-6.63268e-05	0.00140064	0.000560289	-0.000445568	0.00316526	0.00153468	0.00283057	0.00298587	7.21498e-05	0.00359348	0.000638799	7.67257e-05	0.00122446	0.00122828	0.000412958	0.0028502	0.00737866	0.00178154	0.00173083	0.000326996	0.486759	0.15532	0.387332	0.252672	0.648276	0.280604	0.266767	0.835238	0.112101	0.0845108	0.82537
calcium-rs112771035	C	G	0.00376112	-0.00342345	-0.00067801	-4.86229e-05	0.000654722	-0.000797524	0.000163932	0.00349978	-0.00426262	0.00175538	0.000560729	-0.000495025	0.00263103	0.000556468	6.566e-05	0.00104931	0.00105319	0.000352601	0.00249737	0.00664019	0.00149566	0.00146983	0.000281878	0.193197	0.223067	0.458983	0.532657	0.448902	0.641987	0.161099	0.520911	0.240538	0.702838	0.0790623
calcium-rs113120414	A	G	0.00387047	0.00193169	-0.000807982	1.03799e-05	-0.00151509	-0.00209396	-0.000634724	0.000307732	0.00205045	0.000889204	0.00204537	-5.88181e-05	0.00387209	0.000645114	7.77141e-05	0.00124317	0.00124643	0.000418043	0.00294185	0.00730416	0.00178394	0.00176275	0.000328604	0.617868	0.210403	0.893746	0.222947	0.0929651	0.128935	0.91669	0.778923	0.618168	0.245918	0.857943
calcium-rs113955164	G	A	0.00273167	-0.000805509	0.000151101	8.98491e-05	-8.18214e-05	0.000779569	3.02509e-05	-0.00192813	0.000582428	-0.00193796	-1.61782e-05	3.36578e-05	0.000967155	0.000404796	4.28877e-05	0.000683479	0.000685512	0.000229646	0.00159811	0.00432407	0.000988128	0.000961011	0.000181307	0.404922	0.708942	0.0361734	0.904711	0.255453	0.895199	0.227622	0.892854	0.0498531	0.986569	0.852727
calcium-rs113966327	C	A	0.00746369	-0.000641998	0.000196348	1.72691e-05	-0.000636426	0.000571325	-4.50948e-06	-0.00264133	-0.00446144	-0.000503195	-0.000449897	3.66067e-05	0.000594028	0.000402169	3.66171e-05	0.000585304	0.000587136	0.000197283	0.00137187	0.00366783	0.000846615	0.000827	0.00015545	0.279808	0.625394	0.637203	0.276887	0.330518	0.981764	0.0541868	0.223845	0.552272	0.586435	0.81383
calcium-rs11481757	A	AT	0.00987519	0.00170905	-0.00188319	-4.85861e-05	-0.000472081	2.8295e-05	0.00028484	0.00135165	0.00703572	-0.00120931	-0.00170277	-0.000184632	0.000812599	0.00040322	4.03673e-05	0.000646392	0.00064851	0.000217642	0.00152078	0.00406285	0.00093208	0.000908192	0.000172098	0.0354509	3.00834e-06	0.228746	0.465188	0.965199	0.190618	0.374121	0.0833252	0.194484	0.0608091	0.283348
calcium-rs114949263	T	C	0.00418975	0.00176676	0.000671892	1.34227e-05	-0.00123255	-0.000961037	8.94279e-05	-0.00222993	-0.00221089	-0.000257201	-6.10249e-05	-0.000712205	0.0017193	0.000471412	5.38556e-05	0.000863092	0.000866166	0.000289645	0.00200586	0.00542592	0.00125338	0.00122219	0.000232469	0.304136	0.154079	0.803179	0.153277	0.267203	0.757512	0.266265	0.683664	0.837411	0.960178	0.00218697
calcium-rs11629876	C	T	0.00190618	0.00202045	-0.00233121	2.1257e-05	-0.000665088	-3.27124e-05	-8.51791e-05	-0.00132952	0.000600408	-0.000648034	0.000114974	1.09043e-05	0.000609786	0.000384717	3.59758e-05	0.000574881	0.000576718	0.000193853	0.00135966	0.00359813	0.000831924	0.00081229	0.000152399	0.000921923	1.36709e-09	0.554609	0.247309	0.954767	0.660372	0.328158	0.867475	0.436006	0.887441	0.942959
calcium-rs11632520	C	T	0.00195803	0.00415685	-0.00262837	3.93352e-05	0.00143136	-5.68983e-05	-9.29819e-05	-0.000133578	-0.0132468	0.00165829	0.00146657	1.4979e-05	0.00115492	0.000415504	4.55335e-05	0.000726655	0.000728688	0.000244432	0.00169058	0.00450578	0.00105006	0.00102535	0.000195522	0.000319193	2.52523e-10	0.387658	0.0488631	0.937762	0.703649	0.937022	0.00328284	0.114285	0.152629	0.938934
calcium-rs11649482	A	G	0.0320125	0.00166808	0.000707965	-1.84621e-05	0.000103143	0.000345634	-0.000124832	-0.000527285	-0.0091649	-0.00137532	0.000316187	0.000249044	0.00103382	0.000406807	4.36022e-05	0.000696589	0.000699333	0.000234301	0.00161073	0.00429607	0.00100559	0.000980946	0.000185349	0.106637	0.0818082	0.671988	0.882289	0.621141	0.594183	0.743398	0.0328993	0.171417	0.747204	0.179064
calcium-rs11656104	A	T	0.00134096	-0.00014528	6.85939e-05	2.40473e-05	0.000262906	-0.00125597	-0.000243923	6.55149e-05	-0.00428698	0.000430983	0.000167376	0.000108389	0.000865485	0.00039765	4.11325e-05	0.000655957	0.000658181	0.000219648	0.00152548	0.00413429	0.000948613	0.000926796	0.000174955	0.866694	0.863046	0.558796	0.688569	0.0563608	0.266776	0.965744	0.299769	0.649592	0.856685	0.535573
calcium-rs11669932	A	G	0.00381687	-0.000172512	-0.000512459	1.07305e-05	0.000114044	-0.000335326	-3.28554e-05	-0.000567969	-0.00394223	0.00150611	-0.00106704	9.2896e-05	0.000489025	0.000417115	3.45348e-05	0.000551844	0.00055352	0.000185482	0.00129329	0.00349907	0.000799094	0.00077988	0.000147127	0.724263	0.219231	0.756017	0.836275	0.544643	0.859402	0.660542	0.259891	0.0594621	0.171246	0.527779
calcium-rs117039945	A	G	0.00505853	-0.000467637	-9.9232e-05	-0.000100384	-0.000262539	-0.0019748	-0.000174701	-0.00321871	-0.00529497	-0.00240108	-0.000733444	0.000524409	0.00227666	0.000518909	6.11327e-05	0.000973417	0.00097608	0.000325717	0.00228252	0.00594878	0.00140921	0.00137334	0.000260556	0.837256	0.848344	0.100577	0.787385	0.0430544	0.591712	0.158495	0.373416	0.0884115	0.593302	0.0441531
calcium-rs11746728	T	C	0.00348877	0.000157204	0.000603407	7.82219e-05	-0.0010681	-0.000654472	-0.000134244	8.7553e-05	-0.00327385	0.00109643	0.00117415	-0.000251637	0.000584478	0.000389153	3.57106e-05	0.000569903	0.000571555	0.000191375	0.00133721	0.00343734	0.000826222	0.000805161	0.000152981	0.787957	0.121007	0.0284936	0.0609061	0.252181	0.483009	0.947796	0.340876	0.184499	0.144764	0.0999942
calcium-rs117942921	G	C	0.00392956	-0.00312008	-0.000475272	2.93355e-05	9.85547e-05	0.000154033	0.000269591	-0.00124238	-0.0200957	0.000523413	0.00163845	0.000477014	0.00328828	0.000612293	7.30617e-05	0.00117012	0.00117327	0.000391265	0.00269294	0.00702561	0.00169032	0.00164272	0.000310809	0.342699	0.437622	0.68804	0.932877	0.89555	0.490809	0.644549	0.00423212	0.756825	0.318572	0.124847
calcium-rs11826742	C	G	0.00191391	0.000694835	-9.54135e-05	9.71725e-05	0.000956066	0.000631768	0.000480937	-0.00070968	-0.00114391	-0.000400719	0.000196578	-9.31268e-05	0.00130594	0.000430808	4.80295e-05	0.000765559	0.000767695	0.000257927	0.00178586	0.00455303	0.00110063	0.00108132	0.000202879	0.594686	0.824723	0.0430557	0.211723	0.410542	0.0622352	0.691082	0.801628	0.715797	0.855743	0.646215
calcium-rs1187117	T	G	0.0242271	0.000363584	0.000166409	-0.000200163	0.000959618	-0.000896084	0.000543294	-0.00292406	-0.00557285	-0.00359906	-0.00236918	-0.000255341	0.00110168	0.000412528	4.46133e-05	0.000712802	0.000714663	0.000240231	0.00167348	0.0045647	0.00103182	0.00100759	0.000187833	0.74138	0.686663	7.23964e-06	0.17822	0.209896	0.0237265	0.0805877	0.222141	0.000486659	0.0187083	0.174022
calcium-rs12005133	T	C	0.0016053	0.00151802	-0.00168604	3.1822e-06	0.000364997	1.22903e-05	-0.000145211	0.000143736	-0.00114994	-0.00152219	0.00044517	4.68213e-05	0.000664515	0.000387512	3.70879e-05	0.000592132	0.000593873	0.000198978	0.00137374	0.00360066	0.000852417	0.0008339	0.000157172	0.0223486	1.35619e-05	0.931624	0.537623	0.983489	0.465522	0.916669	0.749447	0.0741438	0.593452	0.765781
calcium-rs12131135	T	G	0.0536359	0.00121652	8.02789e-05	-3.76694e-05	-5.13789e-05	-0.000256314	-2.89658e-06	0.0026492	0.000252338	0.000635568	-0.000584619	-0.00013883	0.000451211	0.000440449	3.42368e-05	0.000547123	0.000548672	0.000183708	0.00127194	0.00336765	0.000792819	0.000773811	0.000145714	0.00701561	0.855374	0.27122	0.925183	0.640391	0.98742	0.0372699	0.940271	0.422754	0.449947	0.340717
calcium-rs12214917	C	T	0.00225203	-0.00074909	-0.000152551	6.05564e-05	-0.000178234	-8.68399e-05	0.000149132	0.00106867	-0.00171987	0.000788834	-0.000916418	0.000162694	0.000471438	0.000443287	3.50324e-05	0.000560128	0.000561846	0.000188279	0.00129467	0.00337095	0.000810804	0.000789545	0.000150569	0.112074	0.730744	0.0838855	0.750332	0.877167	0.428315	0.409124	0.609909	0.330603	0.24577	0.27991
calcium-rs12339541	C	A	0.00214682	0.00138386	-0.000803682	0.000154414	-0.000885204	-0.000360114	-1.72945e-05	0.00179309	0.00440363	-0.00426346	8.76216e-05	9.13709e-05	0.00301768	0.00058387	7.00724e-05	0.00111163	0.0011154	0.000374273	0.00262202	0.0068776	0.00162141	0.00157817	0.0002994	0.646533	0.168676	0.0275507	0.425852	0.746804	0.963144	0.494065	0.521987	0.00855253	0.955724	0.760229
calcium-rs12378991	G	A	0.00254642	-0.00156223	-0.00032686	3.2124e-07	-0.000442845	0.00124588	-0.000590364	-0.00346659	0.00577219	0.00323984	0.000888018	-0.000412173	0.00247253	0.000535879	6.32235e-05	0.0010107	0.00101351	0.000340327	0.00236002	0.00644843	0.00145236	0.00141456	0.000267631	0.527497	0.541895	0.995946	0.661273	0.218972	0.082796	0.141867	0.370717	0.0256999	0.530156	0.123543
calcium-rs12485356	T	C	0.207183	0.0012135	4.3469e-05	1.96165e-06	-0.000258851	0.000537628	-0.000130854	-6.67397e-05	0.000190855	0.000379627	-0.000557427	0.000163434	0.000726662	0.000385258	3.81329e-05	0.00060947	0.000611271	0.000204472	0.00140836	0.00374853	0.000881205	0.000857367	0.000161827	0.094928	0.910165	0.958973	0.671044	0.379117	0.522201	0.962204	0.959394	0.666611	0.515589	0.312532
calcium-rs12583851	C	T	0.00244813	-0.00281224	0.00201291	-1.79107e-05	0.00163298	-0.000172165	8.53663e-05	0.00176942	0.00035787	0.000487763	-0.000636295	0.000156466	0.000795448	0.000386137	3.94835e-05	0.000628075	0.00063006	0.000211549	0.0014651	0.00381942	0.000905637	0.00088582	0.000166182	0.000407213	1.86039e-07	0.6501	0.00932374	0.78466	0.686559	0.22716	0.92535	0.590173	0.472567	0.346432
calcium-rs12592697	C	T	0.000789402	-0.00227568	0.00235149	9.82557e-06	-0.00129943	7.38889e-05	-0.000383768	-0.000465973	-0.00332175	-0.000149121	-0.000437623	0.000190922	0.000581957	0.000387572	3.55361e-05	0.000568043	0.000569745	0.000191243	0.00132486	0.00343913	0.000820481	0.000801282	0.000151529	9.2176e-05	1.30344e-09	0.782168	0.0221644	0.896814	0.0447828	0.725052	0.33411	0.855781	0.584962	0.207682
calcium-rs1260326	C	T	0.00593735	-0.00103669	0.000497231	-4.0288e-05	-0.000174436	0.000159442	0.000388491	-0.00114351	-0.00677345	5.75934e-05	-0.000327061	-5.02735e-06	0.000529821	0.000398926	3.47213e-05	0.000554106	0.000555757	0.000186224	0.00130541	0.00340562	0.000798906	0.000783971	0.000148652	0.0503857	0.21261	0.245917	0.752908	0.774196	0.0369668	0.381042	0.0467134	0.94253	0.676544	0.973021
calcium-rs12613807	T	C	0.00993616	-0.000274326	0.000564818	-5.97699e-05	-7.07296e-05	4.06876e-05	9.35402e-05	0.00188537	0.000932005	-0.000612237	-5.24085e-05	-0.000224207	0.000481815	0.000414352	3.42212e-05	0.000545919	0.000547489	0.000183811	0.00127801	0.00340395	0.000792041	0.00077365	0.000144847	0.569113	0.172841	0.0807123	0.896914	0.940758	0.610827	0.140149	0.784238	0.439532	0.945991	0.121652
calcium-rs1262217	A	G	0.0115919	0.000701458	0.000443445	-3.47605e-05	-0.000329752	0.00116973	0.00016482	-0.00175625	-0.00167332	-0.0017461	0.000716859	5.55592e-05	0.00112117	0.000411222	4.49115e-05	0.000715663	0.000718119	0.00024102	0.00166767	0.00434459	0.00103336	0.00101509	0.000193148	0.531548	0.280874	0.438945	0.644968	0.10334	0.494074	0.292289	0.700127	0.09108	0.480064	0.773615
calcium-rs12800995	A	G	0.0165309	-0.000934542	0.000706101	3.63287e-05	-0.000270596	-0.000117764	-0.000124042	0.000774337	-0.00771167	5.9387e-05	-0.00117633	0.000159152	0.000552768	0.000394899	3.52136e-05	0.000560819	0.000562354	0.000188994	0.00130345	0.00349311	0.000808576	0.000790164	0.000149815	0.0909033	0.0737683	0.302229	0.629451	0.834127	0.511614	0.552468	0.0272678	0.941451	0.136565	0.288091
calcium-rs12918968	A	C	0.00198493	0.000250785	-0.000860519	-2.62123e-05	0.000761669	0.000393503	-9.04528e-05	0.00144904	0.00198475	-0.000157422	-0.00024784	-6.27175e-05	0.000487921	0.000414883	3.4362e-05	0.000548424	0.000550081	0.00018421	0.0012923	0.0034909	0.00079638	0.000775033	0.00014629	0.607261	0.0380687	0.445567	0.164885	0.474391	0.623405	0.262167	0.569663	0.843302	0.749135	0.668127
calcium-rs12922549	C	T	0.00238948	0.000444024	-0.000556802	4.9721e-05	-0.000722946	-0.000696906	-0.000293321	0.00107425	-0.00351981	-0.000167346	0.00041314	-0.000200318	0.000889467	0.000400303	4.16325e-05	0.000664127	0.000666239	0.000223205	0.00156546	0.00420506	0.000965059	0.000944161	0.000179216	0.617637	0.164242	0.232368	0.276347	0.295548	0.188802	0.492577	0.40257	0.862333	0.661696	0.263676
calcium-rs12983362	C	G	0.239305	-7.49591e-05	3.52708e-05	3.40546e-05	-0.000393698	0.00127525	2.07329e-05	0.00145968	-0.00136167	0.000689652	0.00173252	0.000191566	0.000807269	0.000399795	4.05783e-05	0.000646115	0.000648092	0.000217865	0.001513	0.00390892	0.000938002	0.000914081	0.000172813	0.926019	0.9297	0.40134	0.542305	0.0491048	0.924185	0.334668	0.727578	0.462198	0.0580463	0.267642
calcium-rs13100474	G	A	0.00255914	0.00129832	0.000522379	-1.77188e-05	-0.000390571	5.35554e-05	-0.000139929	-0.0018259	-0.00242798	0.000429193	0.00148377	0.000232119	0.000962279	0.000400773	4.22902e-05	0.000675894	0.000678101	0.000227803	0.00158408	0.00428717	0.00097607	0.00095202	0.000178852	0.17727	0.19243	0.675231	0.56336	0.93705	0.539049	0.249054	0.571166	0.660144	0.119104	0.194349
calcium-rs13107325	C	T	0.00390766	0.0080774	-0.000546782	3.42113e-05	0.000899443	0.00209801	-0.000493028	-0.0022558	-0.00248917	0.000752515	0.00115576	0.00023736	0.00261615	0.000547109	6.48951e-05	0.00103293	0.00103729	0.000347666	0.00233152	0.00650482	0.00150689	0.00147912	0.000273327	0.0020186	0.317601	0.59807	0.383883	0.0431181	0.15616	0.333284	0.701968	0.617511	0.434577	0.385173
calcium-rs13108218	G	A	0.0027134	0.000301393	-0.000539069	-1.53512e-06	0.000730207	0.000824567	-1.69987e-06	0.00113983	0.00479222	0.00103654	-0.00115768	-0.000280018	0.000555962	0.000402151	3.56837e-05	0.000568489	0.000570068	0.000190565	0.00132448	0.00350451	0.000817581	0.000800653	0.000152145	0.587742	0.180095	0.965686	0.198979	0.148057	0.992883	0.389465	0.171488	0.204866	0.148203	0.0657023
calcium-rs13284665	A	G	0.00122363	0.000194876	0.000399924	-1.1771e-05	-0.000521299	-0.00140564	0.000703614	0.00237481	-0.000686916	-0.00125267	-0.00101533	-0.000121628	0.00145448	0.000444488	5.01045e-05	0.000800762	0.000803359	0.000269402	0.00184314	0.00483713	0.00115899	0.00112843	0.000213254	0.893416	0.36826	0.814265	0.515045	0.0801719	0.00900837	0.197587	0.887073	0.279774	0.368242	0.568445
calcium-rs13391049	G	A	0.0317192	0.0011311	-0.000613663	3.4145e-05	-8.36658e-05	3.74474e-05	0.00020516	0.00111832	0.00443597	-0.000488642	0.000193151	0.000122842	0.000598372	0.000388522	3.59588e-05	0.000574504	0.000576238	0.000193128	0.00133916	0.00346913	0.000829867	0.000810694	0.000151813	0.058719	0.114228	0.342337	0.884212	0.948185	0.2881	0.403667	0.201005	0.555984	0.811685	0.418422
calcium-rs13396921	A	C	0.00553051	-0.00044306	-0.000547504	2.54246e-05	0.000647839	7.31206e-05	8.98505e-05	-0.00118999	-0.00405242	-0.000594365	-0.00122971	0.000108317	0.000822349	0.000475396	4.59924e-05	0.000734116	0.000736072	0.000246217	0.00172847	0.0045746	0.00105806	0.0010328	0.000193211	0.590044	0.249454	0.580401	0.377521	0.920869	0.715169	0.491161	0.375698	0.574286	0.233791	0.575059
calcium-rs141952264	A	AAAAC	0.00490014	0.000344347	-0.000278083	8.80005e-05	-0.000465665	-4.3245e-06	0.000144655	-0.000237636	0.00230254	0.00103435	0.000512913	-0.000137098	0.000588021	0.000389153	3.56993e-05	0.000570805	0.000572727	0.000192138	0.00132592	0.00351594	0.000825872	0.000807451	0.000153459	0.558143	0.474866	0.0137001	0.414613	0.993975	0.45153	0.857763	0.512542	0.210413	0.525283	0.371654
calcium-rs142385484	C	T	0.156206	0.00277685	-0.000433044	3.83005e-05	0.000248459	0.000536561	-0.000143743	0.00236673	-0.00201668	0.000166557	-0.00048404	-0.000305171	0.0013926	0.000442289	4.95221e-05	0.000790578	0.000792965	0.000266312	0.00186547	0.00494585	0.00115379	0.0011173	0.000211235	0.0461534	0.327533	0.439285	0.753312	0.498628	0.589366	0.204548	0.683457	0.88522	0.664853	0.148545
calcium-rs149131600	C	T	0.00464486	2.22109e-07	-0.000213792	5.33707e-05	-0.000539073	-7.6341e-06	0.00033701	0.000523304	0.00469877	-0.000709542	-0.000561047	9.90267e-05	0.00111521	0.00041226	4.46148e-05	0.000713522	0.000715604	0.000239878	0.00168456	0.00448289	0.00103162	0.00100943	0.00019021	0.999841	0.60405	0.231598	0.449944	0.991488	0.160046	0.756069	0.294568	0.491584	0.578344	0.602635
calcium-rs149727843	TCAA	T	0.0046854	-0.000312324	0.000377459	-3.74788e-05	0.00025418	-0.000671891	8.44459e-05	-0.000710785	0.00414634	-0.000852954	-0.00127487	-0.000177946	0.000532562	0.00040955	3.55191e-05	0.000566554	0.000568265	0.00019043	0.00132828	0.00345152	0.000821682	0.000801392	0.000150941	0.55757	0.356717	0.291347	0.65369	0.237067	0.657443	0.59257	0.229633	0.299245	0.111654	0.238435
calcium-rs1497826	C	G	0.00311207	-0.000442187	0.000420132	-5.62291e-07	0.000734531	-0.000396453	-1.27123e-05	0.000223338	2.23096e-05	0.000202929	0.000592207	-3.15765e-05	0.000560803	0.000396835	3.55023e-05	0.000567426	0.000569361	0.000190843	0.00132199	0.00355861	0.000820624	0.000800972	0.000152458	0.430412	0.289734	0.987364	0.195495	0.486234	0.946891	0.865844	0.994998	0.804687	0.45969	0.83592
calcium-rs151038334	C	T	0.00437004	0.00356342	-3.37511e-05	3.3204e-05	-0.000177369	0.000298918	-0.000265638	0.00410601	0.00700611	-0.00120765	0.00135143	4.24197e-05	0.00254746	0.000548512	6.48877e-05	0.00103216	0.00103566	0.000346818	0.00242231	0.00636731	0.00150126	0.00145734	0.000278122	0.16187	0.950935	0.608851	0.863561	0.772867	0.44372	0.0900613	0.271192	0.421153	0.353759	0.878776
calcium-rs16844401	G	A	8.33405e-05	0.00430841	-0.00115476	-3.60379e-05	0.000377365	0.000900069	1.02247e-05	-0.000394439	0.00448066	0.00052235	-0.00146726	-0.000528269	0.00294708	0.000578226	6.87274e-05	0.00109711	0.0011002	0.000370832	0.00255985	0.00688133	0.00158697	0.00154585	0.000292216	0.143763	0.0458184	0.600029	0.730875	0.413304	0.978003	0.877541	0.514961	0.742043	0.34254	0.0706397
calcium-rs17199211	C	T	0.0179693	-0.00309225	0.000996157	-1.08164e-05	0.000500983	0.000109613	2.62998e-05	0.000819178	0.00189936	0.00215069	9.51504e-05	5.06397e-05	0.000700849	0.000383197	3.76852e-05	0.000600273	0.000601946	0.000202079	0.00141283	0.0037981	0.000870362	0.000850842	0.000161411	1.02396e-05	0.009334	0.774097	0.403949	0.855506	0.896451	0.56204	0.617017	0.0134738	0.910958	0.753726
calcium-rs1729662	A	G	0.00164904	-0.000200877	0.000429073	2.57363e-05	9.81034e-05	0.000132223	4.37665e-05	-0.00169146	-0.00253284	0.00102776	0.0004674	3.52515e-05	0.000486898	0.000413187	3.43139e-05	0.000547035	0.00054883	0.000183754	0.00126989	0.00331859	0.00079153	0.000771582	0.000145825	0.679925	0.299064	0.453239	0.857674	0.809619	0.811742	0.182869	0.445327	0.194136	0.54467	0.808983
calcium-rs17486892	T	C	0.04893	-0.00171277	0.000821267	9.66245e-05	-0.000574309	-0.00032811	-0.00022826	0.000457076	0.00618756	-0.000595209	0.000158388	0.000193315	0.000938003	0.000401238	4.2042e-05	0.000671169	0.000673434	0.000225298	0.0015453	0.00390975	0.000969878	0.000949172	0.000179995	0.0678561	0.0406759	0.0215464	0.392174	0.626103	0.310993	0.767395	0.113515	0.539418	0.867473	0.282825
calcium-rs1749849	C	T	0.0509138	-0.00068119	-0.000130712	4.03856e-05	-0.000995784	-0.000122238	-0.000396981	0.000304867	0.00470275	0.000845604	-6.72363e-05	7.35087e-05	0.000509984	0.000409669	3.48735e-05	0.000556345	0.000557762	0.00018726	0.00130144	0.00346137	0.000806111	0.000785975	0.000148393	0.181646	0.749675	0.24684	0.0734766	0.826527	0.0340114	0.814788	0.174262	0.294184	0.931828	0.620343
calcium-rs1763519	C	G	0.00157242	-2.4144e-05	0.000437146	6.29205e-06	-0.000288701	-0.000738037	-8.29309e-05	-0.00043307	0.000768096	-0.000615463	-0.000635082	5.49906e-05	0.000529792	0.000397706	3.47649e-05	0.000554914	0.000556605	0.00018647	0.00130357	0.00334419	0.000804658	0.000786117	0.000146846	0.963651	0.271696	0.856377	0.60288	0.184854	0.656507	0.739724	0.81834	0.444347	0.419166	0.708049
calcium-rs1801282	C	G	0.00148272	0.000606335	0.000179564	5.57886e-05	-0.000410101	0.000258604	-0.00030462	-0.000244671	-0.0121388	-0.000183454	-6.14632e-06	2.65283e-05	0.00158471	0.000458998	5.22847e-05	0.000831746	0.000834242	0.000279355	0.00201274	0.00532859	0.00121036	0.0011804	0.000220988	0.702006	0.695643	0.285965	0.621971	0.756571	0.275521	0.903247	0.0227243	0.879526	0.995845	0.904449
calcium-rs1858800	C	T	0.00512901	7.53101e-05	0.000631646	2.82068e-05	0.00121931	0.00135	0.000391137	0.000984086	0.000897185	0.0011891	0.000331351	0.000215233	0.000599623	0.000391439	3.62003e-05	0.000576779	0.000578302	0.000193994	0.00133706	0.00354159	0.000833353	0.00081505	0.000153508	0.900052	0.106604	0.43587	0.0345169	0.0195745	0.0437769	0.461729	0.800015	0.153613	0.684346	0.16089
calcium-rs190424317	C	G	0.00454891	-0.000593694	4.47157e-05	2.17576e-06	-0.000171738	-0.00131353	0.000212376	-0.0039152	0.00107842	-0.000247404	0.000958833	-5.67203e-05	0.00226234	0.000545574	6.35202e-05	0.00101319	0.001016	0.000341133	0.00237055	0.0063507	0.00145849	0.00143191	0.000266555	0.792994	0.934678	0.972675	0.865403	0.196067	0.533574	0.098618	0.865159	0.865301	0.503102	0.831491
calcium-rs200358011	T	TA	0.0132264	1.47812e-05	-0.0008296	-0.000103324	0.000170818	0.000245812	3.87907e-05	-0.00148862	0.00353085	-0.00017753	0.00054901	-0.000382607	0.00129997	0.000430949	4.77112e-05	0.000763086	0.00076469	0.00025667	0.0017949	0.0046263	0.00110477	0.00107693	0.000203707	0.990928	0.0542241	0.0303421	0.822873	0.747867	0.879873	0.406901	0.445338	0.872334	0.610198	0.0603536
calcium-rs200995551	G	A	0.00366688	0.000413783	-0.000536565	6.23505e-05	-0.000781509	-0.000508951	-0.000342325	-0.00055385	-0.00177231	-7.05301e-06	-0.0012758	-0.000278875	0.000707424	0.0004499	4.20179e-05	0.00066946	0.000671779	0.000225099	0.00155808	0.00412924	0.000967823	0.000949685	0.000178697	0.558605	0.233016	0.137836	0.243062	0.448682	0.128317	0.722238	0.667771	0.994185	0.179147	0.118621
calcium-rs2182761	T	C	0.00104516	0.000465613	2.25834e-05	-1.48871e-05	-0.000313035	-0.000225937	0.000110232	-0.00195803	-0.000260695	-0.000691736	-0.000433555	0.000146881	0.000596287	0.000394479	3.64077e-05	0.00057913	0.000580803	0.000194924	0.00134397	0.00353412	0.000838648	0.000818186	0.000154755	0.43489	0.954347	0.682613	0.588835	0.697271	0.571726	0.145143	0.941197	0.409473	0.596183	0.342559
calcium-rs218671	T	G	0.00295048	-0.00059167	-0.000229591	-1.29552e-05	-5.37369e-05	-0.000227338	-0.000277125	-0.00141761	0.00197911	5.24562e-05	0.000156483	-7.74315e-05	0.000480967	0.000423581	3.4527e-05	0.000552202	0.000553955	0.000185747	0.00129114	0.0033913	0.00079946	0.00078024	0.00014642	0.218636	0.587803	0.707497	0.922477	0.68152	0.135713	0.272226	0.5595	0.947685	0.841045	0.596923
calcium-rs2197563	A	G	0.000647351	0.000189706	0.000378735	1.00159e-05	0.00074475	-0.000757183	7.10123e-05	0.000673268	-0.00202121	0.000894001	-0.000199336	-5.4283e-05	0.000520301	0.000401545	3.47583e-05	0.000554267	0.000556138	0.000186372	0.00128702	0.00345891	0.000801656	0.000782845	0.000146329	0.715404	0.345583	0.773225	0.179057	0.173357	0.703186	0.600889	0.558985	0.264769	0.799009	0.710664
calcium-rs2271494	A	T	0.00384365	0.000985752	0.000714583	-1.84255e-05	0.00109269	-6.1493e-05	4.33016e-05	0.000709187	0.00253208	-0.000544745	-0.000627439	3.52152e-05	0.000508459	0.000405185	3.46111e-05	0.000552311	0.00055382	0.000185313	0.00129137	0.00338467	0.000799852	0.000779852	0.000147323	0.0525386	0.0778009	0.594478	0.0478861	0.911589	0.815244	0.582886	0.454399	0.495836	0.421074	0.81108
calcium-rs2283038	C	T	0.00133899	6.72566e-05	-0.000344793	-7.88598e-05	-0.00106588	0.00114118	-7.2517e-05	0.00085036	0.000274025	0.000330538	0.000150821	0.000223418	0.000840505	0.000390629	4.0303e-05	0.000642434	0.000644172	0.000216267	0.00150746	0.00395744	0.000922029	0.000903392	0.0001699	0.936222	0.377421	0.0503872	0.0970925	0.0764721	0.73739	0.572687	0.944796	0.719977	0.86741	0.188514
calcium-rs2370218	T	G	0.00143783	-0.000850501	-6.08007e-05	-3.65096e-05	-2.87781e-05	0.000347855	-6.59075e-05	-0.00167027	0.00121575	-0.000468568	0.00106328	-0.000278208	0.000855161	0.000391268	4.05063e-05	0.000646192	0.000648137	0.00021762	0.00151218	0.00397913	0.000935326	0.000912993	0.000172635	0.319956	0.876511	0.367414	0.964478	0.591476	0.762	0.269357	0.759962	0.616395	0.24418	0.107067
calcium-rs2388993	G	T	0.00137297	-4.8415e-05	0.000677068	-4.5748e-05	-0.00031851	-0.000221497	3.9343e-05	-0.00155026	-0.00600919	-0.00129121	-0.00170069	-0.000140334	0.000509398	0.00040294	3.44914e-05	0.000550823	0.000552374	0.00018509	0.00129296	0.00335668	0.000797587	0.000777122	0.000146076	0.92428	0.0928966	0.184721	0.5631	0.688427	0.83167	0.230529	0.0734198	0.105471	0.0286391	0.336707
calcium-rs2419886	C	T	0.00146934	0.00127984	-7.9565e-05	-3.92299e-05	-0.000681582	-0.0011418	-5.29403e-05	-0.00196652	0.00204617	0.000119433	-0.000585973	-0.000198889	0.000780396	0.000387512	3.92135e-05	0.000625456	0.000627516	0.000210776	0.00146547	0.00387605	0.000902494	0.000883315	0.000167723	0.10101	0.83732	0.31711	0.275831	0.0688273	0.801684	0.179627	0.597568	0.894719	0.507089	0.235697
calcium-rs2425431	G	A	0.00251479	-0.00130383	0.000468883	5.22988e-06	-0.000488872	-0.00130248	-0.000572435	0.000518461	-0.00438084	0.000668317	-0.000241457	-4.22665e-05	0.00047861	0.000416425	3.42637e-05	0.000546185	0.000548034	0.000184028	0.00127138	0.00338141	0.000792399	0.000773909	0.000146499	0.00644624	0.260178	0.878685	0.370752	0.0174719	0.0018674	0.683426	0.195126	0.399	0.755043	0.772956
calcium-rs2498328	C	G	0.00666359	5.29374e-05	0.000478517	1.58685e-05	-0.000894228	1.4651e-05	-3.03306e-05	-0.000503395	-0.00678479	-0.000661381	-0.000817687	-7.24652e-05	0.000965984	0.00040015	4.23502e-05	0.000676112	0.000677885	0.000227708	0.00157389	0.00420223	0.000977328	0.000954619	0.000178868	0.956297	0.231759	0.707886	0.185969	0.982757	0.894036	0.749088	0.106405	0.498582	0.391691	0.685381
calcium-rs2509671	C	A	0.00209762	-0.000677841	0.000458853	1.84607e-05	0.000593939	0.000138445	0.000343997	0.00194826	0.0101508	-0.000507751	-0.000949653	0.000192276	0.00067678	0.000383066	3.72369e-05	0.000594147	0.00059585	0.000199328	0.00139248	0.00378039	0.000861182	0.000838146	0.00015824	0.316553	0.230979	0.620062	0.317481	0.816267	0.0843879	0.161776	0.00725096	0.555461	0.257199	0.224334
calcium-rs267738	T	G	0.0164186	-0.000300733	0.00048842	-6.21705e-05	0.000258005	0.000487611	0.000513242	0.00195202	0.00227725	0.00108536	-0.00122036	0.000114406	0.000895686	0.000392825	4.10051e-05	0.000655636	0.000657896	0.000220899	0.00153942	0.00417079	0.000947932	0.000924043	0.000172133	0.737054	0.213739	0.129478	0.693937	0.458593	0.0201574	0.204789	0.585066	0.252221	0.186612	0.506283
calcium-rs2717600	G	A	0.0076213	-0.000417288	0.000239326	-4.74249e-05	-0.00035159	-0.000108014	0.000160619	-0.000997311	-0.00320543	-0.000935379	-0.000940757	4.97361e-06	0.000471423	0.000421521	3.41584e-05	0.00054568	0.000547178	0.000183259	0.00126932	0.00340203	0.000789986	0.000768921	0.00014483	0.376068	0.570193	0.165022	0.519372	0.843513	0.380782	0.432041	0.346085	0.236398	0.221152	0.972605
calcium-rs2736887	G	C	0.00774912	-0.000968065	0.000462396	-7.03627e-05	-0.00166382	-0.000313571	0.000367679	0.00119538	0.000101701	-0.000401986	-0.00118652	-0.000106115	0.000932885	0.000396818	4.17297e-05	0.000667218	0.00066934	0.000224533	0.00156752	0.00410991	0.00096773	0.00094407	0.000177357	0.299406	0.243916	0.0917675	0.0126439	0.639444	0.101521	0.445708	0.980258	0.677856	0.208824	0.549631
calcium-rs2762943	G	T	0.00472377	-0.00030362	-0.000464405	4.87718e-05	-0.00119606	-0.000901961	0.000172935	0.000872383	-0.0113185	0.000727073	0.00101193	0.000152097	0.00248042	0.000541265	6.36729e-05	0.00101819	0.00102203	0.000343209	0.00235346	0.00624102	0.00148111	0.00144149	0.000273521	0.902577	0.390893	0.443692	0.240119	0.377496	0.614348	0.710875	0.0697461	0.623499	0.48268	0.578163
calcium-rs2847381	C	T	0.0035292	0.000402836	0.00045487	-2.79991e-05	0.000889368	0.00176248	-7.46768e-06	-0.00185264	0.0111919	0.000158207	0.000770446	-5.64327e-05	0.00104208	0.000404611	4.35807e-05	0.000695712	0.000697526	0.000234045	0.00161395	0.00435559	0.0010021	0.000980341	0.000186317	0.699076	0.260922	0.520572	0.201125	0.0115128	0.974546	0.251013	0.0101841	0.874555	0.43193	0.761978
calcium-rs2856694	T	C	0.00161071	0.000603789	0.000309959	9.46219e-05	-8.35121e-05	0.000345209	0.000163633	0.00368485	0.00574884	0.000434153	0.00191094	0.000190316	0.0012576	0.000449015	4.9318e-05	0.000784768	0.000787051	0.000263868	0.00173363	0.00390585	0.00113677	0.00110914	0.000210101	0.631148	0.490001	0.0550354	0.915252	0.660944	0.535172	0.0335449	0.141062	0.702524	0.0849089	0.365026
calcium-rs28601761	C	G	0.00119198	0.000105384	-0.000147838	2.86353e-05	-9.78235e-06	-0.000446084	-0.000426428	0.00229977	-0.00286023	0.00207435	0.000816665	0.000234398	0.000516542	0.000413061	3.52133e-05	0.000562018	0.000563459	0.000188997	0.00131285	0.00351555	0.000815513	0.000792998	0.000149342	0.838339	0.720412	0.416107	0.986113	0.428544	0.0240547	0.0798211	0.415877	0.0109722	0.303085	0.116526
calcium-rs296849	T	A	0.00352697	-0.00046377	0.000440625	2.34992e-05	0.000366641	-0.000172081	3.91097e-05	-0.000112413	-0.00204564	0.000204216	0.000536614	-7.93937e-05	0.000452531	0.000439666	3.43509e-05	0.000547273	0.00054899	0.000183865	0.00127681	0.0034146	0.000791491	0.00077353	0.000145178	0.305441	0.316257	0.493918	0.502896	0.753939	0.831554	0.929843	0.549116	0.796396	0.487858	0.584469
calcium-rs2968864	T	C	0.000839475	0.000330577	0.000193552	3.96484e-05	-0.000902801	-0.000337286	-0.00020871	0.000405081	0.000564508	0.00010755	0.000931217	0.000348045	0.0007928	0.000386006	3.91859e-05	0.000626769	0.000629019	0.000210825	0.00148537	0.00396555	0.00090762	0.000886194	0.000166666	0.676697	0.616074	0.311634	0.149754	0.591814	0.322189	0.785073	0.886801	0.905674	0.29335	0.0367743
calcium-rs3011	G	C	0.00384169	-1.66974e-05	-3.28894e-05	2.70072e-05	0.000572377	-0.000463617	0.000168689	-0.00175471	-0.00711562	-0.000246599	0.00113523	0.000241919	0.000566338	0.000393571	3.55091e-05	0.000567295	0.000568923	0.000190634	0.00132815	0.00351563	0.000821021	0.000803087	0.000151676	0.976479	0.933401	0.446914	0.312996	0.415129	0.37622	0.186445	0.0429716	0.763906	0.157487	0.110722
calcium-rs302650	G	A	0.00270509	0.000216276	0.00011193	-2.42284e-05	0.000395204	-0.000396747	-4.79553e-05	-0.0019354	-0.0083448	0.000537441	-0.00100083	3.36763e-05	0.000489879	0.00040993	3.4277e-05	0.000546507	0.000548034	0.000183487	0.0012673	0.00331804	0.000788136	0.000771022	0.000145876	0.65886	0.784817	0.479666	0.469591	0.4691	0.793819	0.126718	0.0119045	0.495294	0.194271	0.817427
calcium-rs308049	C	T	0.00781888	-0.000549494	-0.000375079	2.89902e-05	5.61276e-05	0.000105002	0.000343659	3.78037e-05	-0.000170847	0.000806836	-0.000544035	6.95437e-05	0.00068458	0.000389249	3.7632e-05	0.000600875	0.000602517	0.000201734	0.00139106	0.00363648	0.000867701	0.000848805	0.000160858	0.422165	0.335249	0.441086	0.925578	0.861652	0.0884713	0.978319	0.962528	0.352448	0.521561	0.665503
calcium-rs329926	G	A	0.00215959	-0.000561747	0.000486766	5.83594e-06	6.88942e-05	1.35934e-07	0.00015678	-0.00219921	0.000472109	-0.000379604	-0.00175781	-0.000176216	0.000459365	0.000432611	3.41451e-05	0.000545223	0.000546811	0.000183621	0.00127879	0.00334086	0.000789847	0.000771626	0.000146356	0.221378	0.260514	0.86429	0.899447	0.999802	0.393202	0.0854785	0.887622	0.630799	0.0227247	0.228583
calcium-rs34372369	G	A	0.00417549	-0.00738088	0.000587461	-7.45714e-05	0.00196103	0.00251504	-0.000318046	-0.0051296	-0.0205654	0.000618703	-0.000711689	0.000333493	0.0037935	0.000636512	7.65163e-05	0.00122633	0.00123062	0.000414048	0.00285396	0.00724973	0.00176397	0.00172435	0.000327129	0.051696	0.35604	0.329769	0.109799	0.040982	0.442405	0.0722796	0.00455854	0.725781	0.679805	0.307989
calcium-rs34826779	G	T	0.00216094	-0.000144648	-0.000478783	-9.03158e-06	-0.000354365	-9.30312e-05	-1.37375e-05	0.000377331	0.000909263	-0.00153814	-0.000895519	-0.000114058	0.000745739	0.00038497	3.85238e-05	0.000614089	0.00061568	0.000206993	0.00142782	0.00374753	0.000886946	0.000865735	0.000164839	0.846203	0.213616	0.814642	0.563901	0.879894	0.947086	0.791572	0.808292	0.0828848	0.30095	0.488979
calcium-rs35096828	T	C	0.000842207	0.000664806	-0.000540686	8.53468e-05	0.000259467	0.00122762	8.71778e-05	0.00111423	0.01042	0.00127127	0.00132494	-0.000145034	0.00071735	0.000383648	3.79425e-05	0.000605307	0.000607189	0.000203907	0.00141779	0.00373911	0.000876357	0.000856678	0.000161784	0.354056	0.158739	0.0244899	0.668176	0.0431975	0.668989	0.431932	0.00532435	0.146884	0.121962	0.370005
calcium-rs353634	G	A	0.00239751	-0.000472432	0.000393534	3.97892e-05	0.000138028	-0.000951587	-4.69035e-05	0.000551153	0.00148563	0.000316654	0.000406612	-0.000184824	0.000687706	0.000388764	3.78458e-05	0.000602725	0.000604214	0.000202696	0.00140094	0.00363736	0.000873299	0.000851899	0.000160123	0.492103	0.311411	0.293098	0.818864	0.115277	0.817006	0.694011	0.682954	0.716908	0.633149	0.248397
calcium-rs35587941	G	T	0.00486953	-0.000324402	-0.000102706	3.49169e-06	-0.00123987	0.000337685	5.8123e-05	-0.00308806	-0.00230271	-0.000667003	-0.00064958	-3.53917e-05	0.000505846	0.000423084	3.54174e-05	0.000564463	0.000566106	0.000189832	0.00130584	0.00345203	0.000817929	0.000798151	0.000150472	0.521325	0.808194	0.921466	0.0280544	0.550839	0.759467	0.0180399	0.504735	0.4148	0.415729	0.814051
calcium-rs35590487	C	T	0.00456632	0.000683576	2.70465e-05	4.71788e-05	-0.000111094	-0.000584089	0.00012421	-0.000925699	0.00458685	-0.00111305	-0.00113613	0.000179314	0.000832145	0.000389676	4.00028e-05	0.00063963	0.000641653	0.000215501	0.00150238	0.00397235	0.000925334	0.00090346	0.000170994	0.411383	0.944665	0.238245	0.862114	0.362671	0.564361	0.537793	0.248217	0.229033	0.208564	0.294336
calcium-rs35610022	T	C	0.0132666	0.000355359	-0.000389458	7.77206e-05	0.000554399	0.000979673	-9.94044e-05	0.00204379	0.00979838	0.00195751	-8.97477e-05	-2.33095e-05	0.000461082	0.000435058	3.442e-05	0.000549096	0.000550668	0.000185197	0.00127733	0.00331224	0.000791858	0.000775531	0.000146203	0.440881	0.370688	0.0239462	0.312661	0.075231	0.591441	0.109589	0.00309438	0.0134352	0.907871	0.873329
calcium-rs35758545	C	T	0.012314	0.000311453	0.000393724	-1.1709e-05	-9.54584e-05	0.000193891	-0.000168924	0.000691293	-0.0046101	0.000339701	-0.000954912	3.61969e-05	0.000587613	0.000388463	3.57214e-05	0.000570645	0.000572337	0.000192082	0.00133095	0.00353059	0.000826302	0.000806215	0.000151613	0.596091	0.310802	0.743074	0.867149	0.734783	0.379168	0.603483	0.191636	0.680992	0.236242	0.811303
calcium-rs357724	A	G	0.00304953	0.000813856	4.97157e-05	-2.96841e-05	0.000449702	0.000194604	-0.000124757	-0.00158222	1.35424e-05	-1.27323e-05	-0.00029349	1.99673e-06	0.000834574	0.000395608	4.06355e-05	0.000646869	0.000648817	0.00021726	0.00150231	0.00386559	0.000932685	0.000913322	0.000171657	0.329475	0.899994	0.465087	0.486932	0.764226	0.565812	0.292253	0.997205	0.989108	0.747951	0.990719
calcium-rs36032443	A	C	0.00678375	0.00249447	-0.00293178	-8.77992e-06	-0.000113392	-0.000377587	0.000415477	-0.000614795	0.00203524	-0.000692218	-0.00128107	1.8862e-06	0.000554541	0.000391149	3.50905e-05	0.000560244	0.000562103	0.000187914	0.00131509	0.00350942	0.000811672	0.000793496	0.000149536	6.85438e-06	6.63864e-14	0.802427	0.839606	0.50175	0.0270374	0.640147	0.561958	0.393755	0.106428	0.989936
calcium-rs36086195	T	C	0.00147556	-0.000231825	-0.000183394	-2.03577e-05	0.000554708	0.000459113	-0.000144761	0.00155877	-0.00106905	5.11232e-05	0.000929848	-2.37303e-05	0.000502359	0.000405721	3.45029e-05	0.000549494	0.000551065	0.000184348	0.00128873	0.00344987	0.000796462	0.000776982	0.000146252	0.644461	0.651255	0.555173	0.312742	0.404768	0.432301	0.226456	0.756653	0.948821	0.231409	0.871104
calcium-rs36104352	A	C	0.712351	0.000851484	3.30773e-05	-0.000115196	0.00145821	-0.00218751	0.000308913	-0.00375684	0.0012045	-0.00163618	-0.00098626	-0.000115626	0.00160533	0.000457526	5.2148e-05	0.000832861	0.000835803	0.000279105	0.00192109	0.0052485	0.00120543	0.00117683	0.000222833	0.595829	0.942366	0.0271736	0.0799737	0.00886472	0.268382	0.050516	0.818485	0.174673	0.401997	0.603837
calcium-rs368295038	T	C	1	-7.24645e-05	-0.000259583	-2.62247e-05	0.00061732	0.000213976	-0.00016529	-0.00035388	0.00096765	0.000830172	0.00157157	-0.000108089	0.00125948	0.000425874	4.73686e-05	0.000753548	0.000755943	0.0002534	0.00177165	0.00467532	0.00108676	0.00106291	0.000201346	0.954119	0.542173	0.579833	0.412663	0.777132	0.514217	0.841679	0.836034	0.44493	0.139262	0.591383
calcium-rs3791763	C	G	0.00312082	0.00148049	-5.84272e-05	-0.000134035	0.00130318	0.00041331	0.000441348	-0.000793864	0.000352789	0.00024263	-0.000285528	0.000204057	0.000984025	0.000399836	4.26911e-05	0.000680179	0.00068217	0.000228516	0.0015783	0.00405743	0.000987288	0.000962427	0.000180682	0.132447	0.883821	0.00169181	0.0553752	0.544598	0.0534394	0.614974	0.930712	0.805873	0.766715	0.258742
calcium-rs3798236	T	C	0.00354806	0.000291077	-0.000364667	2.65478e-05	0.000126737	0.000245953	0.000195677	-0.000545172	-0.000772548	-8.89255e-05	-0.00035968	-0.000194564	0.000564571	0.000394018	3.54752e-05	0.000566027	0.000567734	0.000190186	0.00131525	0.00348152	0.000821626	0.000800319	0.000151221	0.606153	0.354702	0.454251	0.82283	0.664856	0.303543	0.678507	0.824392	0.913813	0.653129	0.198228
calcium-rs3824338	C	A	0.00125449	-0.000143824	-0.000397472	-1.37854e-05	0.000515892	0.000464041	0.000154771	-0.00281234	-0.00603355	-0.0012538	0.0007544	2.30307e-05	0.000488042	0.000415231	3.44759e-05	0.000549355	0.000551067	0.000185063	0.0012799	0.00349088	0.000796705	0.000775437	0.000146792	0.768226	0.338453	0.689261	0.347687	0.399746	0.402979	0.0279989	0.083923	0.115551	0.330619	0.875329
calcium-rs3829577	A	G	0.00467397	-2.57409e-05	-6.97733e-05	-1.85111e-05	0.000309302	-0.000486417	-0.000254722	0.000876888	0.00510926	-0.000424164	0.000399216	0.000116005	0.000452893	0.000437253	3.42359e-05	0.000545783	0.000547278	0.000183419	0.00127077	0.00339173	0.000789689	0.000769669	0.000145032	0.954675	0.873218	0.588719	0.57091	0.374114	0.164912	0.490166	0.131969	0.59118	0.603981	0.423795
calcium-rs3859863	T	C	0.000582372	0.000418916	-0.000139922	1.01308e-05	0.000224041	-0.00157506	-0.000185055	-0.00274144	-0.00306872	-0.000261983	0.000317733	-7.1755e-07	0.000682025	0.000420026	3.96498e-05	0.000635009	0.000636999	0.00021372	0.00147561	0.00385539	0.000916307	0.000895068	0.000168853	0.539069	0.739039	0.798331	0.724227	0.0134134	0.386559	0.0631945	0.426059	0.774946	0.722604	0.996609
calcium-rs3905668	A	G	0.000641443	-0.000154821	0.000376106	-2.63322e-05	0.000737942	-0.000414853	2.72351e-06	0.00196768	0.00239141	0.00047435	0.000157072	1.56009e-05	0.000728291	0.000384114	3.81787e-05	0.000608775	0.00061077	0.000204487	0.00140856	0.00376997	0.000879889	0.000860758	0.000161686	0.831654	0.327507	0.490378	0.225446	0.496992	0.989373	0.162432	0.525866	0.589818	0.855206	0.923133
calcium-rs3931841	G	A	0.000704085	0.000238139	0.000313454	-1.56236e-05	0.00106893	-0.000118937	3.19583e-05	0.00264165	0.00450436	0.000755768	0.00121953	-1.26318e-05	0.000643865	0.000387081	3.69279e-05	0.000588143	0.000589846	0.000197943	0.00137155	0.00364278	0.000852046	0.000832414	0.000156598	0.711488	0.418062	0.672234	0.0691469	0.840198	0.871737	0.0541021	0.216268	0.375079	0.142908	0.93571
calcium-rs4073398	C	T	0.00342772	0.000333611	-0.000564107	6.19814e-07	-0.00015469	0.000423664	-5.79793e-05	0.000118339	-0.001968	-0.000460888	-0.000365956	2.41533e-05	0.000641151	0.000383602	3.65548e-05	0.000583798	0.000585699	0.000196156	0.0013573	0.00349737	0.000843192	0.000825237	0.000156122	0.602834	0.141413	0.986472	0.791032	0.469467	0.767553	0.930523	0.573634	0.584655	0.657437	0.877052
calcium-rs4247194	C	A	0.014488	-0.00118429	0.00203386	-3.37942e-05	-0.000739999	-0.000204535	-0.000139959	0.000238917	0.00354643	-0.00181168	-0.000545654	-4.7914e-05	0.000577111	0.000518465	4.17287e-05	0.000664813	0.000666964	0.0002238	0.00154712	0.00412447	0.000964272	0.000942587	0.000179139	0.0401616	8.75478e-05	0.418024	0.26567	0.759098	0.531725	0.877273	0.389872	0.0602734	0.562665	0.78911
calcium-rs4365062	T	C	0.000669983	0.000201408	-0.000428476	-4.64922e-06	-0.000825285	-0.000736231	-2.64985e-05	0.000566413	0.00362804	-0.000861847	0.000210376	-0.000145476	0.000475659	0.000418589	3.41995e-05	0.000545826	0.000547467	0.000183842	0.00127264	0.00340756	0.0007883	0.000772122	0.00014635	0.671983	0.306016	0.891866	0.130537	0.178692	0.885392	0.65627	0.28701	0.274265	0.785265	0.320211
calcium-rs453639	A	C	0.00295241	-0.000458436	0.000566172	-5.04007e-05	0.00020055	-3.82945e-05	0.000150919	-0.00296863	1.90198e-05	-0.000116215	-0.000388153	0.000165215	0.000576285	0.000392006	3.56965e-05	0.00056985	0.000571439	0.000191925	0.00132955	0.00351392	0.000824919	0.000805389	0.000151704	0.426322	0.148658	0.157974	0.724887	0.946571	0.431668	0.0255633	0.995681	0.887964	0.629846	0.276128
calcium-rs4553272	C	T	0.00252432	0.000440042	0.0002844	-4.49264e-05	0.000989931	0.00012689	0.000116238	-0.00259831	0.000467168	0.000423623	-0.000206469	0.000245784	0.00045989	0.00043101	3.42331e-05	0.000545865	0.000547415	0.000182943	0.00127982	0.00346737	0.000787427	0.000771393	0.000144904	0.338648	0.509354	0.189397	0.0697545	0.816695	0.525183	0.042335	0.892823	0.590589	0.788963	0.0898543
calcium-rs4653767	T	C	9.43481e-08	-0.000613136	-0.000463119	6.99323e-06	0.000780775	0.00018249	1.54348e-05	-0.00105185	-0.000357827	-0.000462709	0.000255376	0.000112047	0.00071415	0.000383798	3.78939e-05	0.00060496	0.000606635	0.000203529	0.00142983	0.00372742	0.000875957	0.000855037	0.000161064	0.390588	0.22756	0.853584	0.196836	0.76355	0.93955	0.461947	0.923522	0.597339	0.765191	0.486638
calcium-rs4744854	C	G	0.00298495	-0.000349887	0.00079003	1.91483e-05	5.03229e-05	-0.000395471	-2.74739e-05	0.00269105	-0.00172518	0.000436639	-0.000901054	0.000236543	0.000559795	0.000394703	3.53493e-05	0.000564473	0.000566062	0.000189757	0.00131856	0.00347648	0.000817659	0.000796002	0.000151015	0.531954	0.045331	0.588034	0.928963	0.484781	0.884881	0.0412616	0.619723	0.593335	0.257647	0.117268
calcium-rs4758621	A	G	0.00184138	-0.000205461	-0.000313245	2.3059e-05	-0.000348226	-0.000402916	-0.000268146	-0.000266754	-0.00718795	-0.000880588	-4.89656e-05	-9.80925e-05	0.000654191	0.000385738	3.69265e-05	0.000589377	0.000590958	0.000197952	0.00138195	0.00360633	0.000852077	0.000832639	0.000157636	0.753469	0.416754	0.532328	0.554629	0.495366	0.175546	0.846937	0.0462463	0.30139	0.953105	0.533763
calcium-rs4759076	T	C	0.000915561	0.000499067	-0.000198982	6.23879e-06	0.0007567	0.00141876	-3.81905e-05	-0.000604861	-0.00707414	-0.000313913	0.000495897	0.00030027	0.00047762	0.000425273	3.4551e-05	0.000551542	0.000553336	0.000185705	0.00129025	0.00336905	0.00080065	0.000780805	0.000147338	0.296069	0.639862	0.856707	0.170073	0.0103478	0.837063	0.639219	0.0357525	0.695005	0.525358	0.0415555
calcium-rs4763297	A	C	0.00658603	5.22799e-06	0.000165723	-8.84584e-05	0.000333588	0.000856063	-0.000242877	-0.00110111	-0.00114497	-0.000901134	-0.000393715	-6.59044e-05	0.000494385	0.000411531	3.45526e-05	0.000550362	0.000551933	0.000185245	0.00128794	0.00347554	0.000799431	0.000778286	0.000147205	0.991563	0.687171	0.0104645	0.544432	0.120897	0.189822	0.392586	0.741827	0.259652	0.612946	0.654366
calcium-rs4790310	T	C	0.00103665	-0.000823683	-5.19214e-05	-1.74653e-05	-9.43284e-05	4.73125e-05	-9.49272e-05	-0.000702457	0.00197612	5.75211e-05	0.000982026	-0.000161134	0.000500435	0.000408514	3.45696e-05	0.000550535	0.000552177	0.00018477	0.00127932	0.00335168	0.000796358	0.000778386	0.000145488	0.099779	0.898863	0.613404	0.863957	0.931718	0.607422	0.582946	0.555465	0.942419	0.207088	0.268063
calcium-rs4795361	A	G	0.00174513	-0.00119768	0.000272738	-3.16088e-06	0.000698587	0.000400852	9.51745e-05	-0.00122137	0.0010207	-0.0014891	-0.000797654	-8.38576e-05	0.000790924	0.000388135	3.9339e-05	0.00062793	0.000629795	0.000211343	0.00144963	0.00377703	0.000907417	0.000885053	0.000165677	0.129957	0.482251	0.935959	0.265914	0.524465	0.652472	0.39949	0.786977	0.100793	0.367457	0.612752
calcium-rs4805129	C	T	0.00145345	-0.00112104	-0.000776923	4.53139e-05	1.86231e-05	0.000716818	-8.59326e-05	7.65244e-05	0.00754442	0.00100556	0.000224474	4.61411e-05	0.000557044	0.000392858	3.52309e-05	0.000562588	0.000564078	0.00018928	0.00131214	0.00347404	0.00081175	0.000793665	0.000149892	0.0441705	0.0479733	0.198375	0.973593	0.203809	0.649832	0.953494	0.0298827	0.215437	0.777306	0.758214
calcium-rs4841132	G	A	0.0020285	-0.00142919	-0.000348245	-6.38873e-05	4.94967e-05	0.00152202	2.52551e-05	-0.00261366	0.00898756	0.000304168	-0.00105628	0.000492037	0.00214524	0.000504926	5.87738e-05	0.000941852	0.000944426	0.000314253	0.0022041	0.00581896	0.00137948	0.00132233	0.000250558	0.505273	0.490387	0.277037	0.958089	0.107054	0.935947	0.235697	0.122462	0.825486	0.424407	0.0495594
calcium-rs4842685	A	G	0.00447708	0.00037197	0.000228133	-4.58306e-05	0.000354689	-0.00032724	-0.000216019	-0.000558617	0.00135318	0.00116021	-0.000627963	0.000140609	0.000482155	0.000437396	3.52289e-05	0.000562521	0.000564098	0.000189172	0.00132218	0.00348203	0.000816025	0.00079654	0.000150008	0.440427	0.60197	0.19328	0.528346	0.56184	0.25349	0.672664	0.697558	0.15509	0.430486	0.348583
calcium-rs4918	C	G	0.251915	0.000474918	-0.000643688	-3.17745e-05	-0.000206986	-0.000150532	-0.000161739	-0.00035923	-0.000196538	-0.00063649	0.00112454	-0.000205628	0.000575265	0.000390217	3.53809e-05	0.000566274	0.000568089	0.000190535	0.00133404	0.00354301	0.000823253	0.000802154	0.000151177	0.409052	0.0990341	0.369149	0.714722	0.791026	0.395957	0.787714	0.955762	0.439441	0.160946	0.173777
calcium-rs498490	C	T	0.006585	0.00114837	-0.000531997	-3.3835e-05	-0.00115664	0.000130149	-4.34515e-05	-0.00134493	0.00271692	-0.00161496	-0.00112059	5.01952e-06	0.00119054	0.000418559	4.60685e-05	0.000733973	0.000736301	0.000247014	0.00169388	0.00431049	0.001057	0.00103664	0.000193528	0.334756	0.203722	0.462676	0.115058	0.859697	0.860367	0.427201	0.528496	0.126547	0.279705	0.979308
calcium-rs5009257	C	A	0.000627226	0.000196792	0.00040326	-4.49892e-05	0.000653166	0.0006616	0.000174336	0.00105232	-0.000445238	0.000265765	-0.00136531	0.000142581	0.000618786	0.000385505	3.62614e-05	0.000578516	0.000580406	0.000194924	0.0013508	0.00354459	0.000837712	0.000817496	0.000154054	0.750463	0.295535	0.214722	0.258884	0.254333	0.37112	0.43596	0.90004	0.751054	0.0948997	0.354694
calcium-rs535696392	T	TA	0.951975	0.000402249	2.96334e-05	2.4258e-05	-0.000352149	-3.12863e-05	-2.65561e-05	-0.000551762	-2.80368e-07	0.00128862	0.00143293	-0.000211823	0.000457903	0.000455915	3.5136e-05	0.000561131	0.000562712	0.000188504	0.00131106	0.00342254	0.00081057	0.000791254	0.000149877	0.379696	0.948176	0.489941	0.530286	0.955661	0.887966	0.673864	0.999935	0.111889	0.0701502	0.157567
calcium-rs541391299	CT	C	0.000489562	2.97649e-05	0.000439173	-7.87921e-05	-0.000864241	-0.000136307	3.52445e-05	-0.00271855	0.00335682	-0.00183873	-0.00122254	-0.000243443	0.000584205	0.000429707	3.795e-05	0.000605064	0.000606812	0.000203468	0.00140882	0.00372974	0.000876268	0.000856437	0.000160907	0.959366	0.306769	0.0378761	0.153194	0.82227	0.86248	0.0536501	0.368114	0.0358749	0.153448	0.130296
calcium-rs56406311	C	T	0.0299	-0.000527468	0.000482657	1.04782e-05	0.000974432	0.000693361	-0.000103492	0.000113294	0.007414	0.00115761	0.000211051	8.16721e-05	0.000540283	0.000396396	3.50459e-05	0.00055889	0.000560396	0.00018771	0.00130874	0.00342427	0.00080999	0.000789834	0.000148576	0.328927	0.223372	0.764953	0.0812453	0.215989	0.581399	0.931016	0.0303786	0.15296	0.789308	0.582527
calcium-rs57131731	C	T	0.000238257	0.000796685	1.9636e-05	-1.99453e-05	0.000363802	0.000196743	-0.000440488	-0.00215671	-0.00358944	-0.00168409	-7.89558e-05	0.000117915	0.00105871	0.000407163	4.39187e-05	0.000700572	0.000702385	0.000236394	0.0016566	0.0044012	0.00101605	0.000990922	0.000185426	0.451747	0.961536	0.649728	0.603557	0.779396	0.0624126	0.192955	0.414752	0.097423	0.936493	0.524834
calcium-rs57564578	G	A	0.0156705	0.00216	-0.000873856	-5.38496e-05	0.000724365	0.00241164	0.000480029	-0.000403125	-0.00718248	0.000502497	0.00252422	0.000350831	0.00289993	0.000568187	6.77515e-05	0.00108268	0.00108535	0.00036246	0.00248945	0.00649309	0.001563	0.0015242	0.000284245	0.456365	0.124057	0.426725	0.503465	0.0262847	0.185383	0.871359	0.268653	0.747836	0.0977042	0.217109
calcium-rs5758888	C	G	0.00816538	-0.000692782	0.00017923	-1.194e-05	-0.000532625	-0.000556902	-0.000224091	0.00434078	0.00932058	-0.000555523	-9.79031e-05	0.000147808	0.000797794	0.000388616	3.94698e-05	0.000631132	0.000632995	0.000211822	0.0014725	0.00382123	0.000909138	0.000888605	0.000167613	0.385191	0.644654	0.762265	0.398715	0.378974	0.290093	0.0031998	0.0147223	0.541172	0.91227	0.377864
calcium-rs59345777	CA	C	0.0579941	-4.67626e-05	0.000413908	-6.43518e-06	0.000479868	-0.001	-1.99417e-06	0.00103117	0.00367722	4.39317e-05	0.000516116	-0.000151536	0.000575306	0.000407062	3.64851e-05	0.000582513	0.000584217	0.000196278	0.00135606	0.00351912	0.000840706	0.00082248	0.000155984	0.935217	0.309241	0.859997	0.41006	0.0869536	0.991894	0.44701	0.296059	0.958325	0.530325	0.331309
calcium-rs6013897	T	A	0.0103087	-0.00770294	0.00309701	2.03119e-05	-6.52868e-05	0.000220475	0.000547111	-0.00318967	0.00199516	-0.000711793	-0.000606994	0.00014527	0.00100936	0.000408686	4.30207e-05	0.000684829	0.00068693	0.000230051	0.00160372	0.00422918	0.000992087	0.000971761	0.000183421	2.32899e-14	3.52315e-14	0.636827	0.92405	0.748243	0.0173976	0.046712	0.637098	0.473085	0.532213	0.42836
calcium-rs60155540	G	A	0.000630702	0.00331408	-0.00237527	1.33084e-05	0.00017678	0.000571888	0.0005503	-0.00186013	-0.00651129	-2.18705e-05	-6.86972e-06	1.79809e-05	0.000993604	0.000401259	4.29028e-05	0.000683706	0.000685921	0.000230624	0.00159941	0.00425758	0.000989696	0.0009693	0.000180809	0.000851858	3.23297e-09	0.75641	0.795974	0.404422	0.0170274	0.244825	0.126182	0.98237	0.994345	0.920784
calcium-rs6029320	G	A	0.0930882	-0.00476351	0.000941764	5.24188e-06	0.000901194	0.00292601	0.000144679	-0.000420387	0.0197494	-0.000183563	0.000991375	-9.62048e-05	0.00317473	0.000599262	7.1938e-05	0.00114207	0.00114525	0.00038422	0.00265661	0.00703294	0.00165007	0.00160783	0.0003057	0.133501	0.116059	0.941912	0.43006	0.0106222	0.706508	0.874266	0.00498337	0.911422	0.537506	0.752988
calcium-rs6111	C	T	0.00166594	-0.000970523	-0.000544724	-0.000122851	-0.00133967	-2.36337e-05	2.92884e-05	-0.000790708	0.0012512	0.000935379	0.000111858	0.000235272	0.00194731	0.000487739	5.66284e-05	0.000904671	0.000907058	0.000304919	0.00213146	0.00564803	0.00131787	0.00127973	0.000240389	0.618208	0.264066	0.0300515	0.13865	0.979213	0.923479	0.710661	0.824681	0.47785	0.930348	0.327722
calcium-rs611150	C	T	0.0146675	0.000510758	5.02513e-05	-2.29516e-05	-0.000989881	0.000914908	1.48859e-06	0.000251116	-0.00135771	-6.29021e-05	-0.000220998	-3.60374e-05	0.00110737	0.000412487	4.47953e-05	0.000715477	0.000717733	0.000239759	0.00167442	0.00430533	0.00103665	0.00101473	0.000188852	0.644632	0.903038	0.608395	0.166505	0.20241	0.995046	0.880787	0.752492	0.951616	0.827593	0.848665
calcium-rs6123359	A	G	0.0611388	0.000157598	-0.00141354	2.41851e-05	-0.0004512	0.00115968	-0.000437209	0.00131699	0.000246635	-0.00204344	-0.000920097	0.000232151	0.00190384	0.000491236	5.63972e-05	0.000903944	0.000907079	0.000304147	0.00208619	0.00557666	0.00130455	0.00126839	0.000237249	0.934027	0.00400855	0.668044	0.617677	0.201081	0.15058	0.527851	0.964724	0.117259	0.468203	0.327822
calcium-rs6127099	A	T	0.00963974	-0.006385	0.00354182	3.29853e-05	-0.000293249	-0.000108431	0.000233409	-0.00190298	-0.00198278	3.7404e-05	0.000259798	7.35e-05	0.00077188	0.000407301	3.96734e-05	0.000634376	0.000635998	0.000213302	0.00148145	0.00389834	0.000919887	0.0008982	0.000168838	1.32502e-16	3.46766e-18	0.405737	0.643893	0.864626	0.27384	0.198953	0.611019	0.967566	0.772396	0.663324
calcium-rs61766352	T	C	0.00159886	0.000666498	-0.000447268	-2.1518e-05	-0.00128615	-0.000813762	-0.000312338	-0.000419718	-0.00478443	-0.000251789	-0.00173407	-4.73004e-05	0.000747994	0.000393694	3.91448e-05	0.000624585	0.000626556	0.000210368	0.00145129	0.00378124	0.000901495	0.000881562	0.00016675	0.372905	0.255924	0.582524	0.0394749	0.194019	0.137618	0.772426	0.205763	0.780014	0.0491801	0.776671
calcium-rs61770531	T	C	0.00383471	-0.000135119	0.000211596	-0.000136175	-0.00109066	-0.00104475	-3.27282e-05	-0.001598	-0.0042323	-0.000785736	0.000623129	-0.000238814	0.00219914	0.000513749	6.02612e-05	0.000960299	0.000963484	0.000323072	0.00224514	0.00585485	0.00140292	0.00136038	0.000255728	0.951007	0.680438	0.023838	0.256062	0.278215	0.91931	0.476615	0.469759	0.575431	0.646913	0.350377
calcium-rs61779309	T	C	0.00237081	0.00135597	-0.000294767	-2.82505e-05	-0.000133345	-0.000302995	-0.000102218	0.00348282	0.011489	-0.00134484	-0.000410401	6.79079e-05	0.000943205	0.000397315	4.20144e-05	0.000670375	0.000672183	0.000225639	0.00154094	0.00406078	0.000969042	0.000942149	0.000178953	0.150542	0.458151	0.50133	0.842332	0.652161	0.650539	0.0238101	0.00466587	0.165198	0.663127	0.704337
calcium-rs61781578	C	G	0.00546983	0.000993016	-0.000352719	8.46866e-05	0.000861165	0.000247004	9.74616e-05	0.00216762	0.00259694	-0.000343232	0.000863835	-1.70513e-06	0.00172484	0.000472443	5.41407e-05	0.000864806	0.000867509	0.00029091	0.00202312	0.00514233	0.00124775	0.00121433	0.000228959	0.564809	0.455316	0.117773	0.319353	0.775853	0.737608	0.28398	0.613551	0.783254	0.47686	0.994058
calcium-rs62134669	T	C	0.0109543	-0.00115445	5.41239e-05	2.91035e-05	0.000324182	-0.000826151	8.51541e-05	-0.000167904	0.00183591	0.000731876	0.00123568	0.000287072	0.00131575	0.000431857	4.81555e-05	0.000767883	0.000770225	0.000258943	0.0017921	0.00472746	0.00110976	0.00108273	0.000204888	0.380264	0.900264	0.545602	0.672897	0.283447	0.742267	0.925355	0.697758	0.509583	0.253762	0.161182
calcium-rs62294588	T	G	0.00653933	-0.00159803	-0.000279317	-1.59808e-05	-0.00199622	0.000452675	-3.23145e-05	-0.00119331	0.00179168	-0.00232248	-0.00180176	-0.000135189	0.00174114	0.000474434	5.45985e-05	0.000869213	0.000871854	0.000291818	0.00206482	0.00527712	0.00125882	0.00122804	0.000234427	0.358721	0.556038	0.769753	0.0216435	0.603615	0.911826	0.563315	0.73422	0.0650458	0.142329	0.564157
calcium-rs62439474	C	T	0.00497469	-0.000132429	0.000435969	-2.4493e-05	-0.000930744	-0.0010654	-0.000159339	0.000365465	-0.00668372	-0.000670501	-1.13378e-05	4.84933e-05	0.000678039	0.000386919	3.74568e-05	0.000598591	0.000600558	0.000201211	0.00139426	0.00366329	0.000868469	0.000847704	0.000159667	0.845149	0.25984	0.513176	0.119973	0.0760622	0.42842	0.793228	0.0680757	0.440086	0.989329	0.761346
calcium-rs62575977	C	T	0.00102203	-0.000743634	0.000178404	4.30671e-05	-0.000172443	0.000217928	0.000116739	0.000764662	0.000846687	-0.000888537	-0.000553107	0.000135301	0.00053855	0.0003985	3.50666e-05	0.000560266	0.00056178	0.00018803	0.00131379	0.00355888	0.000810753	0.000789902	0.000149828	0.16734	0.654378	0.219392	0.758244	0.698072	0.534696	0.560549	0.811952	0.273106	0.483789	0.366506
calcium-rs6437257	A	G	0.00162186	0.00158244	0.000197442	2.51917e-05	-5.24196e-05	0.000552144	2.30683e-06	0.000315129	-0.00711974	-0.000337734	-0.000803687	-2.69521e-05	0.000568871	0.000390099	3.53222e-05	0.000564892	0.000566718	0.000189719	0.00132195	0.00348561	0.000821588	0.00079881	0.000151483	0.00540755	0.612764	0.475723	0.926066	0.329917	0.990299	0.811586	0.0410927	0.681018	0.314366	0.858784
calcium-rs6576983	T	G	0.000888392	0.00011927	0.000237863	1.45372e-05	3.5608e-05	-0.000162444	-0.000133533	-0.00141494	-0.000209209	-0.000991057	-0.000592859	-8.08969e-05	0.000532627	0.00039852	3.48561e-05	0.000556011	0.000557786	0.000186807	0.00129599	0.00344697	0.00080462	0.000785315	0.0001485	0.822814	0.550598	0.676632	0.948937	0.770876	0.474721	0.274932	0.951603	0.21806	0.450292	0.585919
calcium-rs6705452	G	C	0.000226215	1.58381e-05	-0.00017021	1.19003e-05	0.000135168	-0.000577518	-0.00032094	0.00092746	0.0011151	0.000389065	-0.000201984	-0.000139111	0.000501515	0.000406041	3.4432e-05	0.000549744	0.000551429	0.000185097	0.00127938	0.00343613	0.000794759	0.000775853	0.000147307	0.974807	0.675074	0.729631	0.80578	0.294957	0.0829369	0.468497	0.745542	0.624461	0.794603	0.344987
calcium-rs6717858	T	C	0.0513156	0.000190062	-0.000234958	4.39048e-05	-0.000175089	0.000482365	-5.03907e-05	-0.000739376	-0.000548765	0.000408136	0.00106996	0.00030327	0.000520108	0.00040081	3.47971e-05	0.000554238	0.0005558	0.000186537	0.00131248	0.00350575	0.00080149	0.000782613	0.000147844	0.714792	0.557737	0.207044	0.752072	0.385463	0.787055	0.573203	0.875613	0.610598	0.171577	0.040241
calcium-rs6722613	A	G	0.00161559	-0.000202564	0.00030156	-4.11318e-05	0.000416829	0.000209953	0.000195905	-0.000757325	0.000349202	-0.00144287	0.00010215	7.62378e-05	0.000497542	0.000412634	3.46366e-05	0.000552595	0.000553987	0.00018574	0.00129794	0.00341186	0.000798987	0.000779656	0.00014631	0.683913	0.464892	0.235022	0.450662	0.704699	0.29155	0.559568	0.918479	0.0709406	0.89576	0.60232
calcium-rs6804671	A	G	0.0174149	-0.000206093	-0.000279216	2.31735e-05	0.000258644	-0.000119451	-0.00042956	0.00046651	-0.0027021	0.00369884	0.00199804	0.000162941	0.000710487	0.000383176	3.78228e-05	0.000603709	0.000605525	0.000202993	0.00141725	0.00375871	0.000875633	0.000854237	0.000159775	0.771761	0.466192	0.540085	0.668342	0.843617	0.0343349	0.74203	0.472209	2.39956e-05	0.019338	0.307818
calcium-rs6824037	C	T	0.000278687	0.00695757	-0.000231286	3.84408e-05	-0.000451471	0.000477461	-0.000856202	0.0018831	-0.00515955	8.83369e-06	-0.000890177	3.40895e-05	0.00299989	0.000587575	7.0012e-05	0.00111852	0.00112173	0.000375273	0.00263382	0.00704876	0.00162534	0.0015884	0.000294593	0.0203809	0.693856	0.582965	0.686483	0.670364	0.0225171	0.47463	0.464181	0.995664	0.575192	0.907877
calcium-rs6830950	T	C	0.00774939	0.00127521	-0.000110683	7.46907e-07	0.000921441	0.0001596	0.000274261	-0.000297047	0.0064924	-0.000550093	-0.000531569	3.39556e-05	0.000750867	0.000384887	3.86292e-05	0.000615817	0.00061746	0.000206258	0.00142613	0.00379874	0.000887771	0.000867959	0.000163191	0.0894481	0.773675	0.984574	0.13458	0.796038	0.183619	0.835004	0.0874348	0.5355	0.54025	0.835173
calcium-rs6841429	C	A	0.00344204	0.00184593	-0.000836574	4.30755e-05	0.000510407	-0.000145364	-0.000157081	-0.00438513	-0.00495768	-0.000890254	-0.000294483	-8.46636e-05	0.00115615	0.000416784	4.55957e-05	0.000726947	0.00072888	0.000244458	0.00169043	0.00453572	0.00105193	0.00102397	0.000194992	0.110353	0.044728	0.3448	0.482602	0.841923	0.520506	0.00948489	0.274382	0.397385	0.773661	0.664152
calcium-rs6894167	T	C	0.00639572	0.000116755	0.000142919	-7.83052e-06	-0.000149112	0.000352767	4.59635e-05	0.000970375	-0.000587586	0.000622162	-0.000196447	0.000190475	0.000456542	0.000428903	3.39337e-05	0.000542	0.000543488	0.000182107	0.00126159	0.00342126	0.000781593	0.00076464	0.000144425	0.798155	0.738969	0.817502	0.783229	0.516288	0.800733	0.441796	0.863638	0.426023	0.797245	0.187221
calcium-rs690170	G	C	0.00446885	-0.00300153	0.00311051	4.15001e-05	-0.000974547	-0.000421157	0.00014668	-0.00051457	-0.00255922	0.000531595	0.000312169	-0.000126009	0.00267084	0.000555977	6.59146e-05	0.00105405	0.0010559	0.000354254	0.00251296	0.00648838	0.00151947	0.00147675	0.000282246	0.261094	2.21297e-08	0.528954	0.355189	0.689995	0.678836	0.837754	0.693263	0.726447	0.832584	0.655271
calcium-rs6909201	G	A	0.0068445	-0.00063164	0.000777677	-1.19081e-05	0.00042484	0.000182296	-3.41832e-05	-0.0004141	-0.00263922	0.000192829	-0.000348548	-9.25129e-05	0.000454409	0.000434328	3.39687e-05	0.000542943	0.000544523	0.000182287	0.00126069	0.00334861	0.000784318	0.000766163	0.000144869	0.164523	0.0733701	0.725917	0.433936	0.73779	0.85125	0.742556	0.430608	0.805794	0.649163	0.523086
calcium-rs6991921	A	G	0.0179257	-0.000992286	0.000178357	1.23594e-05	0.000392111	-0.00065409	-0.000214762	-0.00048246	0.00310063	-0.00212061	-0.00159915	-7.91156e-05	0.000726562	0.000384545	3.81359e-05	0.000609285	0.000611158	0.000204857	0.00142193	0.00380523	0.000881732	0.000859014	0.000161964	0.172026	0.642782	0.745872	0.519862	0.284509	0.294478	0.734384	0.415169	0.0161717	0.0626604	0.625214
calcium-rs6994620	G	A	0.000289581	0.000310938	-1.32452e-05	7.6087e-05	-0.000653538	-0.00091587	0.00012161	-0.00163299	-0.00120973	0.000987951	-6.43912e-05	-4.25077e-05	0.000471551	0.000420275	3.4097e-05	0.000545111	0.00054687	0.000183079	0.00127636	0.00337139	0.000789845	0.000771806	0.000145084	0.509643	0.974858	0.0256497	0.230565	0.0939849	0.506532	0.200755	0.719728	0.211004	0.93351	0.769532
calcium-rs7003580	C	T	0.000991015	-0.000306252	-2.92569e-05	6.92174e-06	-0.000162072	6.94084e-05	-0.000290205	0.000732084	0.00112684	0.00092269	0.000606367	-0.000127185	0.000522353	0.000400599	3.48235e-05	0.000555197	0.000556861	0.000186623	0.00130023	0.00342416	0.000804667	0.000784004	0.000147847	0.55768	0.94178	0.842446	0.770349	0.900807	0.11994	0.573407	0.742091	0.251519	0.439273	0.389654
calcium-rs7104110	T	C	0.00353578	0.000874964	-3.65476e-05	1.55579e-05	-0.000221399	-0.000712958	-0.000458424	-0.00097815	0.000239688	-0.00287393	-0.000563168	8.97697e-05	0.00163192	0.000461807	5.2722e-05	0.000842524	0.000844839	0.000282945	0.00199972	0.00525543	0.00122443	0.00119177	0.000225942	0.591852	0.936921	0.767923	0.79272	0.398727	0.105193	0.624741	0.963623	0.0189184	0.636537	0.691137
calcium-rs715	T	C	0.00391454	0.000541837	-5.53378e-05	4.6019e-05	-0.00203287	-0.00071705	8.02759e-05	0.000391754	-0.00338785	-0.00139688	-0.000431889	4.16229e-05	0.000653803	0.000386316	3.69485e-05	0.000590763	0.000592652	0.000198617	0.00138057	0.00374681	0.000857948	0.000834508	0.000158789	0.407249	0.886097	0.212953	0.000579483	0.226318	0.686085	0.776592	0.365893	0.103493	0.604782	0.793224
calcium-rs7221118	T	C	0.000855122	0.00139329	-0.000322883	2.19049e-05	-0.00063273	-0.000369319	0.000124632	0.000218073	0.000717102	-0.000279217	-0.000166804	-0.000121874	0.000921102	0.000395062	4.15275e-05	0.000663664	0.000665469	0.000223546	0.00153873	0.00410487	0.000958256	0.000934443	0.000177098	0.130375	0.413759	0.597861	0.340395	0.578912	0.57717	0.887299	0.861319	0.770761	0.858326	0.491345
calcium-rs722298	G	A	0.00286769	-9.16452e-05	0.000285671	4.98532e-05	-0.000747324	0.000848588	-5.41309e-05	-0.000946108	-0.000484221	-0.00206465	-0.0011506	1.45782e-05	0.000488222	0.000414191	3.44249e-05	0.000549215	0.000550831	0.000184813	0.00128767	0.00332496	0.000794372	0.000774751	0.000146641	0.851103	0.490378	0.14757	0.173606	0.123426	0.769603	0.462495	0.884212	0.00934782	0.137516	0.92081
calcium-rs7256735	T	G	0.00553984	-0.00366705	-0.000202876	6.22175e-05	0.00114363	0.000713863	-8.7991e-05	0.00234637	0.0101735	0.00161183	0.00121316	0.000235001	0.00154965	0.000452219	5.14478e-05	0.000821136	0.000823358	0.000276033	0.00188568	0.0050634	0.00118591	0.00115186	0.000221527	0.0179645	0.653704	0.226537	0.163701	0.385935	0.749901	0.213389	0.0445156	0.174102	0.292246	0.288773
calcium-rs73158188	C	T	0.000785862	-0.000818946	0.000516898	-5.92505e-05	-0.00142894	-0.000405761	-0.000109354	-0.00242133	0.00659129	-0.000750417	-0.000547305	0.000103745	0.000701812	0.000383919	3.77737e-05	0.000601697	0.000603301	0.000202063	0.00141654	0.00378421	0.000868789	0.000847365	0.000162252	0.243251	0.178183	0.116751	0.0175572	0.501223	0.588381	0.0873914	0.0815473	0.387726	0.518352	0.522558
calcium-rs73184027	C	T	0.00637679	-0.00325706	0.00133919	-3.41217e-05	-0.0010187	-3.80385e-05	-0.000508106	-0.0024663	-0.000310442	-0.00179788	-0.00232972	-0.000297598	0.00160014	0.000464058	5.22259e-05	0.000834491	0.000837739	0.000281321	0.00195671	0.0051649	0.00121139	0.00118921	0.000223765	0.041803	0.00390422	0.513533	0.222186	0.963784	0.0708971	0.207515	0.952071	0.137773	0.0501102	0.183535
calcium-rs73186030	C	T	0.0123637	-0.00390992	0.000438501	-5.46381e-05	0.000213149	0.000850186	9.904e-05	-0.000530533	-0.00230534	7.36008e-05	0.000126367	-2.4876e-05	0.00152414	0.000482034	5.10027e-05	0.0008127	0.000814627	0.000273158	0.001881	0.00490476	0.00117962	0.0011518	0.00021476	0.0103085	0.362988	0.284045	0.793111	0.296648	0.716923	0.777906	0.63834	0.95025	0.912637	0.907786
calcium-rs7328352	A	G	0.0364938	0.00721443	-0.00312126	-1.65525e-05	0.000585465	0.00128249	0.000146769	-0.0031716	-0.00393774	-0.000918664	-0.000181206	0.000161256	0.00127377	0.000425528	4.72951e-05	0.000755142	0.000757222	0.000254938	0.00178124	0.00460625	0.00108927	0.00106633	0.000201775	1.48191e-08	2.22439e-13	0.726352	0.438161	0.0903291	0.564816	0.0749854	0.392624	0.39902	0.865063	0.424183
calcium-rs7505693	G	C	0.029735	-0.000577503	-0.000638825	3.65489e-05	-0.000601271	3.4015e-05	0.000275715	0.000811641	-0.00230293	0.000124262	0.000712883	0.000112192	0.000480838	0.000415324	3.41497e-05	0.000545927	0.000547713	0.000184213	0.00127568	0.00337158	0.000790796	0.000772698	0.000146004	0.229739	0.124016	0.284504	0.270734	0.95048	0.134468	0.52462	0.494581	0.875138	0.356223	0.442241
calcium-rs7529925	T	C	0.00665341	-0.000752651	-0.000337047	3.82711e-05	0.00105255	0.000980176	-6.2083e-05	-0.00146607	-0.00182852	0.00129562	0.00146204	1.84729e-05	0.000766648	0.000387256	3.90448e-05	0.000621688	0.000623396	0.000209283	0.00144881	0.00386117	0.000903987	0.000878493	0.000165568	0.326228	0.384112	0.326996	0.0904465	0.115878	0.766737	0.31158	0.63581	0.151794	0.096062	0.911162
calcium-rs7559013	A	C	0.00735694	-0.000949531	0.000264136	6.24504e-05	-0.00220997	-0.000141402	-0.000157976	0.000223505	-0.0054264	-0.00114369	0.000490156	-7.92943e-05	0.00149656	0.000447677	5.05987e-05	0.000808913	0.000811307	0.000272533	0.00192079	0.00501788	0.00117372	0.00114715	0.000215697	0.525771	0.55518	0.217119	0.00629521	0.861639	0.562146	0.907366	0.279514	0.329853	0.669176	0.713158
calcium-rs7560701	G	C	0.00397856	-0.0002428	0.000604287	4.1259e-05	0.00116868	-0.000507689	-0.000214167	2.70887e-05	0.00442808	0.00130213	0.0012041	-8.4508e-05	0.000447822	0.000445161	3.43497e-05	0.000547501	0.000549302	0.000183707	0.00128277	0.00337623	0.000793284	0.000775543	0.000145947	0.587695	0.174637	0.229697	0.0327963	0.355361	0.243695	0.983152	0.189674	0.100709	0.120524	0.56257
calcium-rs760077	T	A	0.00255115	-0.00028567	0.000475468	3.54072e-05	2.16611e-05	0.000467714	-0.000120237	-0.000461755	-0.00880962	0.000724317	0.00106822	-0.000172778	0.000526659	0.000398595	3.46826e-05	0.000554258	0.000556225	0.00018627	0.00130136	0.0034667	0.000803815	0.000786948	0.000148588	0.58753	0.232925	0.307307	0.968826	0.40042	0.518606	0.722721	0.0110476	0.367538	0.17465	0.244912
calcium-rs77704893	T	C	0.000754013	-0.000883578	0.000263158	3.6233e-05	0.00165685	0.00101541	0.000245145	0.00415718	-0.00235031	0.00487311	0.000202376	0.000241608	0.00341514	0.000602012	7.26169e-05	0.00115611	0.00115978	0.000390826	0.00275085	0.00667878	0.0016702	0.00162272	0.000310419	0.795848	0.662017	0.617807	0.151826	0.381289	0.530497	0.13073	0.724909	0.00352699	0.90075	0.436376
calcium-rs7786368	T	C	0.00124146	0.000271365	-0.000267777	3.88668e-05	-0.00041441	-0.000167821	-0.000230301	0.00179018	-0.0019996	-0.000368631	0.00032126	7.9447e-05	0.000506981	0.000404227	3.44939e-05	0.000550585	0.000552243	0.000185387	0.00128115	0.00343225	0.000797285	0.000780878	0.00014642	0.592473	0.507688	0.25984	0.451648	0.761212	0.214138	0.162318	0.560168	0.643826	0.680773	0.587409
calcium-rs7900538	G	T	0.00128262	-0.0012912	-6.71697e-06	4.88538e-05	-0.0006501	0.000161425	-0.000269066	-0.00123164	0.00220861	-0.000616973	0.000103345	-0.000150285	0.00121779	0.000421233	4.65271e-05	0.000741189	0.000743125	0.000249374	0.00174441	0.0046164	0.00107701	0.00104931	0.000198046	0.289018	0.987278	0.293716	0.380431	0.828033	0.280605	0.480157	0.632346	0.566742	0.921545	0.447951
calcium-rs7968405	T	C	0.00216873	-0.00206903	3.45626e-05	1.21519e-05	-0.000574078	0.00111799	-3.89237e-05	-0.00238476	-0.0071133	-0.000379515	0.000523069	3.86719e-05	0.00111645	0.000412947	4.48143e-05	0.000716682	0.000718959	0.000240172	0.0016684	0.00448799	0.00103664	0.00101366	0.00018983	0.0638531	0.933297	0.786268	0.42312	0.119946	0.871254	0.152899	0.112976	0.71429	0.605841	0.838574
calcium-rs7978263	C	T	0.000594465	0.00127185	2.12422e-05	8.61886e-08	0.00032288	-0.000382145	2.60026e-05	0.00103625	0.00543501	0.00192323	0.000893354	1.94004e-05	0.000648884	0.000385458	3.68826e-05	0.000588032	0.000589783	0.000197817	0.00137142	0.00356874	0.000851558	0.000830604	0.000157673	0.0499898	0.956052	0.998135	0.582947	0.517023	0.895422	0.449889	0.127773	0.0239173	0.282132	0.902074
calcium-rs80212518	G	GGT	0.0179382	-3.22153e-05	-0.000148531	2.33772e-05	0.000190721	-0.000157143	-9.93961e-05	-0.0013056	0.00112291	0.000519619	0.00101364	0.00025517	0.000484532	0.000423782	3.46457e-05	0.000552809	0.000554466	0.000186182	0.00129523	0.00340837	0.000799585	0.000780425	0.00014788	0.94699	0.725972	0.499834	0.730093	0.77686	0.593435	0.313454	0.741812	0.515783	0.194004	0.0844351
calcium-rs8029829	T	G	0.00410239	0.00167726	-0.00204294	1.46916e-05	4.10706e-05	-8.49943e-05	-0.000248092	0.000349952	-0.00372064	0.000128989	0.000238217	5.3936e-06	0.000685849	0.000383489	3.73449e-05	0.000596876	0.000598772	0.000200534	0.00137949	0.00359893	0.000861403	0.000841534	0.000159321	0.014465	9.98156e-08	0.694021	0.945141	0.887121	0.21603	0.799742	0.301222	0.880968	0.77712	0.972994
calcium-rs8068318	T	C	0.00383373	-0.000135327	0.000176624	-1.20293e-05	0.00115255	8.68259e-05	0.000450481	-0.00143434	0.000647725	0.000799429	0.000703113	-0.000210016	0.000753317	0.000384425	3.8525e-05	0.000615555	0.0006175	0.000206656	0.00143053	0.00384096	0.000891489	0.00087309	0.000163951	0.857434	0.645912	0.754853	0.0611555	0.888179	0.0292688	0.316022	0.866083	0.369862	0.420639	0.200207
calcium-rs8092112	G	T	0.000979961	0.000459347	-0.000340686	2.91446e-05	0.000195009	-0.000284426	7.02038e-06	-0.00182196	0.00412715	0.000680935	0.000921157	-0.000113568	0.000497178	0.000412326	3.4581e-05	0.000552149	0.000553584	0.000185751	0.0012886	0.00337448	0.000803125	0.000781868	0.000146971	0.355535	0.408661	0.399346	0.723952	0.607399	0.969852	0.157392	0.221314	0.396519	0.238739	0.439688
calcium-rs838718	G	A	0.00316397	-0.00101454	0.00130743	3.153e-05	0.000603175	0.000442452	-1.78229e-05	-0.000688605	-0.00059118	0.00116612	0.0010833	-7.50789e-05	0.00045845	0.000437431	3.41835e-05	0.000545371	0.000546949	0.000183104	0.00126742	0.00330798	0.000789482	0.000771492	0.000145828	0.0269005	0.00280041	0.356335	0.268732	0.418547	0.922458	0.586915	0.858163	0.139658	0.160275	0.606662
calcium-rs838737	A	G	0.00345454	0.00224782	-0.00134917	-1.96927e-05	-0.00054122	0.000117085	-7.6574e-05	-0.000107338	0.0052791	-0.00114858	-0.000463258	1.79219e-05	0.00048849	0.000413945	3.41756e-05	0.00054591	0.000547328	0.000182919	0.00126119	0.00336824	0.000789963	0.000772489	0.000146778	4.19535e-06	0.00111708	0.564467	0.321486	0.830609	0.675493	0.932175	0.117042	0.145958	0.54871	0.902818
calcium-rs841572	G	A	0.0056834	0.00028128	0.000754578	-1.1853e-05	-9.89821e-05	-0.000223136	-0.000129021	0.000450308	-0.000622549	-0.000800574	-0.000171554	4.10549e-05	0.000518255	0.000403584	3.47197e-05	0.000554676	0.000556232	0.000186203	0.00128638	0.00341336	0.000801183	0.000783316	0.000147873	0.587306	0.0615278	0.732809	0.858369	0.688305	0.488371	0.726295	0.85528	0.31768	0.826643	0.781291
calcium-rs9267833	T	C	0.00515138	-0.000514874	-0.000565432	-6.09017e-05	-0.00137472	-7.69609e-05	-3.30413e-05	-0.00259491	-0.000718039	-0.00168809	-0.00225576	-0.000381497	0.000863331	0.000391933	4.05672e-05	0.000646653	0.000648759	0.000217577	0.00149799	0.00404968	0.000934221	0.000912515	0.000172871	0.550922	0.149114	0.133291	0.0335125	0.90557	0.879297	0.0832282	0.859267	0.0707718	0.0134361	0.0273281
calcium-rs927412	A	T	0.000529907	-0.000940582	8.48174e-05	0.000129937	-0.000273486	-0.000647827	-0.00057475	0.00316229	0.00830716	0.00104754	0.000838974	0.000866842	0.00507409	0.000588683	7.26638e-05	0.00115761	0.00116179	0.000387311	0.0026981	0.00735296	0.0016789	0.00163067	0.000309315	0.852939	0.885438	0.0737461	0.813238	0.577112	0.137824	0.241181	0.258574	0.532666	0.606907	0.00507227
calcium-rs928760	C	T	0.0579124	-0.000315265	-0.000381928	9.33229e-06	-0.000604804	1.77415e-05	-0.000176826	0.000437819	0.000521803	-0.000521684	-0.000407781	-0.00012798	0.000664509	0.000383489	3.69915e-05	0.000591138	0.000592601	0.000198112	0.00136885	0.00358771	0.000851486	0.000832404	0.000156326	0.635191	0.319285	0.800823	0.306253	0.976116	0.372097	0.749087	0.884362	0.540093	0.624217	0.412975
calcium-rs9321013	G	A	0.00196822	0.000916728	-0.000129704	0.000119109	-0.000958648	0.000704716	-0.00039993	0.000840998	-0.00269207	0.000171234	0.00120602	6.11379e-05	0.00064965	0.000383628	3.67522e-05	0.000586627	0.000588265	0.000197204	0.00137979	0.00362743	0.000850623	0.000829124	0.000157305	0.158213	0.735289	0.00119183	0.102224	0.230936	0.0425616	0.542186	0.458001	0.840461	0.145789	0.69753
calcium-rs9356996	A	C	0.00475602	-0.000413503	0.00063612	6.21382e-05	0.000169476	0.000565156	6.96285e-05	0.00166367	0.00822844	0.000994417	0.000629175	-6.74458e-05	0.000502322	0.000404682	3.43639e-05	0.000548457	0.000550131	0.000184208	0.00127466	0.00328647	0.000792782	0.00077583	0.000145814	0.410405	0.115975	0.0705706	0.757317	0.304275	0.70544	0.191832	0.0122897	0.209721	0.417384	0.64369
calcium-rs9379881	C	T	1	-0.000119208	9.18589e-05	-3.81432e-05	0.00136186	-0.000360181	0.000201844	0.00156515	0.000419918	4.96895e-05	-0.000502945	-0.00020924	0.000445072	0.000442377	3.41742e-05	0.000544356	0.000546096	0.000183196	0.00128533	0.00348468	0.000786601	0.00076973	0.00014561	0.788822	0.835504	0.264364	0.0123577	0.509539	0.270555	0.223339	0.904084	0.949631	0.513496	0.150725
calcium-rs9420589	G	T	0.00443356	0.000100588	0.000535521	1.76673e-05	0.000565139	-0.000433646	-6.33135e-07	0.00103994	-0.000568637	0.00102005	0.000327544	-7.04817e-05	0.000492071	0.000412409	3.44617e-05	0.00054976	0.000551428	0.000184902	0.00129334	0.00341713	0.000797945	0.000779051	0.000146193	0.838027	0.194111	0.608186	0.303963	0.431631	0.997268	0.421356	0.867836	0.201128	0.674165	0.629725
calcium-rs9806062	T	G	0.00101551	-0.00154697	0.000211465	2.38079e-05	-0.00092917	-0.000785333	-0.000406842	0.00219347	-0.00419469	0.000235191	0.000688481	-0.000130845	0.00175925	0.00047284	5.43753e-05	0.000868946	0.000870718	0.000291778	0.00203194	0.00527476	0.00125947	0.00122553	0.000229686	0.379219	0.654714	0.6615	0.284933	0.367091	0.163211	0.280368	0.426476	0.851867	0.574266	0.568905
calcium-rs9875338	G	A	0.00691414	0.000242114	0.000378304	6.22002e-05	0.000879389	5.22919e-05	-8.33326e-06	0.00153029	0.00690355	0.00126627	0.000876385	0.000357066	0.000522242	0.00039981	3.466e-05	0.000553446	0.000555124	0.000185867	0.0013088	0.00344727	0.00080223	0.000782235	0.000148157	0.642931	0.344042	0.0727218	0.112077	0.924952	0.964239	0.242314	0.04522	0.114468	0.262562	0.0159521
calcium-rs9897309	A	G	0.00137265	-0.000445931	2.9087e-05	-3.32448e-05	-0.000385614	9.81732e-05	0.000174376	0.000654985	0.00104071	-0.00115356	-0.000452999	-0.000128291	0.000457805	0.000429574	3.40121e-05	0.000543246	0.000545075	0.000182661	0.00126192	0.00333505	0.000783219	0.000766354	0.000145363	0.330025	0.946016	0.328352	0.477808	0.857067	0.33976	0.603735	0.755002	0.140796	0.554448	0.377479
FFR-10:65350279_AT_A	A	AT	0.00553648	-0.00017615	-0.000106915	-2.60033e-05	-0.000723565	8.57006e-05	-0.000252517	-0.00061523	0.00228857	-0.000122574	-0.00041325	-7.54561e-05	0.000339862	0.000319111	2.53273e-05	0.000403425	0.000401692	0.0001373	0.000974116	0.0026491	0.000562728	0.000548504	0.000112067	0.604251	0.737596	0.304568	0.072886	0.831055	0.0658925	0.527663	0.387641	0.827569	0.451203	0.500751
FFR-12:1465365_CA_C	CA	C	0.00591996	0.00276368	8.0336e-05	-2.04437e-05	-4.78121e-05	-0.000466958	-0.000235045	0.00168105	0.0106066	-0.00141065	0.000255807	0.000439139	0.00161546	0.000381152	4.49281e-05	0.000711456	0.000708151	0.000242517	0.00170165	0.00458705	0.000990802	0.000960544	0.00019839	0.0871252	0.833065	0.649087	0.94642	0.509636	0.33245	0.323205	0.0207623	0.154521	0.789998	0.0268648
FFR-15:48912072_TA_T	TA	T	0.0461759	-0.00107548	-2.80232e-05	-5.08023e-06	0.00110738	-0.000281001	-4.71793e-05	0.00147502	-0.00164106	0.00110239	-9.01236e-05	0.000136596	0.00103174	0.000323398	3.63789e-05	0.000579669	0.000577099	0.000197544	0.00142281	0.00385656	0.000806574	0.000788512	0.00016433	0.29723	0.930948	0.888939	0.0560885	0.626315	0.811238	0.29988	0.670456	0.171703	0.909004	0.405847
FFR-15:51051083_ATATCTATCTATC_A	ATATCTATCTATC	A	0.00822081	-0.000685697	-5.22618e-05	-1.40164e-05	2.82467e-05	0.000358911	-0.000197335	-0.00102364	-0.00245085	0.00072024	0.000934462	-0.000104412	0.000854568	0.000306827	3.38012e-05	0.000536063	0.000533899	0.000183223	0.00130566	0.00345926	0.000750636	0.000733791	0.000148063	0.422329	0.864751	0.678384	0.957977	0.501429	0.281474	0.433042	0.478641	0.337306	0.202854	0.480695
FFR-16:67482196_AG_A	AG	A	0.00108141	0.00179319	0.000323759	-5.70537e-05	-0.00120724	-0.00163851	-0.000357674	-0.00449311	0.0029675	-0.00317629	-0.00203541	-0.00036715	0.00185345	0.000397234	4.7214e-05	0.000749568	0.000745607	0.000255388	0.00186936	0.00501686	0.00104627	0.00102427	0.000210575	0.333302	0.415054	0.226893	0.107274	0.0279824	0.161362	0.0162376	0.554182	0.0023994	0.0469049	0.081239
FFR-17:2026417_GA_G	G	GA	0.0859323	0.00018272	0.000410771	-2.03932e-06	-0.00067894	4.05376e-05	-0.000254644	0.00187938	0.00116722	0.000469988	0.00115237	-2.09296e-05	0.000470083	0.000283194	2.71244e-05	0.000429592	0.000427932	0.000146088	0.00103158	0.00283574	0.000599532	0.000586675	0.000118894	0.6975	0.146923	0.940069	0.11401	0.92453	0.0813201	0.0684791	0.680626	0.433086	0.0495059	0.860266
FFR-20:43977066_GC_G	GC	G	0.00808649	-0.0010271	-3.06163e-05	5.1348e-05	0.000141352	0.000368397	0.000153482	0.00072545	-0.00855458	-0.000552134	0.000315299	-0.000111749	0.00113786	0.000332325	3.78637e-05	0.00060288	0.000600582	0.000205486	0.00148105	0.00418922	0.000843183	0.000821484	0.000167773	0.36671	0.926597	0.175061	0.814627	0.539613	0.455111	0.624262	0.0411484	0.512584	0.701115	0.505367
FFR-22:31279756_AGAGGGATACCGTCCCCCTG_A	AGAGGGATACCGTCCCCCTG	A	0.00757026	0.000158757	-7.12681e-05	-2.00505e-05	-0.000435211	-8.94662e-05	-0.000124058	-0.00121082	0.00129483	-0.000444765	-0.000277404	-0.000323395	0.000486959	0.000287361	2.76604e-05	0.000439223	0.000437153	0.000149515	0.00106113	0.00285183	0.000614239	0.000600472	0.000122509	0.744412	0.804128	0.468527	0.321752	0.837841	0.406686	0.253843	0.649804	0.469011	0.644098	0.00829764
FFR-4:124735247_AT_A	AT	A	0.00460463	0.00109972	0.000164005	-2.68066e-05	-4.0902e-05	-0.00044319	-0.000324571	-0.00251315	0.0048384	0.000637992	0.00100545	-0.000368092	0.00108592	0.000328162	3.71629e-05	0.000591849	0.000589646	0.0002025	0.00143698	0.00383945	0.000821777	0.000810656	0.000165309	0.311204	0.617238	0.47071	0.944903	0.452281	0.108976	0.080307	0.207606	0.43754	0.214871	0.0259701
FFR-5:176527039_TCCTC_T	TCCTC	T	0.0162246	-0.000610158	-0.000456442	2.49226e-05	0.000670991	-0.000546109	0.000205058	0.000337965	-1.25469e-05	0.000496107	6.4917e-05	4.51454e-05	0.000525183	0.000299319	2.92493e-05	0.00046344	0.000461354	0.000157348	0.00112366	0.00308972	0.00064487	0.000630843	0.000128472	0.245318	0.127277	0.394173	0.147661	0.23653	0.192503	0.763589	0.99676	0.441709	0.918038	0.725288
FFR-6:7113368_CGGGGACT_C	C	CGGGGACT	0.039674	-0.000176866	-0.000402302	3.40787e-05	0.00037446	-0.000465904	4.373e-05	0.00132801	-0.00632788	0.000315786	1.27006e-05	-0.000215589	0.000353848	0.000306086	2.5303e-05	0.000402034	0.000400319	0.000137117	0.000963962	0.00265477	0.000560523	0.000547207	0.000112303	0.61719	0.188732	0.178038	0.35164	0.244494	0.749784	0.16831	0.0171456	0.573179	0.981483	0.0548978
FFR-7:7256609_GAC_G	GAC	G	0.00894338	-0.00012926	-4.64439e-05	-1.64674e-05	0.000725301	-0.000144536	8.04092e-05	0.000924746	0.0022746	0.000727246	0.000345697	0.000259405	0.00037843	0.000297599	2.57014e-05	0.000407944	0.000406229	0.000139039	0.000983429	0.00270015	0.000567175	0.000554861	0.00011326	0.732676	0.875984	0.521705	0.0754149	0.72199	0.563047	0.347051	0.399566	0.199766	0.533264	0.0220032
FFR-9:4143564_CAA_C	CAA	C	0.0041196	-0.000199448	-0.000491451	9.30302e-06	0.000164952	0.000794904	1.49986e-05	-0.00171136	-0.00679601	-0.000561206	-0.000267183	0.000104722	0.000370967	0.000300445	2.56243e-05	0.00040618	0.000404565	0.000138349	0.000981459	0.00269259	0.000565646	0.000553068	0.000113149	0.590823	0.101895	0.716565	0.684665	0.0494348	0.91367	0.0812156	0.0116048	0.321126	0.629031	0.354695
FFR-rs10037493	C	T	0.0368777	-0.000138466	0.000435501	-4.28802e-07	-0.000532462	-0.00117674	7.7969e-05	0.00115852	0.000473477	0.000156709	-0.00100823	-0.000122982	0.000352884	0.000305651	2.50844e-05	0.000399364	0.000397727	0.000136488	0.000967393	0.00265566	0.00055768	0.000544211	0.000110486	0.694774	0.154208	0.986361	0.182444	0.00309018	0.567831	0.231085	0.858496	0.778709	0.0639364	0.265668
FFR-rs10059996	G	T	0.127976	0.000928759	-0.000146415	9.22408e-06	-4.99327e-05	-0.00064988	-0.000366397	-3.26391e-06	-0.00371276	0.000685925	-0.000366804	2.70404e-06	0.000453041	0.000298129	2.75639e-05	0.000438348	0.00043635	0.000149619	0.00105881	0.00287046	0.000612424	0.000598056	0.000122946	0.0403605	0.623347	0.737895	0.909308	0.136396	0.0143314	0.99754	0.195862	0.262709	0.539661	0.982453
FFR-rs1009908	T	C	0.00320088	-5.21666e-05	5.65924e-05	-5.12825e-05	-0.000312018	6.34936e-05	4.25603e-05	0.000683874	0.000250848	0.000841166	0.000715489	5.64592e-05	0.000839737	0.000304722	3.33978e-05	0.000531335	0.000528685	0.000180979	0.00128059	0.00355165	0.000739994	0.000725465	0.000147398	0.950465	0.852666	0.124661	0.557048	0.904406	0.814079	0.593322	0.943693	0.255658	0.324013	0.701692
FFR-rs10102857	T	C	0.0226859	0.000568881	-0.000163596	4.26688e-05	0.000106899	0.000716507	0.000203545	0.000791221	-0.0043517	0.000985553	-0.000390885	-0.00017861	0.0008359	0.000302824	3.3171e-05	0.0005284	0.000526368	0.000180807	0.00127237	0.0035123	0.000739947	0.000722892	0.000146494	0.49615	0.589035	0.19833	0.839676	0.173443	0.260268	0.534042	0.215351	0.182888	0.588699	0.222757
FFR-rs10137684	G	A	0.000788793	0.000809914	0.000111265	5.54248e-05	0.000331741	-8.17836e-06	-0.000315407	-0.00251612	-0.00195046	0.00165103	-0.000196727	0.000102161	0.00123063	0.000343427	3.9365e-05	0.000627278	0.000624387	0.000214975	0.00155125	0.00418311	0.000875216	0.00085668	0.000174697	0.510455	0.745951	0.159141	0.596905	0.989549	0.142327	0.104805	0.641023	0.0592395	0.818373	0.55869
FFR-rs10149267	C	T	0.000697556	0.00028933	-0.000211905	4.69487e-05	-1.90272e-05	0.000279177	-0.000284551	0.000779096	-0.000413854	-0.000426189	-0.000133348	-5.37039e-05	0.000516462	0.000282079	2.78421e-05	0.000442174	0.000440281	0.000150536	0.00107184	0.00279528	0.000617881	0.000605344	0.000123749	0.575334	0.452519	0.0917493	0.965677	0.526024	0.0587255	0.467303	0.8823	0.490347	0.82565	0.664309
FFR-rs10173269	T	G	0.0156904	-0.000278516	-3.01468e-05	-1.39229e-05	-7.2591e-05	-0.000192204	1.75412e-05	0.00151703	-0.00333845	0.000964951	0.000881465	9.88641e-05	0.000342508	0.000309513	2.51091e-05	0.000398734	0.000396892	0.00013611	0.000967153	0.00266267	0.000554418	0.000542124	0.000111662	0.416124	0.922408	0.579239	0.855541	0.628193	0.897456	0.116754	0.209918	0.0817778	0.103964	0.375949
FFR-rs10178728	T	A	0.0063019	0.000572743	0.00025124	1.3304e-05	-1.03003e-05	0.000109099	0.000137876	0.000774541	0.0040711	-0.000112203	0.000170763	0.000299844	0.000863446	0.000306436	3.3736e-05	0.00053691	0.000534115	0.000183314	0.00129903	0.00350911	0.000746606	0.000728022	0.000148724	0.507125	0.412287	0.693318	0.984694	0.83815	0.451973	0.551012	0.245989	0.880541	0.814553	0.0437902
FFR-rs10420976	G	T	0.00669148	-0.000184905	-0.000445621	-3.68737e-05	0.000434646	1.94036e-05	0.000219897	-0.000873058	0.00166727	-0.000417917	0.000181614	5.13398e-05	0.000365474	0.000299267	2.53775e-05	0.000403347	0.000401545	0.000137182	0.000963475	0.00260974	0.000560365	0.000549768	0.000111567	0.612906	0.136477	0.146224	0.281214	0.961459	0.108944	0.364855	0.522911	0.455794	0.741138	0.645395
FFR-rs10488765	A	G	0.0171414	0.00152662	4.20962e-05	-2.45142e-05	0.00195142	0.000959719	5.8956e-05	-0.00330871	-0.0049348	0.00075591	-0.000161962	0.000254696	0.00196074	0.000408714	4.84648e-05	0.000772957	0.000770039	0.000264051	0.00185597	0.00471472	0.00108939	0.00105864	0.000213718	0.436219	0.917966	0.612987	0.0115831	0.212647	0.823322	0.0746299	0.295249	0.487755	0.878406	0.233366
FFR-rs1059046	T	G	0.623753	-0.000719304	-0.000296924	8.70742e-06	0.000129044	0.000377766	-0.00013158	0.00131336	-6.78398e-06	0.000391254	0.000526141	0.000103904	0.000414048	0.000286759	2.60877e-05	0.000413727	0.000412015	0.00014085	0.00099684	0.00275921	0.00057758	0.000564541	0.000115935	0.0823452	0.300461	0.73855	0.755113	0.359209	0.35021	0.187664	0.998038	0.498153	0.351348	0.370133
FFR-rs1061837	G	A	0.00373517	0.000121581	-8.98887e-05	1.44215e-06	0.000969813	-0.000378367	-1.16357e-06	0.000249381	-0.000188097	-0.000421967	-0.000213835	-2.76881e-05	0.000335759	0.000313799	2.50359e-05	0.000397637	0.000395832	0.000135708	0.000970188	0.00266184	0.000554045	0.000541924	0.000110658	0.717271	0.774531	0.954065	0.0147312	0.339135	0.993159	0.797145	0.943665	0.446293	0.69315	0.802422
FFR-rs10624296	TTTTG	T	0.0010201	-0.00010466	9.04242e-05	1.84261e-05	-0.000414353	-0.000439929	1.11874e-05	1.43927e-05	-0.00373717	-0.00015761	-3.0193e-05	8.76642e-05	0.000359337	0.000301627	2.5248e-05	0.00040171	0.000400041	0.000136904	0.000972388	0.00261199	0.000561345	0.000548009	0.000111381	0.770854	0.764339	0.465509	0.30232	0.271459	0.934872	0.988191	0.152496	0.778886	0.956062	0.431246
FFR-rs10679701	CATACTT	C	0.00738741	-0.000526204	3.09679e-05	2.79199e-05	0.000575988	0.00134909	0.000100269	0.000394288	-0.00111788	0.000328819	0.000187182	0.000145188	0.000703102	0.000296332	3.13093e-05	0.000499297	0.000497047	0.000169658	0.00121049	0.00318444	0.000692144	0.000677045	0.000137941	0.454218	0.916769	0.372531	0.248666	0.00664408	0.554515	0.744633	0.725556	0.634735	0.782189	0.292558
FFR-rs10750866	A	G	0.00123641	0.000100284	-0.000413338	1.52041e-05	0.000867792	0.000389758	4.25646e-06	0.000265799	0.00211229	0.00118124	-0.000357634	9.73732e-05	0.000549656	0.000283843	2.84233e-05	0.000452699	0.000450589	0.000154067	0.00109075	0.0028603	0.000632059	0.000615912	0.000125274	0.855231	0.145333	0.592709	0.0552487	0.387041	0.977959	0.807476	0.46022	0.0616436	0.561473	0.436993
FFR-rs10835346	T	A	0.00360492	-0.000834241	-4.35602e-05	2.85771e-05	-0.00055212	0.000229114	0.000138735	1.64163e-05	-0.000499678	-0.00108663	-0.000643393	-0.000257142	0.000489953	0.000283063	2.75073e-05	0.000435945	0.000434033	0.000148628	0.00104804	0.00287634	0.00060726	0.000593838	0.000120862	0.0886269	0.877698	0.298858	0.20534	0.597588	0.350595	0.987503	0.862086	0.0735524	0.278612	0.0333752
FFR-rs10852990	G	A	0.00115124	0.000763079	0.000230054	3.64238e-05	0.000526756	-0.000248592	0.000151361	-0.00200368	-0.00272581	0.000764282	-2.38085e-05	9.25146e-05	0.000471514	0.000282139	2.70267e-05	0.000429008	0.000427365	0.000146345	0.00104835	0.0028122	0.000598302	0.000585796	0.000120102	0.105587	0.414849	0.177758	0.219505	0.56078	0.301007	0.0559715	0.332406	0.201457	0.96758	0.441124
FFR-rs10873301	G	T	0.00504901	0.000156723	-7.78407e-05	-3.37921e-05	0.000850272	0.000280519	-2.7366e-05	-0.000464854	-0.00272542	-0.000132653	0.000100059	2.22724e-05	0.000489302	0.000283505	2.74465e-05	0.000436275	0.000434402	0.000148872	0.00105652	0.00289721	0.000605961	0.000596551	0.000121822	0.748742	0.783651	0.21825	0.0513047	0.518435	0.854153	0.659948	0.346857	0.826718	0.866796	0.854934
FFR-rs10919610	A	T	0.00161883	0.000215928	2.31854e-05	1.34019e-05	-0.000248166	-0.000541787	-3.43106e-05	-0.000169195	-0.000765761	-0.000499436	-0.000784904	-0.000151526	0.000403069	0.000292678	2.61009e-05	0.000414558	0.000412574	0.000141244	0.0010086	0.00278522	0.000577116	0.000566129	0.000115919	0.59216	0.936859	0.607627	0.549422	0.189121	0.808069	0.866778	0.783364	0.386821	0.165615	0.191158
FFR-rs10965936	G	A	0.0175708	0.000324969	0.000463597	-1.48727e-05	-0.000153554	-8.63209e-05	-9.38457e-06	-0.0011969	-0.00128977	0.000466343	-0.000705059	0.000144101	0.000371725	0.000301078	2.5645e-05	0.000407108	0.000405275	0.00013876	0.00098267	0.00260519	0.000566817	0.000556567	0.00011253	0.382	0.123614	0.561952	0.706039	0.831332	0.946079	0.223222	0.620546	0.410657	0.205229	0.200356
FFR-rs10983184	T	C	0.0810663	-0.000108409	-4.6935e-05	1.10408e-05	-0.000706346	0.000350765	-2.02985e-05	-0.000671332	-0.00259532	-0.000541013	-0.00101116	-6.60692e-06	0.000422725	0.000288079	2.63358e-05	0.000418137	0.00041629	0.000142913	0.00101211	0.00277277	0.000582683	0.000569608	0.000116655	0.797602	0.870578	0.675046	0.0911698	0.399454	0.887053	0.507141	0.349273	0.353158	0.0758692	0.954835
FFR-rs11022690	T	C	0.00587698	-0.000263153	0.000101991	3.65914e-05	-0.00010718	-0.0005835	-0.000117314	-0.000499204	-0.00276758	0.000324892	-0.000247632	-0.000176852	0.00034661	0.000307605	2.51038e-05	0.000399492	0.00039757	0.00013627	0.000967944	0.0025634	0.000555237	0.000542724	0.000111501	0.447721	0.74022	0.144952	0.788477	0.142197	0.389296	0.606039	0.280298	0.558454	0.648193	0.112719
FFR-rs11209113	T	C	0.0326745	0.000175896	0.000394012	-1.32967e-06	-0.000114653	0.000345444	0.000147672	-0.000849185	0.000913382	-0.000201946	-0.000940848	0.000134085	0.000542837	0.000285228	2.84429e-05	0.000452669	0.000450751	0.00015413	0.0010977	0.00290213	0.000629595	0.000615942	0.000125314	0.745914	0.167159	0.962714	0.80005	0.443455	0.338015	0.439168	0.752968	0.748397	0.126641	0.284626
FFR-rs112184198	G	A	0.0636181	-0.0007305	0.000156461	-3.09395e-05	-0.000211828	0.000690978	0.000316485	0.00206635	0.00682043	-0.000830516	0.000979638	6.44186e-05	0.00138324	0.000356001	4.14259e-05	0.000658103	0.000654953	0.000223366	0.00156979	0.00439933	0.000917077	0.000904471	0.000181088	0.597425	0.660302	0.455146	0.747547	0.291424	0.156517	0.188068	0.121063	0.365143	0.278764	0.722044
FFR-rs11280610	A	AGGTTTCT	0.00757684	-6.801e-05	-0.000254195	9.14479e-05	-0.00069729	0.000931484	-0.000274757	0.002158	0.00850799	1.98562e-06	0.000676321	9.12347e-05	0.0010388	0.000324413	3.6644e-05	0.000582136	0.000579605	0.000197636	0.00140388	0.00348871	0.000811668	0.00079611	0.000163227	0.9478	0.433303	0.0125762	0.230992	0.108034	0.164464	0.124254	0.0147404	0.998048	0.395587	0.576202
FFR-rs112990608	G	C	0.000807561	-0.00151728	0.000258832	-0.000131216	0.000470712	0.000520444	0.000315413	-0.000119762	0.00241868	0.000332029	-0.00086225	0.000540407	0.00198254	0.000408842	4.8874e-05	0.000774663	0.000770641	0.000264106	0.00187336	0.00540103	0.00107701	0.00105228	0.000212835	0.444083	0.526678	0.00725815	0.543431	0.499461	0.232375	0.949027	0.654286	0.757864	0.412555	0.0111156
FFR-rs113745635	C	T	0.00150933	-0.000291489	-0.000130797	-8.16967e-06	0.0011924	-0.000424436	-0.000197981	-0.000231985	-0.00260741	0.00126332	0.00024293	-1.04292e-05	0.000670114	0.000289465	3.0498e-05	0.000484548	0.000482456	0.00016514	0.00116812	0.00309706	0.000672684	0.000660559	0.000134755	0.663574	0.651374	0.788796	0.0138615	0.379001	0.230582	0.842578	0.399847	0.06038	0.71305	0.93831
FFR-rs11423823	C	CT	0.0196826	-0.00043247	-0.000283716	5.85861e-05	-0.000133059	-0.000199568	-0.000126815	0.00282593	0.00071355	0.000924322	0.00121152	-3.90872e-05	0.00034305	0.000340789	2.64247e-05	0.000418979	0.000417187	0.000142509	0.00100785	0.00270775	0.000581789	0.000569853	0.000115764	0.207432	0.405112	0.0266179	0.750805	0.632391	0.373532	0.00504906	0.792149	0.112118	0.0335042	0.735631
FFR-rs11594905	G	A	0.0038388	0.000316875	-0.000162104	2.25435e-05	0.00138946	0.00147971	-6.94177e-05	-0.000557072	-0.00285611	-0.000188164	0.000672551	-4.54533e-05	0.00103396	0.000322216	3.62228e-05	0.000577993	0.000575532	0.000196589	0.00139208	0.00380708	0.000806833	0.000791243	0.000162212	0.759248	0.6149	0.533708	0.0162205	0.0101405	0.724005	0.68903	0.453129	0.815596	0.395331	0.779317
FFR-rs115981387	A	G	0.193516	0.00153096	-0.000412625	6.03659e-06	0.00197908	0.00184354	2.58284e-05	-0.00107849	-0.00258809	0.00312386	0.00194155	-0.000111188	0.00182608	0.000398995	4.72484e-05	0.000751123	0.000747111	0.000256318	0.00181255	0.00473182	0.001047	0.00101898	0.000211596	0.401813	0.301062	0.898337	0.00841852	0.0136046	0.919736	0.551836	0.58441	0.00284906	0.0567329	0.599255
FFR-rs11607392	T	C	0.425638	-0.000149787	-0.000252445	2.04735e-05	0.000222776	-0.00042641	0.000179954	-0.000526782	-0.00459125	0.00176817	0.00160288	-9.8928e-05	0.00110823	0.000329011	3.74705e-05	0.000595011	0.000592438	0.000202583	0.00141941	0.00400514	0.000826241	0.000810392	0.000164193	0.892486	0.442914	0.584799	0.708102	0.471677	0.374383	0.710543	0.251655	0.0323551	0.0479413	0.546837
FFR-rs11648508	T	G	0.0639946	0.00024552	-0.000159616	2.78895e-05	0.000228165	0.000882526	0.000127894	-0.000740454	-0.00112201	0.000799565	-0.000136794	-4.48817e-05	0.000471875	0.000284029	2.71223e-05	0.000430815	0.000428854	0.000146926	0.00104651	0.00287522	0.000601049	0.000587126	0.000119958	0.60285	0.574137	0.303817	0.596382	0.0396038	0.384046	0.47923	0.696363	0.183428	0.81577	0.708297
FFR-rs11657101	G	A	0.0193791	0.000173473	0.000156307	1.70017e-05	-4.6257e-05	-0.000116155	4.02999e-05	-0.000838345	0.00152786	-0.000902211	-0.00114118	-0.000184785	0.000421256	0.000288445	2.62683e-05	0.000417781	0.000416079	0.00014233	0.00100628	0.00270894	0.000580106	0.00056911	0.000116956	0.680487	0.587892	0.517482	0.911838	0.780118	0.777067	0.404781	0.572751	0.119889	0.0449438	0.114122
FFR-rs11746606	C	T	0.00500075	0.000990233	-0.00116432	-5.38812e-05	-0.000330103	0.00108999	0.000288362	0.00227446	-0.00233353	-0.00120405	0.000132408	6.76105e-05	0.00130806	0.000351055	4.06197e-05	0.000642668	0.000639615	0.000219563	0.00157817	0.00412877	0.000899503	0.000877302	0.000180919	0.449038	0.000911226	0.184683	0.607501	0.0883583	0.189069	0.149529	0.571948	0.180711	0.880034	0.708624
FFR-rs11759102	C	T	0.490371	-0.000448018	5.95485e-05	-5.07745e-05	-0.0011004	-0.000573068	4.00684e-05	0.000216933	-0.00187086	-0.000724392	-0.00123021	-0.000352038	0.00090455	0.000310507	3.44867e-05	0.000547703	0.000545439	0.00018668	0.00132413	0.00353909	0.000763304	0.000748117	0.000153262	0.620393	0.847916	0.140943	0.0445254	0.293418	0.830051	0.869865	0.597064	0.342612	0.100095	0.0216228
FFR-rs11852372	A	C	0.0178047	0.000443575	-0.000143799	5.41317e-05	0.00126768	0.00355904	7.14866e-05	-0.000656726	0.00348356	0.00189899	0.00152352	0.000279479	0.000452242	0.000284252	2.6775e-05	0.000425343	0.000423592	0.000145462	0.00102358	0.00284508	0.00059262	0.000580146	0.000118828	0.326675	0.612938	0.043206	0.00287941	4.41763e-17	0.623112	0.521135	0.220797	0.00135385	0.00863797	0.0186761
FFR-rs1192415	A	G	0.0174464	0.000280374	-0.000163285	2.86208e-05	4.37694e-05	-0.00024832	1.17669e-05	0.00173399	0.00286224	-0.0012136	-0.00168475	-0.000277832	0.0007589	0.000296782	3.19639e-05	0.000508288	0.000505907	0.000173243	0.00124137	0.00340714	0.000706349	0.000688396	0.000141459	0.711794	0.582192	0.37057	0.931378	0.62354	0.945848	0.162466	0.40087	0.0857745	0.0143921	0.0495264
FFR-rs12040241	T	C	0.00723637	0.00011957	2.57615e-05	1.11396e-05	0.000136156	-0.000100118	-0.000105197	-0.00122508	-0.00388117	-0.000262857	0.000225691	0.000206737	0.000398986	0.000288664	2.5762e-05	0.000409296	0.000407211	0.00013948	0.000994139	0.0026715	0.000570207	0.000557617	0.000113859	0.764418	0.928888	0.665448	0.739392	0.805789	0.450724	0.217838	0.14628	0.64481	0.685668	0.0694148
FFR-rs12074324	C	T	0.0255929	-0.00290353	0.000402618	-3.48366e-05	-0.000399287	0.000644312	0.000169447	-0.00130911	-0.00911645	-0.00115839	-0.0016874	3.09941e-05	0.00191877	0.000403946	4.80672e-05	0.000763847	0.00076067	0.000260329	0.00185681	0.00520411	0.00105743	0.00104076	0.000211066	0.130224	0.318906	0.468607	0.601162	0.396978	0.515115	0.480792	0.0798133	0.273311	0.104953	0.883254
FFR-rs12090950	A	G	0.00169842	6.54887e-05	0.000286574	-1.58914e-05	-0.000387487	-0.000161688	-3.11669e-05	-0.00213054	-0.0052579	-8.96418e-05	-0.000737547	8.12185e-05	0.000348815	0.000305284	2.5128e-05	0.000398832	0.00039703	0.000136125	0.000955859	0.00262636	0.000555023	0.000543414	0.000111148	0.851076	0.34788	0.527116	0.331274	0.683829	0.818902	0.0258202	0.045289	0.871692	0.174705	0.464949
FFR-rs12143901	C	T	0.0041888	-0.000647609	0.000403446	1.80999e-05	-0.00013783	-0.000461436	-3.98603e-05	-0.000760273	-0.00246135	0.000122932	0.000123376	-7.34584e-06	0.000395548	0.000289716	2.57097e-05	0.000408893	0.000407026	0.000139278	0.000981575	0.00269214	0.000569198	0.000557836	0.000113848	0.101581	0.163756	0.481426	0.736057	0.256932	0.774732	0.43861	0.360576	0.829008	0.824961	0.948554
FFR-rs12221230	T	C	0.00387688	0.00100608	0.000144903	4.16605e-05	-0.000442234	0.00037319	3.78397e-05	-0.00218382	-9.7244e-05	-7.28451e-05	-0.000808346	-0.000269539	0.000752419	0.000295203	3.18158e-05	0.000506108	0.000503924	0.000172577	0.00123955	0.00337949	0.000705962	0.000691513	0.000139327	0.181181	0.623525	0.19039	0.382231	0.458957	0.826446	0.0781059	0.977044	0.917816	0.242425	0.0530447
FFR-rs12224858	G	A	0.00143255	-0.000447378	4.65477e-05	-6.74248e-06	-0.0008281	-3.87276e-05	0.000417649	-0.000554301	0.00468511	-2.1107e-05	-0.00170604	6.81666e-05	0.00259248	0.000456441	5.50163e-05	0.000877401	0.000873725	0.000300574	0.00214655	0.0061479	0.00122003	0.00119189	0.000242249	0.862991	0.918773	0.90246	0.345268	0.964646	0.164681	0.796231	0.446021	0.986197	0.152328	0.778412
FFR-rs12334644	C	T	0.000356583	-0.000452772	-0.000166195	1.3593e-05	9.48404e-05	0.00101787	-3.92717e-05	-0.00152723	-0.00126809	-0.000263893	-0.000296408	-4.02633e-05	0.000338868	0.000312897	2.50763e-05	0.000398819	0.000397127	0.000135867	0.000961512	0.00265456	0.000554919	0.000542915	0.000111105	0.181508	0.595317	0.587773	0.812034	0.010375	0.772547	0.112206	0.632863	0.634394	0.585097	0.717062
FFR-rs1233556	C	T	0.00975484	-0.00084932	0.000170086	1.36066e-05	5.8257e-05	0.000256352	-0.000242347	0.000108994	-0.0034537	0.00033098	-0.000100925	0.000160511	0.000991122	0.000323843	3.62064e-05	0.000576553	0.000574093	0.000196407	0.00138053	0.00371632	0.000797369	0.000779587	0.000159117	0.391486	0.599437	0.70706	0.919516	0.655212	0.217241	0.937072	0.352717	0.678076	0.896994	0.31309
FFR-rs12346205	A	T	0.00421046	0.000255611	-0.000135183	4.15231e-06	0.000213096	0.00013652	-5.61151e-06	0.000287286	0.00385285	0.000199297	0.0012216	-0.000175836	0.000349246	0.000307706	2.5219e-05	0.000401157	0.000399405	0.000136716	0.000974243	0.00262323	0.000559764	0.000548005	0.000111643	0.464234	0.660425	0.869219	0.595278	0.732495	0.96726	0.768085	0.141904	0.721813	0.0258036	0.115261
FFR-rs12518248	T	C	0.0105678	0.000428674	0.000184366	2.23169e-05	-0.000121245	-0.00115823	-0.00016942	-1.08195e-05	-0.000305924	0.000240967	0.000399656	-0.000102215	0.000372766	0.000295905	2.53877e-05	0.000404136	0.00040226	0.0001379	0.000985263	0.00263084	0.000565096	0.000551535	0.000112618	0.250153	0.533246	0.379378	0.76417	0.00398587	0.219236	0.991238	0.907428	0.669803	0.468683	0.364078
FFR-rs12520103	A	G	0.0226557	0.000186709	-0.000160299	1.08858e-05	0.000403035	0.00031562	6.31393e-05	-0.000677869	0.00371343	0.000193073	-5.98349e-05	-5.90917e-05	0.000343619	0.000315522	2.53118e-05	0.000402984	0.000401208	0.000137039	0.000969274	0.00264845	0.000560773	0.000549971	0.000111656	0.586883	0.611424	0.667147	0.317249	0.431474	0.644987	0.484329	0.160882	0.730623	0.913364	0.596648
FFR-rs12522114	C	A	0.0377623	-0.00170125	-5.17463e-05	3.59672e-05	-0.000243309	0.000172248	-1.41852e-05	-0.0015158	-0.00169761	-0.000403724	-0.000259291	4.74995e-05	0.000562634	0.000285309	2.88421e-05	0.000456758	0.00045487	0.000155654	0.00110479	0.00303101	0.000636487	0.000620263	0.000126189	0.00249724	0.856078	0.212385	0.594251	0.704929	0.927387	0.17006	0.575425	0.525887	0.675923	0.70661
FFR-rs12549339	G	A	0.999864	-0.000511208	-2.38403e-05	-1.05588e-05	4.17137e-05	-2.6402e-05	0.000234295	-0.000695164	-0.00652117	-0.00121554	-0.000849822	0.000132464	0.000475915	0.000281623	2.70662e-05	0.000430123	0.000428121	0.000146946	0.00104083	0.00284326	0.000598644	0.000585752	0.000119625	0.282753	0.932537	0.696454	0.922742	0.950826	0.110842	0.504204	0.0218173	0.0423092	0.146832	0.268154
FFR-rs12627254	G	T	0.00928519	-0.0023845	0.000387771	-1.28232e-06	-0.00116381	0.00073878	0.000156206	-0.000483941	0.00213241	-0.000608223	-0.000575854	-0.000148307	0.00110597	0.000329295	3.74746e-05	0.000595099	0.000592611	0.000202522	0.00141927	0.0038695	0.000825585	0.000811113	0.000163899	0.031084	0.238967	0.972703	0.0505073	0.212526	0.440529	0.73312	0.581578	0.461295	0.477734	0.365536
FFR-rs1265097	C	A	0.00187168	0.00327532	-0.00038362	-4.21156e-05	-0.000558669	-0.00106033	4.324e-05	0.00282306	0.0112329	0.000730926	-0.000742516	-0.00017763	0.00174376	0.000390633	4.61174e-05	0.000732558	0.000729339	0.000249598	0.00175063	0.00554082	0.00101067	0.000998641	0.00020494	0.0603402	0.326078	0.361125	0.445686	0.145996	0.862464	0.106834	0.0426326	0.469551	0.457164	0.386086
FFR-rs12660153	T	G	0.00655002	-0.000649738	0.000234851	-2.31588e-05	0.000458211	0.00095674	-5.98001e-05	-0.00111895	-0.00540697	-0.00185647	-0.0005909	0.000265596	0.000711349	0.000295313	3.14228e-05	0.000499435	0.000497142	0.000170136	0.00120729	0.00331623	0.000698954	0.00068778	0.000139613	0.36104	0.426463	0.461118	0.358903	0.054296	0.725225	0.354015	0.103007	0.00790699	0.390264	0.0571257
FFR-rs12698403	G	A	0.0213323	0.000122767	-2.27203e-05	-2.68101e-05	0.000154687	0.000478221	4.94085e-05	0.000105755	0.00251804	-0.000552844	-0.000548221	-0.000151614	0.000355076	0.000303846	2.52586e-05	0.000401458	0.000399697	0.000136601	0.000973504	0.00264483	0.000558281	0.000545765	0.000112456	0.729531	0.940393	0.288499	0.700005	0.231519	0.717578	0.913494	0.341068	0.322049	0.31514	0.177598
FFR-rs12715478	A	G	0.280357	0.000687999	0.000122453	-5.01599e-06	0.000107078	0.00124004	5.12965e-05	8.52128e-05	0.00320361	0.000233817	-0.000106872	8.63864e-05	0.0003803	0.000297117	2.56912e-05	0.000408006	0.000406155	0.000139211	0.000979464	0.00267874	0.00056676	0.000554368	0.0001137	0.070438	0.68024	0.845204	0.79298	0.00226508	0.712516	0.930672	0.231721	0.679937	0.84713	0.44739
FFR-rs12912792	A	T	0.00728609	0.000478089	-7.98491e-06	2.32216e-05	0.000587975	0.000470887	0.000135035	-0.000826732	-0.000804271	0.000403541	0.00125666	2.20032e-05	0.000445762	0.000284671	2.66392e-05	0.000423628	0.000421488	0.00014432	0.0010211	0.00278036	0.000588074	0.00057635	0.000117695	0.283488	0.977623	0.383368	0.165153	0.26391	0.349448	0.418142	0.772376	0.492584	0.0292318	0.8517
FFR-rs12939728	C	A	0.00262316	-0.000233868	0.000158797	1.95634e-05	0.000172847	7.11029e-05	0.000197121	-0.000656094	-0.00513596	-0.000931363	-0.00143684	-4.26481e-05	0.000397025	0.000290746	2.58021e-05	0.000410207	0.000408334	0.00013998	0.000988618	0.00271764	0.000570401	0.000559193	0.000113729	0.555828	0.584949	0.448327	0.673488	0.861764	0.159073	0.506917	0.0587783	0.102509	0.0101862	0.707663
FFR-rs1294417	C	T	0.00203892	0.000256918	-0.000133881	-1.89126e-05	0.000428613	0.000155554	0.000129417	-0.000426737	-0.000378224	-0.000574882	0.000260344	0.000129467	0.000345947	0.000309953	2.52014e-05	0.000400333	0.000398429	0.0001366	0.000967299	0.00266876	0.000557806	0.00054619	0.000111514	0.457694	0.665785	0.452979	0.284332	0.696228	0.343427	0.659095	0.887299	0.302724	0.633609	0.245645
FFR-rs13018626	C	T	0.342367	-0.001735	-0.000112551	5.90384e-05	0.000808964	0.00128025	0.000235701	-0.00356424	-0.00331007	0.000660266	0.000563193	-7.47195e-05	0.0022097	0.000416897	5.01047e-05	0.000796493	0.00079206	0.000271701	0.00190668	0.00495435	0.00110439	0.00108518	0.000223794	0.432352	0.787181	0.238678	0.309794	0.106019	0.385669	0.0615764	0.504061	0.549937	0.603772	0.738473
FFR-rs13019081	A	C	0.00730821	8.71367e-05	-0.000248852	1.95049e-05	0.00091231	3.78984e-05	0.000227722	-0.000114167	-0.000447467	0.000488713	0.00117179	-2.48281e-05	0.000393702	0.000290048	2.57246e-05	0.000408616	0.000406638	0.00013927	0.000984863	0.00271586	0.00056769	0.000556608	0.000112712	0.824838	0.390911	0.44832	0.0255711	0.925745	0.102026	0.907715	0.869133	0.389306	0.0352733	0.825654
FFR-rs13033579	C	G	0.0760235	-9.43811e-05	-0.000298847	3.95773e-05	0.00077097	0.000322818	-1.45789e-05	0.000849527	-0.00169104	0.00180161	0.000926645	3.31261e-05	0.000498069	0.000281065	2.74645e-05	0.000435841	0.000433914	0.000148724	0.00105293	0.00296674	0.000609768	0.000596025	0.000122209	0.849706	0.287663	0.149577	0.0769082	0.456896	0.921911	0.419771	0.568679	0.00313158	0.120019	0.786345
FFR-rs13041686	T	C	0.00289258	0.000511614	-0.000293475	2.00428e-06	0.00103363	0.000689927	-4.23009e-05	-0.000404923	-0.00321867	0.000851884	0.000382635	-7.09486e-05	0.000682839	0.000289254	3.06566e-05	0.000487132	0.000485346	0.000166206	0.00116854	0.00318135	0.000679227	0.000666647	0.000135876	0.45371	0.310301	0.947873	0.0338498	0.155169	0.799103	0.728951	0.311668	0.209773	0.56599	0.601563
FFR-rs13073544	G	C	0.0209956	1.07334e-05	-0.000175772	3.59774e-05	0.000478425	0.00093168	-4.19555e-05	-0.00016969	0.00326379	-0.000154428	-0.000900205	4.50627e-05	0.000540866	0.000284802	2.84241e-05	0.000451688	0.000449696	0.000153448	0.00109207	0.00292627	0.00062754	0.000614024	0.00012545	0.984167	0.537122	0.205609	0.289513	0.0382854	0.784532	0.876519	0.264705	0.805617	0.142631	0.71944
FFR-rs13196771	C	T	0.00160203	0.000469525	-0.000303738	8.11768e-05	-0.00125071	0.000640006	-0.000211015	0.00160894	0.00274271	0.00100419	0.000134623	0.00017171	0.000892781	0.00030865	3.41275e-05	0.000543435	0.000540781	0.000185268	0.00131323	0.00346834	0.000752127	0.000733639	0.000152053	0.59895	0.325076	0.0173779	0.0213646	0.236619	0.254714	0.220509	0.429071	0.181834	0.854406	0.258785
FFR-rs13271359	C	T	0.00117639	0.000805162	-7.08036e-07	7.61474e-06	-0.000712277	0.000117494	7.97787e-05	0.000775396	-0.000477339	-0.000353223	-0.000785705	-0.000110211	0.000568504	0.000285594	2.89144e-05	0.00045944	0.000457501	0.000157066	0.00110677	0.00299866	0.000642198	0.000624753	0.000127307	0.156694	0.998022	0.792277	0.121067	0.797321	0.611501	0.483559	0.873524	0.582305	0.20853	0.386651
FFR-rs13314464	C	G	0.00385197	-2.19374e-05	-0.000556599	-6.04406e-06	0.00104093	-0.000410125	0.000108586	-0.0010725	-0.00328	0.000264054	0.000569079	0.000146187	0.000378115	0.000294366	2.55083e-05	0.000404934	0.000403257	0.000138062	0.000977075	0.00270256	0.00056274	0.000550202	0.000113202	0.953735	0.0586473	0.8127	0.0101524	0.30914	0.431573	0.272354	0.224877	0.638906	0.300993	0.196572
FFR-rs1338227	T	G	0.007402	0.000670447	0.000664418	-3.03161e-06	0.000227165	0.000598916	8.15465e-06	-0.000129099	0.00378021	-2.34999e-05	0.000551465	0.000227729	0.000372339	0.000298871	2.54219e-05	0.000405781	0.000404095	0.000138093	0.000978881	0.00265852	0.000566239	0.000552794	0.000112125	0.0717621	0.026211	0.905076	0.575601	0.138311	0.952911	0.895076	0.15505	0.966896	0.318477	0.0422555
FFR-rs1406225	G	T	0.00129416	-0.000159098	-0.000463752	-2.67173e-05	0.00064016	0.000407743	0.000123206	-0.000649958	0.00446959	0.000460757	0.000198502	6.08266e-05	0.000519328	0.000281316	2.77423e-05	0.000441933	0.000439888	0.000150946	0.00106508	0.00289385	0.000614658	0.000602207	0.000123262	0.759336	0.0992498	0.335521	0.147466	0.353967	0.414374	0.541702	0.122466	0.453487	0.741684	0.621679
FFR-rs1416685	G	C	0.0495758	0.000184179	0.000587211	2.70482e-05	-0.000382517	0.000267858	-4.7873e-05	0.00092053	0.00715335	0.000795102	-0.000169144	-1.35617e-05	0.00037948	0.000295023	2.56134e-05	0.000406217	0.000404398	0.00013828	0.000989433	0.00270506	0.000566518	0.000552442	0.000112195	0.627432	0.0465496	0.29096	0.34637	0.50774	0.729191	0.352186	0.0081834	0.160473	0.759472	0.903789
FFR-rs141940835	G	GTA	0.000860044	-0.000330067	-6.68574e-06	2.57463e-05	-0.000855755	0.000347146	0.000254022	-0.00282116	-0.00141026	-0.00223065	-0.00208499	-0.000361632	0.00205631	0.000410243	4.87944e-05	0.000779763	0.000776437	0.000266435	0.00185716	0.00486057	0.00108895	0.00106654	0.000218213	0.872476	0.986997	0.597743	0.272444	0.654803	0.340384	0.128746	0.771707	0.0405201	0.050596	0.0974743
FFR-rs141942982	G	T	0.00280694	-0.000337538	-0.000154629	-7.11165e-05	0.000567649	-0.00076392	0.000237514	-0.00180708	-0.00964133	-0.000846828	0.000286782	0.000106198	0.00132893	0.000349032	4.02541e-05	0.000643258	0.00064019	0.000218136	0.00156621	0.00419149	0.000895793	0.000878239	0.000175632	0.799502	0.657751	0.0772821	0.37753	0.232765	0.276227	0.248588	0.021437	0.344488	0.744014	0.545405
FFR-rs143418422	CT	C	0.0167357	0.00026034	1.74205e-05	2.56396e-05	0.000158359	0.000667729	-4.62682e-05	0.00010671	-0.000992844	0.000948035	0.000377102	0.000157703	0.000450725	0.000295225	2.73154e-05	0.000434631	0.000432844	0.000148176	0.00105752	0.00293034	0.000608895	0.000593277	0.000121111	0.563533	0.952946	0.347911	0.715596	0.122916	0.75485	0.919625	0.734749	0.119479	0.525022	0.192873
FFR-rs1441207	G	C	0.040191	1.19945e-05	-1.67948e-05	-3.22767e-05	-0.000351648	0.00037772	-3.37196e-05	0.00028697	-0.000816137	-0.00117597	-0.000363231	0.00026145	0.000568359	0.000282979	2.87363e-05	0.000456275	0.000454406	0.000155855	0.00109681	0.00300025	0.000635546	0.000621099	0.000126731	0.983163	0.952674	0.261353	0.44089	0.405839	0.828713	0.793599	0.785604	0.0642675	0.558669	0.0391128
FFR-rs1441358	T	G	0.0762937	-0.00257766	0.0014342	-3.05099e-05	0.0015845	0.000364278	3.23656e-05	0.000235582	-0.00132772	0.000785013	0.000344226	8.8007e-05	0.000450122	0.000288213	2.6516e-05	0.000421357	0.00041963	0.000143693	0.00101828	0.00276596	0.000588107	0.000575453	0.000116326	1.02626e-08	6.49034e-07	0.249889	0.000169647	0.385344	0.821792	0.817041	0.631212	0.18194	0.54972	0.449319
FFR-rs1452909	G	A	0.0193097	0.000308508	-0.000341826	-9.41174e-06	-0.000112858	0.00148785	0.000169206	0.000957118	0.00385282	-0.000229243	-0.000447125	-9.03551e-05	0.000581267	0.000284557	2.91023e-05	0.000460975	0.000459107	0.000157212	0.00112049	0.0030529	0.000644849	0.000629854	0.000128202	0.595591	0.229654	0.746391	0.806592	0.00119235	0.281799	0.392996	0.206944	0.722216	0.477775	0.480946
FFR-rs150950448	G	A	0.00820463	8.67487e-05	-2.94824e-05	2.38241e-05	-0.000437334	-0.000769824	0.000150467	0.000223511	0.00813349	-0.000266413	-0.000732139	-0.000251989	0.0011605	0.000336112	3.84159e-05	0.000610344	0.000607611	0.000208048	0.00148337	0.00405134	0.000851575	0.000830595	0.00017189	0.940413	0.930103	0.535152	0.473661	0.205168	0.469539	0.88023	0.0446865	0.754397	0.378068	0.142655
FFR-rs1528624	T	G	0.0949119	9.1571e-05	3.46731e-05	1.42037e-05	0.000791992	0.000225896	-3.70774e-05	0.00170893	0.00233084	0.00142353	0.000755578	0.000161212	0.000327939	0.00032411	2.50861e-05	0.000399225	0.000397346	0.000136131	0.000964089	0.0025525	0.000555716	0.000543776	0.000110883	0.780067	0.914805	0.571261	0.0472769	0.569688	0.785342	0.0762992	0.361161	0.0104197	0.164683	0.145981
FFR-rs1529672	C	A	0.0328701	-0.000662625	0.000301698	2.19485e-05	-0.0010272	-0.000332657	-0.000162855	0.00168891	0.00707116	0.000140572	-0.000719831	1.77162e-05	0.000839077	0.000304055	3.33317e-05	0.000529604	0.00052711	0.000180384	0.00126093	0.00338808	0.000733653	0.000717541	0.000147258	0.4297	0.321079	0.510225	0.0524334	0.527979	0.366623	0.180438	0.0368833	0.848052	0.315771	0.90424
FFR-rs153919	G	T	0.00633806	0.000450794	0.000275884	-2.22346e-05	-0.000132592	-0.000350593	-3.69817e-05	0.0010656	-0.0027896	5.87574e-05	-6.26861e-05	6.25671e-05	0.000354201	0.000309979	2.55016e-05	0.000404766	0.000402879	0.00013805	0.000986073	0.00264191	0.000565298	0.000551835	0.000113424	0.203125	0.373462	0.38327	0.743232	0.384182	0.788787	0.279856	0.291013	0.917217	0.909559	0.58121
FFR-rs1561073	A	T	0.0112941	0.000960585	-0.000101918	5.33516e-05	0.000125639	0.000258018	0.000129381	-0.000745004	0.00721366	-9.82826e-05	0.00108891	8.45263e-05	0.000560251	0.000282918	2.8617e-05	0.000454705	0.000452673	0.00015499	0.00109614	0.00302297	0.00063413	0.00062048	0.000127022	0.0864269	0.71867	0.062277	0.782311	0.568687	0.403849	0.496721	0.0170207	0.876831	0.0792715	0.505768
FFR-rs1566834	T	C	0.00191768	0.000207032	6.72675e-05	-7.82206e-06	0.000927277	-0.000624484	5.31395e-05	9.28971e-05	0.00275171	-0.000206343	7.53597e-05	-6.97612e-06	0.000438183	0.00028438	2.646e-05	0.000420286	0.000418412	0.000143342	0.00102119	0.00270316	0.000584793	0.000572849	0.000118494	0.636586	0.813013	0.767522	0.027364	0.135567	0.710848	0.927517	0.308699	0.724203	0.895339	0.953053
FFR-rs158638	G	A	0.999902	-5.88209e-05	-7.61149e-05	3.62233e-05	0.000624687	0.000853052	-1.52795e-05	-1.74111e-07	-0.00430605	-7.72937e-06	-0.000813391	4.53573e-05	0.00032568	0.000322812	2.50413e-05	0.000397732	0.000395825	0.000135492	0.000964556	0.0026337	0.000555623	0.000542419	0.000110768	0.856674	0.813598	0.148027	0.116272	0.0311531	0.910212	0.999856	0.102055	0.988901	0.133731	0.682188
FFR-rs16825181	G	T	0.00138252	-0.00023353	-3.82958e-05	-3.73526e-05	0.000524732	0.000831188	0.000153337	0.00185752	0.00477258	0.000550999	0.000786857	0.000122185	0.000793919	0.000300369	3.26878e-05	0.000519108	0.000516954	0.000177143	0.00126518	0.00340608	0.000724828	0.00070933	0.00014455	0.768644	0.898548	0.253161	0.312097	0.107868	0.386703	0.142054	0.161158	0.44715	0.267305	0.397957
FFR-rs17058639	C	T	0.000350339	0.000268259	-7.01933e-06	2.79372e-05	9.61421e-05	-0.000796262	0.000217796	0.000887509	-0.00221849	0.0005023	-0.000446067	3.10808e-05	0.000593142	0.000283476	2.90957e-05	0.000462679	0.000460762	0.000157768	0.0011262	0.00311759	0.000644114	0.000629514	0.000129254	0.651076	0.980245	0.336964	0.83539	0.0839647	0.167439	0.430663	0.476711	0.435492	0.478581	0.809972
FFR-rs17127013	T	C	0.0297441	-0.00298199	-0.000235833	9.4674e-06	-0.00100956	0.0002595	0.000111968	-0.00345532	0.00411343	-0.00104938	4.93366e-05	-0.000381902	0.00147222	0.000363368	4.25997e-05	0.000674522	0.000671423	0.000230079	0.00164802	0.0045295	0.00094163	0.000918831	0.000186815	0.0428166	0.516326	0.824126	0.13447	0.699132	0.626507	0.0360259	0.363804	0.265096	0.957178	0.0409292
FFR-rs17142630	A	G	0.0199128	-0.000720957	-4.11922e-05	-4.58919e-05	-0.000645998	-2.45063e-05	-0.000153139	0.000643585	-0.00142169	-0.000666423	-9.68705e-05	2.39679e-05	0.00117907	0.000336934	3.85157e-05	0.00061295	0.000610345	0.000208975	0.0014653	0.00396937	0.000851649	0.000837888	0.000170539	0.540895	0.902696	0.233454	0.291922	0.967972	0.463675	0.660504	0.72022	0.433917	0.90796	0.888232
FFR-rs17178530	C	G	0.00531673	-0.00032763	-0.000184847	4.7606e-05	-4.25297e-05	0.000293222	0.000124028	0.00146293	-0.00196968	0.000772542	9.41303e-05	-0.000114331	0.000329883	0.000319388	2.50017e-05	0.000397887	0.00039611	0.000135522	0.00097031	0.00263775	0.000554358	0.000539772	0.000111236	0.320628	0.562755	0.0568972	0.914877	0.459147	0.360095	0.131634	0.455228	0.163447	0.86156	0.304036
FFR-rs17294892	T	C	0.00592988	6.67504e-05	-0.000230803	-5.11255e-05	0.000729405	0.000163421	-0.000274673	0.00101365	0.000253748	-0.000494236	-0.000849049	0.000101169	0.00100925	0.000320776	3.59248e-05	0.000573532	0.000570678	0.000195709	0.00136979	0.00383876	0.000795547	0.000780264	0.000160483	0.947267	0.471825	0.154701	0.203454	0.774601	0.160476	0.4593	0.947297	0.534434	0.276529	0.528432
FFR-rs17531405	G	C	0.0194963	-0.00072211	0.000112595	-2.55184e-05	8.79424e-05	-0.00017065	-5.17852e-05	0.000914483	0.00297327	0.00067699	-4.99456e-05	0.000135985	0.000807884	0.000302239	3.29644e-05	0.000523623	0.000521234	0.000177893	0.0012855	0.00357025	0.000727473	0.000712891	0.000145748	0.371415	0.709495	0.438861	0.866623	0.743368	0.770973	0.476849	0.404963	0.352059	0.944146	0.350815
FFR-rs178015	G	A	0.00156495	0.000163265	-0.000381419	2.7133e-05	0.000744138	5.29009e-05	9.42397e-05	0.000334624	-0.000624781	0.00218925	0.000705829	1.72781e-05	0.000419681	0.000289843	2.63559e-05	0.000418642	0.000416938	0.000142662	0.00101275	0.00274502	0.000582362	0.000571237	0.000116703	0.697261	0.188194	0.303252	0.0754866	0.899036	0.508883	0.74109	0.819953	0.000170504	0.216604	0.882302
FFR-rs1783575	T	G	0.00189005	0.000851645	3.26579e-05	-4.67399e-05	-0.000214068	0.000419744	4.18234e-05	0.000546702	5.11616e-05	-0.000114154	0.000239592	8.25576e-05	0.000631046	0.000285961	2.97653e-05	0.000473437	0.000471348	0.000161131	0.00112693	0.00310523	0.000656975	0.000642595	0.000131156	0.177153	0.909076	0.116351	0.651156	0.373189	0.795202	0.627589	0.986855	0.862057	0.70926	0.529048
FFR-rs1849496	C	A	0.00102449	-0.00358392	0.000210853	-5.25377e-05	-0.00109841	-0.00135217	0.000435447	0.00258412	0.00424179	-0.000413927	0.00163452	0.000278077	0.00228469	0.000439568	5.28916e-05	0.000837778	0.000834176	0.000283089	0.00198194	0.00548257	0.00116676	0.00114976	0.000233059	0.116726	0.631454	0.320561	0.189825	0.105028	0.124002	0.192293	0.439117	0.722765	0.15514	0.232809
FFR-rs1855970	T	G	0.00124083	-0.000389565	9.96236e-05	-3.01238e-05	-0.000690273	0.000246076	-0.000199962	0.00016555	0.00221361	0.000471307	-0.000840195	1.45642e-05	0.000856751	0.000305814	3.35933e-05	0.000534755	0.000532247	0.000181842	0.00128953	0.00342029	0.000740193	0.000728343	0.000149424	0.649325	0.744602	0.36987	0.196767	0.643843	0.271487	0.897848	0.517504	0.524299	0.248679	0.922354
FFR-rs1881586	T	C	0.166902	6.64607e-06	-3.15602e-05	5.98892e-06	-0.00049835	-0.000163295	-6.7294e-05	0.000644601	-0.00188634	-0.000438959	-0.000146241	-5.8496e-05	0.000359783	0.000303752	2.54076e-05	0.000403563	0.000401819	0.000137708	0.000974753	0.00262979	0.000561803	0.000549466	0.000112425	0.985262	0.917248	0.813655	0.216878	0.684456	0.625074	0.508422	0.47319	0.434604	0.790124	0.602848
FFR-rs1896797	G	A	0.0186639	-0.000278889	8.05297e-05	1.15628e-05	-0.00084008	-0.000612867	-4.22373e-05	0.000787045	-0.000816301	-0.00039629	-0.000459321	-0.000177794	0.000331682	0.000323002	2.51279e-05	0.000398848	0.000397125	0.000136256	0.000966251	0.002579	0.000555591	0.000544509	0.000110585	0.400443	0.803116	0.645403	0.0351828	0.122769	0.756573	0.41534	0.751609	0.475675	0.398923	0.10789
FFR-rs201984812	A	ATT	0.00463047	-0.000272817	-5.81677e-05	1.75131e-05	-0.000589562	0.00070908	2.09414e-05	0.000147191	-0.00277859	-0.00052264	-0.000729074	-8.26527e-05	0.000405381	0.000288556	2.59259e-05	0.000411888	0.000410169	0.000140696	0.000991046	0.00269437	0.000574643	0.000561766	0.000114913	0.500955	0.840244	0.499356	0.152327	0.0838551	0.881679	0.881932	0.30242	0.363086	0.19435	0.471981
FFR-rs2027761	C	T	0.000614553	-0.000518351	0.000403782	-1.8946e-06	-0.000494796	-0.000574334	0.000147651	0.000789308	4.65561e-05	0.00109277	-0.000115121	5.89705e-05	0.00124356	0.000343611	3.9426e-05	0.000628195	0.000625378	0.00021466	0.0015726	0.00404944	0.000877969	0.000861259	0.000172918	0.676805	0.239951	0.961673	0.430904	0.358421	0.491557	0.615729	0.990827	0.21326	0.893667	0.73308
FFR-rs2070600	C	T	0.121541	-0.00132544	0.000425557	-2.84512e-05	-0.00179588	-0.000928378	-7.11814e-05	-0.00193483	-0.00195449	-0.00145165	-0.000392673	-1.61243e-05	0.00215249	0.000431929	5.09452e-05	0.000810968	0.000806708	0.000278481	0.00196605	0.00528852	0.00112866	0.00110399	0.000222904	0.538046	0.324504	0.576526	0.0267966	0.249807	0.798256	0.325058	0.711702	0.198384	0.722077	0.942333
FFR-rs2076295	T	G	0.0113266	-0.000923918	-0.000248012	-1.46707e-05	0.000102712	0.000227443	2.05058e-05	0.000505901	0.00338375	0.000365464	0.000436012	-0.000140596	0.000350774	0.000308068	2.52798e-05	0.000402303	0.000400526	0.000137267	0.000975995	0.00273008	0.000559782	0.00054693	0.000111782	0.00844063	0.420788	0.561691	0.798484	0.570131	0.881249	0.604219	0.215186	0.513842	0.425337	0.20848
FFR-rs207667	C	T	0.000904418	4.91282e-05	-5.71837e-05	-1.3618e-05	-0.000272455	5.42437e-06	1.2583e-05	0.000444002	-0.00221865	-0.000791502	0.000396247	4.92361e-05	0.000441869	0.000283787	2.643e-05	0.000421131	0.000419333	0.000143542	0.00101206	0.00276748	0.000587637	0.000573228	0.000117676	0.911472	0.840306	0.60638	0.517658	0.989679	0.930146	0.660872	0.422735	0.178008	0.489406	0.675654
FFR-rs2077177	T	C	0.0442621	0.000317762	-0.000177618	-6.09645e-06	0.000150816	0.00014675	0.000110995	-0.000469258	-0.00320541	0.000142079	0.000573406	6.54021e-05	0.000383766	0.000296733	2.57418e-05	0.000409457	0.000407682	0.000139499	0.000981802	0.00274111	0.000570164	0.000559054	0.00011403	0.407666	0.549455	0.812788	0.712625	0.718875	0.426223	0.632683	0.242251	0.803215	0.305048	0.566271
FFR-rs2096100	G	C	0.00293264	0.00197464	0.000308051	2.78952e-05	0.00101989	0.00123423	-9.25097e-05	0.00353193	0.0066767	0.000224694	-0.000181692	-0.000124458	0.00138832	0.000357177	4.15298e-05	0.000659685	0.000656583	0.000225951	0.00159999	0.0042747	0.000921426	0.000901082	0.000185883	0.154933	0.388435	0.501781	0.122101	0.0601406	0.682229	0.0272825	0.118311	0.807344	0.8402	0.503146
FFR-rs2119568	T	C	0.103753	-0.00375182	0.0022223	-1.98857e-05	0.00138842	-7.93802e-05	8.413e-05	-1.55185e-05	-0.00289508	0.00078213	-2.68909e-05	0.000100098	0.000794654	0.000305272	3.24524e-05	0.000516731	0.00051468	0.000176217	0.0012585	0.0034663	0.00072153	0.000704145	0.000142932	2.34475e-06	3.35709e-13	0.540032	0.00721202	0.877427	0.633061	0.990162	0.403602	0.278372	0.969537	0.483729
FFR-rs2155646	T	C	0.00501686	0.000482121	-0.000343296	-7.76658e-06	-3.54961e-05	-0.000585795	9.86579e-05	-0.00059951	-0.00300662	0.000948563	-0.000127532	3.42429e-05	0.000394548	0.000290473	2.57272e-05	0.000408947	0.000406786	0.000139136	0.000987575	0.00271775	0.000569716	0.000557645	0.000113785	0.221726	0.237265	0.762742	0.930832	0.149853	0.478278	0.543817	0.268603	0.0959205	0.819104	0.763459
FFR-rs2160328	G	A	0.00328744	0.000146641	-6.90101e-05	-2.91761e-05	-0.00015021	-0.000463745	-8.93516e-05	0.00029519	-0.000603379	-0.000381607	-0.000180065	3.39166e-05	0.00039426	0.000289973	2.57205e-05	0.000408842	0.000406978	0.000139095	0.000993135	0.00265614	0.000567846	0.000556215	0.000113333	0.709939	0.811891	0.256647	0.713318	0.254503	0.520628	0.766291	0.820297	0.501569	0.746141	0.764739
FFR-rs2204928	T	C	0.000581017	-0.000674037	0.000243992	-9.37449e-06	-0.000856376	-0.000887018	-0.000169558	0.000704668	-0.00398193	-0.000184125	0.000427807	1.58913e-05	0.000692813	0.000291154	3.08391e-05	0.000490785	0.000488722	0.000167439	0.00117685	0.00319763	0.000680178	0.00066452	0.000135842	0.330604	0.402022	0.761143	0.0810021	0.0695295	0.311227	0.549325	0.213033	0.786621	0.519717	0.906873
FFR-rs2235566	G	A	0.000613626	0.000540378	0.000219441	8.89218e-06	-0.000476458	8.30221e-05	-0.000148488	-0.00128077	-0.00214497	-0.000960512	0.000238317	-3.66046e-06	0.000452403	0.000282871	2.66495e-05	0.000424054	0.00042202	0.00014474	0.00102712	0.00279241	0.000593123	0.000579593	0.000118291	0.232299	0.437891	0.738628	0.261193	0.844042	0.304944	0.212419	0.442403	0.105361	0.680942	0.975314
FFR-rs2236406	T	C	0.00270299	-0.000951068	0.000985473	-3.62897e-05	0.000479148	0.00104333	4.28848e-06	-0.00033177	0.00542621	-0.000556991	-0.000308519	0.000245676	0.000431307	0.000286916	2.63548e-05	0.000418579	0.000416713	0.000142457	0.00100831	0.00265782	0.000584193	0.000568866	0.000116305	0.0274495	0.000593318	0.168524	0.252335	0.0122904	0.975984	0.742129	0.0411921	0.34037	0.587585	0.0346603
FFR-rs2282040	A	G	0.00131543	-0.00181678	0.00116949	5.0441e-05	0.00142369	0.00159748	0.000250196	-0.000659761	0.00626612	-0.000388705	-5.69657e-06	0.000270494	0.00147325	0.00036688	4.26754e-05	0.000677563	0.000674371	0.000230476	0.00164874	0.00430591	0.000941492	0.000920488	0.000184277	0.217513	0.00143448	0.23722	0.0356257	0.0178447	0.277674	0.689039	0.145605	0.67971	0.995062	0.142143
FFR-rs2283847	T	C	0.0222263	-0.00036849	0.000177833	1.38729e-05	-0.000400853	-0.000234452	-0.000310572	3.05801e-05	0.0020934	0.00109245	0.000763964	0.000193283	0.000371482	0.00031841	2.64413e-05	0.00042029	0.000418266	0.000143087	0.00102293	0.00272384	0.00058687	0.000573449	0.000116463	0.321225	0.5765	0.599815	0.340209	0.575117	0.02997	0.976151	0.442163	0.062679	0.182788	0.0969953
FFR-rs2284747	T	C	0.00429854	0.000270964	0.000591667	-3.61494e-05	-0.00121768	-0.000234569	-0.000394504	-0.000607149	-0.00322798	-0.000739225	-0.00127705	-8.26427e-05	0.000337347	0.000317762	2.52176e-05	0.000400327	0.000398468	0.000136356	0.000968114	0.00262878	0.000556309	0.000544719	0.00011079	0.421848	0.0626077	0.151718	0.00235259	0.556079	0.00381391	0.530564	0.219472	0.183916	0.0190585	0.455704
FFR-rs2293476	G	C	0.00872577	0.000125411	5.86997e-06	-2.58428e-06	7.72314e-05	0.000337098	7.42673e-05	0.000602571	0.00168304	-0.000115405	0.000356809	-0.000321514	0.000632293	0.000286272	2.99222e-05	0.000474053	0.000471613	0.000161745	0.00113036	0.00311781	0.000658974	0.00064338	0.000131306	0.842777	0.983641	0.931175	0.870584	0.474747	0.646119	0.59398	0.589326	0.860979	0.57918	0.0143433
FFR-rs2303729	G	A	0.000851488	4.44046e-05	2.43626e-05	-3.19793e-05	-0.000168894	-0.000609219	-0.000124299	-0.000419042	0.0012734	-0.00106927	-0.000576332	0.000103028	0.000358525	0.000300603	2.51805e-05	0.00040064	0.000398748	0.00013618	0.000969865	0.00257079	0.000557981	0.000543732	0.000111235	0.901431	0.935406	0.204085	0.673346	0.126557	0.361369	0.665697	0.620364	0.0553269	0.289167	0.354332
FFR-rs2341097	C	T	0.000899215	-0.000197533	-8.60465e-05	2.10197e-05	-0.00143198	-0.000978892	-7.81067e-05	-0.00104447	-0.00283423	-0.000719503	-0.000793286	-0.000186776	0.000422032	0.000286227	2.61753e-05	0.00041592	0.000414045	0.00014161	0.000995717	0.00275547	0.000577632	0.000567669	0.000115444	0.639748	0.763702	0.421956	0.000575605	0.0180691	0.581248	0.294198	0.303677	0.212911	0.162283	0.105689
FFR-rs2355210	T	C	0.001805	-0.000203571	-3.69627e-05	3.48616e-05	-0.000431715	8.97947e-05	-6.29072e-05	0.00177163	0.00327805	0.00031361	9.60798e-05	9.07916e-05	0.000327303	0.000323047	2.51139e-05	0.000398512	0.00039664	0.000136043	0.000966501	0.00267179	0.000555723	0.000544578	0.000111053	0.533966	0.908906	0.165096	0.278669	0.8209	0.643789	0.0667987	0.219857	0.572531	0.859957	0.413615
FFR-rs2383304	G	A	0.00691265	0.000446964	-4.53821e-05	8.48973e-06	6.02902e-05	-0.000250594	0.000239334	-0.000392146	-0.00209685	-0.0003126	-0.00102747	-0.00018873	0.000504316	0.000282541	2.76615e-05	0.000439555	0.000437583	0.000149722	0.00105277	0.00285341	0.000612588	0.00059825	0.0001227	0.37547	0.872392	0.758909	0.890903	0.566864	0.109928	0.709528	0.462427	0.609847	0.0858986	0.124018
FFR-rs2422276	A	G	0.00411828	6.31679e-05	9.18282e-05	2.31228e-05	-7.48801e-05	-0.000298211	-6.47141e-05	0.000239036	-0.00411812	0.000573058	0.000242308	5.55132e-05	0.000347123	0.000308584	2.51903e-05	0.000400351	0.000398533	0.000136267	0.000954652	0.00258122	0.000556931	0.000546615	0.000111773	0.855602	0.766025	0.35866	0.851633	0.454298	0.634855	0.802286	0.11062	0.303502	0.657558	0.619428
FFR-rs2464523	T	C	0.125601	-0.000957086	-0.001022	-3.66994e-05	-0.000563009	-0.00151078	1.32052e-05	-0.00049425	0.00218935	-0.00128571	-0.000404229	-0.00018458	0.000679414	0.000290965	3.06304e-05	0.000486518	0.00048436	0.000165562	0.00118873	0.00330184	0.000683179	0.000665728	0.000134714	0.158928	0.000444092	0.230865	0.247183	0.00181417	0.936428	0.677573	0.507288	0.059845	0.54372	0.170639
FFR-rs2515127	T	C	0.00322494	0.000120068	-0.000294735	4.04514e-06	7.47275e-05	-0.000330954	-0.000338886	0.000574132	0.00164416	-5.14942e-05	0.000571352	-0.000115352	0.000436406	0.000284373	2.64244e-05	0.000420092	0.000418246	0.000143337	0.00101382	0.00277975	0.000585746	0.000571904	0.000117186	0.783217	0.3	0.878333	0.858815	0.428776	0.0180675	0.571186	0.554202	0.929947	0.31778	0.324948
FFR-rs2544533	C	T	0.00111074	-0.000336046	-0.000323437	-4.6716e-07	0.000462945	0.000351494	0.000114358	-0.00109775	-0.00488807	-0.000350712	0.000944071	-4.03472e-05	0.000330968	0.000321877	2.51859e-05	0.000400085	0.000398287	0.000136177	0.000973118	0.0026779	0.000557693	0.000544705	0.000112039	0.309944	0.314972	0.985201	0.247226	0.3775	0.401034	0.259288	0.0679519	0.52944	0.0830668	0.718761
FFR-rs2579762	A	C	0.000612718	0.000408725	0.000230704	-5.88879e-06	-0.000294754	-0.000109347	0.000305141	-0.00131456	0.000979579	-0.00074382	0.000123608	-0.000197433	0.000337271	0.000312806	2.50674e-05	0.000397928	0.00039596	0.00013538	0.000958615	0.00255552	0.000553473	0.000540289	0.000110605	0.225567	0.460801	0.814273	0.458863	0.782429	0.0242002	0.170281	0.701484	0.178979	0.819039	0.0742595
FFR-rs2579967	T	A	0.00258287	0.000520526	0.000368092	-1.98359e-05	0.000652159	-0.000374268	-5.24192e-05	0.000182703	0.00186399	-0.000215138	0.000325528	0.000192457	0.0005321	0.000281759	2.80042e-05	0.000446065	0.000443921	0.000151896	0.00107362	0.00296205	0.000621911	0.0006072	0.000124423	0.327952	0.191415	0.478749	0.143735	0.399176	0.73002	0.864872	0.529159	0.729395	0.591881	0.121914
FFR-rs2617881	T	A	0.434865	0.000309733	-6.17767e-05	4.01917e-05	0.000241904	0.000432426	6.45317e-06	0.0022894	0.0035019	0.000472733	0.000305196	0.000127832	0.00033617	0.000314797	2.49943e-05	0.000397383	0.000395603	0.000135447	0.000963211	0.00260604	0.000554101	0.000542769	0.000111245	0.356865	0.84442	0.107829	0.542695	0.27436	0.962	0.0174626	0.179026	0.393575	0.573917	0.250514
FFR-rs2765889	C	T	0.00572398	-0.000321499	-0.000259467	-6.37204e-05	-1.1083e-05	-0.00101243	5.33154e-05	0.000768891	-0.000732172	0.00055364	-0.000426713	-0.000290361	0.000571093	0.00028314	2.86923e-05	0.000456766	0.00045498	0.000155964	0.00111082	0.00306019	0.000636834	0.000621489	0.000128062	0.573467	0.359463	0.0263641	0.980642	0.026067	0.732468	0.488822	0.810907	0.38465	0.492337	0.0233712
FFR-rs2799098	A	G	0.291219	0.00133173	-0.000652504	1.04553e-06	-0.000518715	-0.00079902	-0.000214606	0.000583107	0.002342	0.000157001	-0.000262223	4.65791e-05	0.000801731	0.000300723	3.26935e-05	0.000519751	0.000517613	0.000177407	0.00125316	0.00336539	0.000728985	0.000712135	0.000144191	0.0967025	0.0300246	0.974488	0.318277	0.122671	0.226402	0.641711	0.486487	0.82948	0.712709	0.746667
FFR-rs2806356	T	C	0.0253514	0.00102512	-0.000495204	-8.56073e-06	0.000783334	-0.000376893	0.000109148	-0.000853799	-0.00225206	-4.74183e-05	0.000868313	-0.000162499	0.00076713	0.000297679	3.2119e-05	0.00051035	0.00050834	0.000173737	0.00122963	0.00327795	0.000712801	0.000697547	0.000142889	0.181453	0.0962043	0.78983	0.124811	0.45844	0.529848	0.487462	0.492063	0.946961	0.213204	0.255442
FFR-rs2811549	C	T	0.00031306	-0.000909254	0.000417899	-2.66026e-06	-0.00071597	0.000111728	-0.000128111	0.00124453	0.00287551	-0.00115556	0.000126617	-5.98243e-05	0.0011685	0.000336522	3.84365e-05	0.000610969	0.000608055	0.000208443	0.00145913	0.00386581	0.000845662	0.000834304	0.000169745	0.436488	0.214305	0.944821	0.241255	0.854213	0.538812	0.393701	0.45698	0.171799	0.879373	0.724511
FFR-rs3213150	G	A	0.00101727	-0.000690593	-0.00024169	-1.64427e-05	3.78603e-05	6.00915e-05	-5.31683e-05	-0.00136948	0.00528252	-0.000312829	-0.000409194	-1.37451e-05	0.000505105	0.000283588	2.77162e-05	0.000440448	0.000438524	0.000150628	0.00105698	0.00296476	0.000614342	0.00060116	0.000122414	0.171556	0.394072	0.553011	0.931499	0.891006	0.724106	0.195095	0.0747884	0.610607	0.496079	0.910599
FFR-rs330941	T	C	0.00118851	-0.00020085	9.77137e-05	-7.38287e-06	0.000601778	0.000559207	0.000127927	-0.000476477	-0.00086288	0.00105136	0.00109234	6.22291e-05	0.000410289	0.000293027	2.62074e-05	0.000417663	0.000415644	0.00014197	0.00101365	0.00276469	0.000580494	0.000568253	0.000115866	0.624466	0.738785	0.778167	0.149637	0.178498	0.367546	0.638313	0.754959	0.0701195	0.0545744	0.591216
FFR-rs34051876	TG	T	0.00701957	-0.000662959	0.000483083	2.50643e-05	0.000568328	0.000675151	0.000197252	0.000430635	-0.000578389	0.000451108	0.000465074	0.000266185	0.000355086	0.000308422	2.53886e-05	0.000403756	0.000401823	0.000137247	0.00098097	0.002679	0.000562702	0.000551278	0.000112123	0.0618979	0.117278	0.323533	0.159251	0.0929166	0.150661	0.66067	0.829068	0.422739	0.398878	0.0175967
FFR-rs34104452	A	G	0.102008	0.000601311	0.000160609	-3.22505e-05	-0.00102687	-0.00083578	-7.5445e-05	-0.00071584	0.000353034	-0.00069972	-0.000302075	-0.000287207	0.000384701	0.000299367	2.58867e-05	0.000411802	0.000409992	0.000140745	0.000996664	0.00269053	0.000574543	0.000562605	0.000114383	0.11804	0.591616	0.212827	0.0126465	0.0414985	0.59193	0.472613	0.895607	0.223275	0.591323	0.0120435
FFR-rs34245505	C	G	0.991466	0.000722003	0.000183368	-8.34813e-06	-7.01111e-05	0.000258122	-0.000134237	0.0012365	-0.00228785	0.00102775	-1.36824e-07	-3.42576e-05	0.00074915	0.000298966	3.2069e-05	0.000510032	0.000507879	0.000173497	0.00122939	0.00334405	0.000709914	0.000693552	0.000141207	0.335166	0.539652	0.794619	0.890664	0.611289	0.439102	0.314522	0.493877	0.147699	0.999843	0.808311
FFR-rs34246583	T	G	0.380001	-0.000869121	0.0010793	1.06638e-05	0.00119235	0.000532063	-0.000189092	-0.000996954	-0.00220732	-0.000155521	7.69658e-05	6.14137e-05	0.000488262	0.000335193	3.03636e-05	0.000483247	0.000480955	0.000164519	0.00116697	0.00310233	0.000675956	0.000656553	0.000134984	0.0750733	0.00128252	0.725436	0.0136124	0.268613	0.250408	0.392933	0.476773	0.818034	0.90668	0.649133
FFR-rs34712979	G	A	0.989013	2.2765e-05	-0.000290938	-4.12717e-05	0.00137969	0.000719387	2.09083e-05	0.000540418	0.00474875	0.000467777	0.000639408	-0.000135736	0.000564816	0.000284506	2.86424e-05	0.000453929	0.0004521	0.000154927	0.00109924	0.00300993	0.000632	0.000619733	0.000126861	0.96785	0.306494	0.149606	0.00237058	0.111564	0.892647	0.622981	0.114638	0.459208	0.302192	0.284638
FFR-rs35107139	A	C	0.00202005	-0.000230452	-3.76458e-05	1.81055e-05	0.000284283	6.12326e-05	4.00984e-05	0.000975251	0.00210687	0.000149029	-0.000589608	9.29246e-05	0.000424329	0.000311726	2.76709e-05	0.000439134	0.000437376	0.000149712	0.00106384	0.00285938	0.000610629	0.000599348	0.000122818	0.587064	0.903877	0.512909	0.517393	0.88866	0.788826	0.359288	0.46123	0.807186	0.325241	0.44929
FFR-rs35246838	T	C	0.0339744	-0.000503927	-0.00040869	-4.01785e-05	0.00126025	0.000982092	0.000124013	-0.00223812	0.00778524	0.000676127	0.00137085	0.000266538	0.0011214	0.000333895	3.80582e-05	0.000603649	0.000601275	0.000206297	0.00146133	0.00384156	0.000843288	0.000822669	0.000169639	0.653162	0.220951	0.2911	0.0368239	0.102397	0.547748	0.125633	0.0427067	0.422685	0.0956471	0.116137
FFR-rs35305377	A	G	0.159936	0.000339132	-0.00040073	6.45051e-05	0.000211342	0.000512339	-5.89379e-05	0.00112194	0.00382843	-5.83945e-05	-1.62056e-05	-1.66545e-05	0.00035002	0.000307889	2.52661e-05	0.000401626	0.000399617	0.00013657	0.000965922	0.00264132	0.00055849	0.000547302	0.000112072	0.332599	0.193074	0.0106799	0.598739	0.199817	0.666062	0.245433	0.147218	0.916727	0.976378	0.881865
FFR-rs35420030	T	C	0.00403512	-0.00205481	0.000545468	-6.87736e-05	-0.00145659	-0.000127539	2.38161e-05	-0.00361672	-0.0018938	-0.00132282	-0.00192665	-0.000323665	0.0026618	0.00046597	5.64366e-05	0.000895603	0.000890409	0.000306391	0.00217545	0.00579183	0.0012472	0.00121775	0.000241691	0.440138	0.241758	0.222997	0.103871	0.886104	0.938042	0.0964118	0.743685	0.28886	0.113622	0.180519
FFR-rs35684381	T	C	0.00668473	-0.000519859	3.58491e-05	-2.85702e-05	0.000528436	-0.000296705	3.24663e-05	0.000996584	-0.000313125	0.000253252	0.000500481	-8.66707e-06	0.00101314	0.000321302	3.61525e-05	0.000574731	0.000572624	0.000196498	0.00137625	0.003803	0.000804906	0.000781634	0.000160916	0.607869	0.911161	0.429372	0.357862	0.604354	0.868767	0.468987	0.934379	0.753039	0.521978	0.957046
FFR-rs36023701	C	G	0.00498002	-0.000327212	-0.000708468	-8.25426e-06	-0.00115894	-0.000534066	8.3396e-05	0.00127302	0.00689782	-0.00128292	-0.000324102	6.45043e-05	0.000392941	0.00029469	2.56792e-05	0.000407176	0.000405331	0.000138915	0.000987832	0.00267765	0.000567077	0.000554672	0.000113101	0.405	0.0162128	0.747879	0.00442382	0.187638	0.548282	0.197504	0.00999358	0.0236782	0.559011	0.56846
FFR-rs372839783	G	GA	0.00582068	-0.000215729	-2.53132e-05	2.76166e-05	-0.000517894	0.000460574	-0.000218382	0.000570902	0.00296716	-0.00139162	-0.00066144	-0.000324793	0.0014687	0.00037461	4.36526e-05	0.000693364	0.000689912	0.000237399	0.00168292	0.00468502	0.000968512	0.000940177	0.000191667	0.883224	0.946126	0.526966	0.455107	0.5044	0.357631	0.734434	0.52652	0.15076	0.481729	0.0901609
FFR-rs3747973	G	A	0.004666	-3.47634e-05	-0.000269261	-8.54482e-06	0.000192247	0.000171596	0.000249758	0.000898996	-0.00167484	1.322e-05	3.22595e-05	-0.000129043	0.000378902	0.000296	2.5608e-05	0.00040694	0.000405424	0.00013882	0.000988389	0.00265738	0.000567784	0.000556246	0.000112635	0.926898	0.363	0.738623	0.636626	0.672112	0.0719958	0.363058	0.528526	0.981424	0.953753	0.251931
FFR-rs3749833	T	C	0.00296334	0.000808021	6.74086e-05	-4.90559e-05	0.000483189	-7.64587e-06	6.31663e-05	0.00124646	0.00105412	0.00137537	0.00133341	7.13812e-05	0.00055506	0.000282108	2.84954e-05	0.000452033	0.000450167	0.00015378	0.00109285	0.00296447	0.00062971	0.000614701	0.000125259	0.145467	0.811148	0.0851551	0.285105	0.986449	0.681251	0.254055	0.722153	0.0289542	0.030069	0.568767
FFR-rs4074793	A	G	0.0477252	0.00038075	-0.000645895	-3.02532e-05	-0.000560798	-1.70788e-05	-0.000148623	0.00325265	0.00432208	0.000268539	-1.70671e-05	7.68664e-06	0.00190515	0.000400654	4.7558e-05	0.000756111	0.00075281	0.000257314	0.0018203	0.00493074	0.00103951	0.00103055	0.000207461	0.841596	0.106941	0.524691	0.458278	0.9819	0.56354	0.0739594	0.380727	0.796152	0.986787	0.970444
FFR-rs4077636	G	A	0.041053	-0.000198161	4.60366e-05	3.7872e-05	0.000564005	0.000207189	-0.000280655	-6.83124e-05	0.00378521	0.00144721	0.000950696	2.53522e-05	0.000334388	0.000331596	2.57229e-05	0.000408516	0.000406645	0.000138842	0.000995293	0.00271925	0.000569446	0.000555103	0.000112588	0.553444	0.889582	0.140939	0.167398	0.610396	0.0432403	0.94528	0.163922	0.0110412	0.0867799	0.821843
FFR-rs41158	G	A	0.0075641	7.40134e-05	0.000408343	3.86505e-05	0.000172191	-0.000116684	-0.000111612	0.00209605	0.00495031	0.000251257	-0.000577358	0.000140544	0.000325533	0.000323926	2.50158e-05	0.000398065	0.000396346	0.000135731	0.000956026	0.00261111	0.000555353	0.000541803	0.000111161	0.820144	0.207453	0.122337	0.665327	0.768452	0.410905	0.0283478	0.0579798	0.650962	0.286596	0.206115
FFR-rs4331881	G	T	0.00535903	-0.00130115	0.00106979	-1.12554e-05	0.00018788	-0.000731671	2.09606e-05	-3.05009e-05	0.0011262	-1.31496e-05	0.000458095	-7.44754e-05	0.000440957	0.000285704	2.64463e-05	0.00042029	0.000418604	0.000143683	0.00101421	0.00276145	0.000586985	0.000571458	0.000117721	0.00317057	0.000180869	0.670405	0.654858	0.0804859	0.884016	0.976008	0.683399	0.982127	0.422771	0.526968
FFR-rs4428086	G	A	0.000785914	0.000806418	-0.000583772	-1.0428e-05	0.000497509	-0.000115806	0.000348309	-0.000491322	-0.00348241	0.00085781	-0.000175057	5.31198e-05	0.000374664	0.000310442	2.61967e-05	0.000416042	0.000414293	0.000142018	0.00100749	0.00274558	0.000578646	0.000566245	0.00011573	0.031369	0.0600473	0.690584	0.23177	0.779842	0.014185	0.625783	0.204668	0.138225	0.757205	0.646236
FFR-rs4669370	T	C	0.0116147	0.000151072	7.18731e-05	-8.28033e-06	-0.000324483	0.000255929	5.50235e-05	0.000678942	-0.00246478	-0.000551041	-0.000232836	-0.000144709	0.000398918	0.000290528	2.58597e-05	0.00041086	0.000408941	0.000139885	0.000990045	0.00269938	0.000573656	0.000560174	0.000114255	0.704908	0.804609	0.748816	0.429665	0.531424	0.694063	0.49286	0.361194	0.336766	0.677668	0.20532
FFR-rs4682482	T	A	0.0058501	-0.000656706	-0.00014439	1.20537e-05	0.000275183	-0.000507468	0.000125335	-0.000815668	0.000488159	0.000645973	-0.000339502	-0.000188542	0.00080549	0.000303502	3.30303e-05	0.000524672	0.000522513	0.000178892	0.00125855	0.00335232	0.000730777	0.000714316	0.000145897	0.414909	0.634255	0.715166	0.599942	0.331446	0.483543	0.516921	0.884223	0.376723	0.634587	0.196258
FFR-rs4767324	T	A	0.00398509	0.000133995	-0.000301041	4.53589e-05	0.000776669	0.000239449	6.00159e-05	0.000691948	-1.39325e-05	0.000424405	0.000151419	1.54989e-05	0.000328652	0.000322387	2.50672e-05	0.000399042	0.000397214	0.000135881	0.000971182	0.00265138	0.000556291	0.000544342	0.000111134	0.683487	0.350415	0.0703766	0.051616	0.546629	0.658721	0.476168	0.995807	0.445513	0.780883	0.889086
FFR-rs4899518	G	A	0.00318214	0.000319827	2.91062e-06	-2.97442e-05	0.000230525	0.000166407	-1.14075e-05	0.0012168	0.000618004	0.000840104	0.000718666	-7.69226e-05	0.000635632	0.00028824	2.99384e-05	0.000477371	0.000475019	0.000162132	0.00114354	0.00322391	0.000661592	0.000647902	0.00013302	0.614849	0.991943	0.320461	0.629164	0.726102	0.943908	0.287303	0.847982	0.204151	0.267338	0.563076
FFR-rs4904145	A	G	0.00871526	0.000853789	-0.000181757	1.01377e-05	0.000647423	0.00044881	-0.000183514	-0.00090517	0.00186598	-0.000239321	-0.00058671	-4.10973e-06	0.000490975	0.00028272	2.73938e-05	0.00043532	0.00043335	0.000148318	0.00104831	0.0029196	0.000607256	0.000594609	0.000122312	0.0820423	0.520298	0.711328	0.136955	0.300355	0.215977	0.387886	0.522745	0.693506	0.323784	0.973196
FFR-rs4970414	T	G	0.00344681	0.000492155	-0.000332141	3.0813e-05	0.000161287	-0.000620436	-1.96374e-05	0.000392054	-0.00152707	0.00061659	-0.000705741	-3.08672e-05	0.000401449	0.000315624	2.72373e-05	0.000433352	0.000431559	0.00014802	0.00103995	0.00278836	0.000603426	0.000591131	0.000120244	0.220221	0.292648	0.257939	0.709756	0.150531	0.894457	0.706178	0.583928	0.306871	0.232526	0.797408
FFR-rs4975128	A	G	0.00388805	0.000519472	0.000111468	3.32149e-05	-0.000190693	0.000672777	-0.00026651	0.000909165	0.00469316	-0.000124313	8.34554e-05	1.23815e-05	0.000326856	0.000324804	2.51598e-05	0.000399226	0.000397327	0.000135786	0.000959398	0.00261985	0.000557103	0.000544337	0.000111237	0.111994	0.73146	0.186784	0.632894	0.0904086	0.0496798	0.343313	0.0732328	0.823425	0.878149	0.911373
FFR-rs5006439	C	T	0.00234451	-0.00117825	0.000142023	1.80315e-05	-0.000907247	0.000816592	-0.000187543	-0.000419106	-0.00267611	-0.000656168	-0.00119994	-4.83402e-05	0.000588152	0.000283457	2.9052e-05	0.000461512	0.00045945	0.000157489	0.0011091	0.00304115	0.000644221	0.000630997	0.000127268	0.0451462	0.616345	0.534823	0.0493215	0.0755166	0.233721	0.705521	0.378879	0.308422	0.0572191	0.704073
FFR-rs504388	C	T	0.000823433	6.74184e-05	7.48096e-05	5.75089e-05	-0.000571221	0.000482295	-0.000358559	0.00248084	0.0085489	-2.82231e-05	0.00177435	0.000626058	0.00189389	0.000403323	4.7956e-05	0.000761381	0.000758532	0.000259462	0.00182265	0.00483065	0.00105694	0.00103159	0.000213873	0.971603	0.85285	0.230451	0.453109	0.52489	0.166994	0.173478	0.0767752	0.978697	0.0854339	0.00342064
FFR-rs513953	G	A	0.00756077	0.000234045	0.000420203	-4.89143e-05	0.000151198	-0.000418507	2.7402e-05	0.00110318	0.00147859	-0.000762258	-0.000514713	-0.00035027	0.000575437	0.000283865	2.88733e-05	0.000458873	0.000457023	0.000156503	0.0010965	0.00294757	0.000637628	0.000625381	0.000127355	0.68421	0.138797	0.0902475	0.74178	0.359813	0.86101	0.31437	0.615927	0.23191	0.410487	0.00595435
FFR-rs531971847	C	CTTAAAAA	0.00204251	0.000597455	1.11335e-05	2.92905e-05	0.00102258	-0.000881752	-8.61319e-05	-0.00171376	-0.00263777	0.000154288	0.000214273	-0.000206485	0.000878248	0.000310639	3.42488e-05	0.000544605	0.000541855	0.000185105	0.00131633	0.00386631	0.000759219	0.000743381	0.000152436	0.496327	0.971409	0.392428	0.060431	0.103679	0.641707	0.192946	0.495084	0.838964	0.773163	0.175558
FFR-rs536695586	T	TA	0.00355031	-9.65837e-05	0.000315265	-6.81037e-05	-0.000225045	-0.000263107	-1.39799e-05	0.000385213	0.00488869	-6.98513e-05	0.00029367	8.69021e-05	0.000474041	0.000296483	2.79817e-05	0.000444504	0.000442462	0.000151147	0.00107773	0.00296909	0.000617492	0.00060584	0.000123082	0.838553	0.287624	0.0149395	0.612658	0.552082	0.926307	0.72077	0.0996567	0.909935	0.627867	0.480159
FFR-rs541601	C	T	0.000522621	-0.000440022	-0.000437854	1.69742e-06	0.000515181	-0.000197882	8.98265e-05	0.00062146	0.00319749	0.000546892	3.81109e-05	0.000240022	0.000785356	0.000298498	3.23395e-05	0.000515605	0.00051326	0.000176282	0.00125271	0.00337179	0.000716904	0.000702834	0.000144441	0.575287	0.142416	0.95814	0.317711	0.699838	0.61036	0.619829	0.342976	0.445553	0.956756	0.0965705
FFR-rs549570746	T	C	0.00100922	-0.00169454	0.000370171	-5.12061e-05	-0.00199737	-0.00152556	-0.000198784	-0.00380772	-0.0186088	-0.00270943	-0.0021216	-0.000298209	0.00226706	0.000430243	5.19017e-05	0.000821761	0.000818769	0.00028075	0.00202536	0.0056008	0.00115216	0.00112064	0.000225456	0.454786	0.389583	0.323841	0.0150747	0.06243	0.478917	0.0601066	0.000892235	0.0186937	0.0583327	0.185941
FFR-rs560795703	C	A	0.00102294	-0.000451435	-0.000206169	-1.74864e-05	0.000396271	6.82659e-05	-0.000222652	0.00165739	0.00369001	-0.000210861	-0.000258732	-0.000209971	0.000438107	0.000308864	2.78386e-05	0.000442401	0.000440411	0.00015043	0.00105701	0.00289942	0.00061312	0.000600436	0.000123307	0.302813	0.504448	0.529918	0.370399	0.876817	0.138848	0.116883	0.203136	0.730911	0.666537	0.0886042
FFR-rs56353819	C	T	0.0526091	0.000287009	0.000340457	1.82365e-05	-0.00015288	0.000359847	-0.000121659	0.00154944	0.00212407	0.000218485	0.000100915	-3.79014e-05	0.000439825	0.000289686	2.67772e-05	0.000425839	0.000424005	0.000145115	0.00102967	0.00276173	0.000590897	0.000578493	0.000119415	0.514046	0.239892	0.495844	0.719589	0.396057	0.401829	0.132381	0.441829	0.711569	0.861516	0.750947
FFR-rs56375023	G	A	0.00601475	0.000930309	0.000175456	-1.20382e-06	8.30476e-05	-0.000218787	1.59276e-05	0.00189515	0.00550264	-0.000176196	0.00033984	0.000112593	0.000608929	0.000284684	2.94056e-05	0.000467326	0.000465339	0.000159342	0.00114149	0.00304291	0.000654452	0.000637486	0.000129732	0.126569	0.537684	0.967345	0.858953	0.638236	0.920377	0.0968689	0.0705536	0.787755	0.593969	0.385456
FFR-rs57062879	G	A	0.0583118	-3.00827e-05	-0.000297688	-7.38775e-06	0.000955305	1.06563e-05	-9.63955e-05	0.000278051	-0.00180056	-4.43651e-05	0.000505773	0.00019525	0.000331156	0.000319525	2.50388e-05	0.000397725	0.000395934	0.000135449	0.000962692	0.00266333	0.000554148	0.000541112	0.000111325	0.927619	0.351515	0.767954	0.01631	0.978528	0.476668	0.772714	0.499006	0.93619	0.349949	0.0794542
FFR-rs572698518	T	TA	0.0106478	0.000979287	0.000734875	5.65732e-05	0.00204832	7.26376e-06	-0.000559208	-0.000237993	-0.0102663	0.0013253	0.00139749	2.49612e-05	0.00249375	0.000456378	5.50783e-05	0.000872515	0.000868241	0.000300794	0.00208758	0.00535234	0.00121597	0.00118048	0.000242675	0.694545	0.107348	0.304356	0.0188957	0.993325	0.0630135	0.909234	0.0551013	0.275753	0.236483	0.918075
FFR-rs57347370	G	T	0.0549556	0.000267592	0.000138934	-3.22175e-06	9.03689e-05	-0.000235828	-0.000287599	-0.00130597	-0.00265802	0.000882043	-0.000158382	0.000180249	0.000581241	0.000285744	2.90895e-05	0.000462249	0.000460317	0.000157612	0.00112283	0.00300851	0.000645746	0.000628933	0.00012912	0.645244	0.626814	0.911812	0.845003	0.608429	0.0680441	0.24479	0.376968	0.171964	0.801176	0.162722
FFR-rs574392601	C	CT	0.00261224	-0.00120244	0.000185469	-4.35867e-05	-0.00036698	-0.000166662	-9.42471e-06	0.000337468	0.002169	-0.000246628	-0.000261443	0.000117012	0.000489404	0.000282617	2.73711e-05	0.000435337	0.000433286	0.000148541	0.00105246	0.0027481	0.000605319	0.000594404	0.000121203	0.0140132	0.511661	0.111289	0.39924	0.700501	0.94941	0.748479	0.429952	0.683689	0.660054	0.334335
FFR-rs58450014	G	GA	0.0297879	0.000207784	0.000179005	3.54154e-05	-0.000106715	0.00016371	0.000132391	-0.00024499	-0.00116815	0.000675682	0.000307849	-0.000271513	0.000334685	0.00032049	2.52107e-05	0.000401516	0.000399835	0.000137135	0.000973547	0.00262757	0.000559865	0.000547943	0.000111481	0.53471	0.576479	0.160089	0.790409	0.682215	0.334341	0.801315	0.656629	0.227486	0.574236	0.014873
FFR-rs586936	G	A	0.00236876	0.00042924	0.000259872	1.62137e-05	0.000767446	-0.000631095	0.000216454	0.000358512	-0.000969225	0.000141831	0.000210083	-0.000195764	0.000388958	0.000296755	2.59619e-05	0.00041186	0.000410091	0.000140717	0.000983094	0.00263414	0.000574301	0.000561995	0.000114886	0.269784	0.381188	0.532287	0.062412	0.123827	0.123996	0.715353	0.712913	0.804937	0.708542	0.0883857
FFR-rs59985551	C	T	0.00220499	-0.000258375	0.000291665	1.4572e-05	0.000314808	0.00050824	0.000175228	-0.000496907	0.000667952	0.000432102	-0.000514552	0.000110435	0.000642244	0.000287224	2.9896e-05	0.000476615	0.000474626	0.000162804	0.00114781	0.00315846	0.000666501	0.000649663	0.000133281	0.687463	0.309888	0.62596	0.50893	0.28425	0.28179	0.665075	0.832513	0.516784	0.428345	0.407343
FFR-rs6032942	G	C	0.00335225	-0.000163087	-0.000142192	2.22245e-05	-0.000206699	-0.000190197	-7.20664e-06	0.00150032	0.00354208	-0.000271978	0.00044324	0.000109572	0.000624093	0.000286609	2.98148e-05	0.000472466	0.000470267	0.000161021	0.00116032	0.00324184	0.000657828	0.000643656	0.000131552	0.793847	0.619813	0.456021	0.661757	0.685885	0.964302	0.196004	0.274565	0.679279	0.491058	0.404891
FFR-rs60568503	G	A	0.00398867	-6.27959e-05	-0.000126772	3.75287e-05	0.000484044	-0.000149525	0.000130973	-0.000150344	0.00619505	0.000461293	0.000377279	8.55258e-05	0.000406146	0.000289945	2.59724e-05	0.000413325	0.000411452	0.000140769	0.00099493	0.00267631	0.000575852	0.000561539	0.000115158	0.877126	0.661948	0.148475	0.241561	0.7163	0.352159	0.879889	0.0206263	0.423098	0.501671	0.457676
FFR-rs61535675	T	C	0.00200321	0.000186491	0.000166584	7.56126e-05	2.75208e-05	-0.000193384	0.000353031	0.000683762	-0.0019267	0.000426113	0.00011377	-0.000136652	0.000789977	0.000302446	3.27316e-05	0.000520829	0.000518651	0.000177178	0.00125778	0.00337635	0.000724161	0.000708205	0.000146133	0.813377	0.58178	0.0208846	0.957859	0.709253	0.0463147	0.586698	0.568241	0.55625	0.872373	0.349729
FFR-rs62062567	T	G	0.0185668	-0.000389402	0.000484182	-1.20495e-06	-0.000356078	0.000426725	-2.14656e-05	-0.000712194	0.00195091	-0.000168907	-0.000618748	0.000260338	0.000370745	0.000305003	2.56591e-05	0.000409012	0.000407297	0.000139523	0.000993687	0.00273862	0.000570006	0.000557009	0.000113625	0.293572	0.112409	0.962545	0.383984	0.294778	0.877728	0.473549	0.476235	0.766983	0.26664	0.0219537
FFR-rs62126405	A	G	0.00276732	-0.000746404	-0.000367241	2.42833e-05	0.00141255	-3.34972e-05	0.000123692	0.000690389	0.00533515	0.000178872	0.000553312	0.000213705	0.00101803	0.000321019	3.60622e-05	0.000574024	0.000571701	0.00019632	0.00138484	0.00369199	0.00080307	0.000780543	0.000157351	0.463446	0.25263	0.500711	0.0138645	0.953277	0.528661	0.618108	0.148442	0.823742	0.4784	0.174423
FFR-rs62164518	A	G	0.239525	-0.000849353	0.000641874	-5.38188e-05	0.000217015	-0.000287476	0.000114342	-2.02649e-05	0.00546876	0.000985088	0.000538961	-0.000222586	0.00150213	0.000368155	4.28269e-05	0.000684518	0.000681516	0.000232421	0.00163972	0.00466735	0.000959969	0.000940607	0.00019139	0.571779	0.0812499	0.208878	0.751218	0.673158	0.622748	0.990139	0.241316	0.304815	0.566651	0.244832
FFR-rs62191107	T	C	0.00690737	-0.000801712	7.91193e-05	1.53734e-05	-0.000389626	-0.000344093	0.000242865	-0.000494559	-0.00136854	-0.000633724	0.000349252	-0.000167159	0.000727842	0.000294064	3.14878e-05	0.000499733	0.000497336	0.000170348	0.00119771	0.0032345	0.000696968	0.000678846	0.000138877	0.270684	0.787888	0.625384	0.435587	0.489018	0.153957	0.679665	0.672217	0.363215	0.606918	0.22873
FFR-rs62201154	T	C	0.0172441	0.000319831	0.000454681	4.71314e-05	-0.000532141	-2.75445e-05	7.1868e-05	-0.00142675	-0.00696916	7.13174e-05	-0.00143523	0.000179415	0.00180675	0.000393348	4.65839e-05	0.00073831	0.000735364	0.000251391	0.00178057	0.00514018	0.00102632	0.00100578	0.000207662	0.859493	0.247713	0.311658	0.471061	0.970121	0.774969	0.422966	0.175158	0.944601	0.153588	0.387603
FFR-rs62213732	T	C	0.128015	0.000329162	-2.07585e-05	3.42013e-05	0.00033674	-0.000148175	-0.000165286	-0.000999862	-0.00350346	0.000178367	0.000851162	6.92276e-05	0.000407433	0.000286882	2.58059e-05	0.000410973	0.000409298	0.000140429	0.000994699	0.00269609	0.000573017	0.000562395	0.000114136	0.419155	0.942316	0.185063	0.412574	0.717336	0.239195	0.314807	0.193788	0.755591	0.130166	0.544161
FFR-rs62275495	C	T	0.0340876	0.000185112	0.000232894	-1.51781e-05	-5.56046e-06	0.000569962	-8.65212e-05	-0.00113562	-0.00522438	-0.000702272	-0.00100567	-3.12262e-06	0.000363961	0.000304717	2.5549e-05	0.000406309	0.000404518	0.0001383	0.000980854	0.00269385	0.000565444	0.000552783	0.000113056	0.61103	0.444691	0.552462	0.989081	0.15884	0.531576	0.246951	0.0524575	0.214245	0.0688701	0.977965
FFR-rs62316308	C	A	0.000471162	-0.000812977	0.00017216	-1.47525e-06	-0.000240734	0.0012256	-0.00013235	0.000857025	0.00225331	-0.000895551	-0.000741367	-0.000106314	0.000564334	0.00028367	2.86651e-05	0.000455876	0.000453877	0.000155423	0.00110344	0.00306943	0.000634598	0.000619445	0.000126878	0.1497	0.543916	0.958955	0.597451	0.00692863	0.394465	0.437347	0.462881	0.158186	0.231378	0.402076
FFR-rs62404667	A	G	0.010775	-0.00057414	-2.94934e-05	3.02324e-05	-0.000655738	-7.57553e-05	-0.000212323	0.000689984	0.00146837	-0.000453481	-0.000658949	1.22633e-05	0.000333159	0.00031764	2.50691e-05	0.000398433	0.000396571	0.00013603	0.000965374	0.00261957	0.000554197	0.000540945	0.000110388	0.0848321	0.926022	0.227834	0.0998083	0.848506	0.118559	0.474775	0.575113	0.413206	0.223171	0.911543
FFR-rs62817	G	C	0.018574	0.000267349	-0.000480473	-1.00933e-05	0.0004401	0.00103845	-1.36309e-05	-0.00130167	0.00228644	0.000159902	0.000965033	2.19637e-05	0.000353193	0.000307208	2.53766e-05	0.000402677	0.000400846	0.000137554	0.000974735	0.00271987	0.00056388	0.000550772	0.000112339	0.449083	0.11782	0.690823	0.274424	0.00958062	0.921063	0.181744	0.40055	0.776736	0.0797513	0.844993
FFR-rs630505	T	C	0.0223813	0.000757627	-6.54784e-05	7.35406e-06	0.000994155	0.000950187	0.00024364	0.000274542	0.00396105	0.000456705	0.000455773	1.42318e-05	0.000546996	0.000281856	2.82433e-05	0.000449488	0.000447428	0.000153693	0.00108788	0.00294367	0.000627027	0.000613333	0.000126029	0.166033	0.816296	0.794569	0.0269851	0.0336993	0.112913	0.80076	0.178427	0.466391	0.457418	0.910091
FFR-rs648674	A	G	0.00600355	-3.95317e-05	-0.00011268	-1.00538e-05	0.000439779	0.000688097	0.000237882	0.000274867	0.000146444	0.000356579	2.73626e-05	0.000241754	0.000368151	0.000298596	2.54211e-05	0.000403602	0.000401809	0.000137515	0.000970264	0.00258866	0.000560776	0.000550297	0.000112875	0.914488	0.705902	0.692482	0.275876	0.0868065	0.0836559	0.776954	0.954887	0.524864	0.960343	0.0322131
FFR-rs659398	C	T	0.00450732	9.933e-05	-5.49983e-05	4.81841e-05	0.00128044	0.00125688	0.00012451	0.00198714	0.00468195	0.000979368	0.000374287	-4.17187e-05	0.000550142	0.000284855	2.85595e-05	0.000453841	0.000451811	0.000155175	0.00110762	0.00294819	0.000633318	0.000619688	0.000126221	0.856718	0.846901	0.0915768	0.00478268	0.00540515	0.422332	0.0728034	0.112271	0.122009	0.54585	0.741007
FFR-rs6658835	A	G	0.292435	0.00062686	0.000405736	1.19778e-05	0.000732778	0.000562794	-1.61221e-05	-0.000347202	-0.00051907	-0.000764723	0.000628595	0.00011194	0.000549395	0.000283062	2.84022e-05	0.000451526	0.000449441	0.000153521	0.00108514	0.00290796	0.000627537	0.000614424	0.00012544	0.253871	0.15175	0.673229	0.104614	0.210496	0.916364	0.748999	0.858331	0.222995	0.30628	0.372192
FFR-rs6809164	T	G	0.00936303	-0.000634182	0.000136325	-5.49698e-06	0.000497798	0.000875559	0.000139883	-0.00142257	-0.00144274	-0.000192914	0.00055029	0.000250251	0.00053861	0.000281819	2.81436e-05	0.000447609	0.000445657	0.000152363	0.00107575	0.00290102	0.000622211	0.000608415	0.000124529	0.239021	0.628575	0.845144	0.266085	0.0494564	0.358575	0.186036	0.618962	0.756527	0.36575	0.0444785
FFR-rs6837466	G	A	0.498655	0.000914068	-0.000262952	2.13586e-05	0.000483172	-0.00109932	7.87702e-05	0.000877824	-0.00201926	6.34104e-05	7.32769e-05	-0.000236701	0.000884993	0.000309655	3.42375e-05	0.000543843	0.000541467	0.000185597	0.00132406	0.00363563	0.000757292	0.000741575	0.000148988	0.301674	0.395783	0.532736	0.374305	0.0423305	0.671263	0.507345	0.578616	0.933269	0.921287	0.112126
FFR-rs6873255	C	T	0.00188296	-0.000155299	0.000440876	8.58274e-06	-0.000210339	-0.000401607	-1.63875e-05	-0.00126329	-0.00241256	0.000291475	-0.000970526	2.28312e-05	0.000609841	0.00028594	2.94835e-05	0.000468768	0.000466686	0.000159612	0.00113352	0.00303479	0.000655398	0.000643364	0.000130174	0.79899	0.123112	0.770973	0.653644	0.389486	0.918224	0.265071	0.426633	0.656515	0.131424	0.860773
FFR-rs6928024	G	A	0.00245832	0.000901556	-0.000768457	1.31625e-05	-0.000563652	-0.000153778	-0.000157631	-0.00166997	0.000299402	-0.000604162	-0.000221276	7.93244e-06	0.000572292	0.00028408	2.87715e-05	0.000457049	0.000455173	0.000155262	0.00110005	0.00301136	0.000634233	0.00062042	0.000126992	0.115179	0.0068295	0.647322	0.217488	0.73548	0.309984	0.128994	0.920802	0.340801	0.721351	0.950194
FFR-rs6974217	T	C	0.00165459	-0.000287678	-0.000130108	1.64818e-05	-0.000211312	-2.18068e-05	2.50903e-05	0.000550539	0.00437584	0.000912952	-3.39253e-05	0.000309256	0.000455974	0.000281828	2.66998e-05	0.000424098	0.000422202	0.000144245	0.00103021	0.0028657	0.000590349	0.000576877	0.000118101	0.5281	0.644327	0.537036	0.6183	0.958807	0.861911	0.593071	0.12677	0.121996	0.953105	0.00883138
FFR-rs6996156	T	C	0.00806822	-3.35861e-05	0.000222002	1.24497e-05	-0.00015883	0.000256264	1.12411e-05	-0.000815225	0.00311181	0.000582255	-0.000682193	-2.058e-05	0.000384262	0.000295477	2.56765e-05	0.000408613	0.000406834	0.000139906	0.000986705	0.00267455	0.000569389	0.000557832	0.000114267	0.930351	0.452454	0.627771	0.697495	0.528762	0.935961	0.408686	0.244633	0.306501	0.221356	0.85707
FFR-rs7087356	T	A	0.00183498	8.04249e-05	-9.02423e-05	-6.99682e-06	-0.000206203	-8.80538e-05	-1.9907e-05	0.00219816	0.00785666	0.000312741	-0.000174983	8.11725e-05	0.000326463	0.000323235	2.50455e-05	0.000397733	0.000396046	0.000135757	0.000957595	0.00261946	0.000555572	0.00054281	0.00010987	0.80541	0.780103	0.779966	0.604147	0.824056	0.883419	0.0217055	0.00270601	0.573492	0.747177	0.460028
FFR-rs7101653	C	T	0.00320825	0.000169446	1.57903e-05	2.04767e-06	-0.000260476	-0.000130988	0.000102478	-0.00152486	-0.00337318	0.000509406	-0.00056015	-3.00415e-05	0.000639348	0.00029206	3.0294e-05	0.000482324	0.000480303	0.000164531	0.0011612	0.00317356	0.000674962	0.000659246	0.000134767	0.790987	0.956883	0.94611	0.589168	0.785068	0.533383	0.189124	0.287829	0.45042	0.395503	0.823603
FFR-rs7118465	T	C	0.113631	0.000432036	4.85007e-05	2.9371e-05	0.000270092	0.000324286	3.99269e-05	0.000900487	0.000765908	0.000522637	-0.000252654	0.000115435	0.000467954	0.00028231	2.69827e-05	0.000428168	0.000426405	0.000145759	0.00102236	0.00273484	0.000596142	0.000583765	0.000119304	0.355881	0.863595	0.27637	0.528166	0.446949	0.784143	0.378431	0.779435	0.380652	0.66516	0.333263
FFR-rs71374021	G	GCTC	0.0606766	-7.33656e-05	-0.000393469	3.15822e-05	1.39833e-05	0.000638589	0.00010001	-0.000304712	-0.000454231	0.000192018	8.01825e-05	-4.82931e-05	0.00034094	0.000320449	2.54852e-05	0.000405013	0.000403173	0.000138104	0.000977283	0.00261229	0.000563951	0.00055226	0.000111991	0.829622	0.219498	0.215259	0.972458	0.113216	0.468964	0.755197	0.861958	0.73349	0.884561	0.666307
FFR-rs71379361	C	T	0.0114124	0.000249481	-0.00014751	5.52852e-07	-0.000132422	0.000388868	0.000129754	-0.000322355	-0.00192937	0.000154577	0.000331122	2.51457e-05	0.000451062	0.000284257	2.67017e-05	0.00042475	0.000422708	0.000144895	0.00103442	0.00275906	0.000590203	0.00057541	0.000117827	0.580197	0.603808	0.983481	0.755221	0.357603	0.370519	0.755323	0.484374	0.793395	0.564985	0.831006
FFR-rs71398609	CAA	C	0.00521914	-0.000396554	0.000213318	-2.83187e-05	-0.00110513	-0.000846187	-8.34898e-05	-0.000326102	-0.00294282	-0.0011028	-0.000814994	-1.29558e-05	0.00035978	0.000334198	2.66739e-05	0.000424951	0.000423434	0.000144905	0.00102808	0.00283384	0.0005942	0.000580554	0.000117354	0.270371	0.52328	0.28839	0.00930668	0.0456758	0.5645	0.751095	0.299058	0.0634653	0.160375	0.912093
FFR-rs714989	A	G	0.00750046	-0.00150707	-0.000116256	-4.19134e-05	-0.00126238	-0.000131727	0.000225659	0.000803537	0.000807124	-0.00152144	-0.00129731	-3.22689e-05	0.00082608	0.000303062	3.31124e-05	0.000527147	0.000524869	0.000179622	0.00128431	0.00344369	0.000733481	0.000716138	0.000148052	0.0680997	0.701272	0.205588	0.016633	0.801837	0.209009	0.531542	0.814692	0.0380555	0.0700607	0.827463
FFR-rs7183859	C	T	0.00208849	0.00175026	-0.000759469	4.55149e-05	-0.000150405	-0.000266046	-1.61859e-05	-0.00157298	-0.000565732	0.000831558	0.00057022	0.000147612	0.000810543	0.000301704	3.29509e-05	0.00052361	0.000520975	0.000177698	0.00125038	0.00336175	0.000725861	0.00071555	0.000145379	0.0308227	0.0118278	0.16719	0.773924	0.609583	0.927424	0.208395	0.866359	0.251956	0.425512	0.309937
FFR-rs720390	G	A	0.00255449	-0.000144587	-0.000105583	1.46142e-06	0.000345981	-1.98234e-05	0.000340658	-0.00172129	0.00196434	-2.7281e-05	0.000181479	0.000173513	0.000403689	0.00028767	2.58418e-05	0.000410637	0.000408724	0.000139809	0.000992456	0.00270769	0.000572124	0.000559315	0.000114628	0.72022	0.713599	0.954902	0.399483	0.961317	0.0148275	0.0828527	0.468166	0.961968	0.745586	0.130103
FFR-rs7216619	A	C	0.00879739	0.000126838	9.08208e-05	-7.03776e-06	0.000659441	-0.000506046	9.17754e-05	0.00091855	-0.00492113	0.00137571	0.00111191	-0.00011335	0.000461723	0.000284452	2.68862e-05	0.000428266	0.000426316	0.000145924	0.00103243	0.00284059	0.000595625	0.000582534	0.000118986	0.783542	0.749512	0.793506	0.123612	0.235221	0.529397	0.373628	0.0831985	0.0209067	0.0562974	0.34078
FFR-rs72673441	C	A	0.00884603	2.48223e-05	-0.00022598	1.57214e-05	-1.46936e-05	-0.000137284	-0.000632322	-0.00373339	0.00389017	-0.000154686	0.000600567	5.7967e-05	0.00266775	0.000462428	5.60959e-05	0.000889099	0.000884641	0.000303614	0.00210508	0.00584825	0.00123667	0.00120488	0.00025158	0.992576	0.625068	0.779279	0.986814	0.876675	0.0372845	0.0761458	0.505932	0.900458	0.618171	0.817772
FFR-rs72731149	G	C	0.0043836	0.00215955	0.000158828	-6.46843e-05	0.000787247	0.00106285	-6.68321e-05	0.00389311	0.000265244	0.00265674	0.000902728	0.000301373	0.00202727	0.000418778	4.97756e-05	0.000792464	0.000788796	0.000271412	0.00194238	0.00579019	0.00110147	0.00107989	0.000224102	0.286765	0.704491	0.193768	0.320508	0.177843	0.805498	0.0450394	0.963462	0.0158674	0.403187	0.178691
FFR-rs72800993	G	C	0.0012408	0.00038423	-0.000301102	-3.27539e-05	0.000494139	0.00031008	-0.000154253	0.00224035	0.0139365	0.00114403	0.000320866	-1.83268e-05	0.000927586	0.000320034	3.54978e-05	0.000563794	0.000560638	0.000191453	0.00135138	0.00375604	0.000787321	0.000766446	0.000155635	0.678709	0.346786	0.356164	0.380786	0.580207	0.42042	0.0973546	0.000206973	0.146207	0.675479	0.906262
FFR-rs72810013	G	A	0.1126	0.00160981	-0.000169457	-6.44189e-06	-0.000407811	-0.000539826	-0.000229732	0.000300266	7.90099e-05	-0.00107956	-0.000531517	0.000227147	0.000798904	0.00029976	3.27595e-05	0.0005194	0.000517015	0.000176941	0.00127781	0.0034926	0.000722786	0.000707041	0.000144493	0.0439041	0.571863	0.844108	0.432362	0.29643	0.194168	0.814221	0.981952	0.135282	0.452204	0.115948
FFR-rs72850968	G	A	0.00869644	-0.000465208	-0.000441105	-4.04517e-06	-0.000566525	-0.000140172	0.00031093	0.000877818	-0.00239551	0.000464069	6.56505e-05	-0.000170013	0.000872394	0.000308323	3.4027e-05	0.000540024	0.000537788	0.000184329	0.00132529	0.00392235	0.00074581	0.000732873	0.000151036	0.593858	0.15253	0.905369	0.294146	0.794366	0.0916403	0.507741	0.541377	0.533788	0.928621	0.260319
FFR-rs7285566	G	A	0.00142027	-0.00166134	-0.00011992	1.79115e-05	-0.000627884	0.00102644	5.36504e-05	-0.000445328	-0.00053669	-0.000507024	0.000731808	0.00021834	0.000636324	0.00028824	3.00175e-05	0.000477066	0.000475088	0.000162404	0.00115547	0.00315256	0.000663657	0.000649272	0.000132481	0.00903283	0.677379	0.550707	0.18813	0.0307339	0.741135	0.699936	0.864822	0.444878	0.259694	0.0993376
FFR-rs72907878	G	A	0.00187766	0.000538072	-0.00037518	7.55267e-08	0.00110286	0.000249659	-2.49739e-05	-0.000463974	-0.00679413	0.000449907	0.000451698	0.000182236	0.00106902	0.000324829	3.69478e-05	0.000585642	0.00058296	0.000199968	0.00140077	0.00382588	0.000816695	0.000798329	0.00016189	0.614732	0.248088	0.998369	0.0596783	0.668461	0.900611	0.740472	0.0757616	0.581712	0.571528	0.260304
FFR-rs7297403	C	T	0.00924375	0.00114046	0.000126945	-4.41901e-05	-0.000458082	0.000148232	7.12492e-05	-0.00226861	-0.00536887	-0.000983851	-0.000413515	-5.61718e-05	0.00075504	0.00029654	3.18989e-05	0.000507531	0.000505283	0.000172583	0.00121696	0.00333346	0.000707679	0.000693618	0.000142858	0.130926	0.668589	0.165957	0.366756	0.769244	0.679724	0.0623	0.107268	0.164455	0.551062	0.694172
FFR-rs7306438	C	T	0.00282831	-2.45845e-05	4.63437e-05	2.29988e-05	-0.000196957	-0.000330998	-0.000213945	0.000494833	0.000808622	0.000185783	-0.000187531	-7.79191e-05	0.000349579	0.00030719	2.52466e-05	0.000400749	0.000398909	0.00013686	0.000963988	0.00263751	0.000556869	0.000545812	0.000111343	0.943934	0.880084	0.362315	0.623093	0.406677	0.117997	0.607729	0.759159	0.738667	0.731162	0.484046
FFR-rs73158393	C	G	0.0210985	0.000333544	3.33857e-06	-6.81991e-05	-0.000838154	0.000503956	0.000233038	-2.19726e-05	0.000579702	-0.000623215	-0.000196029	-4.06148e-06	0.000561713	0.000282406	2.8441e-05	0.000454009	0.000451917	0.000154831	0.00109706	0.00300535	0.000630971	0.000616357	0.000126092	0.552648	0.990568	0.0164895	0.0648765	0.264787	0.132296	0.984021	0.847045	0.323297	0.750452	0.974304
FFR-rs7332827	A	G	0.000950579	0.000300343	8.85769e-05	-2.89249e-05	-0.000140182	-0.000672765	8.54162e-06	-0.000405746	-0.000465979	-0.000852748	-0.000442652	0.000154237	0.000508864	0.000281225	2.7557e-05	0.000439396	0.000437343	0.000149517	0.00105658	0.00285897	0.000612728	0.000598339	0.000122603	0.555042	0.752786	0.293886	0.749702	0.123977	0.954443	0.700966	0.870528	0.164009	0.459422	0.208388
FFR-rs745948842	GA	G	0.00138937	-0.000547265	-0.000108322	-2.93472e-05	-0.000971581	-0.000154157	8.63363e-05	0.000780827	0.00526633	-0.00110731	-0.000324595	-0.000118126	0.00071128	0.000292793	3.12302e-05	0.000495885	0.000493801	0.00016907	0.00120486	0.00318214	0.000688366	0.000674136	0.000138123	0.441652	0.711411	0.34737	0.0500806	0.7549	0.609595	0.516943	0.0979329	0.107704	0.630164	0.392429
FFR-rs750065349	G	GC	0.00465635	7.77105e-05	-0.000122103	1.54385e-05	0.000434772	9.8183e-05	0.000115363	-0.000750479	0.000685299	0.000300978	-0.000118777	3.80594e-05	0.000348659	0.000305766	2.5142e-05	0.000399301	0.000397558	0.000135902	0.000965449	0.00260819	0.000555155	0.000544702	0.0001106	0.823626	0.689647	0.539181	0.276228	0.804935	0.395954	0.436961	0.792744	0.587715	0.827384	0.730758
FFR-rs7541409	A	T	0.00535776	-0.00128885	-0.000135616	-7.22892e-05	-0.000920806	0.000658331	-0.000140381	-0.000846895	-0.00730894	-0.000768448	-0.00149837	-0.000206149	0.00110795	0.00032971	3.75548e-05	0.000596265	0.000593331	0.000202658	0.00144783	0.0038209	0.000832929	0.000811555	0.000164548	0.244721	0.680839	0.0542437	0.12252	0.267194	0.4885	0.558589	0.0557643	0.356225	0.0648519	0.210273
FFR-rs75793379	C	T	0.0113757	0.000935938	2.30126e-05	3.65269e-05	0.000246622	-0.000217261	-0.000125111	0.00133234	-0.00271876	0.00127179	0.00197954	-0.000502114	0.00114654	0.000331665	3.78271e-05	0.000602576	0.000599868	0.000205748	0.00146411	0.00398696	0.000837326	0.000818149	0.000164892	0.41432	0.944683	0.334231	0.682335	0.717217	0.543135	0.362824	0.495295	0.128798	0.0155417	0.00232649
FFR-rs75951061	A	G	0.00455184	-0.00124942	0.000154013	-2.36806e-05	-5.79701e-05	-0.000236468	-0.000177625	-0.00057023	-0.00629042	-0.00094135	-0.000174276	4.33678e-05	0.00141821	0.000361726	4.21889e-05	0.000668704	0.000666359	0.000227621	0.00161972	0.00446776	0.000934702	0.000912165	0.000184556	0.37833	0.670274	0.574593	0.930918	0.722691	0.435184	0.724798	0.159145	0.313883	0.848481	0.814221
FFR-rs7642504	T	C	0.148569	0.000437467	0.000430306	2.50788e-05	0.000208568	0.00026707	5.39128e-05	-0.0023178	-0.0013194	0.000474964	-0.000311689	4.78067e-05	0.00034596	0.000315055	2.5447e-05	0.000404323	0.000402524	0.000137808	0.000974824	0.00263255	0.000565353	0.000552263	0.000112294	0.206052	0.171999	0.324366	0.605963	0.507019	0.695637	0.0174236	0.616239	0.400844	0.572493	0.670306
FFR-rs764455513	G	GA	0.00381888	-0.00254951	-3.99065e-05	-2.34409e-06	-0.000511818	0.000144476	-0.000146093	-0.000979662	-0.00775184	-0.000376701	-0.000367752	-0.00020581	0.00115479	0.000334052	3.80258e-05	0.000606614	0.000603828	0.00020754	0.00144798	0.00390364	0.000840459	0.000824612	0.000169316	0.0272613	0.904909	0.950846	0.398822	0.810899	0.481479	0.498677	0.0470571	0.654003	0.65562	0.224164
FFR-rs7655890	T	G	0.0372657	-0.000204431	-0.000216697	4.44757e-05	-0.000150825	0.000163297	-6.63965e-05	0.00320118	-0.00167994	0.000713598	0.00031546	1.80789e-05	0.000473334	0.000281728	2.69787e-05	0.000429063	0.000427052	0.000145923	0.00103759	0.00277522	0.000596478	0.000582862	0.000119733	0.665817	0.441792	0.0992418	0.725197	0.702178	0.649103	0.00203434	0.544957	0.231561	0.588353	0.879981
FFR-rs767450450	TA	T	0.00419124	-0.00105559	-0.000336557	2.01738e-06	0.000127782	0.000956311	-0.000122637	0.000165606	0.00641895	4.93636e-05	0.00124551	0.000117439	0.000975325	0.000319105	3.58164e-05	0.000567497	0.000565605	0.00019329	0.00135641	0.00390772	0.00078644	0.000771834	0.000157709	0.279123	0.291568	0.955082	0.821849	0.0908813	0.525776	0.902827	0.10046	0.949951	0.106596	0.456481
FFR-rs76751100	A	G	0.148868	-0.00256569	5.54277e-05	-2.31953e-05	0.00124974	-5.66964e-05	0.000550368	9.78927e-05	0.000574873	0.0011089	-0.00185898	0.000242673	0.00247473	0.000448137	5.41196e-05	0.000859045	0.000856108	0.000295591	0.00208887	0.00547474	0.0011942	0.00116839	0.000238015	0.29985	0.901565	0.66822	0.145725	0.947198	0.0626155	0.962622	0.916372	0.35311	0.1116	0.307934
FFR-rs7711879	T	G	0.00226665	-0.0006588	-0.000530961	-4.21851e-05	-0.000134957	0.000368469	-0.000209968	0.00103373	0.00499888	0.00028602	-0.00066602	9.73746e-05	0.000522776	0.000284844	2.80876e-05	0.00044669	0.000444736	0.000152015	0.00107699	0.00291655	0.000619746	0.000606105	0.000123808	0.2076	0.0623171	0.133121	0.762555	0.407382	0.167209	0.337138	0.0865356	0.644432	0.271835	0.431579
FFR-rs7726839	A	G	0.00771654	0.000125607	-9.63117e-05	5.183e-05	0.000956024	0.000494173	-6.05303e-06	0.000577898	-0.00208559	0.000228809	-0.000304216	-7.06952e-05	0.000547797	0.000282078	2.83752e-05	0.000450163	0.000448219	0.000153446	0.00109494	0.00296665	0.000627684	0.000615001	0.000123926	0.81864	0.732775	0.0677625	0.0336941	0.270234	0.968534	0.597646	0.482049	0.715463	0.620841	0.568364
FFR-rs77273565	A	G	0.00903289	-0.00492425	0.00117534	7.0474e-05	0.00187942	0.000759371	-7.45838e-05	0.0024354	-0.000998392	0.00225184	0.00137442	0.000393842	0.00217489	0.000430109	5.13238e-05	0.000814458	0.000810703	0.000277382	0.00195253	0.00519039	0.00114255	0.0011104	0.000229283	0.0235669	0.00628306	0.169715	0.0210238	0.348923	0.788019	0.212288	0.847465	0.0487381	0.215803	0.0858519
FFR-rs7753012	T	G	0.00171744	1.08448e-05	0.000153595	6.762e-05	-0.00109152	-0.000859764	-0.000395393	-0.000492647	-0.000355833	-0.000265821	-0.000152887	5.37787e-05	0.000491697	0.000285157	2.73371e-05	0.000434116	0.000432171	0.000147699	0.00105288	0.00279679	0.000604527	0.000592042	0.000120451	0.982403	0.590142	0.0133782	0.0119258	0.0466577	0.00742882	0.639853	0.898759	0.660142	0.796224	0.655254
FFR-rs777473824	A	ATCTGTG	0.00416358	0.000129582	0.000233381	2.83066e-05	0.000142558	0.00062699	3.03309e-05	9.60005e-05	-0.00115815	0.000859826	0.000664467	-4.35104e-05	0.000442146	0.000308952	2.80449e-05	0.00044454	0.000442703	0.000151631	0.00106581	0.00292145	0.000616311	0.000604487	0.000123079	0.769466	0.450012	0.312818	0.748448	0.156696	0.841456	0.92823	0.691788	0.162984	0.271672	0.723702
FFR-rs78442819	G	C	0.00744301	0.00214453	0.000193541	-2.59276e-05	0.000804463	0.000616429	-9.81951e-05	0.000923336	0.00108721	-0.000114929	0.000884213	-2.58646e-05	0.000782177	0.000305667	3.30187e-05	0.000524454	0.000522092	0.0001786	0.00128367	0.00344842	0.000732046	0.000715463	0.000145474	0.00611203	0.52662	0.432314	0.125054	0.237727	0.582453	0.47196	0.752552	0.875248	0.216513	0.858884
FFR-rs79003723	T	A	0.0565706	-0.000548343	-3.79475e-05	-4.42287e-07	0.000779315	-0.00110226	-7.0014e-05	-8.43466e-05	-0.00730536	0.00103145	0.00149429	0.000260993	0.00139941	0.000357123	4.152e-05	0.000660069	0.000656418	0.000224424	0.00157786	0.00440839	0.000920408	0.000901618	0.000184837	0.695178	0.915377	0.991501	0.23774	0.0931144	0.755062	0.957368	0.097491	0.262441	0.097453	0.157948
FFR-rs79234094	G	A	0.00806923	-0.000155774	-0.000471529	-4.74687e-06	-0.000414739	0.000352146	8.29416e-06	0.000481239	0.00152046	-3.60481e-05	-0.000744662	0.000109164	0.000566527	0.00028424	2.87181e-05	0.000457096	0.000455109	0.000155521	0.00110708	0.00299665	0.000636884	0.000624759	0.000126897	0.783345	0.0971356	0.868714	0.364231	0.439073	0.957468	0.663787	0.611884	0.954863	0.233295	0.389647
FFR-rs7962469	G	A	0.03818	0.000379638	0.000649466	-4.22405e-05	-0.000875729	-0.000374561	0.000196956	0.000854056	-0.00201229	-0.000871705	-0.00104878	-0.000109466	0.00043089	0.000288579	2.65363e-05	0.000421842	0.000419748	0.000143665	0.00102582	0.00286727	0.000587683	0.000573321	0.000116395	0.378288	0.024414	0.111432	0.0378985	0.372208	0.170397	0.405093	0.482797	0.138	0.0673575	0.346982
FFR-rs796422920	C	CTTTTTTTTTTT	0.0190429	0.000220129	-0.000282069	-4.36805e-05	0.000754745	-1.10786e-05	0.000259825	-0.000806169	-0.00379639	-0.000254038	0.000574722	0.000173812	0.000906498	0.000317518	3.50706e-05	0.000558027	0.00055542	0.000190166	0.00134578	0.00366499	0.000778667	0.000756837	0.000154696	0.808134	0.37435	0.212949	0.176209	0.984086	0.171844	0.54915	0.300272	0.744238	0.447631	0.261196
FFR-rs7968719	G	C	0.496227	-7.12327e-06	-9.27819e-05	3.00993e-05	0.000883027	8.25872e-05	0.000152291	0.000943033	-0.000769404	-0.000152411	0.000427387	-0.000109168	0.00033731	0.000313036	2.50171e-05	0.000397556	0.000395954	0.000135637	0.000959881	0.00263495	0.000553487	0.000542131	0.000110332	0.983152	0.76693	0.22892	0.0263428	0.834778	0.261532	0.32588	0.770287	0.783036	0.430496	0.322449
FFR-rs79898473	T	C	0.0028314	1.10133e-05	0.000176765	-4.53788e-07	-0.000303376	-0.000110432	-8.9686e-05	-0.000217542	0.000821139	-0.000189605	6.59539e-05	-0.000110201	0.000453387	0.000284794	2.67157e-05	0.000425702	0.000423852	0.000145042	0.00102912	0.00280153	0.00059244	0.000579428	0.000118713	0.98062	0.534814	0.986448	0.476065	0.794445	0.53635	0.832586	0.769443	0.748938	0.909376	0.353253
FFR-rs7997798	G	A	0.00262533	6.46778e-05	0.000271136	-1.71614e-05	-0.000292772	8.37742e-05	0.0002686	-0.00155503	-0.00348841	-0.000604025	-0.000281494	-7.06759e-05	0.000451412	0.000282344	2.66321e-05	0.000423035	0.000420984	0.000143967	0.00102378	0.00278922	0.000588619	0.000576838	0.000118299	0.88607	0.336903	0.519325	0.488891	0.842266	0.062084	0.128785	0.211054	0.304812	0.625554	0.55022
FFR-rs8009811	G	T	0.00101531	0.00037276	-0.000143367	4.47081e-05	0.000323224	0.000370726	-4.2936e-06	-0.00122583	-0.0024094	0.000154688	-0.000360743	-0.000105414	0.000384676	0.000295839	2.56914e-05	0.000409293	0.000407374	0.000139618	0.00100429	0.00271354	0.000570641	0.000558235	0.000113959	0.332535	0.627952	0.0818255	0.429697	0.362803	0.975467	0.222243	0.374586	0.786331	0.518139	0.354963
FFR-rs80275182	A	G	0.000653333	-0.000519076	-1.17846e-05	-1.71188e-06	-0.000829734	0.000552877	7.51607e-05	0.00140721	0.00456947	-0.00012418	-0.000684181	4.03202e-05	0.000810332	0.000301433	3.28813e-05	0.000522668	0.000520363	0.00017809	0.00129029	0.0036042	0.000729843	0.000713662	0.000144672	0.521802	0.968814	0.958479	0.112402	0.288018	0.672999	0.275443	0.204865	0.864896	0.337716	0.780475
FFR-rs8032790	G	C	0.000976958	-0.000246962	9.00098e-06	-2.7704e-06	0.000700505	0.000256715	0.000342454	-0.00202161	0.00346865	-0.000621968	-0.00107042	-0.000101138	0.000837551	0.000304222	3.33738e-05	0.000529927	0.000527725	0.000180279	0.00126902	0.00355615	0.000740259	0.000725419	0.000148597	0.7681	0.976397	0.933843	0.186206	0.626644	0.0574893	0.111151	0.329365	0.400796	0.140056	0.496114
FFR-rs848541	C	T	0.17781	0.000275263	0.000163273	2.97746e-05	-0.000750288	-0.00153807	-0.000102166	-0.000664459	-0.00616647	-0.00149665	-0.000754164	-0.000264167	0.000487871	0.000284135	2.73932e-05	0.000435843	0.000433887	0.000148593	0.00104461	0.0028089	0.000606176	0.000593769	0.000121387	0.57261	0.565542	0.277067	0.0851681	0.000392908	0.491736	0.524724	0.0281411	0.0135504	0.204041	0.0295391
FFR-rs873590	G	T	0.0205512	1.94149e-05	-0.000289108	-1.77178e-05	-9.75339e-05	0.00064781	-0.000173741	4.66578e-05	-0.000920562	-0.00037695	-0.00157567	2.28522e-05	0.000663833	0.00028835	3.03824e-05	0.000482889	0.000480768	0.000163926	0.00116044	0.00311546	0.000671456	0.000656248	0.000134719	0.976668	0.316042	0.559786	0.839933	0.177838	0.289201	0.967928	0.767626	0.574531	0.0163503	0.865303
FFR-rs9274454	T	G	0.0199509	-0.0036234	0.000804567	7.1638e-05	0.000475526	0.000534153	-5.87871e-05	-0.000144103	0.00121337	-0.000778221	0.000446971	1.30314e-05	0.000872901	0.000325375	3.51565e-05	0.000559299	0.000556541	0.000190261	0.00127503	0.00299665	0.0007787	0.000764423	0.000155257	3.31207e-05	0.0134091	0.0415827	0.395205	0.33717	0.757336	0.910016	0.685544	0.317611	0.558739	0.933109
FFR-rs9525927	A	G	0.000255634	-0.000149634	-3.38263e-05	2.40399e-05	0.000967791	0.000280353	0.000237535	-0.00257743	-0.00253141	-0.000329199	0.00126215	2.65957e-05	0.000775809	0.000299109	3.23862e-05	0.000514823	0.000512469	0.000175391	0.00125239	0.00343308	0.000719999	0.000703366	0.000142962	0.847057	0.909959	0.457915	0.0601297	0.584336	0.175638	0.0395909	0.460905	0.647513	0.0727461	0.852419
FFR-rs9592985	G	A	0.00155665	0.000140264	0.000375519	2.02171e-05	1.17288e-05	3.4182e-05	-0.000130947	0.00230403	0.006152	0.000833914	0.000591545	0.000158475	0.00080321	0.00029922	3.26103e-05	0.000519251	0.000516947	0.00017648	0.00124907	0.00345297	0.000720425	0.000704564	0.000144998	0.861371	0.209483	0.535285	0.981979	0.94728	0.458092	0.0650965	0.074807	0.247058	0.40114	0.27442
FFR-rs9610955	G	C	0.131227	-0.000224412	-0.000368776	3.56566e-07	0.000686724	-0.000349937	-1.50543e-05	0.00119038	0.00863347	0.000753816	0.000972226	-0.000107646	0.000739311	0.000295946	3.167e-05	0.000505333	0.000503005	0.000171954	0.00120616	0.00335827	0.00070096	0.00068697	0.000140536	0.761477	0.212732	0.991017	0.174163	0.486622	0.930235	0.323685	0.0101468	0.282195	0.157001	0.4437
FFR-rs9647648	G	C	0.00306874	0.000510589	-0.00107549	-1.11318e-05	7.8135e-05	-0.000200156	-1.68353e-05	-0.000432983	0.00206548	0.000335188	9.6633e-05	-6.79469e-05	0.000377569	0.000347794	2.78119e-05	0.000442098	0.000440055	0.000151266	0.00106078	0.00290918	0.000616095	0.000603061	0.000122588	0.176279	0.00198624	0.688971	0.859715	0.649223	0.911382	0.683147	0.477713	0.586406	0.872694	0.579394
FFR-rs9654093	G	C	0.00567969	0.000893037	0.000303542	-0.000125234	0.00121647	9.61767e-05	9.37178e-05	0.00295845	0.00146047	0.00157055	0.000190252	0.000225583	0.00118968	0.000339109	3.90076e-05	0.000617839	0.000614506	0.000209812	0.00149925	0.00391537	0.000864002	0.000837463	0.000171431	0.452863	0.370725	0.00132527	0.0489646	0.875631	0.655111	0.0484643	0.709142	0.0691038	0.820287	0.188217
FFR-rs9783497	G	A	0.00161265	4.20623e-05	8.82159e-06	-4.62485e-05	0.000195726	-0.000324157	4.95422e-05	0.00176831	0.000705964	0.000875036	0.000670821	4.87406e-05	0.000413911	0.000286474	2.59903e-05	0.000413727	0.000411835	0.00014088	0.000997722	0.00265485	0.000576747	0.00056437	0.000114969	0.919057	0.975434	0.0751674	0.636156	0.431222	0.725092	0.0763379	0.790305	0.129221	0.234592	0.671606
FFR-rs9853018	C	T	0.00147882	-1.05936e-05	-6.50179e-05	-7.7737e-06	-7.99375e-05	-0.000628108	-0.000111836	-0.000147377	-0.00603447	4.28192e-05	0.000146353	4.97311e-05	0.000351503	0.000304496	2.51586e-05	0.000399641	0.00039776	0.000136285	0.000962646	0.00262732	0.000557877	0.000543877	0.000111548	0.975957	0.830916	0.757331	0.841463	0.114312	0.411871	0.878323	0.0216305	0.938819	0.78786	0.655722
FFR-rs9890574	A	T	0.0031877	0.000226649	0.000165542	-1.53751e-05	0.0001243	0.000246853	0.000128896	0.000820523	0.00117245	0.000181661	0.000167149	-9.52292e-05	0.000565845	0.000283163	2.86634e-05	0.000455305	0.000453376	0.000155336	0.00110739	0.00297196	0.000636558	0.000619915	0.000125651	0.688752	0.558807	0.591681	0.784851	0.586113	0.406661	0.458722	0.693209	0.775354	0.787443	0.448521
glucose-12:27935698_TA_T	TA	T	0.0050992	0.0053779	-0.00111621	0.000311594	0.0213336	0.00658134	0.00172586	0.0507171	-0.164071	0.0661628	0.0360843	0.00122438	0.0119751	0.0053273	0.000552422	0.00883757	0.00886288	0.00297202	0.018842	0.0543615	0.013121	0.0122606	0.00251158	0.653367	0.834037	0.57272	0.0157809	0.457741	0.561442	0.00710939	0.00254352	4.60043e-07	0.00324999	0.62591
glucose-13:80717841_ATG_A	ATG	A	0.0278677	0.00877147	-0.00345397	0.00116747	0.0126477	0.00797887	0.000402798	0.0328304	0.0667402	0.0409522	0.0234864	-0.0013341	0.00930312	0.00515975	0.000504166	0.00803462	0.00805539	0.00269687	0.0170386	0.0481583	0.0118761	0.0111444	0.00228034	0.345758	0.503236	0.0205781	0.115453	0.321931	0.881272	0.0540033	0.165794	0.000564323	0.03508	0.558517
glucose-15:77832144_TG_T	T	TG	0.0127012	0.0193185	0.0016423	4.95765e-05	0.0013551	0.00165289	-0.00255693	-0.0323628	-0.118516	0.00670006	0.00727946	0.0046882	0.00939797	0.005071	0.000498887	0.00797164	0.00798447	0.0026842	0.0169177	0.0482047	0.0117887	0.011099	0.00227225	0.0398222	0.746043	0.920841	0.865018	0.835999	0.340801	0.0557547	0.013949	0.569801	0.511912	0.039092
glucose-17:46972479_ATCTC_A	A	ATCTC	0.00102776	0.0103944	-0.00106593	2.26831e-05	0.00248371	-0.00242149	-0.00114327	0.109591	0.469733	0.0158874	0.0153473	-0.00077323	0.00611162	0.00563361	0.000449248	0.00717275	0.00718981	0.00241324	0.0150638	0.0434351	0.010607	0.00996161	0.0020487	0.0889895	0.849929	0.959731	0.72914	0.736272	0.635679	3.47338e-13	2.98223e-27	0.134182	0.123406	0.705858
glucose-rs10670873	GCACAA	G	0.00095222	0.0308616	0.00108778	0.000742897	0.00279211	0.00202619	-0.000659524	0.154309	0.598543	0.0308855	0.0337953	0.00203559	0.0139685	0.00539048	0.000579153	0.00926498	0.00928926	0.00311584	0.0197043	0.0562637	0.0137531	0.0128452	0.00265761	0.0271494	0.840076	0.199588	0.763139	0.827335	0.832366	4.85218e-15	2.00916e-26	0.0247239	0.00851521	0.44371
glucose-rs10842685	T	C	0.342771	0.00553343	-0.00637094	0.000693126	0.0109728	0.000158456	-0.00598638	0.136421	0.196119	0.0482159	0.0404172	0.00436757	0.00619944	0.0056139	0.000452133	0.00722067	0.00724028	0.00242935	0.015151	0.043684	0.0106881	0.0100502	0.00206114	0.372089	0.25644	0.125274	0.128603	0.982539	0.013733	2.19095e-19	7.14312e-06	6.45254e-06	5.78509e-05	0.034092
glucose-rs10930133	T	A	0.0758955	0.00471767	-0.000532043	0.000168105	0.00468927	-0.00604117	-0.0041857	0.0621157	0.0146761	0.0508303	0.0280937	0.00471772	0.0074985	0.00515858	0.00046772	0.00745313	0.00747096	0.00251078	0.0157391	0.0455683	0.0110048	0.0103614	0.00213523	0.529252	0.917854	0.719285	0.52924	0.418734	0.0954982	7.92981e-05	0.747401	3.861e-06	0.00670141	0.0271441
glucose-rs10965246	T	C	0.274545	-0.0115004	-0.00465858	9.26511e-05	0.0297153	0.00316984	-0.00222288	0.103087	0.348118	0.0671905	0.0362101	0.00401512	0.0147019	0.00546166	0.000590739	0.00943249	0.00944916	0.00317542	0.020343	0.0569499	0.0139729	0.013162	0.00272367	0.434075	0.393682	0.875372	0.00163114	0.737276	0.483911	4.0351e-07	9.81259e-10	1.52131e-06	0.00594031	0.140442
glucose-rs11039165	A	G	0.00184804	0.0135988	-0.00307877	-0.000236461	0.00464669	0.00112822	-6.68393e-05	-0.111706	-0.276548	0.00707976	-0.0267999	-0.000537599	0.0097397	0.0050755	0.000505541	0.00806995	0.00809232	0.0027122	0.0169848	0.0489604	0.0118755	0.0111494	0.00229329	0.162648	0.544121	0.639972	0.56475	0.889119	0.980339	4.81613e-11	1.62142e-08	0.551065	0.0162309	0.814657
glucose-rs11257655	C	T	0.149447	0.0053996	0.00708431	-0.000201318	-0.00876611	9.47242e-05	0.00588901	0.0203369	-0.0860275	-0.0326577	-0.0311592	-0.00904528	0.0124548	0.00525202	0.000553343	0.00882454	0.00884519	0.00297899	0.0180608	0.0512578	0.0129958	0.0122242	0.00252895	0.664626	0.177379	0.715992	0.320527	0.991456	0.0480601	0.260155	0.0932842	0.0119743	0.0108054	0.000348101
glucose-rs11626777	C	T	0.00351684	0.00530883	0.00385701	0.000124061	-0.00543343	0.00371559	-0.0025176	-0.0127625	0.0683193	-0.0124777	0.00552876	0.00251018	0.00756716	0.00518423	0.000469075	0.00749714	0.00751377	0.00252126	0.0157361	0.0454467	0.0110361	0.0104015	0.0021417	0.482954	0.456884	0.791411	0.468616	0.620951	0.318013	0.417348	0.132767	0.258215	0.595049	0.241178
glucose-rs116782923	A	T	0.226149	-0.147596	0.0105575	-0.00146748	-0.0481484	-0.0230727	0.0181961	-0.36947	-0.979591	-0.216623	-0.0833744	-0.0049644	0.0481565	0.00830452	0.000994662	0.0159469	0.015985	0.00530905	0.0305699	0.088574	0.0235502	0.0219923	0.00448513	0.00217756	0.203626	0.140118	0.002534	0.14891	0.000609569	1.28188e-33	2.00426e-28	3.68324e-20	0.000150059	0.268357
glucose-rs11720108	C	T	0.0151266	0.00230328	-0.0104833	0.000407913	-0.00222132	0.0159993	-0.00185125	0.0327267	0.142292	0.0295389	0.0156125	0.00264191	0.0105612	0.00515545	0.000520542	0.00829055	0.00831485	0.00278119	0.0175981	0.0495424	0.0122606	0.0115128	0.00235752	0.82736	0.0420085	0.433258	0.78875	0.0543325	0.505647	0.0629332	0.00407757	0.015986	0.175071	0.262448
glucose-rs11839569	A	G	0.0232165	0.00577577	0.0116818	-0.000514346	-0.0161085	-0.000236884	-0.00174655	-0.0149128	0.263582	-0.0249316	-0.0151986	0.00450661	0.0152735	0.00549554	0.000601633	0.00958963	0.00961168	0.0032234	0.0198675	0.0564947	0.0141028	0.013255	0.00274318	0.705315	0.0335313	0.392598	0.0930001	0.980338	0.587933	0.452887	3.0788e-06	0.0770887	0.251538	0.100418
glucose-rs12146652	A	C	0.0388673	-0.00637334	0.00643735	-0.00123778	-0.00531447	-0.00148592	0.000910073	0.0575179	0.240084	-0.0185375	-0.014737	-0.00372756	0.00717331	0.00521961	0.000462177	0.00737626	0.0073953	0.00248329	0.015301	0.0440145	0.0108979	0.0102038	0.00211253	0.374284	0.217465	0.00740339	0.471229	0.840756	0.714008	0.000170566	4.91217e-08	0.0889413	0.148665	0.0776511
glucose-rs12219514	A	G	0.00729729	0.00738226	-0.00051026	0.000527486	0.00669864	0.00940779	-0.00490725	0.0493677	-0.16258	0.0608931	0.039747	-0.000976609	0.0064773	0.00544769	0.00045378	0.00723743	0.00725515	0.00243438	0.0153219	0.0439747	0.0106907	0.0100328	0.0020569	0.254407	0.925375	0.245064	0.354678	0.194734	0.0438207	0.00127303	0.000218114	1.2297e-08	7.44514e-05	0.634933
glucose-rs12555274	G	C	0.217915	0.00273555	-0.00218334	0.000136437	-0.012203	-0.00979155	0.00411464	-0.0376067	-0.00531772	-0.0327156	-0.0269729	-0.00281925	0.0105613	0.00515472	0.000522225	0.0083342	0.00835032	0.00279735	0.0170734	0.0482165	0.0122733	0.0115666	0.00237219	0.795624	0.671886	0.793891	0.14314	0.240959	0.141318	0.0276207	0.912181	0.0076863	0.0197039	0.234654
glucose-rs1260326	C	T	0.0514779	0.00575044	-0.00307246	0.000541336	0.0181403	0.00201572	0.00126825	0.0732873	0.0718567	0.0676904	0.0245683	-0.00455531	0.00700364	0.00527563	0.000458267	0.00731365	0.00733089	0.00245726	0.0154363	0.0434184	0.0107531	0.0101644	0.0020968	0.411611	0.560306	0.237497	0.0131267	0.783346	0.605768	2.05839e-06	0.0979294	3.0839e-10	0.0156465	0.0298195
glucose-rs12702068	T	C	0.609018	0.0301421	-0.0158902	-0.000673896	-0.0119715	-0.0101877	0.00336745	0.0068756	-0.257563	-0.0205849	-0.0142581	-0.000317522	0.00747519	0.0053203	0.000465398	0.00741639	0.00743287	0.00249455	0.015559	0.0446633	0.0109012	0.0102702	0.0020921	5.52568e-05	0.00282021	0.147619	0.106487	0.17049	0.177042	0.658558	8.09171e-09	0.0589866	0.165051	0.879367
glucose-rs13100823	C	T	0.00651632	-0.0142898	0.00251683	-0.000639635	-0.00630794	-0.0176122	0.00271464	0.0696909	0.146976	-0.0376097	-0.0285506	-0.00206214	0.00850773	0.00507145	0.000484733	0.0077236	0.0077386	0.00259651	0.0158545	0.0448052	0.0113748	0.0107095	0.00220549	0.0930314	0.619702	0.186983	0.414095	0.022854	0.295795	1.10488e-05	0.00103697	0.000945301	0.00767878	0.34979
glucose-rs13266634	C	T	0.157585	0.0182408	0.000527009	-8.36101e-07	0.000409844	-0.00108068	-0.00554244	-0.0630077	-0.00817332	0.0390868	0.0160288	0.00136871	0.00863906	0.00510818	0.000483831	0.00774788	0.00777114	0.00260389	0.0165925	0.0471501	0.0114681	0.0107744	0.00220888	0.0347367	0.917829	0.998621	0.957814	0.8894	0.0332951	0.00014629	0.862379	0.000653875	0.136839	0.535498
glucose-rs148527516	A	AG	0.00613267	0.000614153	0.00036828	0.000372314	0.00971792	0.0256173	0.000732233	-0.0579575	-0.180196	0.0424433	0.02737	0.00041321	0.0163423	0.00561888	0.000620259	0.00987664	0.00990002	0.00333182	0.0214948	0.0577646	0.0146375	0.013756	0.00281496	0.970022	0.947741	0.548336	0.325151	0.00966533	0.826051	0.00701092	0.00181187	0.00373652	0.0466289	0.883297
glucose-rs149643430	CACACAG	C	0.879074	-0.00562029	0.00141405	-0.00014044	-0.00687246	-0.00397513	0.00068428	0.0512333	0.541793	-0.0418378	-0.0162301	-0.000862989	0.00714666	0.00571164	0.000485704	0.00776356	0.00777892	0.00261147	0.0160434	0.0456336	0.0114892	0.0107746	0.00221886	0.431622	0.804465	0.772469	0.376039	0.609342	0.7933	0.00140622	1.68387e-32	0.000271172	0.131987	0.697326
glucose-rs17168486	C	T	0.706991	-0.0111779	0.00573773	-0.000135353	-0.012132	-0.00740907	-0.00138709	-0.0263958	0.0359731	-0.0380089	-0.0287607	-0.00134528	0.0150516	0.00550117	0.000598186	0.00955278	0.00957759	0.00320358	0.0195876	0.0550151	0.0140792	0.0132588	0.00267925	0.4577	0.296949	0.82099	0.204086	0.439178	0.665028	0.177795	0.513192	0.00694215	0.0300702	0.615591
glucose-rs1985469	A	T	0.0251057	0.0362035	-0.0339969	-0.000741392	0.00377572	0.0027315	0.00196157	0.0655802	0.321991	0.0203616	0.0225898	-0.000426769	0.0146678	0.00573039	0.000585847	0.00935641	0.00937833	0.00315018	0.0192457	0.0558795	0.0137839	0.0129314	0.00265802	0.0135792	2.98372e-09	0.205692	0.686549	0.770855	0.533491	0.000655687	8.31149e-09	0.139624	0.0806575	0.872441
glucose-rs200740678	G	A	0.999993	-0.0193081	-0.00562417	-0.00104601	0.0262444	0.00693219	-7.68279e-05	0.0500686	0.393706	0.0159102	0.0173842	0.00553007	0.0160806	0.0057569	0.000629492	0.0100542	0.0100703	0.00337074	0.0212304	0.0593107	0.0148213	0.0139378	0.00286977	0.229866	0.328598	0.0965811	0.00904725	0.491214	0.981816	0.0183574	3.18708e-11	0.283064	0.212302	0.0539813
glucose-rs2075423	G	T	0.215222	0.00484117	-0.0011421	0.000754097	0.00541395	0.00187307	-0.00305547	0.00255162	-0.184044	0.0264689	0.0258159	0.00141696	0.0081034	0.00514864	0.000479258	0.00764807	0.00766806	0.0025732	0.0161806	0.0467482	0.0112864	0.01061	0.00216849	0.550225	0.824449	0.115612	0.479018	0.807022	0.235062	0.874696	8.25546e-05	0.0190182	0.0149683	0.51348
glucose-rs2169387	G	A	0.0446748	0.0202189	0.00240208	-0.00038601	-0.014564	0.00544673	0.012609	-0.0295491	-0.139885	-0.0274207	-0.0184368	-0.00498658	0.0256176	0.0064944	0.000749534	0.0120126	0.0120344	0.00400721	0.0251885	0.0713416	0.0179716	0.0166013	0.00341264	0.429961	0.71148	0.606553	0.225363	0.650839	0.00165212	0.24075	0.0499056	0.127069	0.26676	0.143961
glucose-rs2237895	A	C	0.378827	-0.00524704	0.00323077	-0.00116574	-0.021291	-0.00551586	0.0033082	-0.00086624	0.0542174	-0.043468	-0.0276991	-0.00092691	0.00670541	0.00534115	0.000454159	0.00725346	0.00727275	0.00244004	0.0151151	0.0431085	0.0106921	0.0100302	0.00207022	0.433917	0.545257	0.0102641	0.00333265	0.448196	0.175166	0.954299	0.208503	4.79704e-05	0.0057533	0.654345
glucose-rs2255805	T	C	0.00606116	-0.00228591	0.00355877	-0.000653049	-0.00787811	-0.00984431	0.00135564	-0.0498384	0.00415658	-0.033443	-0.0332107	0.00119091	0.00669219	0.00540767	0.000458033	0.00731734	0.00733492	0.00245825	0.0151478	0.0443049	0.0107758	0.0101349	0.00209314	0.732669	0.510476	0.153937	0.281644	0.17956	0.581314	0.00100157	0.925254	0.00191271	0.00104996	0.569384
glucose-rs2396083	C	G	0.0178572	-0.0112985	0.00226335	-0.000384127	-0.0132556	0.000701042	-0.000226874	-0.117055	-0.405901	-0.0582507	-0.0363407	-0.00121787	0.00866034	0.0051363	0.000489368	0.00781898	0.00783835	0.00262657	0.016172	0.0465386	0.0115347	0.0108769	0.0022315	0.19202	0.659461	0.432486	0.090018	0.928734	0.931167	4.56397e-13	2.75654e-18	4.42272e-07	0.000834697	0.585231
glucose-rs2519093	C	T	0.00506834	0.00352088	0.00264185	0.000295588	-0.00409361	0.00834294	0.00376642	-0.0470485	-0.161447	0.01366	-0.0218574	-0.00220805	0.0139765	0.00538959	0.00057981	0.00923502	0.00925857	0.00310611	0.0191179	0.0562159	0.0134825	0.0128529	0.00264967	0.801107	0.624009	0.610191	0.65757	0.367534	0.225289	0.013857	0.0040803	0.310981	0.0890249	0.404659
glucose-rs28463558	T	C	0.0821606	0.000413773	-0.00363977	0.000306557	0.00112523	-0.00591008	-0.00134624	-0.0108375	0.0482568	0.0275526	0.0280256	-0.00234547	0.00648153	0.00542971	0.000452774	0.00722654	0.00724281	0.0024293	0.0152013	0.0435983	0.0106437	0.0100005	0.00206663	0.949099	0.502639	0.498366	0.876263	0.414505	0.579464	0.475887	0.26836	0.00963666	0.00507274	0.256411
glucose-rs2972156	G	C	1	0.00260406	-0.00171757	0.000224055	0.0151295	0.017594	-0.00355237	0.0239732	0.107547	0.0316342	0.0352582	0.00130099	0.00770209	0.00514461	0.000469796	0.00752086	0.00753964	0.0025255	0.0159762	0.0447571	0.0111592	0.0104613	0.00215942	0.73529	0.738487	0.63342	0.044256	0.0196211	0.159547	0.133472	0.0162658	0.00458604	0.000750934	0.54686
glucose-rs3108901	C	A	0.369595	-0.135167	0.00640173	0.000333641	-0.0397258	-0.0258064	6.29591e-05	-0.334391	-0.474784	-0.149865	-0.089268	-0.00674771	0.037404	0.00760705	0.000906841	0.01442	0.0144517	0.00483364	0.0291826	0.0815829	0.0212472	0.0199034	0.00409509	0.000301937	0.400039	0.712936	0.00587143	0.0741494	0.989608	2.17722e-30	5.90606e-09	1.75508e-12	7.29608e-06	0.0994053
glucose-rs34874677	T	C	0.000303112	-0.00301526	-0.0026268	-0.000224502	-0.00767575	-0.00588028	-0.00547218	0.00995162	-0.0575159	-0.0128475	-0.0073645	-0.000455624	0.00935892	0.00510554	0.000500043	0.00800613	0.00802166	0.00269078	0.0166707	0.0472571	0.0117914	0.0111274	0.00227085	0.747317	0.606903	0.653457	0.337694	0.463529	0.0419853	0.550539	0.223573	0.275909	0.508079	0.84098
glucose-rs35323862	C	T	0.041956	0.00848318	-0.00696641	0.000879629	0.00832997	0.0116929	-0.00511953	0.140358	0.163205	0.0417146	0.0368287	0.00134317	0.0109462	0.00515335	0.000529722	0.00842809	0.0084524	0.00283446	0.0178587	0.0515643	0.0124552	0.0117242	0.00239797	0.438348	0.176433	0.0968055	0.322978	0.166548	0.0708929	3.87725e-15	0.00155059	0.00081079	0.00168263	0.575394
glucose-rs36106955	T	C	0.0132337	0.00844366	-0.00454418	0.00073617	0.0103281	-0.0017993	-0.00132863	0.0405953	-0.173719	0.0329647	0.0398451	-0.00180961	0.0139022	0.00541799	0.000582325	0.00927901	0.00930444	0.00311249	0.0196149	0.0548005	0.0136908	0.0128795	0.00264968	0.543613	0.401627	0.206163	0.265684	0.846661	0.669474	0.0384892	0.00152448	0.0160506	0.0019772	0.494636
glucose-rs3757840	T	G	0.0176534	-0.0371283	0.0336915	0.000448304	0.00279052	-0.00134727	-0.00123182	-0.0722467	-0.346004	-0.012413	-0.00538599	-0.001279	0.00610848	0.00604739	0.000447912	0.00715644	0.00717397	0.00240463	0.0149361	0.0431075	0.0105695	0.00992791	0.00204666	1.21761e-09	2.5322e-08	0.316887	0.696588	0.851034	0.608463	1.3187e-06	1.00732e-15	0.240233	0.587468	0.532025
glucose-rs4238013	T	C	0.0275902	0.0170286	0.00662237	0.000202401	-0.0167913	-0.00339916	-0.00275516	-0.00754658	0.0204763	-0.0355966	-0.0205816	-0.00342986	0.013023	0.00529254	0.000563994	0.00899935	0.00902144	0.00302483	0.0186863	0.0530964	0.0132581	0.0124817	0.00255861	0.191016	0.210839	0.719692	0.0620656	0.706332	0.362376	0.686319	0.699761	0.00725618	0.0991615	0.18008
glucose-rs4689394	G	C	0.00485694	0.00476059	-0.00906006	0.000176483	0.0109263	0.00543892	-0.00708598	0.0772816	0.149535	0.0678062	0.0185203	0.00535394	0.00691392	0.00529259	0.000459576	0.00732321	0.00734056	0.00246523	0.0154122	0.0450892	0.0108233	0.0101481	0.00208049	0.491106	0.0869277	0.700969	0.135698	0.45873	0.00404877	5.32615e-07	0.000911907	3.74318e-10	0.0680029	0.0100716
glucose-rs560887	C	T	0.00842411	-0.0124857	0.00668858	-0.00138659	0.026219	0.00279497	0.00111589	-0.0358076	-0.100587	-0.00153026	0.00314777	0.00100504	0.00924186	0.00549968	0.000488883	0.00779693	0.00782382	0.00261637	0.0162057	0.0470259	0.011504	0.0108251	0.00222476	0.176698	0.223919	0.00456505	0.000771864	0.720913	0.66974	0.0271357	0.032439	0.894178	0.771217	0.651448
glucose-rs56337617	C	T	0.0212533	-0.00770636	-0.00411317	0.000506783	-0.0140218	0.0105252	-0.00265957	0.103316	0.351858	0.0332982	0.0443951	0.00482898	0.0167875	0.00563211	0.000623095	0.00995555	0.0099772	0.00334754	0.0212869	0.060926	0.0147278	0.0138196	0.00285841	0.646196	0.465202	0.416029	0.159002	0.291458	0.426914	1.21374e-06	7.6978e-09	0.0237664	0.00131631	0.0911475
glucose-rs56376363	T	C	0.00364848	0.0184565	-0.00194124	0.000273275	0.0220057	-0.00173637	-0.0045932	0.0554597	0.235563	0.0239045	0.0317236	-0.0026157	0.018023	0.00575095	0.00064217	0.0102558	0.0102778	0.0034407	0.0218742	0.0637648	0.0151881	0.01425	0.00289296	0.30581	0.735701	0.670436	0.0318994	0.865841	0.18189	0.0112327	0.000220592	0.115514	0.0260011	0.365912
glucose-rs61807822	G	C	0.0122286	-0.00600532	-0.000321319	-6.26389e-05	0.00691684	0.00435447	0.00647234	-0.0419998	-0.208892	-0.0082311	-0.0058712	-0.000678247	0.00844438	0.00508621	0.000481978	0.00771139	0.00772885	0.00258595	0.0158244	0.0452278	0.0113319	0.0106858	0.00220166	0.476984	0.949628	0.896596	0.369738	0.57316	0.0123194	0.00795216	3.86445e-06	0.467616	0.582706	0.758036
glucose-rs62448618	A	T	0.0320789	0.0142392	-0.00715995	0.000602375	0.0219301	0.00620283	-0.00455288	0.105143	0.435884	0.0563765	0.0399923	-0.00312473	0.00618563	0.00568814	0.000451703	0.00720846	0.0072262	0.00242248	0.0152195	0.042582	0.0106669	0.00999847	0.00205818	0.0213371	0.208121	0.182348	0.00234825	0.390683	0.0601866	4.91255e-12	1.38037e-24	1.25767e-07	6.34197e-05	0.128967
glucose-rs6538805	T	C	0.0133148	-0.00262662	-0.00225064	0.000824734	0.00423075	-0.0178252	-0.00140398	-0.049555	-0.0497596	-0.00190459	0.0211693	-0.00164313	0.00707262	0.00530221	0.000464224	0.00740289	0.00741831	0.00248346	0.015504	0.0445073	0.010954	0.0102741	0.00211942	0.710356	0.671221	0.0756374	0.567662	0.0162678	0.57185	0.00139238	0.263564	0.861967	0.0393563	0.438179
glucose-rs6808574	C	T	0.0227428	0.00697134	-0.00428648	0.000886968	-0.00310413	0.00541335	-0.00942146	-0.0522495	0.204807	0.0235753	0.0277853	0.00246104	0.0071368	0.00530105	0.000465316	0.00743253	0.00744694	0.00249389	0.0156269	0.0444545	0.0109654	0.0102986	0.00210814	0.328661	0.41874	0.0566306	0.67621	0.467274	0.000158255	0.000827258	4.08521e-06	0.0315581	0.00697718	0.243052
glucose-rs71397670	A	AT	0.00830096	0.0389397	-0.0307752	0.0012007	0.00123987	0.0060597	-0.00189113	0.0519171	0.0569014	0.0163205	-0.000522438	0.000272183	0.0113206	0.00586343	0.000552618	0.00882244	0.00884007	0.00296633	0.0183472	0.0531162	0.0130265	0.0122206	0.00251635	0.000582447	1.53363e-07	0.0298006	0.888237	0.493041	0.523779	0.00465968	0.284052	0.210256	0.9659	0.913864
glucose-rs73001065	G	C	0.214063	0.00932228	0.00797047	-0.00127776	-0.0369254	0.00411691	0.00876952	-0.167303	-0.664119	-0.129026	-0.0917409	-0.0103477	0.0364679	0.00740863	0.000881055	0.0140435	0.0140647	0.00470932	0.0279876	0.0803932	0.0214121	0.0193145	0.00402507	0.798237	0.282001	0.146987	0.00855498	0.769743	0.0625817	2.26585e-09	1.45389e-16	1.68653e-09	2.03772e-06	0.010147
glucose-rs7507912	G	A	0.00750941	-0.00821715	0.00148734	0.000978424	0.00224758	-0.0089208	-0.000393237	-0.0358353	-0.081904	0.029473	0.0138088	-0.000933326	0.00686896	0.00549112	0.000468019	0.00746181	0.00747945	0.00250536	0.0156869	0.0437597	0.0110555	0.0103924	0.00210687	0.231592	0.786497	0.036568	0.763254	0.232985	0.875278	0.0223488	0.0612531	0.00767881	0.183937	0.657772
glucose-rs7644261	C	G	0.0214768	0.00468446	-0.00669866	0.000447201	0.0186346	0.00995704	-0.000385712	0.0900852	0.223766	0.031512	0.0568316	0.00196086	0.0093154	0.00512463	0.000495824	0.00793289	0.00794842	0.00266568	0.0167266	0.046806	0.01171	0.010992	0.00224902	0.615055	0.191163	0.367092	0.018823	0.210314	0.884951	7.22223e-08	1.74795e-06	0.00712395	2.34051e-07	0.38328
glucose-rs7766070	C	A	0.197102	-0.0366978	-0.00489727	-0.00034137	-0.00568469	-0.00785628	0.00576112	-0.0391166	-0.0576117	-0.0469785	-0.0268211	-0.00318689	0.00999571	0.00510533	0.000509602	0.00813211	0.00815057	0.00273337	0.0163504	0.0470399	0.0119218	0.0112311	0.00232295	0.000241326	0.337436	0.502938	0.484526	0.3351	0.0350578	0.0167397	0.220675	8.13358e-05	0.0169371	0.170093
glucose-rs7903146	C	T	0.408299	-0.0338032	0.0100281	-0.00168881	-0.0325851	-0.00456302	0.0151554	0.00707824	0.296018	-0.132979	-0.119514	-0.00453486	0.00921936	0.00518852	0.000495438	0.00788149	0.00790255	0.00265425	0.0158349	0.0458416	0.0115263	0.0109116	0.00224985	0.00024591	0.0532686	0.000652798	3.56038e-05	0.563662	1.13217e-08	0.654875	1.06727e-10	8.87025e-31	6.61121e-28	0.0438409
glucose-rs79165612	A	C	0.00283439	0.000423703	-0.00623096	-0.00041769	0.0399554	-0.00105309	0.00355565	-0.0321897	-0.267042	0.060451	0.0487755	0.00505313	0.0254899	0.00647053	0.000747923	0.0119516	0.0119665	0.00401039	0.0264333	0.0751452	0.0177599	0.0164859	0.00339605	0.986738	0.335561	0.576527	0.000828591	0.929875	0.375291	0.223314	0.000379964	0.00066477	0.00309062	0.136768
glucose-rs9273364	T	G	0.412206	-0.0637251	-0.00518453	0.000743075	0.00253799	0.00227032	0.00224443	-0.312407	-0.421335	-0.128217	-0.070976	-0.00257746	0.00880748	0.00510264	0.000489272	0.00779826	0.00781623	0.00262142	0.0153118	0.0386624	0.0114493	0.0108029	0.00221762	4.65865e-13	0.309607	0.128831	0.744836	0.771462	0.391896	1.91172e-92	1.20022e-27	4.25752e-29	5.04688e-11	0.245131
glucose-rs9937354	G	A	0.00281196	-0.00589474	-0.00246144	-0.000106357	-0.0141158	0.00485134	0.00596554	-0.000952496	0.200052	-0.032508	-0.0331425	-0.00289083	0.00661263	0.00538457	0.000454517	0.00726091	0.00727695	0.0024344	0.0150643	0.0427766	0.010678	0.0100553	0.00205469	0.372695	0.647579	0.814985	0.0518874	0.504982	0.0142656	0.949584	2.91756e-06	0.00233189	0.000980833	0.159448
HbA1c-10:71002040_TG_T	TG	T	0.00315099	0.0588234	-0.0546073	0.000859636	-0.0364919	0.0147127	0.00556497	-0.104008	-0.76249	-0.0701343	0.0816996	-0.0221511	0.0339256	0.027342	0.00230546	0.0368399	0.0368698	0.0123061	0.0713583	0.215986	0.0531015	0.0499219	0.0105149	0.0829384	0.0458049	0.709246	0.321904	0.689862	0.651116	0.144968	0.000415217	0.186584	0.101727	0.0351505
HbA1c-1:219656080_AT_A	A	AT	0.0173896	0.00111509	-0.0242256	-0.000466753	0.0115946	0.0416103	-0.0227993	0.371688	0.0125339	0.103833	0.116528	0.00110684	0.0405268	0.0266083	0.00245418	0.0392056	0.039235	0.0131148	0.0762888	0.223948	0.0566281	0.053207	0.0112225	0.978049	0.362584	0.849163	0.767429	0.288899	0.0821339	1.10488e-06	0.955368	0.066716	0.0285193	0.921435
HbA1c-12:48574444_CTCTT_C	CTCTT	C	0.00377032	-0.171817	0.0652634	0.000834709	0.0548955	0.0278169	0.0179908	0.0678575	0.614098	0.0239539	-0.0447601	0.0129284	0.142551	0.0337279	0.00394358	0.0629065	0.0629175	0.0210207	0.121964	0.371449	0.0909248	0.0856561	0.0179281	0.22809	0.0529917	0.832371	0.382853	0.658404	0.392076	0.577955	0.0982816	0.792206	0.601284	0.470836
HbA1c-12:54622328_GGA_G	GGA	G	0.00518782	0.14694	0.0120117	0.000231054	0.103339	0.0204484	0.0228129	-0.559764	-1.04719	-0.0771599	-0.0498396	-0.0220164	0.128936	0.0320761	0.00373007	0.0596185	0.059649	0.0199437	0.115507	0.338927	0.0858981	0.0808969	0.0169226	0.25444	0.708051	0.950608	0.0830371	0.73174	0.252682	1.25956e-06	0.00200367	0.369041	0.537837	0.193257
HbA1c-13:28471145_TA_T	TA	T	0.00170758	-0.0675769	0.0385972	0.000205721	-0.0260143	-0.0412237	-0.0261338	0.335307	-1.24348	0.152525	0.0959283	-0.0265884	0.059686	0.0259639	0.00271643	0.043476	0.0434918	0.0145265	0.0841951	0.252488	0.0626648	0.05886	0.0124696	0.257549	0.137129	0.939632	0.5496	0.343206	0.0720132	6.82144e-05	8.4457e-07	0.0149349	0.103152	0.0329873
HbA1c-16:28513068_ACT_A	ACT	A	0.0316079	-0.00119941	-0.0106753	0.000447021	-0.0783815	-0.0289007	-0.00240877	-0.00890039	0.708157	-0.00532074	-0.0500834	-0.0108726	0.0400723	0.0254561	0.00237504	0.0379619	0.0379864	0.0126552	0.0731766	0.217407	0.0547632	0.0514646	0.0107916	0.976122	0.674951	0.850707	0.0389486	0.446767	0.849045	0.903193	0.00112496	0.9226	0.330474	0.313695
HbA1c-17:61959890_GGAGGGGT_G	GGAGGGGT	G	0.00585836	-0.0420588	-0.0106587	0.00467396	0.132544	0.0894227	-0.0164663	0.314589	-0.868695	0.11708	0.19178	0.0195361	0.0721872	0.0284286	0.00305421	0.0487273	0.0487358	0.0162789	0.0935142	0.287606	0.0700976	0.0671914	0.0138285	0.56014	0.707713	0.125936	0.00652634	0.0665298	0.311773	0.000768153	0.00252448	0.0948741	0.00431471	0.157734
HbA1c-18:43837892_AT_A	A	AT	0.00037199	-0.0111964	0.00368246	0.000210978	-0.0826957	-0.0737191	0.00141697	0.23029	0.43104	0.0398725	-0.0232847	-0.0230621	0.0512852	0.0260681	0.0026208	0.0418487	0.0418579	0.0139374	0.0807433	0.24279	0.0602124	0.0567524	0.0119213	0.827183	0.887662	0.935838	0.0481487	0.07821	0.919021	0.0043431	0.0758393	0.507846	0.681598	0.0530518
HbA1c-2:175306645_AT_A	AT	A	0.00204526	-0.0490941	0.0150408	-0.00250065	-0.0395653	0.00256409	0.0219516	0.144491	1.43774	0.0521296	0.0189904	-0.0121518	0.0411369	0.0253693	0.00239375	0.0382112	0.0382308	0.0127219	0.073853	0.218112	0.055042	0.0516819	0.0108583	0.232701	0.553267	0.296184	0.300466	0.946527	0.0844379	0.0504119	4.35566e-11	0.343596	0.713286	0.263087
HbA1c-22:32398349_ATT_A	ATT	A	0.0350886	-0.066673	0.00537874	-0.00786446	0.120682	-0.0909869	-0.0308352	0.62022	1.40856	0.289636	0.180994	0.0336808	0.154682	0.0350874	0.00413616	0.0659115	0.0659333	0.021974	0.130397	0.376907	0.0947921	0.0897476	0.0188471	0.666444	0.878165	0.0572522	0.0671054	0.167593	0.16054	1.97186e-06	0.00018615	0.00224734	0.0437286	0.0739304
HbA1c-2:24210076_GATAA_G	GATAA	G	0.00334038	-0.105038	0.0228635	-0.00375881	0.105475	-0.0180006	-0.0119808	0.542159	0.198899	0.168406	0.0279677	-0.0130818	0.0947491	0.0290132	0.00326875	0.052226	0.0522571	0.0174013	0.0992436	0.304544	0.0747444	0.0707206	0.0147815	0.267609	0.430676	0.250177	0.0434279	0.730499	0.491137	4.68847e-08	0.513691	0.0242549	0.692499	0.376154
HbA1c-4:145022433_GT_G	GT	G	0.0088733	0.0211385	-0.0443788	-0.00123092	-0.037715	-0.112396	-0.0215785	0.212365	0.716441	-0.00790631	-0.0531596	-0.0217728	0.043722	0.0257888	0.00246057	0.0393091	0.0393361	0.0131305	0.0754353	0.220278	0.0566099	0.0531094	0.0111765	0.628759	0.0852776	0.616894	0.337334	0.00427246	0.100303	0.00487509	0.00114434	0.888927	0.316854	0.0514072
HbA1c-6:28764264_AAGAG_A	A	AAGAG	0.0171423	-0.0063549	-0.0480566	-0.00210679	-0.205957	-0.105781	-0.0182204	-0.615041	0.320378	-0.220836	-0.195814	-0.0089443	0.132248	0.0346004	0.00400737	0.063831	0.0638473	0.0213701	0.123269	0.382663	0.0916484	0.0868322	0.0183231	0.961674	0.164864	0.599078	0.00125295	0.0975645	0.393875	6.06082e-07	0.402463	0.0159714	0.0241297	0.625449
HbA1c-6:31652205_CT_C	CT	C	0.0577888	0.000577479	-0.0601618	0.00487782	-0.0196523	0.0356636	-0.0140199	-0.797538	-0.558626	-0.265705	-0.126395	0.0153014	0.0592658	0.0271381	0.0028018	0.0447528	0.044755	0.0149286	0.0850718	0.23729	0.0641928	0.0605047	0.0127819	0.992226	0.0266327	0.0816917	0.660569	0.425531	0.347664	6.98894e-21	0.018564	3.48762e-05	0.0367079	0.231263
HbA1c-6:53138203_TA_T	TA	T	0.0012121	-0.0540938	0.00646116	0.00124211	-0.0365036	0.0401391	0.0128546	-0.331462	0.137716	-0.114027	-0.175094	-0.00932644	0.0379172	0.0267747	0.00240269	0.0383949	0.0383999	0.0128198	0.074333	0.22013	0.0552243	0.0519363	0.0109036	0.153688	0.80931	0.605181	0.341737	0.295889	0.316	8.23282e-06	0.53157	0.0389437	0.000748289	0.392358
HbA1c-7:123423500_TATAAC_T	TATAAC	T	0.000610769	0.212413	-0.0135477	-0.000834695	0.077632	0.0718983	-0.00831419	0.450519	2.50169	0.124339	0.260073	-0.0191618	0.163124	0.0350492	0.00414454	0.0662136	0.0662382	0.0221411	0.127653	0.382215	0.095131	0.0896453	0.0190077	0.192864	0.699101	0.840389	0.241019	0.277723	0.707282	0.000416801	5.95181e-11	0.191204	0.00371865	0.313407
HbA1c-7:130438531_CTTTTTT_C	C	CTTTTTT	0.935298	-0.0105743	0.00654834	-0.00383717	0.0406081	0.016869	0.0231901	-0.105679	-0.40976	-0.0759473	-0.0919697	0.00459925	0.0298479	0.0285695	0.00224075	0.0358319	0.0358487	0.011972	0.0693546	0.206201	0.0514902	0.0485023	0.0102322	0.723134	0.818708	0.0868147	0.257091	0.637954	0.0527419	0.127571	0.046903	0.140218	0.0579366	0.653082
HbA1c-9:140100317_C_G	C	G	0.00460781	0.121933	-0.0349299	0.00330826	0.0260917	0.0606343	0.0146479	0.283376	-0.0531447	0.2303	0.149442	-0.00698683	0.0984055	0.029332	0.00333591	0.0530745	0.0530841	0.0177012	0.103654	0.313078	0.0763334	0.0715124	0.0152483	0.215316	0.233716	0.321338	0.622999	0.253359	0.407951	0.00626033	0.865207	0.00255307	0.0366437	0.646806
HbA1c-rs1004558	C	T	0.00726522	0.2361	-0.275245	-0.00194394	0.060769	0.0646828	0.0416085	0.534048	1.07307	-0.00276405	0.0699583	-0.022899	0.0719446	0.0275	0.00291422	0.0465041	0.0465329	0.0155458	0.0885487	0.266474	0.0669123	0.0628449	0.0132412	0.00103202	1.40783e-23	0.504738	0.191301	0.164517	0.00743976	1.63065e-09	5.65331e-05	0.96705	0.265629	0.0837455
HbA1c-rs1005752	A	C	0.128175	0.0916465	-0.0136051	0.000505207	0.0159579	0.0341344	-0.0295913	0.0315462	0.303128	0.230068	0.0600536	0.00818318	0.0470033	0.0253007	0.00249185	0.0398578	0.0398416	0.0133336	0.0782976	0.232808	0.0574291	0.0540367	0.0113755	0.0512022	0.590759	0.839336	0.688884	0.391583	0.0264676	0.687021	0.1929	6.17511e-05	0.266421	0.471913
HbA1c-rs10784889	T	C	0.0309759	-0.051042	0.014206	-0.000682554	-0.0495014	-0.0316249	0.0127002	0.0559173	0.326113	-0.131698	-0.131021	-0.00128871	0.03364	0.0264166	0.00226853	0.0362414	0.036265	0.0120889	0.0695388	0.204613	0.0521416	0.0490867	0.0103484	0.129192	0.590738	0.763506	0.171978	0.383181	0.293457	0.421331	0.110982	0.0115451	0.00760454	0.900895
HbA1c-rs10811660	G	A	0.0834304	-0.0601688	-0.0116602	0.00409443	0.143801	0.0757751	0.00128034	0.215953	0.440147	0.43603	0.261858	0.0207554	0.0742132	0.0271132	0.00294966	0.0471405	0.0471335	0.0157649	0.0948282	0.27696	0.0682761	0.0642779	0.0136207	0.417506	0.667155	0.165106	0.00228509	0.107909	0.935271	0.0227687	0.112015	1.70453e-10	4.62676e-05	0.127558
HbA1c-rs10830963	C	G	0.43472	0.0225781	0.05858	0.00075235	-0.0537925	0.0589816	0.0057743	0.432629	-0.0288606	-0.0942036	-0.0860337	-0.0058515	0.0474788	0.025277	0.00249411	0.0398161	0.0398313	0.0133244	0.0755251	0.228957	0.0573331	0.0539978	0.0114683	0.634403	0.0204762	0.762919	0.176689	0.138665	0.664752	1.01575e-08	0.899691	0.100366	0.111099	0.609889
HbA1c-rs10842987	A	C	0.035767	0.00711713	-0.0375449	0.00537728	0.0908491	0.0765761	-0.016584	0.605911	-0.529677	0.364932	0.291648	0.0161384	0.0641775	0.0262919	0.00279199	0.0446586	0.0446855	0.0149041	0.0877016	0.265701	0.0646036	0.0604206	0.0126439	0.911698	0.153292	0.0541101	0.0419223	0.0865912	0.265832	4.90042e-12	0.0462073	1.61871e-08	1.38762e-06	0.201825
HbA1c-rs10853047	T	C	0.0604501	-0.0915326	0.0150471	-0.00144521	-0.0344172	-0.0743723	0.00894347	-0.000994518	0.185764	-0.218383	-0.1329	-0.0366627	0.0891875	0.0285004	0.00318686	0.0509853	0.0509951	0.0170211	0.0961876	0.287694	0.0731043	0.0688235	0.0145605	0.304754	0.597527	0.650196	0.49965	0.144726	0.599282	0.991751	0.518475	0.00281523	0.0534814	0.0118052
HbA1c-rs10890347	T	A	0.000920286	0.0211941	0.0139291	0.00514478	0.00584912	0.0565383	-0.0346922	0.196655	0.910409	0.101828	0.118195	0.00215631	0.0440549	0.0251382	0.00243647	0.0389022	0.0389297	0.0129573	0.0755863	0.226936	0.0561492	0.0527159	0.0110709	0.630457	0.57951	0.0347245	0.880485	0.146414	0.00741971	0.00927616	6.02918e-05	0.0697536	0.0249556	0.845572
HbA1c-rs10902106	C	T	0.00928097	0.0293891	-0.0364581	-0.000746077	0.0619947	0.0451718	-0.0237464	0.0930595	0.242435	0.0391565	-0.047229	-0.000240366	0.0311259	0.0276864	0.00225122	0.0359374	0.035947	0.0119848	0.0692539	0.204642	0.051812	0.0486924	0.0102572	0.345067	0.1879	0.740336	0.0845157	0.208891	0.0475508	0.179033	0.236146	0.449805	0.332076	0.981304
HbA1c-rs11023353	A	G	0.0273593	0.175926	0.0146944	0.00111311	-0.0339542	-0.196335	0.0110445	-0.215013	0.413075	-0.295381	-0.311815	-0.0219562	0.245109	0.0417589	0.00507331	0.0804315	0.0805904	0.0269416	0.150797	0.426536	0.11493	0.109007	0.0229162	0.472916	0.724924	0.826335	0.672915	0.014843	0.681848	0.153915	0.332825	0.0101683	0.00423012	0.33801
HbA1c-rs11039165	A	G	0.00373204	0.0437115	-0.0204156	0.00335959	0.0389368	-0.0233523	-0.00845542	0.160103	0.215662	0.178046	8.45732e-05	-0.00309261	0.0482869	0.0251967	0.00250925	0.0401128	0.0401455	0.0133906	0.0781156	0.233526	0.0576981	0.0540933	0.0114264	0.365336	0.417798	0.180611	0.331707	0.560775	0.527751	0.040408	0.355747	0.00203025	0.998753	0.786658
HbA1c-rs11065979	C	T	0.747223	0.0304263	-0.0210126	-0.0027386	0.0590158	0.0305282	-0.023334	0.0522622	1.23187	0.0739395	0.142556	0.00633909	0.0320134	0.0271238	0.00225757	0.0359904	0.0360081	0.012017	0.0690163	0.205981	0.0516996	0.0485317	0.0102359	0.341898	0.438522	0.225102	0.101055	0.396542	0.0521688	0.448904	2.22768e-09	0.152669	0.00331052	0.53572
HbA1c-rs1109608	A	G	0.00120075	-0.143908	0.013599	-0.00368929	-0.0432715	0.0621622	0.0154273	-0.216373	-0.27735	-0.118632	-0.0366428	0.000647776	0.102592	0.0298881	0.00341047	0.0542895	0.0543086	0.0180994	0.103565	0.296287	0.0779998	0.0738356	0.0155266	0.1607	0.649112	0.279362	0.425422	0.252371	0.394013	0.0366868	0.349231	0.128281	0.619701	0.966722
HbA1c-rs11204535	A	G	0.0083052	0.146629	0.00716717	0.000228134	0.0310948	0.0433103	0.00806772	0.204135	-0.778115	0.0586896	0.0144255	0.0102008	0.0495998	0.0253774	0.00254477	0.0406562	0.0406804	0.013558	0.0794858	0.235223	0.058804	0.0551364	0.0116181	0.00311455	0.777619	0.928567	0.444377	0.287036	0.551808	0.0102235	0.000939844	0.318255	0.793605	0.379938
HbA1c-rs11257655	C	T	0.0195368	-0.0716724	0.00585239	-0.00672443	-0.128153	-0.042471	0.0214135	-0.176338	-0.57848	-0.318037	-0.213345	-0.0224254	0.0617461	0.0260392	0.00274452	0.0438587	0.0438886	0.0147014	0.0827736	0.245933	0.0630184	0.0593465	0.0125468	0.24574	0.822171	0.0142813	0.00347875	0.333195	0.145239	0.0331422	0.0186643	4.49928e-07	0.000324618	0.0738848
HbA1c-rs113373052	C	T	0.0663428	0.11898	-0.0522209	-0.00318187	-0.0200778	0.00535707	0.00284458	0.0891248	0.798983	-0.0161149	-0.113371	0.016594	0.0426351	0.0254693	0.00241478	0.038546	0.0385783	0.0128746	0.0743575	0.220071	0.0555318	0.0521038	0.0110605	0.00526055	0.0403321	0.187617	0.602451	0.889559	0.825136	0.230685	0.000282865	0.77167	0.0295662	0.133539
HbA1c-rs113832271	ATC	A	0.0303371	0.00984472	-0.0291692	0.00414288	0.129199	0.0571999	-0.0118105	0.239597	-0.0776444	0.225243	0.29608	0.00943094	0.0387294	0.0254454	0.00233832	0.0374753	0.0375062	0.0124958	0.0736414	0.215168	0.0543496	0.0509445	0.0107155	0.799347	0.251654	0.0764398	0.00056574	0.127241	0.344582	0.00113984	0.718208	3.4099e-05	6.19254e-09	0.378796
HbA1c-rs113851927	G	GT	0.360348	-0.0344278	0.0478694	-0.00771695	-0.123722	-0.115269	0.0245282	0.280972	-0.39774	-0.430946	-0.31846	-0.0279332	0.0431848	0.0254544	0.00244358	0.0389801	0.0389799	0.0130077	0.0738564	0.218642	0.0560323	0.0527592	0.01113	0.425324	0.0600286	0.00158845	0.00150379	0.00310554	0.0593407	0.000142242	0.0688917	1.46838e-14	1.58257e-09	0.0120838
HbA1c-rs113978837	A	G	0.000518416	-0.0368534	-0.0333341	-0.00220158	-0.0271926	-0.0442119	-0.00972296	-0.12114	0.54689	-0.0639628	-0.0432533	-0.00487868	0.0460418	0.0251453	0.0024688	0.0394353	0.0394523	0.013162	0.075474	0.223466	0.0565782	0.0533014	0.011205	0.42346	0.184953	0.372522	0.490478	0.262441	0.460082	0.108484	0.0143934	0.258258	0.417089	0.663271
HbA1c-rs11531378	T	C	0.000942319	-0.0279049	-0.0134251	-0.000417056	-0.0092206	-0.0187707	0.00023245	0.134482	-0.200078	0.0693523	-0.0427341	-0.0117372	0.0440002	0.025188	0.00243445	0.038923	0.0389451	0.0129696	0.0747411	0.22618	0.0561548	0.0529187	0.0110525	0.525952	0.594036	0.863976	0.81274	0.629821	0.985701	0.0719725	0.376376	0.216824	0.419356	0.288262
HbA1c-rs11606890	A	C	0.00362462	0.173612	-0.0761726	-0.0046418	0.106341	0.151523	-0.034384	0.532893	0.943889	0.0645639	0.0790963	0.0200905	0.12884	0.0323407	0.00375453	0.0600029	0.0600325	0.0199539	0.115805	0.333945	0.0866941	0.0813403	0.0171576	0.177818	0.0185078	0.216341	0.076351	0.0116026	0.0848586	4.19357e-06	0.00470666	0.456435	0.330847	0.241626
HbA1c-rs11740542	A	G	0.000718037	0.133088	0.00628605	-0.00045278	0.00477859	-0.0313501	-0.0107271	0.355901	0.76761	0.0839814	-0.0016895	-0.024392	0.0711431	0.0268589	0.00290858	0.0464936	0.0465188	0.0155213	0.0897699	0.278996	0.0669954	0.063353	0.0132097	0.0613865	0.814954	0.876293	0.918138	0.500361	0.489492	7.35422e-05	0.00593584	0.210011	0.978725	0.0648188
HbA1c-rs11759026	A	G	1	-0.089306	0.00440624	-0.000722245	-0.115481	-0.0561514	0.00762607	-0.627676	-1.34938	-0.312032	-0.221098	-0.0286266	0.0574836	0.025776	0.00268145	0.0428031	0.0428318	0.0143409	0.0812117	0.235179	0.0619165	0.0582219	0.0122159	0.120284	0.864268	0.787661	0.00697695	0.189868	0.594884	1.08912e-14	9.60895e-09	4.6712e-07	0.000146212	0.0191111
HbA1c-rs11786992	A	C	0.148348	0.0307537	-0.0130679	0.00163673	0.0510512	0.0385639	0.00137258	0.0507487	-0.92169	0.136494	0.0661422	0.0160238	0.0364931	0.0257026	0.0023053	0.036844	0.0368654	0.0122721	0.0717862	0.214723	0.052891	0.0497754	0.010464	0.399381	0.611153	0.477714	0.165869	0.295528	0.910946	0.479603	1.76771e-05	0.00986194	0.183911	0.125694
HbA1c-rs11880729	T	G	0.00325283	-0.018143	-0.0115207	0.00437128	0.0625793	0.0352564	0.0187379	-0.140135	-0.59698	0.0599891	0.165398	-0.0087428	0.0848585	0.0281132	0.00313413	0.0499679	0.0500024	0.0166651	0.0981579	0.298517	0.0721541	0.067644	0.0141866	0.830701	0.681955	0.163097	0.210429	0.480753	0.260852	0.153396	0.0455208	0.405747	0.0144814	0.537717
HbA1c-rs11948950	G	A	0.159538	-0.089972	0.0110939	0.00625335	0.00777951	-0.0148144	0.0107732	-0.178419	-0.131557	-0.0491653	-0.232463	-0.0132676	0.129552	0.0327083	0.00380182	0.0605883	0.060687	0.0203026	0.113258	0.338997	0.0863131	0.0817702	0.0172198	0.487379	0.734476	0.100007	0.897833	0.807144	0.595676	0.115182	0.697958	0.568939	0.00447138	0.441014
HbA1c-rs12035330	A	G	0.0213911	-0.0445212	-0.0298835	0.000562133	-0.076065	-0.0149986	0.00705794	-0.212167	0.268363	-0.202783	-0.155119	-0.00740168	0.0508068	0.0253742	0.00256634	0.0409327	0.0409403	0.0136691	0.0780949	0.235377	0.0589453	0.055216	0.0116271	0.380876	0.238912	0.826618	0.0631282	0.714102	0.605616	0.00659255	0.254228	0.000581455	0.00496527	0.524394
HbA1c-rs12146652	A	C	0.00411001	-0.0159679	-0.00677172	-0.00919034	-0.0613313	-0.0193496	0.00150025	0.324572	1.32767	-0.112928	-0.0961974	-0.0302702	0.0356059	0.025888	0.00229758	0.0366909	0.0367189	0.0122701	0.070451	0.211076	0.0529264	0.0495688	0.0105401	0.653819	0.793648	6.33579e-05	0.094611	0.598218	0.902686	4.08621e-06	3.17975e-10	0.032871	0.0522985	0.00408075
HbA1c-rs12210538	A	G	0.00283247	0.125393	-0.0147334	0.0045466	0.0261074	0.0973334	-0.0206516	0.265878	0.455776	0.0275627	0.0303808	0.00257588	0.0550183	0.0254918	0.00262981	0.0419824	0.0420032	0.0139865	0.0812307	0.239815	0.060486	0.0569162	0.0119294	0.0226607	0.563286	0.083833	0.534031	0.020489	0.1398	0.00106383	0.0573646	0.648615	0.593494	0.829045
HbA1c-rs12343797	G	A	0.602053	-0.121914	0.0234437	0.00572544	-0.0829881	0.0443894	-0.0219578	0.279691	0.620023	-0.0149862	0.0161164	0.0224728	0.0597786	0.0258686	0.00271046	0.0433568	0.0433826	0.0144394	0.0833061	0.24738	0.0624088	0.0586464	0.0123344	0.0414091	0.364798	0.0346574	0.0556122	0.30621	0.128341	0.000786936	0.0121988	0.810231	0.783466	0.0684637
HbA1c-rs12434326	G	C	0.0171212	-0.0420194	-0.008654	0.00485259	0.0705685	0.018562	-0.0189101	0.224017	-0.571453	0.0948822	0.0784876	-0.00706872	0.0524022	0.0254013	0.00258922	0.0412955	0.0413236	0.0137758	0.0811119	0.239336	0.0595699	0.0560696	0.0117925	0.422633	0.733336	0.0609109	0.0874768	0.653298	0.169844	0.0057483	0.0169568	0.11121	0.161568	0.548891
HbA1c-rs12487379	G	A	0.00782707	-0.0106059	0.0316019	0.000977195	-0.0326193	-0.0014635	0.0143214	-0.459044	-0.781111	-0.150417	-0.15066	-0.0307889	0.0361225	0.0257394	0.00229952	0.0367475	0.0367709	0.0122804	0.0708855	0.213571	0.0529908	0.0497889	0.0104667	0.769056	0.219537	0.670869	0.374725	0.968252	0.243534	9.44575e-11	0.000254866	0.00453253	0.00247878	0.00326579
HbA1c-rs12555274	G	C	0.0844318	-0.0312692	-0.024777	-0.00164704	-0.0104403	-0.0367017	0.028529	-0.21025	-1.09921	-0.174894	-0.128816	-0.00810987	0.0523327	0.0255206	0.00259264	0.0414076	0.0414174	0.0138153	0.0783329	0.233227	0.0596012	0.0560855	0.0117878	0.550169	0.331618	0.52525	0.800937	0.375542	0.038922	0.00727387	2.44148e-06	0.00334244	0.0216327	0.491462
HbA1c-rs12572897	G	A	0.243703	-0.308961	0.0212772	-0.00602948	-0.0580298	-0.0269834	0.0196462	-0.310474	0.641846	-0.212288	-0.06482	0.00407428	0.101986	0.0296312	0.00336396	0.0538738	0.0538813	0.0179591	0.102735	0.303966	0.0771307	0.0725334	0.0153359	0.00245039	0.472717	0.0730738	0.281417	0.616517	0.273981	0.0025107	0.0347244	0.00591815	0.371507	0.790494
HbA1c-rs12625671	T	C	0.0150861	0.287923	0.034389	-0.00573263	-0.0032372	0.157645	0.0432976	-0.156322	0.11044	-0.152156	-0.152014	0.0141556	0.122189	0.0312837	0.00363517	0.0579708	0.0579656	0.0193952	0.10924	0.340966	0.0832556	0.0786111	0.0166634	0.0184555	0.271654	0.114798	0.955468	0.00653582	0.02559	0.152432	0.74601	0.0676146	0.0531459	0.395604
HbA1c-rs12780892	C	G	0.00134208	-0.0199821	-0.0334743	-0.00222912	0.0192821	-0.035377	0.00436487	0.328261	-0.718132	0.112684	0.143515	0.0134094	0.0557971	0.0257795	0.00265994	0.0424597	0.0424944	0.0141932	0.0825265	0.246916	0.061218	0.0575813	0.0121465	0.720253	0.194122	0.402013	0.649738	0.405122	0.758438	6.96213e-05	0.00363308	0.0656672	0.0126895	0.269606
HbA1c-rs12888043	G	A	0.0174539	0.0695078	0.0312156	-0.00510874	0.0315536	0.03227	-0.0120514	0.131261	-0.992355	-0.200977	-0.112932	-0.00543412	0.0936094	0.0289836	0.0032609	0.0521207	0.0521373	0.0173693	0.0990191	0.301359	0.0744879	0.0705257	0.0146495	0.457767	0.281476	0.117194	0.544918	0.535955	0.487786	0.184969	0.000991622	0.00697414	0.109314	0.710682
HbA1c-rs12912777	C	T	0.272606	-0.16916	0.0128874	-0.00431496	-0.0854558	-0.144101	0.0130707	-0.220854	0.390627	-0.366102	-0.229788	-0.0425038	0.100818	0.0295776	0.00337042	0.0536679	0.0536634	0.0179187	0.100025	0.299509	0.0767525	0.0724797	0.0153745	0.0933708	0.663045	0.20046	0.111316	0.00724732	0.465729	0.0272452	0.192158	1.84489e-06	0.0015227	0.00570076
HbA1c-rs12948165	A	T	0.000703137	-0.00160628	-0.0285439	-0.000963076	0.0924951	-0.0571805	-0.00857519	0.195393	-0.0455011	-0.142069	-0.0198809	0.0296746	0.0602817	0.0259347	0.00272718	0.0435073	0.0435595	0.0145728	0.0829916	0.24614	0.0628691	0.0592625	0.0124466	0.978742	0.271069	0.723984	0.0335069	0.189286	0.556239	0.0185548	0.85334	0.0238371	0.73727	0.01712
HbA1c-rs12951632	T	C	0.00615308	-0.0564594	0.00782293	-0.00014389	-0.0284625	0.0400587	0.0179407	-0.409441	-1.15673	-0.199776	-0.0740402	-0.0292328	0.0459053	0.0251502	0.00246292	0.0394231	0.0394412	0.0131457	0.0746193	0.220644	0.0566395	0.0532902	0.0112093	0.218732	0.755765	0.953412	0.470311	0.309795	0.172331	4.09071e-08	1.58522e-07	0.000420191	0.16472	0.00911105
HbA1c-rs12978075	T	C	0.00236005	0.0335648	-0.00387176	0.00197891	-0.0144669	-0.00106747	0.00787344	-0.327487	0.428434	-0.0272626	0.03185	-0.00861757	0.0482656	0.0252735	0.00251922	0.0401686	0.0401844	0.013377	0.0778262	0.229389	0.0578485	0.0544667	0.0114766	0.486793	0.878245	0.432146	0.718732	0.978807	0.556145	2.57823e-05	0.0618028	0.637444	0.558709	0.452726
HbA1c-rs13092573	C	T	0.015325	0.0354452	-0.0128524	-0.0028624	-0.030656	-0.0923216	0.00875046	0.0237837	-0.12238	-0.130118	-0.0674241	-0.00140337	0.038233	0.0254333	0.00232914	0.0372532	0.0372923	0.0124327	0.0710831	0.213353	0.0535173	0.0504262	0.0105854	0.353884	0.613323	0.219093	0.41056	0.0133013	0.48154	0.737935	0.566238	0.0150452	0.181197	0.894529
HbA1c-rs13094957	T	C	0.0966819	-0.12638	-0.0388111	0.00678715	0.00585591	0.0143603	0.0241162	0.231791	-0.460888	0.318274	0.165545	0.00173856	0.0629895	0.0260977	0.00277077	0.0442248	0.0442495	0.0147689	0.0866741	0.259318	0.0636464	0.0599976	0.0126888	0.044819	0.136977	0.0143042	0.894658	0.745537	0.10249	0.0074893	0.0755191	5.71957e-07	0.00579519	0.891019
HbA1c-rs13266634	C	T	0.122809	0.0773485	-0.0192637	0.00454364	0.0280065	0.0699217	-0.0328849	-0.566749	-0.989756	0.222598	0.143912	0.0188181	0.0427634	0.0252524	0.00240431	0.0385144	0.0385653	0.0128557	0.0762311	0.225845	0.0557017	0.0523242	0.010963	0.0704904	0.445556	0.0587875	0.467123	0.0698218	0.0105283	1.05209e-13	1.17394e-05	6.43835e-05	0.00595307	0.0860721
HbA1c-rs1331309	T	G	0.999898	0.129212	-0.00686935	0.000722583	0.020512	0.0679195	0.00427357	-0.0476662	-0.981595	-0.171663	0.00355176	-0.0159417	0.0507243	0.025509	0.00257232	0.0410567	0.0410762	0.0137601	0.0794665	0.236239	0.0595094	0.0555736	0.0117743	0.0108556	0.787706	0.778782	0.617356	0.0982301	0.756123	0.548621	3.2528e-05	0.00391911	0.949041	0.175759
HbA1c-rs13403	A	C	0.000640201	-0.022661	-0.00939081	0.0016473	-0.0112382	-0.0233281	0.0217462	-0.0488424	-0.125676	-0.055181	-0.0257361	-0.0042272	0.0302823	0.0279897	0.00223042	0.035708	0.0357215	0.0119421	0.0691455	0.207231	0.0515369	0.0484856	0.0101365	0.454265	0.737241	0.460175	0.752971	0.513721	0.0686129	0.479958	0.544216	0.284303	0.595559	0.676659
HbA1c-rs1359790	G	A	0.0255971	-0.0193757	-0.00569265	0.00572749	0.115403	0.075049	-0.0151027	0.0746043	0.237958	0.315316	0.226099	-0.00945055	0.045354	0.0251506	0.00246071	0.0392524	0.0392775	0.0130948	0.0770947	0.228914	0.0566943	0.0531963	0.0111191	0.669227	0.820935	0.0199355	0.00328205	0.0560395	0.248776	0.333197	0.298569	2.67611e-08	2.13638e-05	0.395361
HbA1c-rs1402837	C	T	0.00642132	0.186484	-0.124604	0.00233121	0.025119	-0.0185939	-0.0121914	0.340774	0.14234	0.0207765	-0.0192845	-0.00736192	0.0561105	0.0258741	0.00263911	0.0422325	0.0422586	0.0141177	0.0818409	0.242115	0.060793	0.0572376	0.011951	0.000889026	1.4672e-06	0.377057	0.551993	0.659936	0.387832	3.13029e-05	0.556599	0.732534	0.736178	0.537891
HbA1c-rs144216645	C	T	0.00275187	0.0169919	-0.00647135	-0.00375235	-0.166368	-0.0475353	-0.0225243	-0.23833	-0.227669	-0.00192218	-0.0127033	0.0006754	0.0620857	0.0280775	0.00291826	0.046601	0.0466191	0.015546	0.0901824	0.264048	0.067069	0.0628008	0.0132602	0.784327	0.817717	0.198508	0.000356989	0.307894	0.147372	0.00822413	0.388564	0.977136	0.839699	0.959378
HbA1c-rs1464786	T	C	0.00732017	-0.0178869	-0.0153594	0.00220256	-0.0564188	-0.0553299	0.0216591	-0.199856	-0.286153	-0.0817012	-0.0510717	0.0305732	0.0526133	0.0254433	0.00259685	0.0413776	0.0414222	0.0138053	0.0799897	0.235042	0.0595149	0.0559619	0.011776	0.73388	0.546063	0.396345	0.172723	0.18163	0.116673	0.0124721	0.223433	0.169821	0.361446	0.00942647
HbA1c-rs149142833	C	T	0.00911242	-0.174435	-0.0136839	0.00155082	-0.00333936	-0.0239003	-0.0296292	0.495379	-0.213576	0.00217429	0.0655785	-0.00865169	0.0832941	0.0280666	0.00311375	0.0497335	0.049731	0.0165879	0.093642	0.293034	0.0713831	0.0675558	0.0141807	0.0362427	0.625867	0.618446	0.946466	0.630807	0.0740688	1.22336e-07	0.466097	0.975701	0.331684	0.541794
HbA1c-rs149530255	CTT	C	1	-0.0274176	0.0487591	-0.00470748	-0.0663342	-0.0439158	0.00378664	-0.16617	0.371359	-0.28746	-0.199487	-0.0264926	0.0296952	0.0291844	0.00225932	0.0361089	0.0361377	0.0120519	0.0700639	0.209438	0.0518639	0.0488631	0.0102944	0.355851	0.0947772	0.0371989	0.0662028	0.224277	0.753375	0.0177079	0.07621	2.98539e-08	4.45621e-05	0.0100692
HbA1c-rs149802978	C	G	0.212588	-0.317298	0.0365446	-0.0113007	-0.187832	-0.0330686	0.062131	-0.893198	-2.7802	-0.994518	-0.41174	-0.0350899	0.238397	0.0410715	0.00492644	0.0790556	0.0791123	0.0261223	0.140977	0.431138	0.113821	0.106592	0.0222553	0.183201	0.373584	0.0217981	0.0175047	0.675951	0.0173858	2.36592e-10	1.13163e-10	2.40443e-18	0.000112153	0.114868
HbA1c-rs1550026	A	T	0.00331625	-0.0351702	-0.0044177	-0.00608022	-0.0585028	-0.0503261	4.34798e-05	-0.159314	-0.0494994	-0.0704594	-0.0700327	-0.00921242	0.0340598	0.026531	0.00229068	0.0365615	0.036572	0.0121886	0.0705949	0.208387	0.052713	0.049635	0.0103998	0.301792	0.867755	0.0079472	0.109574	0.168797	0.997154	0.0240255	0.812241	0.181335	0.15826	0.375711
HbA1c-rs1708302	T	C	0.379427	-0.0194081	0.00848858	-0.00451175	-0.0466997	-0.0544551	0.0218158	0.158659	1.42811	-0.231309	-0.172334	0.000628774	0.0290792	0.0290255	0.00222334	0.0356163	0.0356395	0.0118842	0.0685689	0.201517	0.0513003	0.048192	0.0101617	0.504504	0.769941	0.0424326	0.189795	0.126528	0.0664027	0.0206758	1.37633e-12	6.52078e-06	0.000349018	0.950661
HbA1c-rs17168486	C	T	0.0374741	-0.121204	0.00876288	0.00115626	-0.0245263	-0.0769974	-0.00156451	-0.128877	-1.12702	-0.255343	-0.174327	-0.0321177	0.0738641	0.0269411	0.00294043	0.0469338	0.0469742	0.0156265	0.0887548	0.263574	0.0671785	0.0644672	0.0130457	0.100818	0.744984	0.694152	0.601272	0.101185	0.92025	0.146487	1.90435e-05	0.000144188	0.00684929	0.01382
HbA1c-rs174557	A	G	0.000433496	0.03474	-0.000808701	-0.000734229	0.038276	-0.0125195	-0.00795917	-0.259948	-0.149738	-0.0425299	0.106358	0.00441103	0.0427923	0.0251692	0.00240895	0.0385565	0.0385838	0.0128363	0.075097	0.22446	0.0557366	0.0521679	0.0110647	0.416891	0.974368	0.760525	0.320845	0.745579	0.535223	0.000537268	0.504709	0.445434	0.041476	0.690147
HbA1c-rs17476364	T	C	0.0103297	0.909563	-0.0351313	-0.00754946	0.293767	-0.0288062	0.0112415	0.169322	1.02137	0.108289	0.139161	0.0182426	0.117467	0.0332299	0.00357591	0.0571986	0.0572285	0.0191053	0.111618	0.32981	0.0834943	0.0778911	0.0162191	9.73487e-15	0.290412	0.0347564	2.80998e-07	0.614716	0.556265	0.129272	0.00195618	0.194646	0.0740033	0.260695
HbA1c-rs17496249	A	G	0.0399008	0.0254175	0.000361151	0.000507594	0.050082	0.0375601	-0.00335446	0.364214	0.998137	0.0454125	0.138462	0.00729242	0.031752	0.0273601	0.00225929	0.036048	0.0360586	0.0120477	0.069881	0.209409	0.0519679	0.0487546	0.0103102	0.423421	0.989468	0.822237	0.164739	0.29758	0.780681	1.87059e-07	1.87609e-06	0.382197	0.00451222	0.479382
HbA1c-rs17727064	A	G	0.0104826	-0.0334735	-0.0443618	0.0014462	-0.0884523	-0.0108954	-0.00434616	0.22439	-1.10294	0.181861	0.0414198	-0.0101122	0.0337308	0.026426	0.00227454	0.0363178	0.0363305	0.0121097	0.0698956	0.20633	0.0522391	0.0492393	0.010303	0.321017	0.0932087	0.524895	0.0148717	0.764256	0.719671	0.00132589	9.02427e-08	0.000499079	0.400241	0.326358
HbA1c-rs1866475	G	A	0.00516029	0.0385732	0.0378717	0.00207985	-0.0423912	-0.0629502	-0.0108667	-0.266327	-1.04152	-0.280951	-0.159901	-0.0105857	0.0489147	0.025232	0.00252464	0.0403159	0.0403484	0.0134524	0.0777579	0.232078	0.0580731	0.0547881	0.0115891	0.430358	0.133373	0.410042	0.293041	0.118722	0.419212	0.000614724	7.20011e-06	1.31349e-06	0.00351727	0.361026
HbA1c-rs1884634	G	T	0.0978524	0.0207216	0.0181894	-0.0029549	-0.0621319	-0.0696616	0.011541	-0.526969	-1.52164	-0.313839	-0.23394	-0.0164438	0.0624151	0.0261887	0.00277779	0.0442352	0.0442682	0.0147661	0.0841283	0.24748	0.0636313	0.0598615	0.0126791	0.739893	0.487336	0.287438	0.160147	0.115575	0.434457	3.76166e-10	7.83183e-10	8.14177e-07	9.30976e-05	0.194658
HbA1c-rs1894474	A	G	0.00175026	0.0195852	-0.0253685	0.000528564	0.0210615	0.0053029	-0.00489354	-0.160195	0.0718722	0.0323811	0.0319139	0.0117621	0.0300796	0.0284673	0.00224517	0.0359042	0.0359159	0.0119865	0.0690819	0.205976	0.0518337	0.0486004	0.0102704	0.514975	0.372852	0.81388	0.557471	0.882621	0.683088	0.0204002	0.727139	0.532161	0.5114	0.252111
HbA1c-rs1967604	G	A	0.000544478	0.00318285	0.0228424	0.00243864	-0.0322532	0.0324572	0.0249216	0.124991	0.766754	0.0914528	0.0144904	0.0246435	0.0461744	0.0252403	0.00247463	0.0396212	0.0396431	0.0132006	0.0766432	0.230641	0.0570541	0.0537688	0.011317	0.945044	0.365468	0.324401	0.415623	0.412938	0.0590379	0.102931	0.00088605	0.108956	0.78755	0.0294393
HbA1c-rs198851	G	T	0.00228607	0.104105	-0.019674	0.000238906	0.117613	0.0124075	0.049323	-0.22597	-1.40978	-0.0328628	0.0333308	0.0137572	0.0845135	0.0280962	0.0031166	0.0497929	0.049804	0.0166105	0.0953337	0.285729	0.0717571	0.0666	0.0143664	0.218019	0.483779	0.938897	0.0181754	0.803263	0.00298427	0.017774	8.06275e-07	0.646972	0.61675	0.33827
HbA1c-rs2005078	A	G	0.00102816	0.0962542	0.0359387	-0.000657569	0.00240399	-0.0373097	-0.0277083	0.0517573	0.0486209	-0.0248224	0.018495	0.0201234	0.0399108	0.0253624	0.00236731	0.0378163	0.0378309	0.0125785	0.0742633	0.220117	0.0547268	0.0513795	0.0107863	0.0158776	0.156482	0.781189	0.949312	0.324025	0.027608	0.485839	0.825181	0.650139	0.718872	0.062094
HbA1c-rs2015803	C	T	0.00354935	0.124036	-0.0493508	-0.00110417	0.0706183	-0.0500325	0.00249137	-0.131911	-1.31141	-0.0746097	-0.108372	-0.0181883	0.0525549	0.0255807	0.00259154	0.0413929	0.0414046	0.0138363	0.0794029	0.241299	0.0594766	0.0561167	0.0117452	0.0182695	0.0537048	0.670059	0.0880002	0.226902	0.857105	0.0966571	5.49147e-08	0.209685	0.0534603	0.121487
HbA1c-rs2076363	C	G	0.0057963	0.00926757	0.00451907	0.00384054	-0.0516609	-0.0143995	0.00581399	-0.0209033	-0.845772	-0.00463815	0.00526515	-0.0192758	0.0399838	0.0253719	0.00236937	0.0378847	0.037891	0.0126309	0.0730509	0.218232	0.0544473	0.0512374	0.0107987	0.816707	0.858634	0.105038	0.172684	0.703928	0.645302	0.774766	0.000106402	0.932114	0.918154	0.0742611
HbA1c-rs223473	C	T	0.00704816	0.017028	-0.0501449	-0.000475724	0.0205701	0.0332909	-0.0385373	0.438084	1.29118	0.215608	0.154806	0.00271069	0.0295112	0.0286438	0.00223123	0.0356779	0.0357031	0.0119122	0.0688481	0.208804	0.0513073	0.0483475	0.0102316	0.563939	0.0800098	0.831162	0.564244	0.351111	0.00121609	1.98134e-10	6.27183e-10	2.64387e-05	0.0013653	0.791061
HbA1c-rs2237895	A	C	0.54302	-0.0384056	0.0214117	-0.00600798	-0.111825	-0.117124	0.0151333	0.151367	-0.106409	-0.315317	-0.188427	-0.00178445	0.0332348	0.0264796	0.0022579	0.0360667	0.0361008	0.0120509	0.0697242	0.208037	0.0519221	0.0487218	0.0103094	0.247852	0.41874	0.00779435	0.00193211	0.00117729	0.209198	0.0299371	0.609008	1.2593e-09	0.000110045	0.862581
HbA1c-rs2248293	T	C	0.0133833	-0.00186575	0.0411861	-0.00143347	-0.0627325	-0.0267183	-0.00574877	-0.203002	-0.76001	-0.202612	-0.0951719	0.00339396	0.0383269	0.0254652	0.00233735	0.0373699	0.0373837	0.0124701	0.0714824	0.216338	0.0536468	0.0505534	0.0106601	0.961174	0.105805	0.539686	0.0932136	0.474792	0.644796	0.00451325	0.000443038	0.000158931	0.0597564	0.750197
HbA1c-rs2256974	C	A	0.378859	0.0743883	-0.0226153	0.00265891	0.0253788	-0.0228587	-0.0231454	-0.439406	-0.440091	-0.0881239	-0.0103449	-0.00383603	0.0731576	0.0270138	0.00293522	0.0469946	0.0470026	0.0156662	0.0908312	0.25932	0.0675208	0.0637605	0.0134667	0.309239	0.402496	0.365009	0.589172	0.626734	0.139567	1.31492e-06	0.0896792	0.191848	0.871112	0.775757
HbA1c-rs2305196	G	A	0.012377	0.0805306	-0.0398983	-0.000770001	-0.0185983	0.0448011	-0.026561	0.147856	1.12106	0.0652719	0.0837231	-0.00236796	0.049524	0.0253182	0.00253815	0.0405537	0.0405826	0.0135367	0.0783911	0.235527	0.0584842	0.0549833	0.0115912	0.103931	0.115056	0.761607	0.646515	0.269616	0.0497464	0.059278	1.939e-06	0.264398	0.127836	0.838128
HbA1c-rs2375279	C	T	0.002584	0.110681	0.0274418	0.00381854	-0.0742401	0.0628026	-0.00721989	0.268883	0.896011	0.00446045	-0.0124968	0.00764637	0.0849144	0.0279651	0.00311876	0.0497472	0.0497917	0.0165936	0.0955717	0.279327	0.0714035	0.0676153	0.0142172	0.192425	0.326452	0.22081	0.13561	0.2072	0.663489	0.00490213	0.00133792	0.95019	0.853369	0.590698
HbA1c-rs2408955	T	G	0.0751545	-0.193419	0.161684	0.00167363	0.128478	-0.0283127	0.0021392	-0.203289	0.741066	0.0964924	0.0536083	0.0248736	0.0300533	0.028798	0.0022365	0.0357013	0.0357312	0.0118984	0.0685913	0.204043	0.0514079	0.0483055	0.0101691	1.23012e-10	1.97441e-08	0.454265	0.000319884	0.428139	0.857319	0.00303927	0.000281394	0.0605209	0.267097	0.0144461
HbA1c-rs247826	C	T	0.0163993	0.0793575	0.0203257	-0.00119079	-0.07539	0.041583	0.00763619	-0.0751072	-1.06975	0.136112	0.0366989	-0.0120723	0.0583749	0.0258468	0.0026995	0.0430662	0.0430981	0.0144044	0.0840914	0.253827	0.0621594	0.0583604	0.0122739	0.174007	0.43164	0.659131	0.0800226	0.334624	0.596022	0.371772	2.50424e-05	0.028546	0.529459	0.325325
HbA1c-rs2510078	C	T	0.0250885	-0.000276479	0.0364901	-0.00113371	0.000632312	-0.0526512	0.0180202	-0.120466	0.612138	-0.211041	-0.0702175	-0.00953954	0.0472317	0.0252119	0.00249368	0.0398571	0.0398697	0.013298	0.0763429	0.229651	0.0573616	0.0540945	0.0113586	0.995329	0.147804	0.649373	0.987343	0.186642	0.175384	0.114576	0.00768742	0.000234109	0.194271	0.400992
HbA1c-rs2583920	A	G	0.0154414	0.173709	0.04925	-0.00494914	-0.12314	0.00303969	-0.0148158	-0.261633	-1.35323	-0.276739	-0.267929	-0.0428039	0.133174	0.0328782	0.00383702	0.0611072	0.0611605	0.0204063	0.1144	0.342302	0.0876245	0.0827944	0.0172379	0.192106	0.134147	0.197108	0.0438896	0.960361	0.467814	0.0221962	7.70942e-05	0.00158761	0.00121211	0.0130247
HbA1c-rs2737252	G	A	0.776487	0.00914653	-0.0192221	0.00185046	-0.0183723	-0.0142654	-9.44745e-05	0.378309	1.25572	0.0723408	0.0760965	-0.00133723	0.0462377	0.025189	0.00248007	0.0395532	0.0395744	0.0132112	0.0768235	0.223195	0.0573708	0.0538347	0.011263	0.84319	0.445397	0.455587	0.642294	0.718496	0.994294	8.46781e-07	1.84502e-08	0.207335	0.157505	0.905491
HbA1c-rs2796441	G	A	0.149417	-0.00215712	-0.0262909	0.00441442	0.0879984	0.0417595	-0.0214994	0.233562	0.0469821	0.276012	0.211598	-0.00541507	0.0328859	0.0265847	0.00226062	0.0360292	0.0360497	0.0120366	0.0695971	0.20681	0.0519244	0.048717	0.0103319	0.947701	0.322689	0.0508503	0.0145898	0.246708	0.0740731	0.000791168	0.820288	1.06425e-07	1.40375e-05	0.6002
HbA1c-rs28473282	G	A	0.0164816	-0.0466197	0.00230373	0.00638032	0.0452193	-0.0257112	0.00705571	-0.340076	-1.86445	0.149543	0.151932	0.0105657	0.0318875	0.0272669	0.00225564	0.0359937	0.0360188	0.0120171	0.0694183	0.203113	0.0519759	0.0488494	0.0102106	0.143741	0.932668	0.0046755	0.209005	0.475335	0.557109	9.64181e-07	4.36892e-20	0.00401322	0.00186991	0.300775
HbA1c-rs28505901	G	A	0.0241624	0.0768561	-0.0085746	0.00960334	-0.0328895	0.0458682	-0.0414944	-0.332435	0.368616	0.108146	0.201015	0.00336366	0.0530541	0.0254479	0.00259907	0.0414795	0.0415169	0.0138146	0.0825284	0.23918	0.059949	0.0562544	0.0118415	0.14744	0.736157	0.000220015	0.427831	0.269244	0.00266777	5.62408e-05	0.123279	0.071239	0.000352583	0.776368
HbA1c-rs28601761	C	G	0.00676521	0.00473194	0.011024	-0.000918593	-0.0820952	0.0191682	0.00368971	-0.18058	-0.807435	-0.31493	0.00450227	-0.0108009	0.0339392	0.0271474	0.00231557	0.0369594	0.0369672	0.0123328	0.0714749	0.216072	0.0534307	0.0500299	0.0105217	0.889115	0.684684	0.691587	0.0263366	0.604096	0.764804	0.011522	0.000186364	3.77355e-09	0.928294	0.304643
HbA1c-rs2908292	C	T	0.00811326	0.358782	-0.253947	0.00157684	-0.0570886	0.0115316	0.0139913	0.4206	0.499821	-0.0657938	-0.00209824	-0.0118839	0.0585894	0.0261755	0.00269231	0.042901	0.0429099	0.0143306	0.0824781	0.245389	0.0616822	0.0580752	0.0121463	9.15826e-10	2.99297e-22	0.558089	0.183287	0.78813	0.328905	3.40741e-07	0.0416661	0.286127	0.971179	0.327881
HbA1c-rs2925979	C	T	0.0053108	-0.056364	0.00381006	-0.00325453	-0.0124822	-0.0553191	0.0413236	-0.187949	-0.528768	-0.122733	-0.0632822	-0.00340192	0.0438271	0.0251362	0.00242794	0.0388361	0.0388547	0.012964	0.0744556	0.223047	0.0556485	0.0523795	0.0110629	0.198426	0.879521	0.180101	0.747902	0.154521	0.0014349	0.011593	0.0177572	0.0274197	0.226992	0.758457
[truncated: 1,742 more rows]
