# Supplementary material for: Genetic determinants of polygenic prediction accuracy within a population
Source: Research Square preprint supplement (doi:10.21203/rs.3.rs-1157621/v1), 2022-01-13
Supplement: Supplementary file 5 [file c9debf0f162a96ead989c29f.xlsx]

## Sheet: pvQTL_summary.sig.effectnum
Trait	Chr	SNP	Position	Effect allele	Frequency	beta	SE	p-value	N	Frequency in reference panel	Beta - Joint analysis	SE - Joint analysis	p-value - Joint analysis	LD r
BMI	12	rs7132908	50263148	A	0.38437	0.0179845	0.00288682	4.67e-10	253511	0.382798	0.0179845	0.00288704	4.68e-10	0
BMI	16	rs12716979	31011821	G	0.373802	-0.0212942	0.0029326	3.84e-13	248325	0.367246	-0.0213482	0.00293292	3.37e-13	0
BMI	16	rs1421085	53800954	C	0.403102	0.0415939	0.00286186	7.39e-48	253512	0.406799	0.0415939	0.00286305	8.07e-48	0
BMI	18	rs145951492	57784116	GAT	0.204194	0.031771	0.00365725	3.72e-18	229969	0.210947	0.031771	0.00365784	3.76e-18	0
BMI	19	rs1800437	46181392	C	0.192962	-0.0233287	0.0035585	5.54e-11	253512	0.193822	-0.0233287	0.00355879	5.56e-11	0
BMI	1	rs506589	177894287	C	0.207075	0.0267916	0.003468	1.12e-14	253135	0.203305	0.0267916	0.0034684	1.12e-14	0
BMI	1	rs2605098	219643649	A	0.338634	0.017616	0.00296741	2.91e-09	253503	0.339794	0.017616	0.00296761	2.92e-09	0
BMI	2	rs13401686	650519	G	0.172526	-0.025411	0.00371785	8.21e-12	253337	0.171463	-0.025411	0.00371819	8.24e-12	0
BMI	3	rs779470261	131646163	C	0.260844	0.020862	0.00324719	1.32e-10	245905	0.256172	0.020862	0.00324746	1.33e-10	0
BMI	6	rs13195401	26463574	T	0.109443	0.0339642	0.00449832	4.34e-14	253468	0.109269	0.0339642	0.00449882	4.37e-14	0
BMI	6	rs72891717	50858235	A	0.168582	0.0288863	0.00375648	1.47e-14	252742	0.168946	0.0288863	0.00375691	1.48e-14	0
BMI	8	rs34891368	10956707	T	0.386915	0.019641	0.00297977	4.36e-11	237351	0.389338	0.019641	0.00298004	4.37e-11	0
Calcium	6	rs7739995	10869648	A	0.455684	-0.0186212	0.00301812	6.84e-10	221263	0.446713	-0.0186212	0.00301837	6.86e-10	0
FEV1 / FVC ratio	15	rs56077333	78899003	A	0.323423	0.0245742	0.00346965	1.41e-12	189757	0.32582	0.0245742	0.0034701	1.42e-12	0
FEV1 / FVC ratio	4	rs6833979	145463521	A	0.386525	-0.0237495	0.00335297	1.41e-12	187509	0.392713	-0.0237495	0.00335341	1.42e-12	0
Glucose	10	rs11187019	94248310	A	0.449027	0.0201868	0.00303282	2.81e-11	219679	0.446615	0.0201868	0.00303312	2.82e-11	0
Glucose	10	rs11196180	114748029	T	0.372343	0.0197056	0.00315299	4.11e-10	215170	0.370678	-0.170118	0.00749437	4.54e-114	0.495682
Glucose	10	rs34872471	114754071	C	0.290703	0.0495234	0.00331392	1.7e-50	220582	0.291882	0.272051	0.00869897	1.06e-214	-0.257004
Glucose	10	rs78025551	114757956	G	0.142454	0.0309136	0.004314	7.73e-13	219876	0.142726	0.393088	0.0110841	1.76e-275	0.428725
Glucose	10	rs7904519	114773927	G	0.465539	0.0220309	0.00301688	2.82e-13	220739	0.468836	-0.196128	0.00763386	1.44e-145	0.524394
Glucose	10	rs56299331	114788436	T	0.20132	0.0455845	0.00374906	5.14e-34	221094	0.199468	0.133312	0.00752083	2.66e-70	0
Glucose	11	rs61894887	55032582	C	0.0620892	0.0413848	0.00622173	2.9e-11	221761	0.0629164	0.0413848	0.00622234	2.91e-11	0
Glucose	5	rs116782923	102331465	T	0.0534285	0.059081	0.00667999	9.2e-19	221483	0.0512665	0.059081	0.00668115	9.32e-19	0
Glucose	6	rs7766070	20686573	A	0.263713	0.0255943	0.00340785	5.89e-14	221678	0.264612	0.0255943	0.00340828	5.94e-14	0
Glucose	6	rs9273363	32626272	A	0.303521	0.0484966	0.00326422	6.26e-50	221761	0.304437	0.0444139	0.003336	1.93e-40	0.210033
Glucose	6	rs555058781	32684659	G	0.0834621	0.049754	0.005588	5.4e-19	209245	0.0806789	0.0342468	0.00570913	1.99e-09	0
Glucose	7	7:15052179_AAGGGGACAAAGCC_A	15052179	A	0.489447	0.0226816	0.00322164	1.92e-12	192735	0.499044	0.0226816	0.00322205	1.93e-12	0
HbA1c	10	rs7896600	12255175	C	0.239346	0.0199165	0.00336561	3.27e-09	242420	0.236448	0.0199165	0.00336585	3.27e-09	0
HbA1c	10	rs34204798	80951130	CG	0.459006	-0.0172177	0.00290004	2.9e-09	239381	0.459271	-0.0172177	0.00290025	2.91e-09	0
HbA1c	10	rs7923837	94481917	A	0.381007	-0.0190666	0.00295703	1.13e-10	242419	0.382268	-0.0190666	0.00295728	1.14e-10	0
HbA1c	10	rs11196180	114748029	T	0.372343	0.0234578	0.00301546	7.3e-15	235227	0.370678	-0.138028	0.00714386	3.57e-83	0.495682
HbA1c	10	rs34872471	114754071	C	0.290703	0.0517446	0.00316944	6.44e-60	241129	0.291882	0.249317	0.0083128	1.25e-197	-0.257004
HbA1c	10	rs78025551	114757956	G	0.142454	0.0258366	0.00412632	3.82e-10	240349	0.142726	0.339614	0.0106071	6.2e-225	0.428725
HbA1c	10	rs7904519	114773927	G	0.465539	0.0244688	0.00288525	2.24e-17	241326	0.468836	-0.176094	0.0073025	1.78e-128	0.523698
HbA1c	10	rs72826094	114801488	T	0.201554	0.0460473	0.00358682	1.01e-37	241334	0.199498	0.107869	0.007156	2.41e-51	0
HbA1c	16	rs1421085	53800954	C	0.403102	0.0187557	0.00292758	1.49e-10	242419	0.406799	0.0186117	0.00292788	2.06e-10	0.00582009
HbA1c	22	rs112121515	26687152	T	0.0556194	0.0400823	0.00630366	2.04e-10	239519	0.0533201	0.0400823	0.00630418	2.04e-10	0
HbA1c	22	rs4499538	49379608	A	0.0804674	0.0371595	0.00553956	1.97e-11	220164	0.0809326	0.0371595	0.00554011	1.98e-11	0
HbA1c	2	rs13405357	227022036	C	0.336986	-0.0179792	0.00304835	3.68e-09	240794	0.344389	-0.107685	0.00556065	1.51e-83	0.839141
HbA1c	3	rs9859406	185534482	A	0.312553	0.0224239	0.00311023	5.61e-13	240508	0.30956	0.0224239	0.00311056	5.64e-13	0
HbA1c	4	rs1046316	6304087	A	0.322076	-0.0193625	0.00307961	3.23e-10	241418	0.322586	-0.0193625	0.00307986	3.24e-10	0
HbA1c	5	rs140176198	102383967	C	0.0526131	0.0428605	0.00644069	2.84e-11	241772	0.0507587	0.0428605	0.00644127	2.85e-11	0
HbA1c	6	rs147228463	14003956	C	0.0555962	0.0397197	0.0064077	5.69e-10	231896	0.0567876	0.039689	0.00640822	5.89e-10	0.000720264
HbA1c	6	rs9368222	20686996	A	0.261906	0.0222101	0.00326613	1.05e-11	242418	0.262114	0.0221958	0.00326644	1.08e-11	0
HbA1c	6	rs2857597	31585000	T	0.280423	-0.0256716	0.00319668	9.69e-16	242419	0.279755	-0.0732711	0.0049919	8.92e-49	0.623903
HbA1c	6	rs506770	31785228	G	0.238397	0.0239999	0.0033701	1.07e-12	242419	0.238795	0.243146	0.00780325	3.76e-213	0.841976
HbA1c	6	rs9267654	31841009	A	0.189133	-0.0226512	0.00367372	7.02e-10	241532	0.193085	-0.209446	0.00752555	1.81e-170	-0.214443
HbA1c	6	rs9267922	32206465	A	0.219341	0.0230225	0.00359856	1.58e-10	225452	0.221878	0.0610026	0.00474384	7.63e-38	-0.299047
HbA1c	6	rs2273017	32337630	G	0.408478	-0.0236137	0.00292129	6.3e-16	242419	0.415506	0.0340921	0.00396798	8.56e-18	-0.190276
HbA1c	6	rs143895893	32348421	ATAAT	0.296344	0.0196588	0.00317484	5.94e-10	237849	0.297383	0.0393031	0.00402487	1.59e-22	-0.304797
HbA1c	6	rs6457594	32443961	A	0.269621	-0.0237518	0.00337641	2e-12	222671	0.275193	0.0320834	0.00415171	1.09e-14	-0.331863
HbA1c	6	rs9273367	32626438	T	0.304615	0.0569851	0.00312574	2.93e-74	241264	0.305539	0.0501106	0.00433219	6.05e-31	-0.0123651
HbA1c	6	rs62397687	32802009	T	0.18498	0.036003	0.00370649	2.64e-22	241314	0.186322	0.0680167	0.00523149	1.2e-38	0.433848
HbA1c	6	rs3819720	32804570	A	0.359248	0.0226618	0.00299302	3.69e-14	242418	0.358116	-0.0438563	0.00436896	1.04e-23	0.587335
HbA1c	6	rs2071465	32805470	G	0.425309	0.0223857	0.00290456	1.29e-14	242418	0.423834	-0.0392387	0.00421939	1.41e-20	0.501119
HbA1c	6	rs11459466	32853221	GT	0.230169	0.02104	0.0034612	1.21e-09	235509	0.228234	0.0997721	0.00566282	1.77e-69	0.511347
HbA1c	6	rs3749981	32862682	T	0.0794336	0.0368981	0.00531043	3.7e-12	242419	0.0796487	0.451537	0.0145408	1.03e-211	0.903813
HbA1c	6	rs374138058	32874047	GT	0.16762	0.0250802	0.00385861	8.04e-11	240650	0.164454	0.0461311	0.00559355	1.62e-16	0
HbA1c	7	rs1029534	28189083	T	0.300477	0.0185506	0.00313245	3.18e-09	242397	0.303377	0.0185506	0.00313267	3.19e-09	0
HbA1c	9	rs10811660	22134068	A	0.173115	0.0232152	0.00379574	9.59e-10	242400	0.169746	0.0247602	0.00380332	7.51e-11	-0.0618942
HbA1c	9	rs7018475	22137685	G	0.256231	0.0203063	0.00328953	6.7e-10	242419	0.253786	0.0216344	0.0032961	5.25e-11	0
Heel BMD	7	rs2536196	120959154	T	0.391136	0.0435255	0.00388671	4.14e-29	138857	0.388985	0.0435255	0.00388845	4.39e-29	0
LDL	11	11:61614426_CT_C	61614426	C	0.356019	-0.0219825	0.00304602	5.32e-13	234998	0.356819	-0.0219825	0.00304635	5.35e-13	0
LDL	11	rs7350481	116586283	T	0.0583299	0.0492453	0.00614291	1.09e-15	241167	0.0575725	0.268045	0.0115436	2.85e-119	-0.0540463
LDL	11	rs964184	116648917	G	0.132324	0.0473619	0.00424035	5.76e-29	242074	0.128256	0.370023	0.0129135	1.43e-180	0.677875
LDL	11	rs6589566	116652423	G	0.0649708	-0.0484214	0.00583013	9.95e-17	242074	0.0659449	-0.988737	0.0183871	0	0.896276
LDL	11	rs662799	116663707	G	0.0587005	0.0535252	0.00611305	2.02e-18	242074	0.0616293	0.415775	0.0141273	2.23e-190	0
LDL	16	rs56228609	56987765	T	0.315992	-0.0200381	0.00309753	9.86e-11	241062	0.310161	-0.0200381	0.00309779	9.9e-11	0
LDL	16	rs2000999	72108093	A	0.188296	0.0232242	0.00367584	2.65e-10	242074	0.185948	0.0232242	0.00367614	2.66e-10	0
LDL	19	rs6511720	11202306	T	0.118799	-0.09794	0.00443744	5.97e-108	242073	0.115233	-0.103021	0.00447589	3.16e-117	-0.123009
LDL	19	rs10422256	11216617	G	0.477205	-0.0205971	0.00288304	9.05e-13	241069	0.475984	-0.0287044	0.00290534	5.09e-23	0.00347046
LDL	19	rs756350040	19370340	T	0.0722402	-0.0578439	0.00556903	2.85e-25	240438	0.0707432	-0.0566589	0.00557049	2.66e-24	0
LDL	19	rs11881756	45220896	C	0.114405	-0.0291728	0.00451475	1.04e-10	242075	0.116596	-0.0776713	0.00635361	2.29e-34	0.689518
LDL	19	rs62117161	45233385	G	0.0868417	0.0391005	0.00511068	2e-14	241343	0.0880164	0.376484	0.0118846	3.08e-220	0.438851
LDL	19	rs2927439	45242740	G	0.32848	-0.0192707	0.00307159	3.52e-10	240218	0.331501	-0.204564	0.00848285	1.74e-128	0.868728
LDL	19	rs4803748	45247048	T	0.379402	-0.0205042	0.00299421	7.49e-12	236816	0.382845	0.170854	0.00838132	2.27e-92	0.474507
LDL	19	rs10401176	45253491	T	0.12345	-0.0308611	0.00439363	2.16e-12	239314	0.124504	-0.278634	0.00986242	1.34e-175	0.0950434
LDL	19	rs395908	45373565	A	0.168598	-0.0304316	0.00384155	2.34e-15	241648	0.169297	-0.189319	0.00693748	5.67e-164	0.595221
LDL	19	rs393584	45377334	A	0.355311	-0.0182236	0.00301257	1.46e-09	240476	0.354532	0.0704417	0.00497165	1.43e-45	-0.178138
LDL	19	rs6859	45382034	A	0.422457	0.0264432	0.00290907	9.91e-20	242074	0.42603	0.0408645	0.00384235	2.04e-26	0.329121
LDL	19	rs6857	45392254	T	0.171465	0.0651833	0.00381415	1.77e-65	241638	0.172529	0.256188	0.0113092	1.3e-113	-0.380367
LDL	19	rs157580	45395266	G	0.394888	-0.0272639	0.00293954	1.78e-20	242074	0.395518	-0.340144	0.00789683	0	-0.421118
LDL	19	rs59007384	45396665	T	0.205605	0.03873	0.00356585	1.76e-27	240637	0.203943	-0.539264	0.010319	0	-0.129061
LDL	19	rs11668327	45398633	C	0.170866	-0.0390355	0.00386877	6.12e-24	235699	0.171504	-0.101454	0.00528632	4.33e-82	0.200351
LDL	19	rs405509	45408836	T	0.488989	0.0201104	0.00287477	2.64e-12	242074	0.492959	0.259816	0.00761636	4.76e-255	0.267623
LDL	19	rs429358	45411941	C	0.155781	0.0742388	0.00396015	2.07e-78	242074	0.157329	0.204225	0.00978393	9.32e-97	-0.111021
LDL	19	rs1065853	45413233	T	0.0797279	0.12039	0.00530288	4.21e-114	241823	0.0793868	0.78957	0.0106875	-0.226985
LDL	19	rs439401	45414451	T	0.361359	-0.0207111	0.00299138	4.4e-12	242073	0.365309	0.187927	0.00741207	8.08e-142	-0.344126
LDL	19	rs12721046	45421254	A	0.15708	0.0530281	0.00396226	7.57e-41	240356	0.162572	-0.104957	0.00743841	3.29e-45	-0.355702
LDL	19	rs157595	45425460	A	0.377878	-0.0313098	0.00307827	2.67e-24	224353	0.383331	-0.0856939	0.00662283	2.71e-38	-0.18584
LDL	19	rs60049679	45429708	C	0.0577337	0.0405975	0.00637361	1.89e-10	226214	0.0569796	0.116763	0.00718584	2.27e-59	0.0586403
LDL	19	rs114448690	45431453	A	0.0882243	-0.0307787	0.00509593	1.54e-09	239322	0.0875996	-0.107745	0.00620629	1.64e-67	-0.227695
LDL	19	rs7246100	45436247	C	0.384131	0.0259336	0.00355872	3.16e-13	166832	0.374669	0.0412462	0.00417409	5.01e-23	-0.00316198
LDL	19	rs12979278	49218602	C	0.451861	-0.0194806	0.00290558	2.02e-11	239072	0.454029	-0.0188807	0.00290996	8.68e-11	0
LDL	1	rs200159426	55491780	G	0.267189	-0.023563	0.00331358	1.15e-12	232526	0.264441	-0.0224214	0.00331867	1.42e-11	0.0543625
LDL	1	rs693668	55521109	G	0.34991	-0.0217943	0.00301693	5.05e-13	241445	0.339001	-0.0206272	0.00302156	8.69e-12	0.00268593
LDL	1	rs4344355	63153953	T	0.347104	-0.0298634	0.00306129	1.75e-22	235333	0.34628	-0.0298509	0.00306192	1.86e-22	0
LDL	1	rs12740374	109817590	T	0.222165	-0.0586717	0.00345519	1.14e-64	242074	0.220548	-0.0586717	0.00345724	1.35e-64	0
LDL	20	rs2618566	17844684	G	0.338902	0.0189257	0.00303604	4.56e-10	242074	0.340097	0.0189257	0.00303628	4.57e-10	0
LDL	2	2:21266774_GGCAGCGCCA_G	21266774	G	0.337921	0.0410778	0.0030504	2.47e-41	239997	0.340996	0.0327882	0.00314495	1.89e-25	-0.242863
LDL	2	rs563290	21288226	G	0.178843	-0.0524267	0.00374898	1.94e-44	242045	0.177949	-0.0423532	0.00386565	6.2e-28	-0.014088
LDL	2	rs4665972	27598097	T	0.392945	0.0190381	0.00297213	1.5e-10	237247	0.398378	0.0186434	0.00297272	3.58e-10	0
LDL	2	rs3792023	44015928	T	0.248319	0.0197578	0.00333009	2.97e-09	241520	0.244078	0.0192185	0.00333069	7.92e-09	-0.00186616
LDL	2	rs75331444	44069772	A	0.0650788	-0.0459867	0.00582927	3.05e-15	241778	0.06124	-0.0347372	0.00593532	4.84e-09	-0.187674
LDL	2	rs4299376	44072576	G	0.323661	0.0351699	0.00307503	2.72e-30	241426	0.327762	0.0314713	0.00313175	9.27e-24	0
LDL	5	rs10045497	74636484	A	0.373081	0.0262616	0.00297218	9.94e-19	241917	0.374394	0.0262616	0.00297265	1.01e-18	0
LDL	5	rs13167071	156373637	G	0.359897	-0.0234651	0.00300892	6.26e-15	239669	0.355448	-0.0234651	0.0030093	6.31e-15	0
LDL	6	rs7746081	16126934	A	0.301467	-0.019205	0.00313962	9.54e-10	240837	0.30275	-0.0193122	0.0031399	7.72e-10	-0.00519177
LDL	6	rs144861591	26072992	T	0.0750941	-0.0353099	0.00546974	1.08e-10	240580	0.0762854	-0.0359923	0.00547092	4.74e-11	-0.0160935
LDL	6	rs686250	32585055	A	0.431726	-0.0182184	0.00305722	2.54e-09	218013	0.432655	-0.0185266	0.00305782	1.37e-09	0
LDL	7	rs17725246	44581986	C	0.183283	0.0231455	0.00371512	4.66e-10	241970	0.185606	0.0231455	0.00371541	4.68e-10	0
LDL	8	rs13702	19824492	C	0.285841	-0.023031	0.00318057	4.45e-13	242074	0.28778	-0.023031	0.00318091	4.47e-13	0
LDL	8	rs2954021	126482077	A	0.494023	0.038124	0.0028744	3.78e-40	241927	0.491891	0.038124	0.00287544	4.03e-40	0
LDL	9	9:136149709_AC_A	136149709	A	0.175789	0.0235588	0.00380645	6.05e-10	238140	0.175669	0.0235588	0.00380675	6.07e-10	0
Platelet	12	rs3184504	111884608	T	0.482691	0.027491	0.00284827	4.83e-22	246732	0.482889	0.027491	0.0028488	4.91e-22	0
Platelet	12	rs11553699	122216910	G	0.120934	-0.0318931	0.00452355	1.78e-12	229800	0.122864	-0.0318931	0.00452403	1.79e-12	0
Platelet	18	rs11082304	20720973	G	0.486367	0.016854	0.00284796	3.26e-09	246732	0.477968	0.016854	0.00284816	3.27e-09	0
Platelet	3	rs1354034	56849749	T	0.399735	-0.024461	0.00290572	3.82e-17	246732	0.395215	-0.024461	0.00290613	3.86e-17	0
Platelet	5	rs7705526	1285974	A	0.32148	0.0209178	0.00312494	2.17e-11	234687	0.317828	0.0209178	0.00312523	2.18e-11	0
Platelet	5	rs114694170	88180196	C	0.0572641	0.0390519	0.00615162	2.18e-10	244708	0.0564972	0.0390519	0.00615211	2.19e-10	0
Platelet	6	rs5745587	33545125	G	0.177496	0.0319094	0.00373823	1.39e-17	245010	0.180009	0.0319094	0.00373878	1.41e-17	0
Platelet	6	rs9399136	135402339	C	0.256919	0.0283382	0.00328373	6.14e-18	242813	0.258575	0.0283382	0.00328423	6.21e-18	0
Platelet	9	rs692502	4745645	G	0.441602	-0.0241338	0.00291458	1.23e-16	238627	0.439686	-0.0241338	0.00291499	1.24e-16	0
SBP	1	rs112895549	228154265	A	0.107279	0.0276528	0.00470079	4.04e-09	236229	0.109294	0.0276528	0.00470112	4.05e-09	0
Triglycerides	10	rs7896518	65104500	G	0.431424	-0.0250626	0.00297568	3.69e-17	230130	0.433716	-0.0251303	0.00297616	3.07e-17	0.00422073
Triglycerides	10	rs4418728	94839724	T	0.4497	-0.0200574	0.00288875	3.83e-12	242071	0.447301	-0.0200574	0.00288903	3.85e-12	0
Triglycerides	11	rs102275	61557803	C	0.351087	0.042715	0.00300811	9.17e-46	242338	0.350621	0.042715	0.00300935	9.97e-46	0
Triglycerides	11	rs1508103	116379978	G	0.0590728	-0.037344	0.00609757	9.1e-10	241906	0.060482	-0.0732305	0.00618109	2.22e-32	-0.0187237
Triglycerides	11	11:116526032_CCT_C	116526032	C	0.0720167	0.127077	0.00562342	4.55e-113	236080	0.0700295	-0.0949158	0.00711174	1.24e-40	-0.0674385
Triglycerides	11	rs74849419	116583685	A	0.0570376	0.142977	0.00619871	1.03e-117	241411	0.0526116	-0.152631	0.0101972	1.19e-50	0.749769
Triglycerides	11	rs10466588	116610249	G	0.0748409	0.186882	0.00544902	8.87e-258	242033	0.0692634	0.199743	0.0119234	5.46e-63	-0.171136
Triglycerides	11	rs180349	116611827	A	0.279344	0.024437	0.00320665	2.52e-14	241489	0.279711	-0.0411502	0.00420941	1.43e-22	0.352635
Triglycerides	11	11:116639730_CA_C	116639730	C	0.341462	0.0278439	0.00351499	2.35e-15	179908	0.341971	0.0278795	0.00446108	4.12e-10	-0.0675865
Triglycerides	11	rs2266788	116660686	G	0.0667241	0.253648	0.00573299	0	242339	0.0681405	0.711728	0.0179714	0	0.931556
Triglycerides	11	rs2072560	116661826	T	0.0578495	0.210553	0.00613919	8.84e-258	242229	0.0600849	-0.355399	0.0182356	1.36e-84	-0.0812258
Triglycerides	11	rs12287066	116662331	T	0.0638005	0.201103	0.00586366	8.85e-258	242292	0.0589883	0.169945	0.0125741	1.27e-41	-0.137801
Triglycerides	11	rs6589568	116670738	G	0.20585	0.0323715	0.00357885	1.49e-19	238717	0.207796	-0.0397225	0.00466861	1.76e-17	-0.0472173
Triglycerides	11	rs11216180	116773378	T	0.10763	0.0588803	0.00464151	7.11e-37	241482	0.106215	-0.0656821	0.0054978	6.73e-33	0
Triglycerides	16	rs173539	56988044	T	0.332755	-0.0187693	0.00304814	7.38e-10	242339	0.32874	-0.0187693	0.00304837	7.41e-10	0
Triglycerides	16	rs12443634	81524274	A	0.283044	0.0257331	0.00323003	1.63e-15	236100	0.280694	0.0257331	0.00323046	1.64e-15	0
Triglycerides	17	rs377227476	41912853	T	0.0861889	0.0319872	0.00542002	3.6e-09	216069	0.0862745	0.0319872	0.00542044	3.61e-09	0
Triglycerides	19	rs58542926	19379549	T	0.0755791	-0.0666063	0.00543255	1.47e-34	242339	0.0735918	-0.0666063	0.00543422	1.54e-34	0
Triglycerides	19	rs438811	45416741	T	0.235919	0.0648476	0.0033923	1.85e-81	240670	0.236794	0.0649149	0.00339487	1.67e-81	0.00217378
Triglycerides	19	rs5112	45430280	C	0.462202	-0.0356678	0.00336612	3.11e-26	177414	0.467131	-0.035788	0.00336718	2.2e-26	0
Triglycerides	1	1:62929378_TA_T	62929378	T	0.347893	-0.0524226	0.00303801	1.02e-66	238499	0.346846	-0.0524226	0.0030399	1.22e-66	0
Triglycerides	1	rs764992666	230295076	TCTTAAAGTGTTCAGCACTCCC	0.3952	0.0225687	0.00295125	2.05e-14	240118	0.388957	0.0225687	0.0029516	2.07e-14	0
Triglycerides	20	rs6073958	44551855	C	0.199108	0.0226249	0.00359913	3.25e-10	242016	0.199469	0.0224843	0.0035995	4.2e-10	-0.00689957
Triglycerides	22	rs2267372	38598234	A	0.401023	-0.0176676	0.00293233	1.69e-09	242048	0.395196	-0.0176004	0.00293255	1.95e-09	0.00258901
Triglycerides	22	rs2294915	44340904	T	0.230647	-0.0303748	0.0034182	6.32e-19	241080	0.234615	-0.0303218	0.00341876	7.37e-19	0
Triglycerides	2	rs673548	21237544	A	0.204852	-0.0307984	0.00355847	4.93e-18	242339	0.205936	-0.029794	0.00355927	5.72e-17	-0.0119525
Triglycerides	2	rs1260326	27730940	T	0.393795	0.0697091	0.00293647	1.42e-124	242338	0.400969	0.0694149	0.00294009	3.05e-123	0
Triglycerides	2	rs2673140	227159867	G	0.358431	-0.0210009	0.002997	2.43e-12	242026	0.365469	-0.0210009	0.0029973	2.44e-12	0
Triglycerides	4	rs1471251	87976359	T	0.398159	0.0199387	0.00294534	1.29e-11	240480	0.404301	0.0199387	0.00294561	1.3e-11	0
Triglycerides	5	rs40270	55804552	A	0.226083	-0.0219994	0.00343644	1.54e-10	241946	0.223259	-0.0228633	0.00343903	2.97e-11	0.0376507
Triglycerides	5	rs13179413	55868097	T	0.27807	0.0218533	0.00329934	3.51e-11	228763	0.278821	0.022657	0.00330186	6.8e-12	0
Triglycerides	5	rs7720409	118728256	A	0.269072	-0.021491	0.00326294	4.51e-11	238744	0.264385	-0.021491	0.00326323	4.52e-11	0
Triglycerides	5	rs13167071	156373637	G	0.359897	-0.0227732	0.00300728	3.66e-14	239934	0.355448	-0.0227732	0.00300763	3.68e-14	0
Triglycerides	6	rs9378248	31326289	A	0.338312	0.0234123	0.0030415	1.39e-14	241390	0.342197	0.0234123	0.00304187	1.4e-14	0
Triglycerides	6	rs4711750	43757082	A	0.498567	0.0302397	0.00287215	6.38e-26	242339	0.500984	0.0306076	0.00287333	1.7e-26	-0.0193043
Triglycerides	6	rs6458867	52629980	A	0.355967	0.0193738	0.00300637	1.16e-10	241265	0.353299	0.0199908	0.00300718	2.98e-11	0
Triglycerides	6	rs4052908	139842576	A	0.363162	0.0264259	0.00301847	2.05e-18	237208	0.36311	0.0264259	0.00301895	2.07e-18	0
Triglycerides	6	rs12212507	161071982	A	0.0601315	-0.0355017	0.0060417	4.2e-09	242339	0.0600394	-0.134767	0.0086492	9.73e-55	0.718571
Triglycerides	6	rs11751347	161092438	T	0.101015	0.0335097	0.00478629	2.54e-12	240296	0.101679	0.109905	0.00685219	6.77e-58	0
Triglycerides	7	rs13234131	73025975	G	0.128852	-0.0801459	0.00428518	4.68e-78	242228	0.132818	-0.0790187	0.00429281	1.15e-75	-0.0469296
Triglycerides	7	rs4717804	73111504	A	0.0602914	0.0403626	0.00615355	5.41e-11	233019	0.057923	0.0351429	0.00616063	1.17e-08	0
Triglycerides	7	rs35363532	130445428	CT	0.492816	-0.0216222	0.00288732	6.96e-14	239900	0.496556	-0.0216222	0.00288765	7e-14	0
Triglycerides	8	rs9657541	10643164	T	0.205192	0.0247353	0.00355647	3.53e-12	242340	0.202756	0.0241773	0.00356032	1.12e-11	0.0235747
Triglycerides	8	rs4921913	18272377	C	0.220852	0.0306296	0.00346281	9.13e-19	242244	0.22834	0.0318809	0.00346487	3.54e-20	0.0100087
Triglycerides	8	rs117199990	19820916	T	0.100784	-0.120691	0.004766	1.77e-141	242248	0.100061	-0.10018	0.00546243	3.99e-75	-0.169096
Triglycerides	8	rs34150554	19834840	TA	0.183332	-0.0313869	0.00371878	3.17e-17	241412	0.186608	-0.0408338	0.00416846	1.17e-22	0.362473
Triglycerides	8	rs6586886	19875408	A	0.420453	-0.0501956	0.00292046	3.29e-66	240287	0.419581	-0.0262098	0.00332485	3.2e-15	-0.0410025
Triglycerides	8	rs28597716	19936687	G	0.184414	-0.0610072	0.00375505	2.36e-59	235500	0.188607	-0.0417139	0.00408041	1.56e-24	0
Triglycerides	8	rs10113750	59464692	T	0.321089	0.0189366	0.00307943	7.78e-10	241838	0.315658	0.0189366	0.00307966	7.8e-10	0
Triglycerides	8	rs28601761	126500031	G	0.416634	-0.0624466	0.00297944	1.55e-97	231304	0.419082	-0.0446401	0.0035457	2.4e-36	-0.553645
Triglycerides	8	rs2954038	126507389	C	0.300038	0.0599764	0.00313199	9.75e-82	242339	0.297244	0.0345995	0.00372653	1.62e-20	0
Vitamin D	11	rs12283049	14690192	G	0.233067	-0.153922	0.00347895	0	229162	0.229396	0	0	0	0
Vitamin D	14	rs2144530	39552484	C	0.176659	0.0586709	0.00384934	1.87e-52	231765	0.17947	0.0586709	0.00385126	2.1e-52	0
Vitamin D	15	rs10468017	58678512	T	0.297056	-0.0197071	0.00321273	8.57e-10	231950	0.300045	-0.0200629	0.00321358	4.29e-10	-0.0193823
Vitamin D	19	rs10425963	48384626	G	0.165437	0.0452113	0.00395076	2.53e-30	231885	0.166238	0.0452113	0.00395187	2.62e-30	0
Vitamin D	1	rs903911	2326812	G	0.464494	-0.0176031	0.00295372	2.53e-09	230368	0.467577	-0.0176031	0.00295394	2.53e-09	0
Vitamin D	22	rs137896944	43285378	TTACACACACACA	0.482903	0.0184526	0.002953	4.14e-10	229583	0.482656	0.0184526	0.00295324	4.15e-10	0
Vitamin D	4	rs7439366	69964338	C	0.454819	-0.0203232	0.00294818	5.44e-12	231951	0.455936	-0.0210986	0.00294854	8.33e-13	-0.0067731
Vitamin D	4	rs11723621	72615362	G	0.292042	-0.125445	0.0032213	0	231538	0.285725	-0.125601	0.0032319	0	0
Vitamin D	7	rs1057868	75615006	T	0.285984	0.036547	0.00324822	2.28e-29	231950	0.281042	0.036547	0.0032491	2.36e-29	0
Vitamin D	8	rs4738684	59393273	A	0.334506	-0.0212128	0.00312243	1.09e-11	230330	0.328254	-0.0212128	0.00312274	1.1e-11	0
